# Supplementary material for: Mek1 Down Regulates Rad51 Activity during Yeast Meiosis by Phosphorylation of Hed1
Source: PubMed Central journal article supplement (PMC4970670; doi:10.1371/journal.pgen.1006226), 2016-08-02

# WT\_tetrad\_1

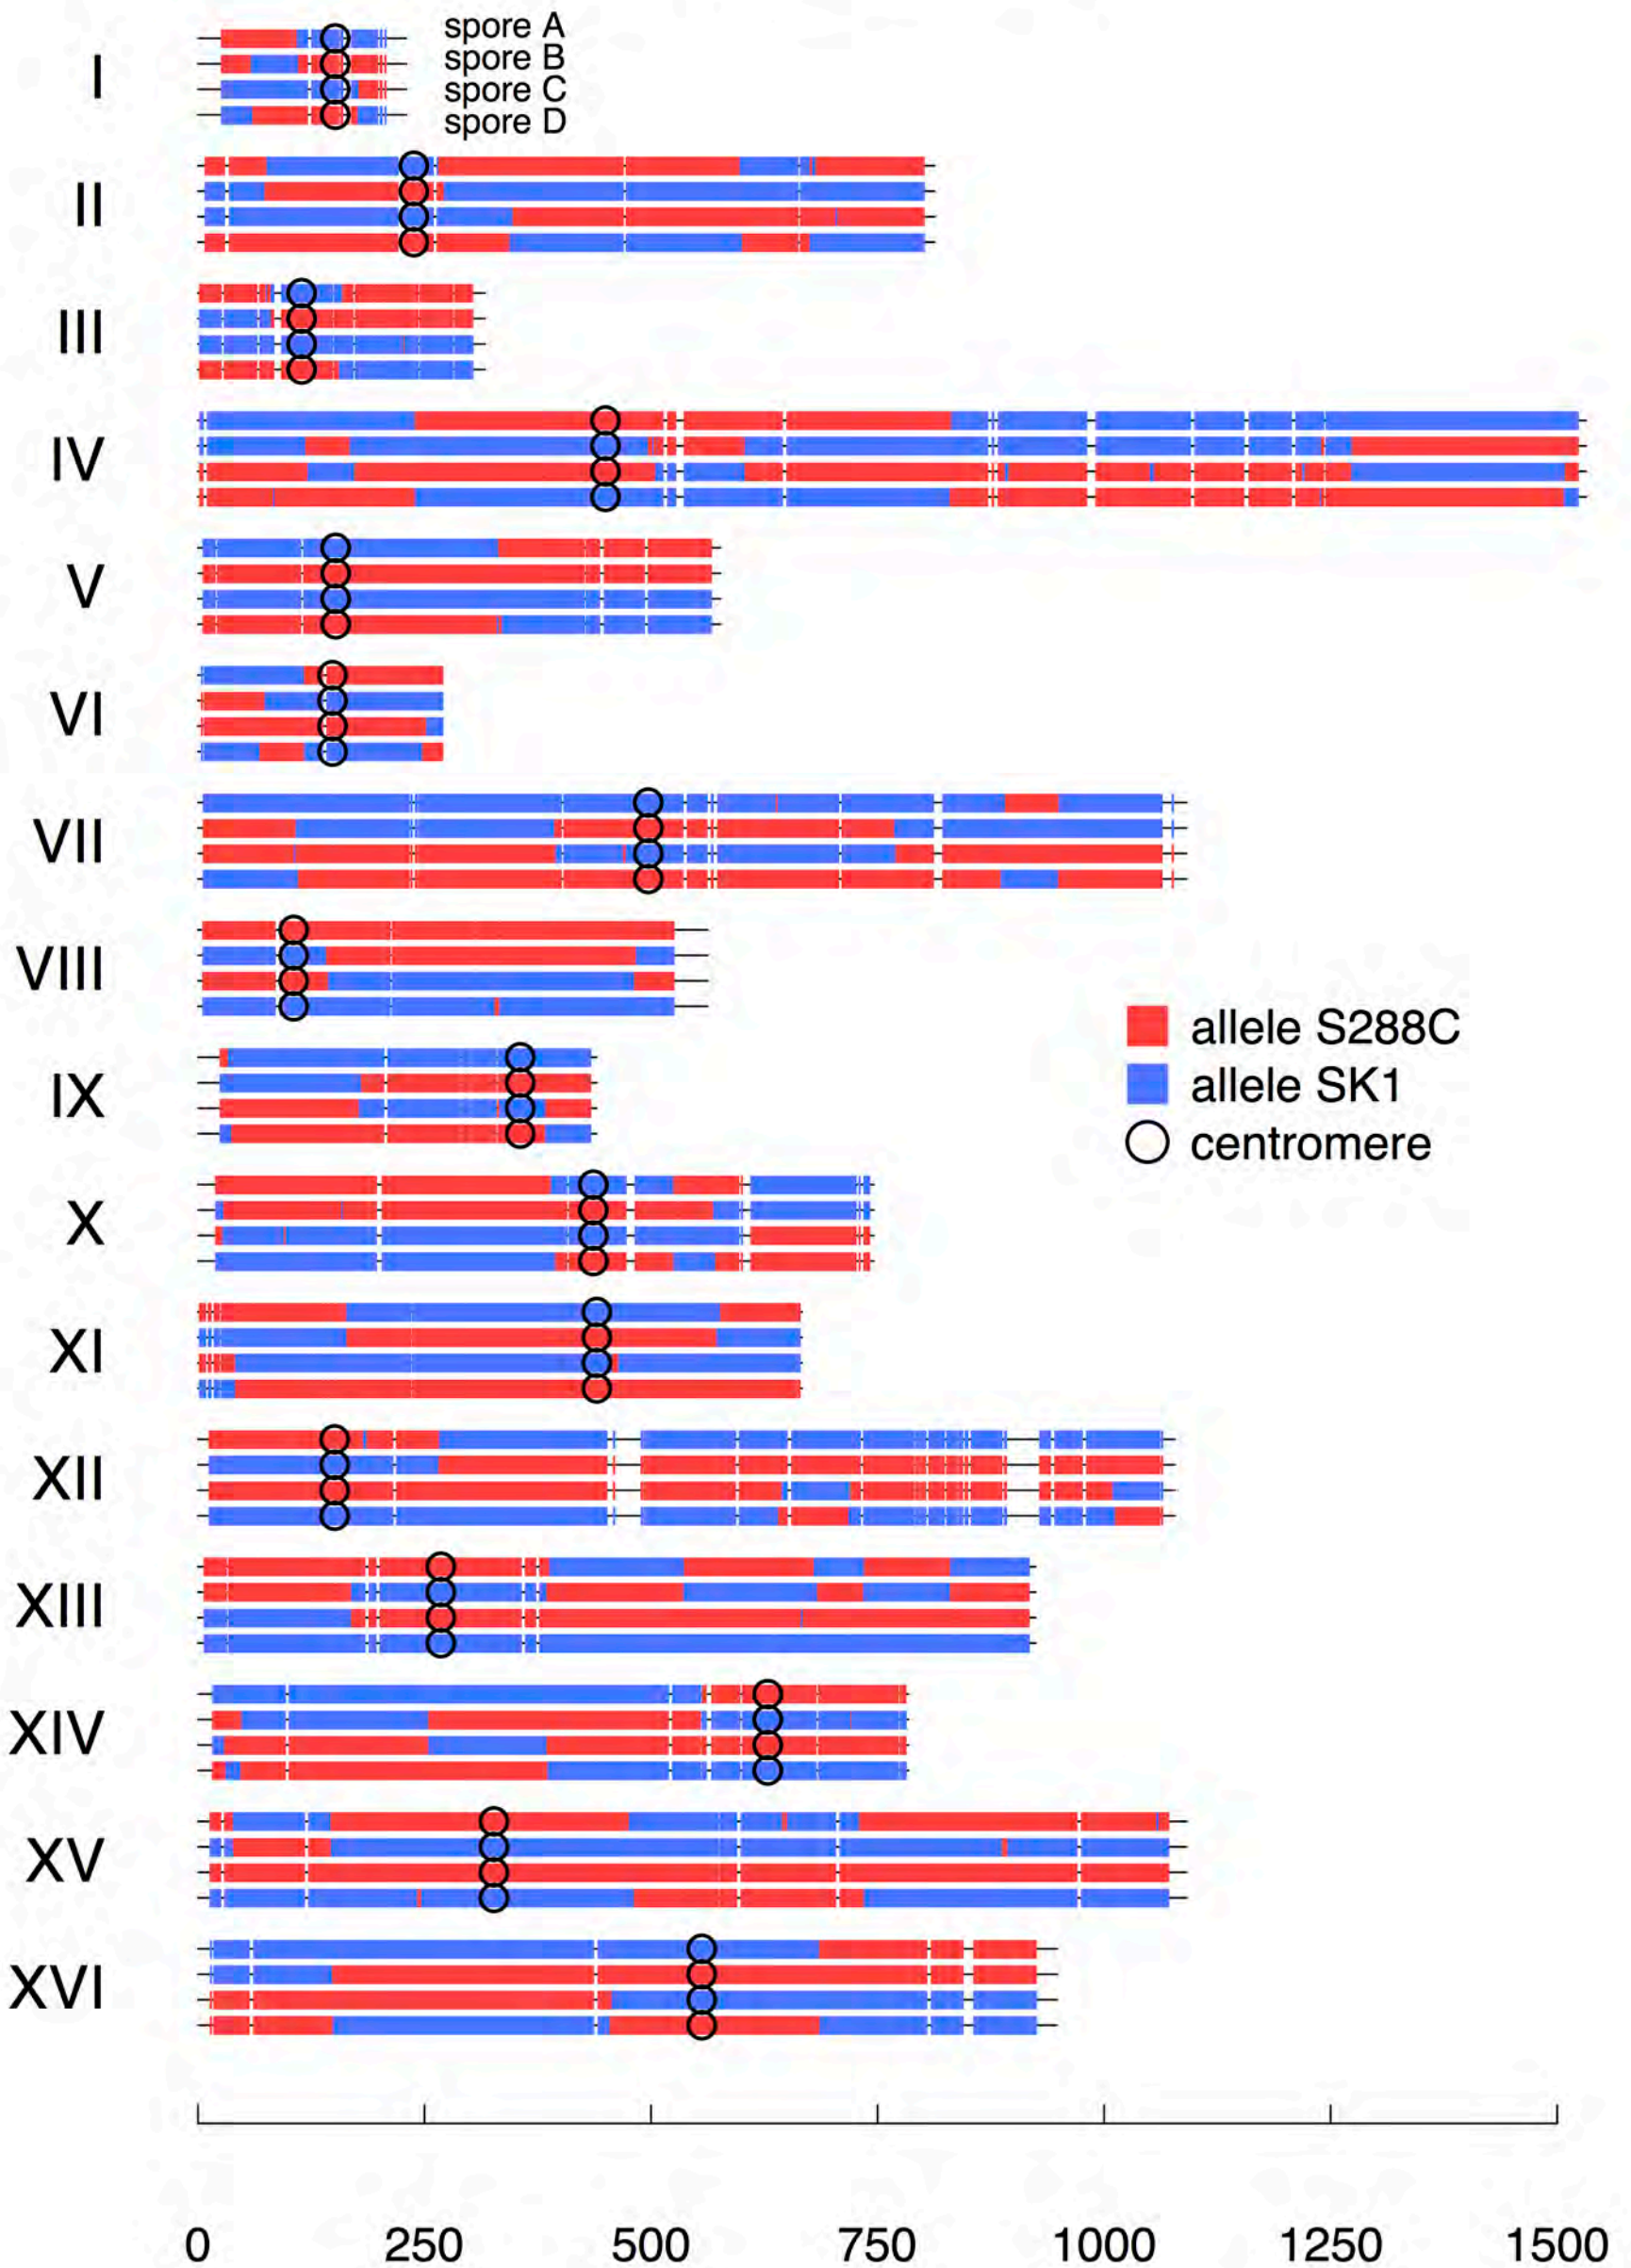

# WT\_tetrad\_2

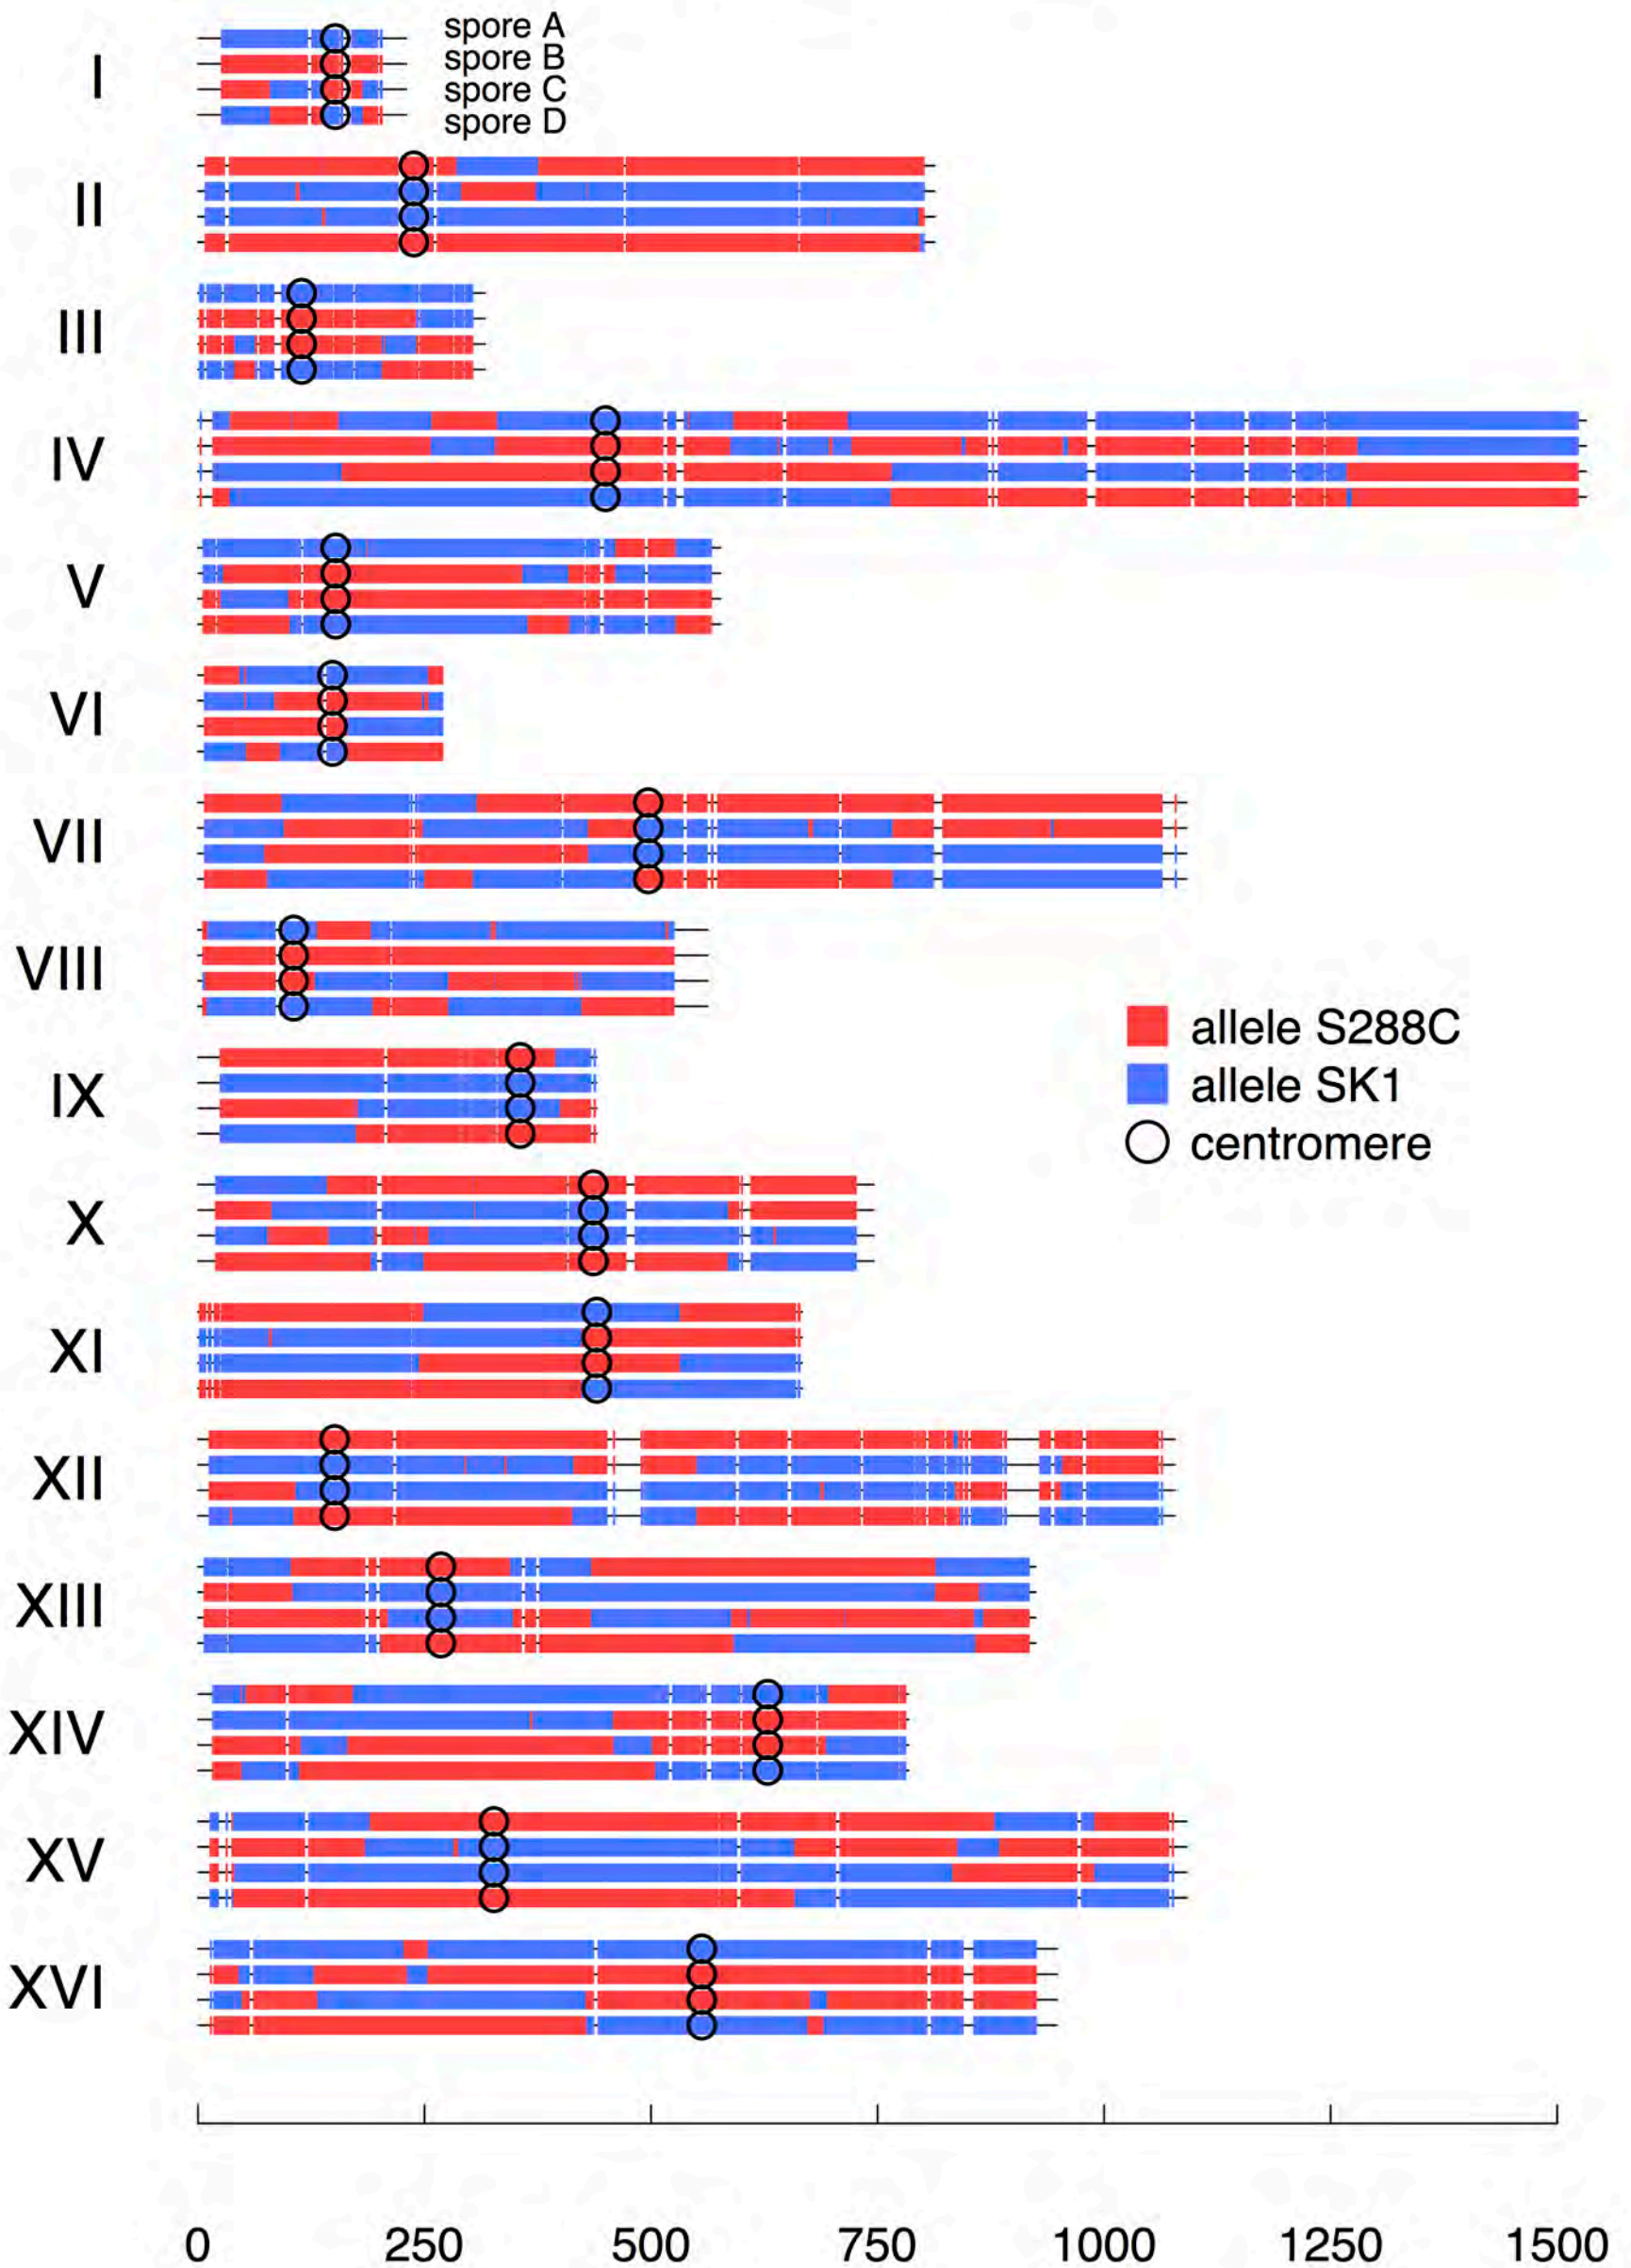

# WT\_tetrad\_3

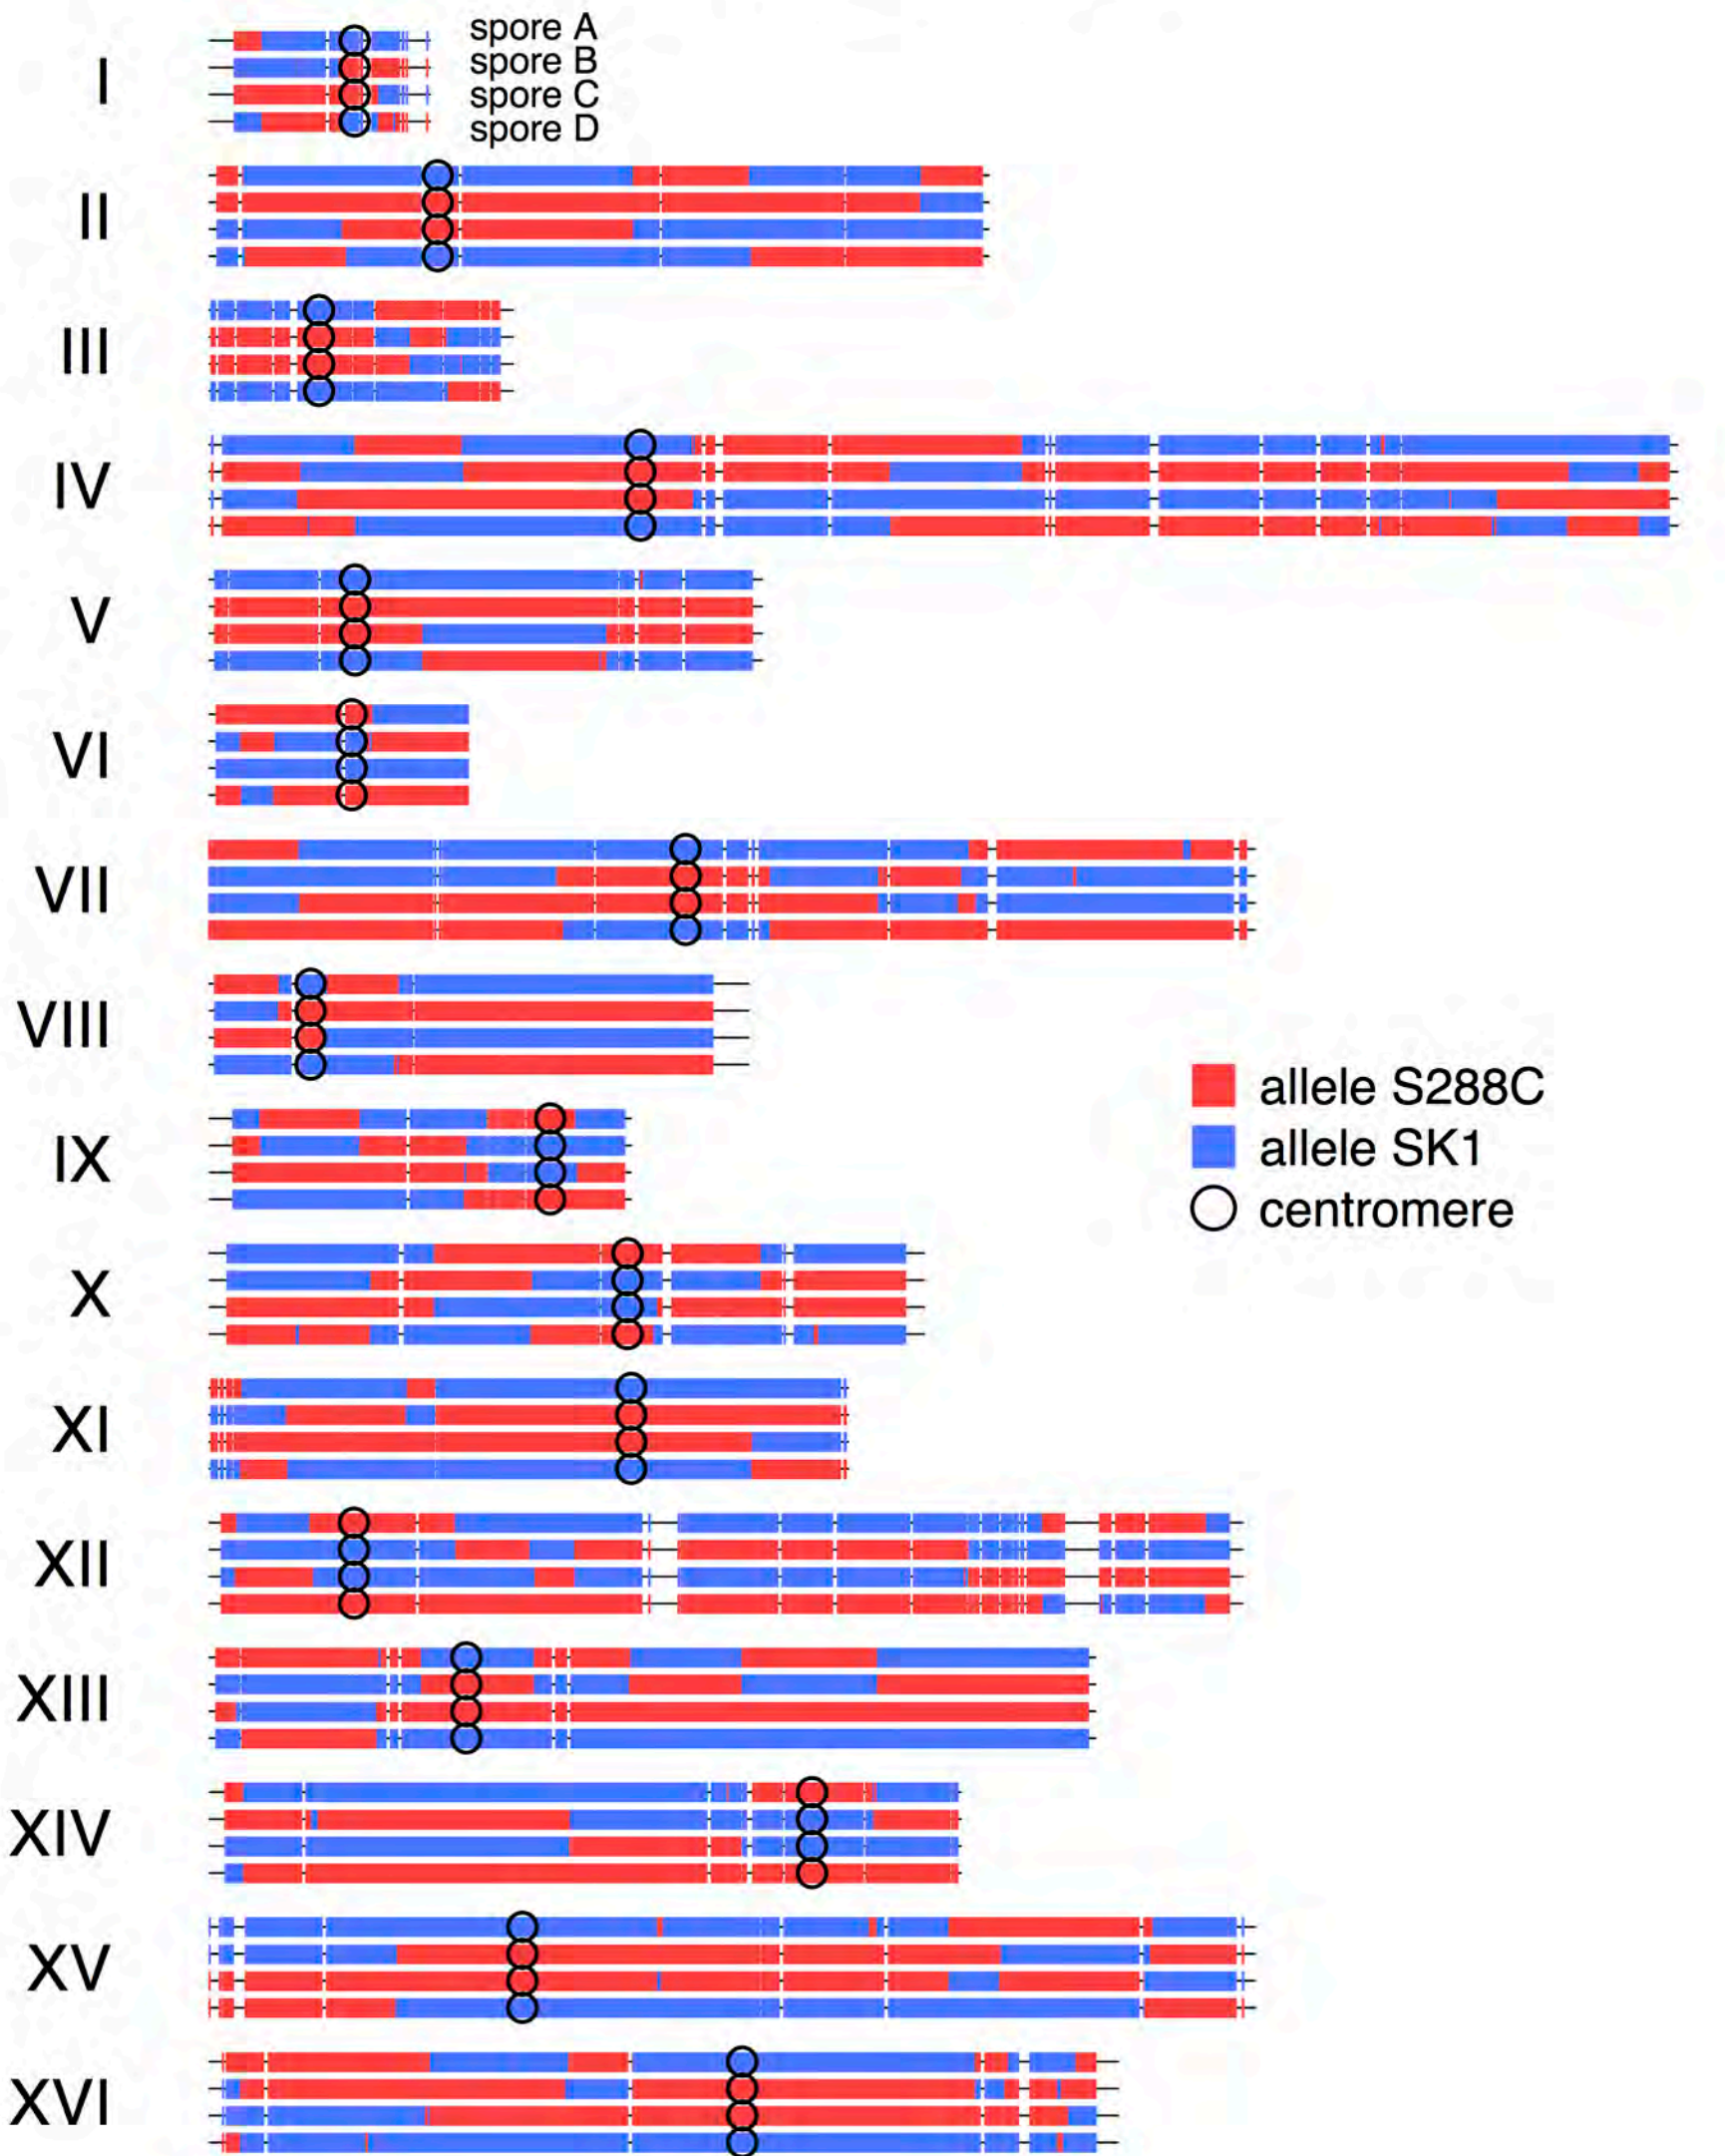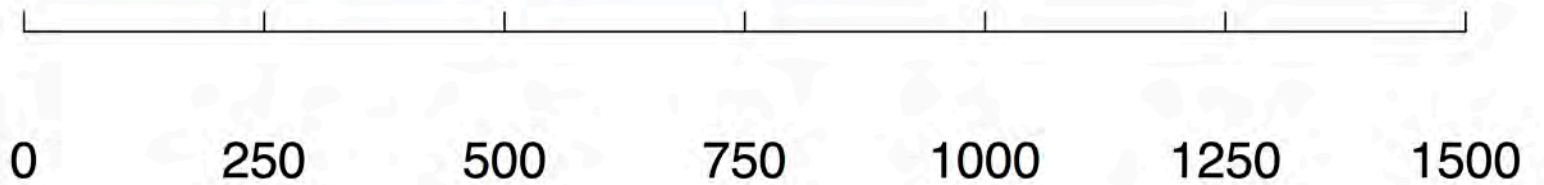

# WT\_tetrad\_4

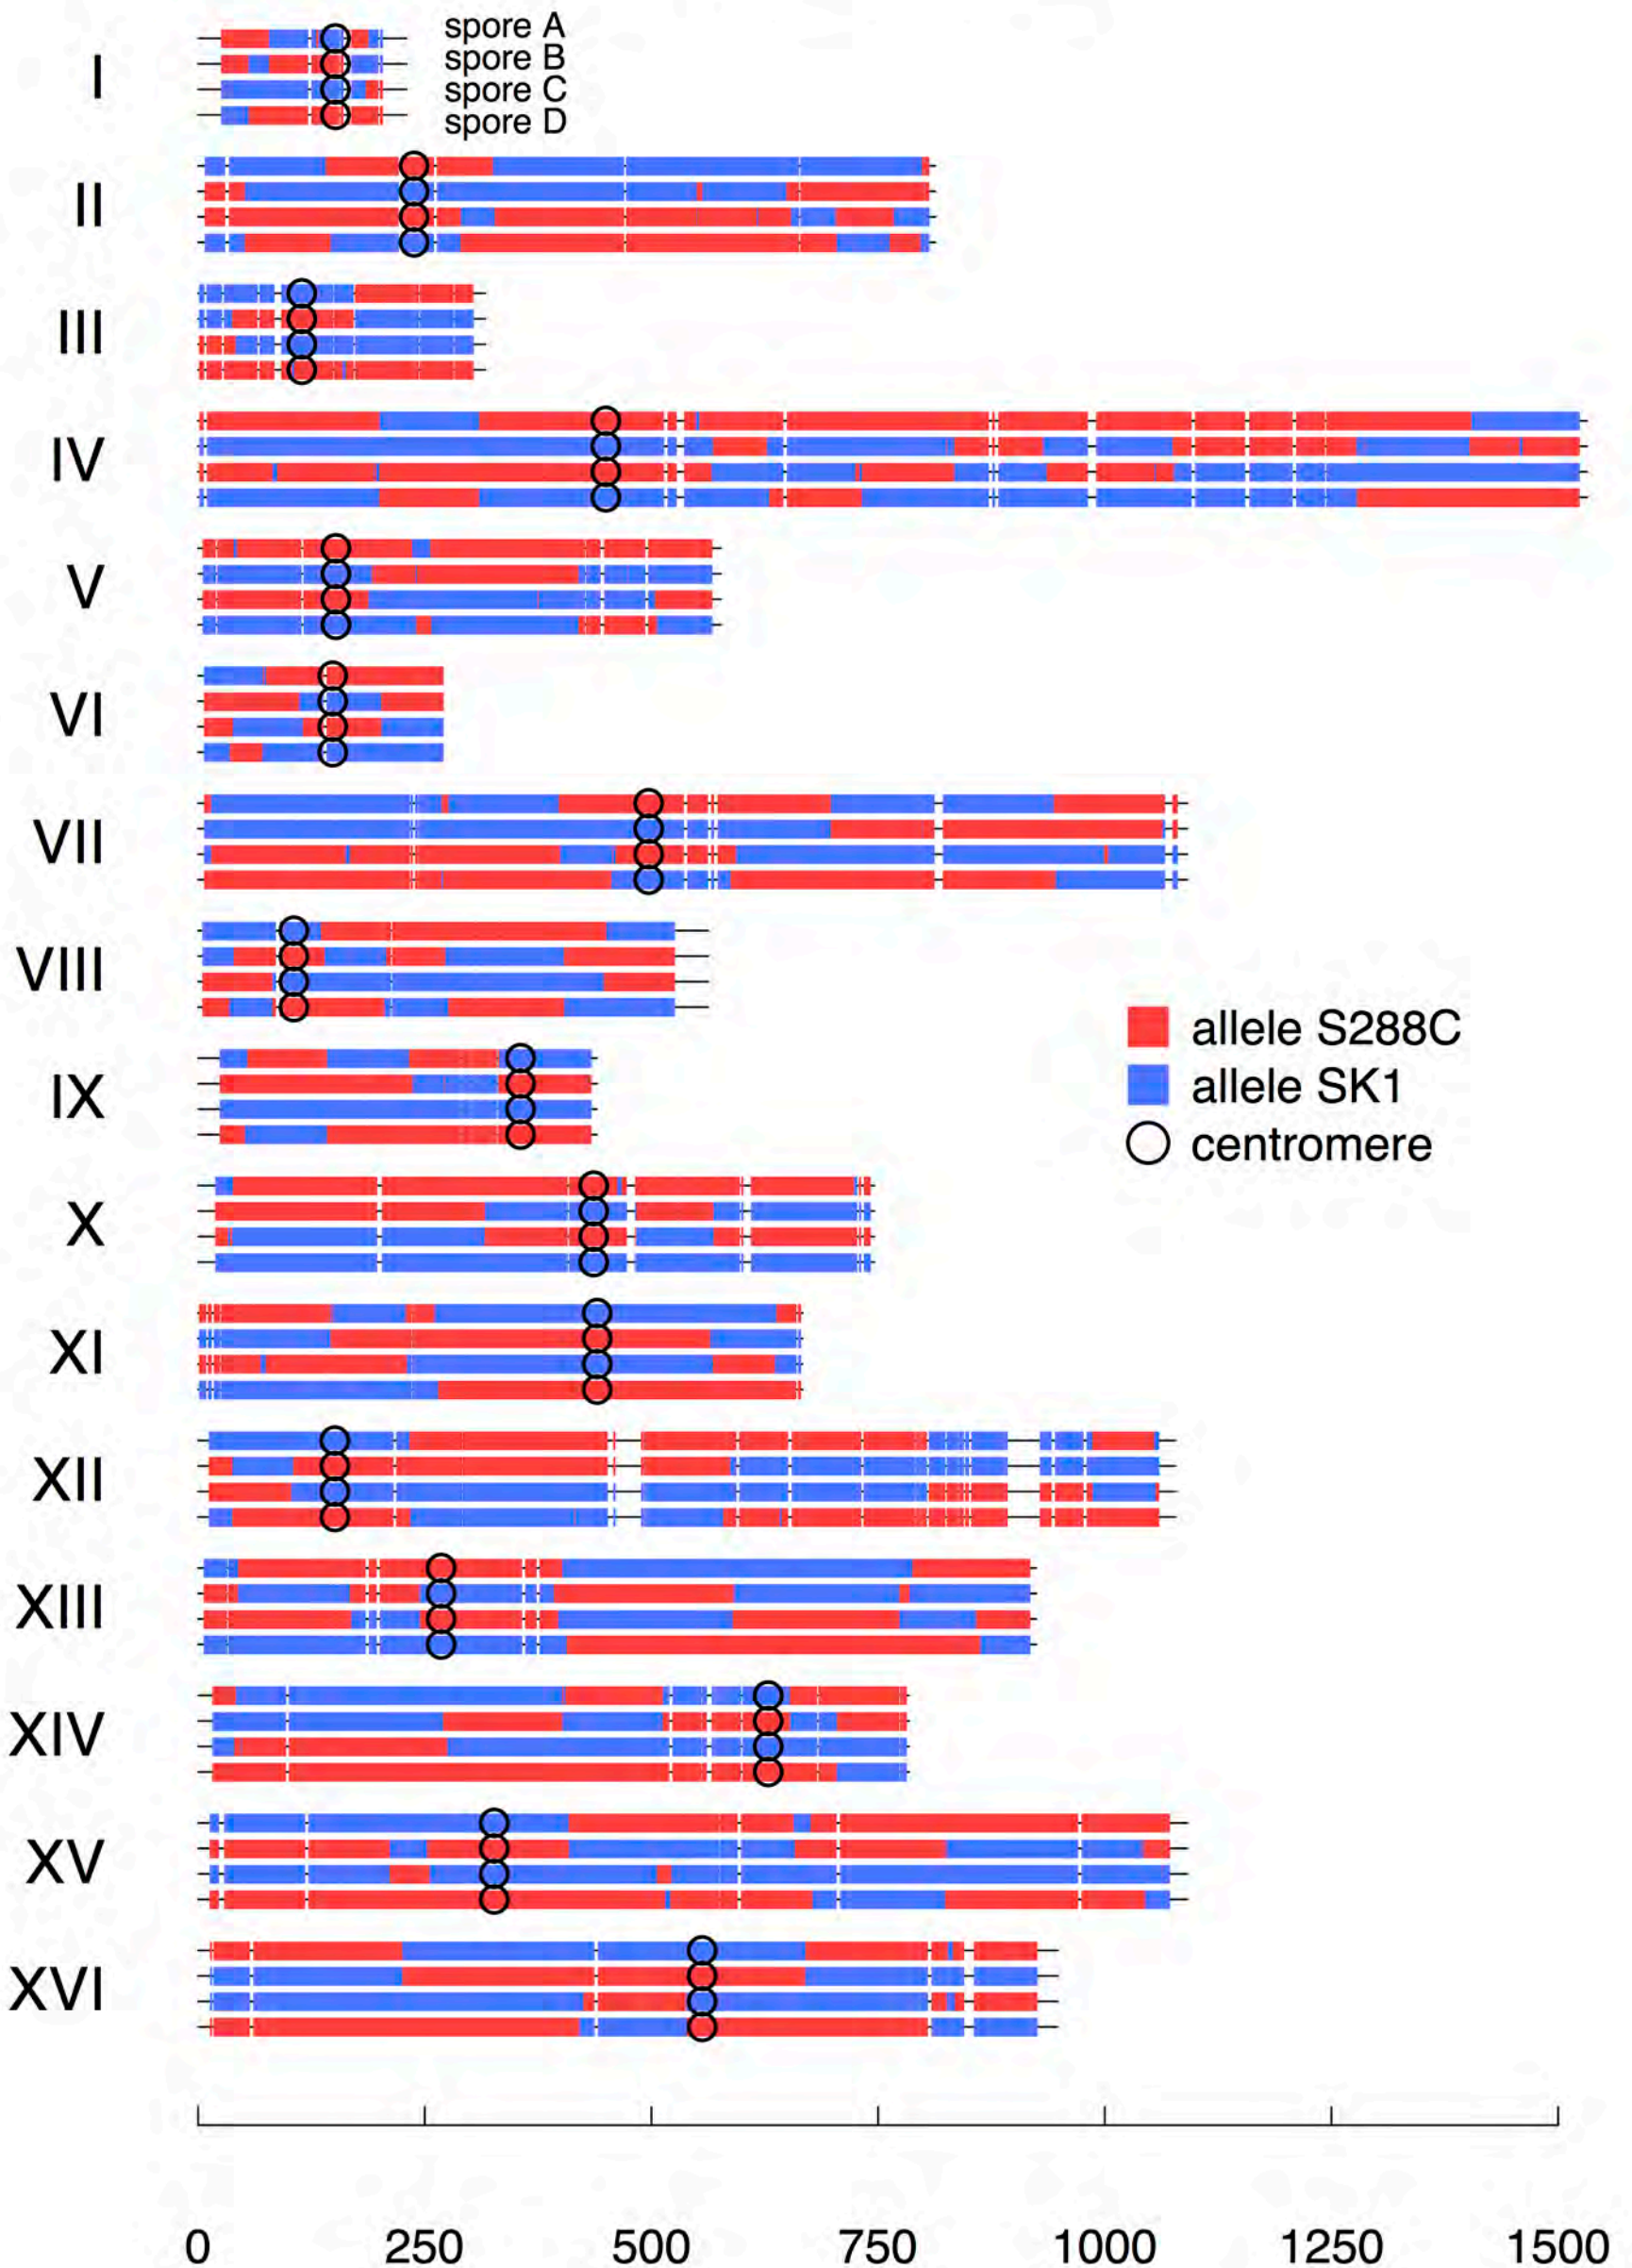

# WT\_tetrad\_5

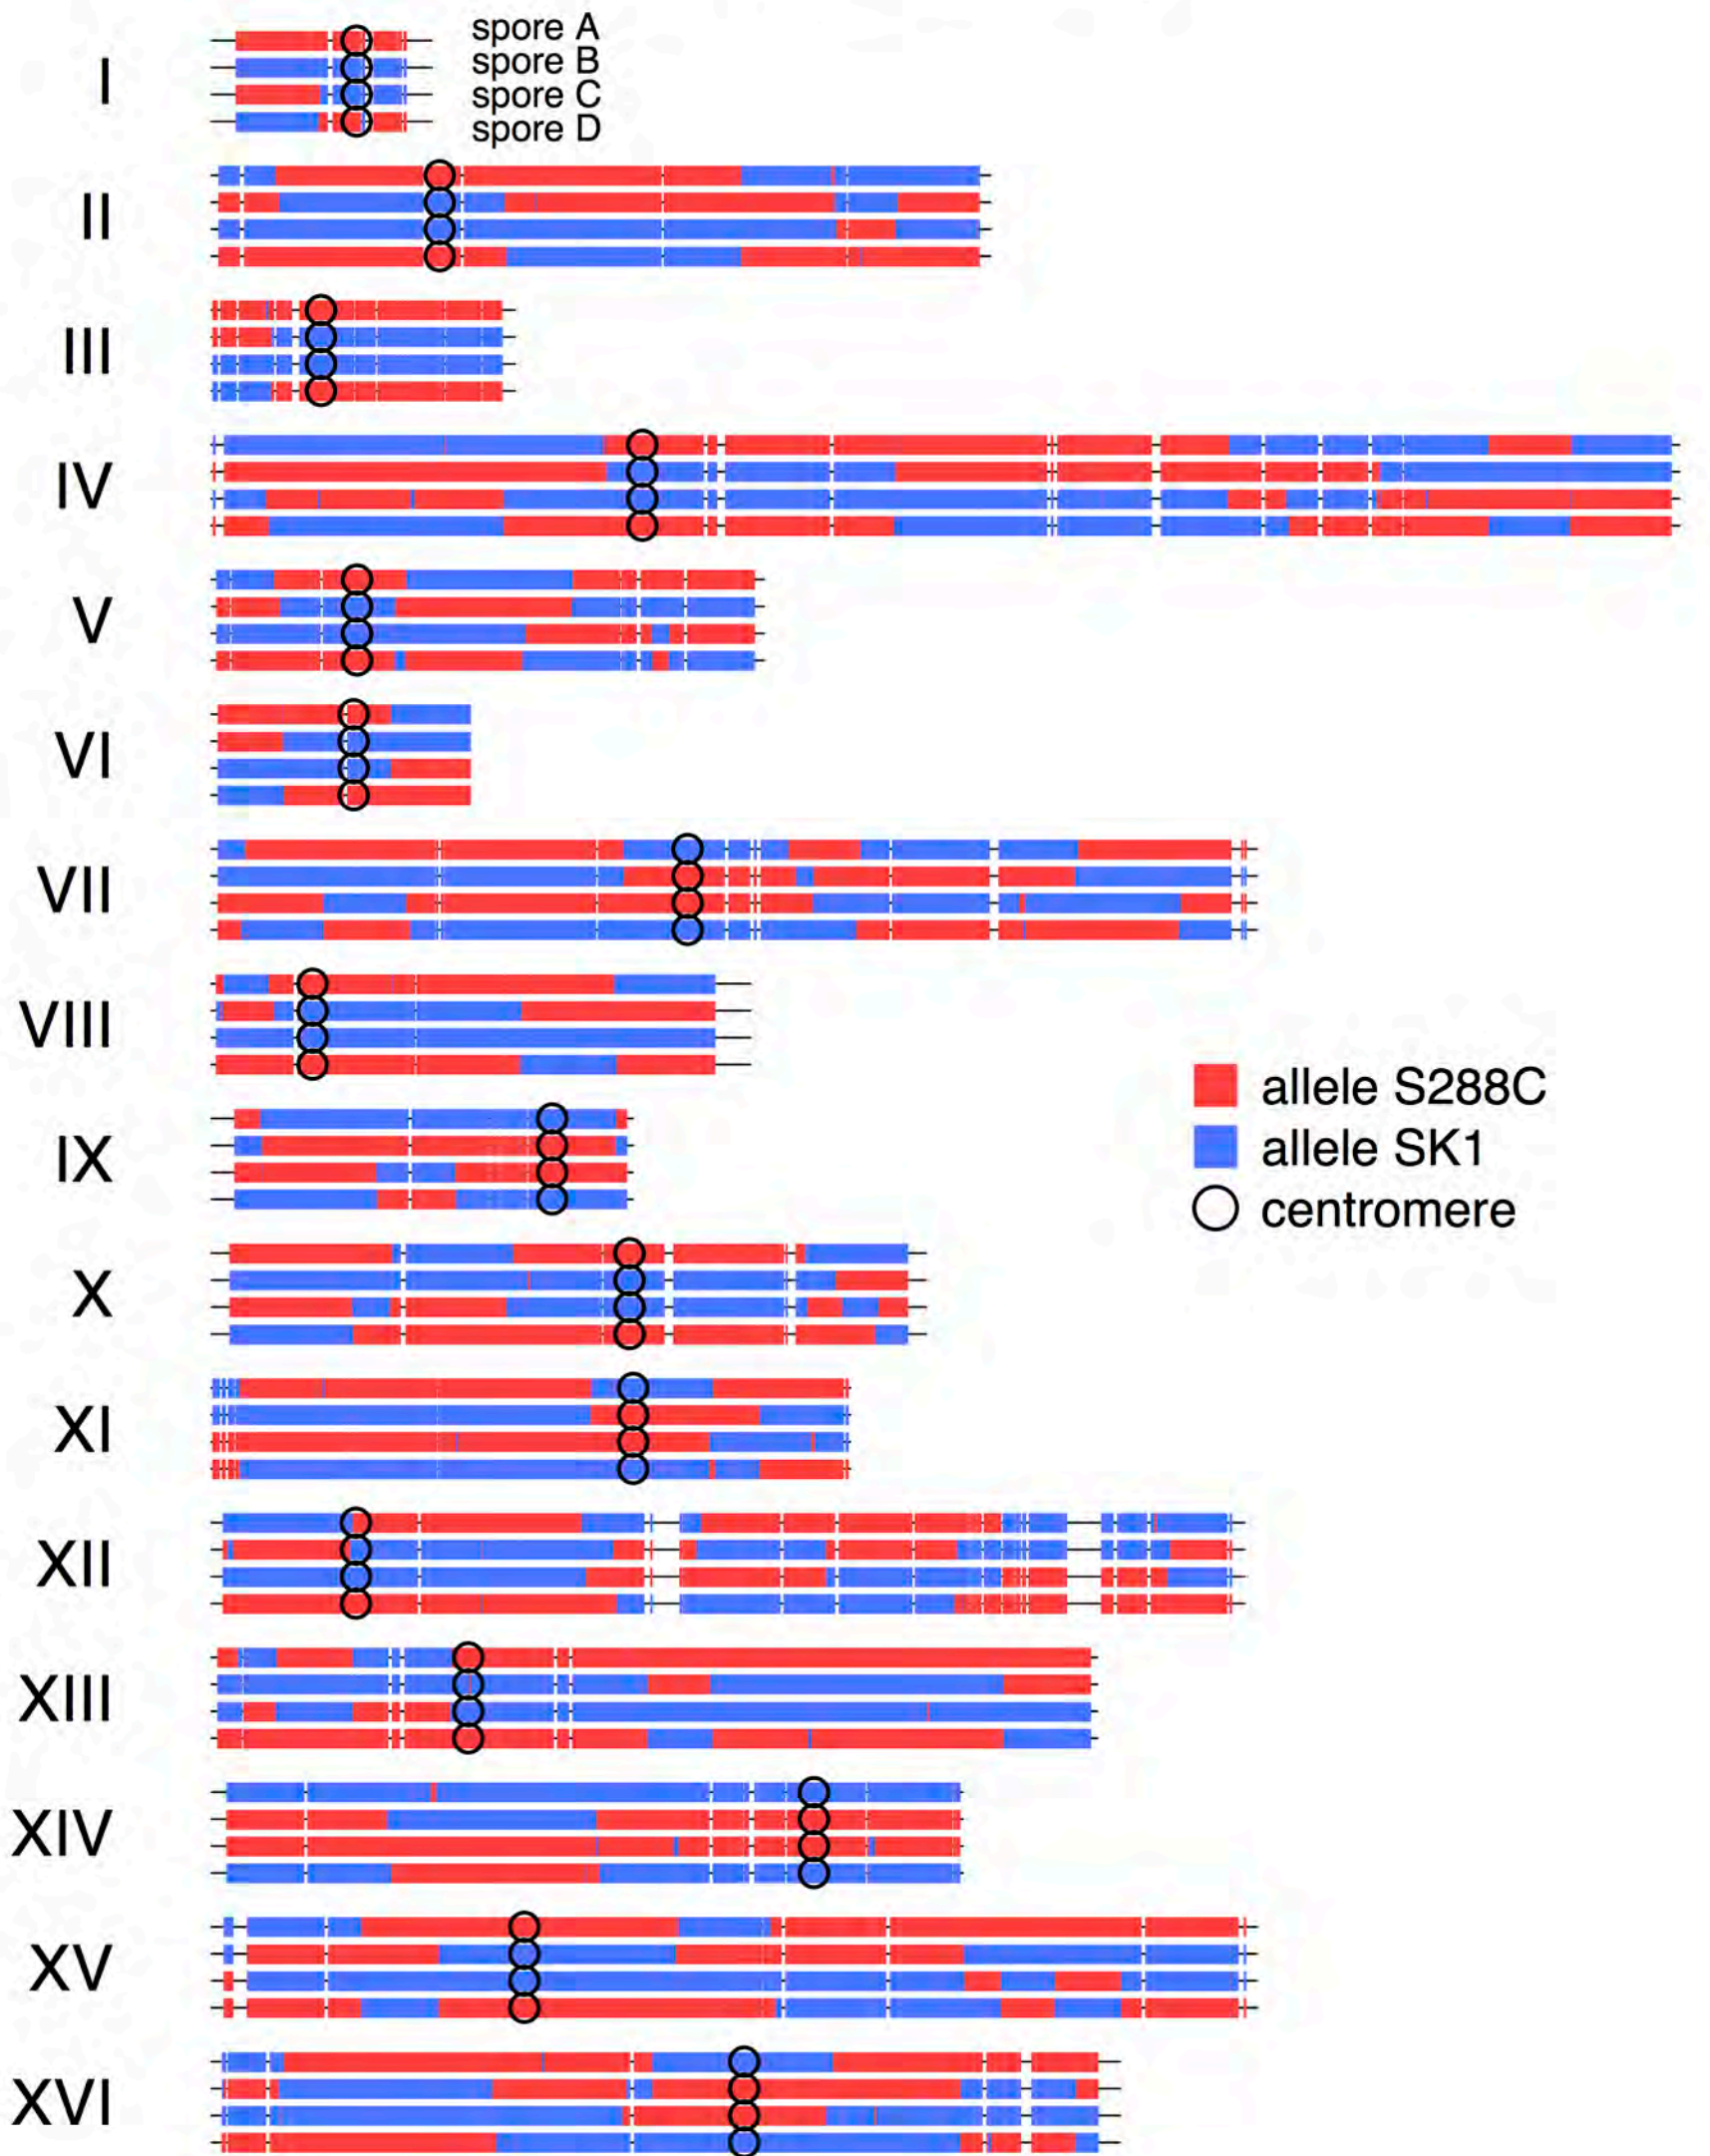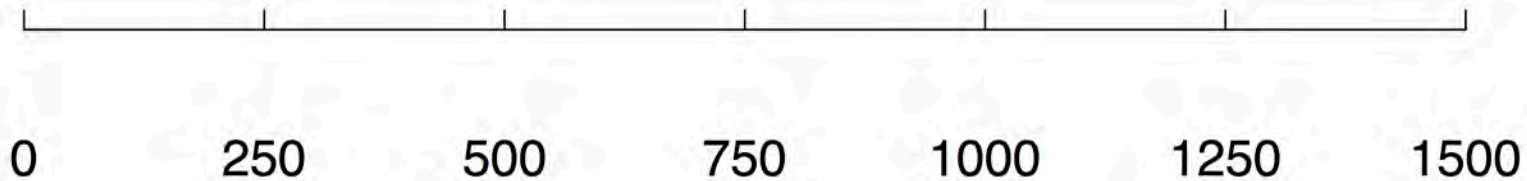

# WT\_tetrad\_6

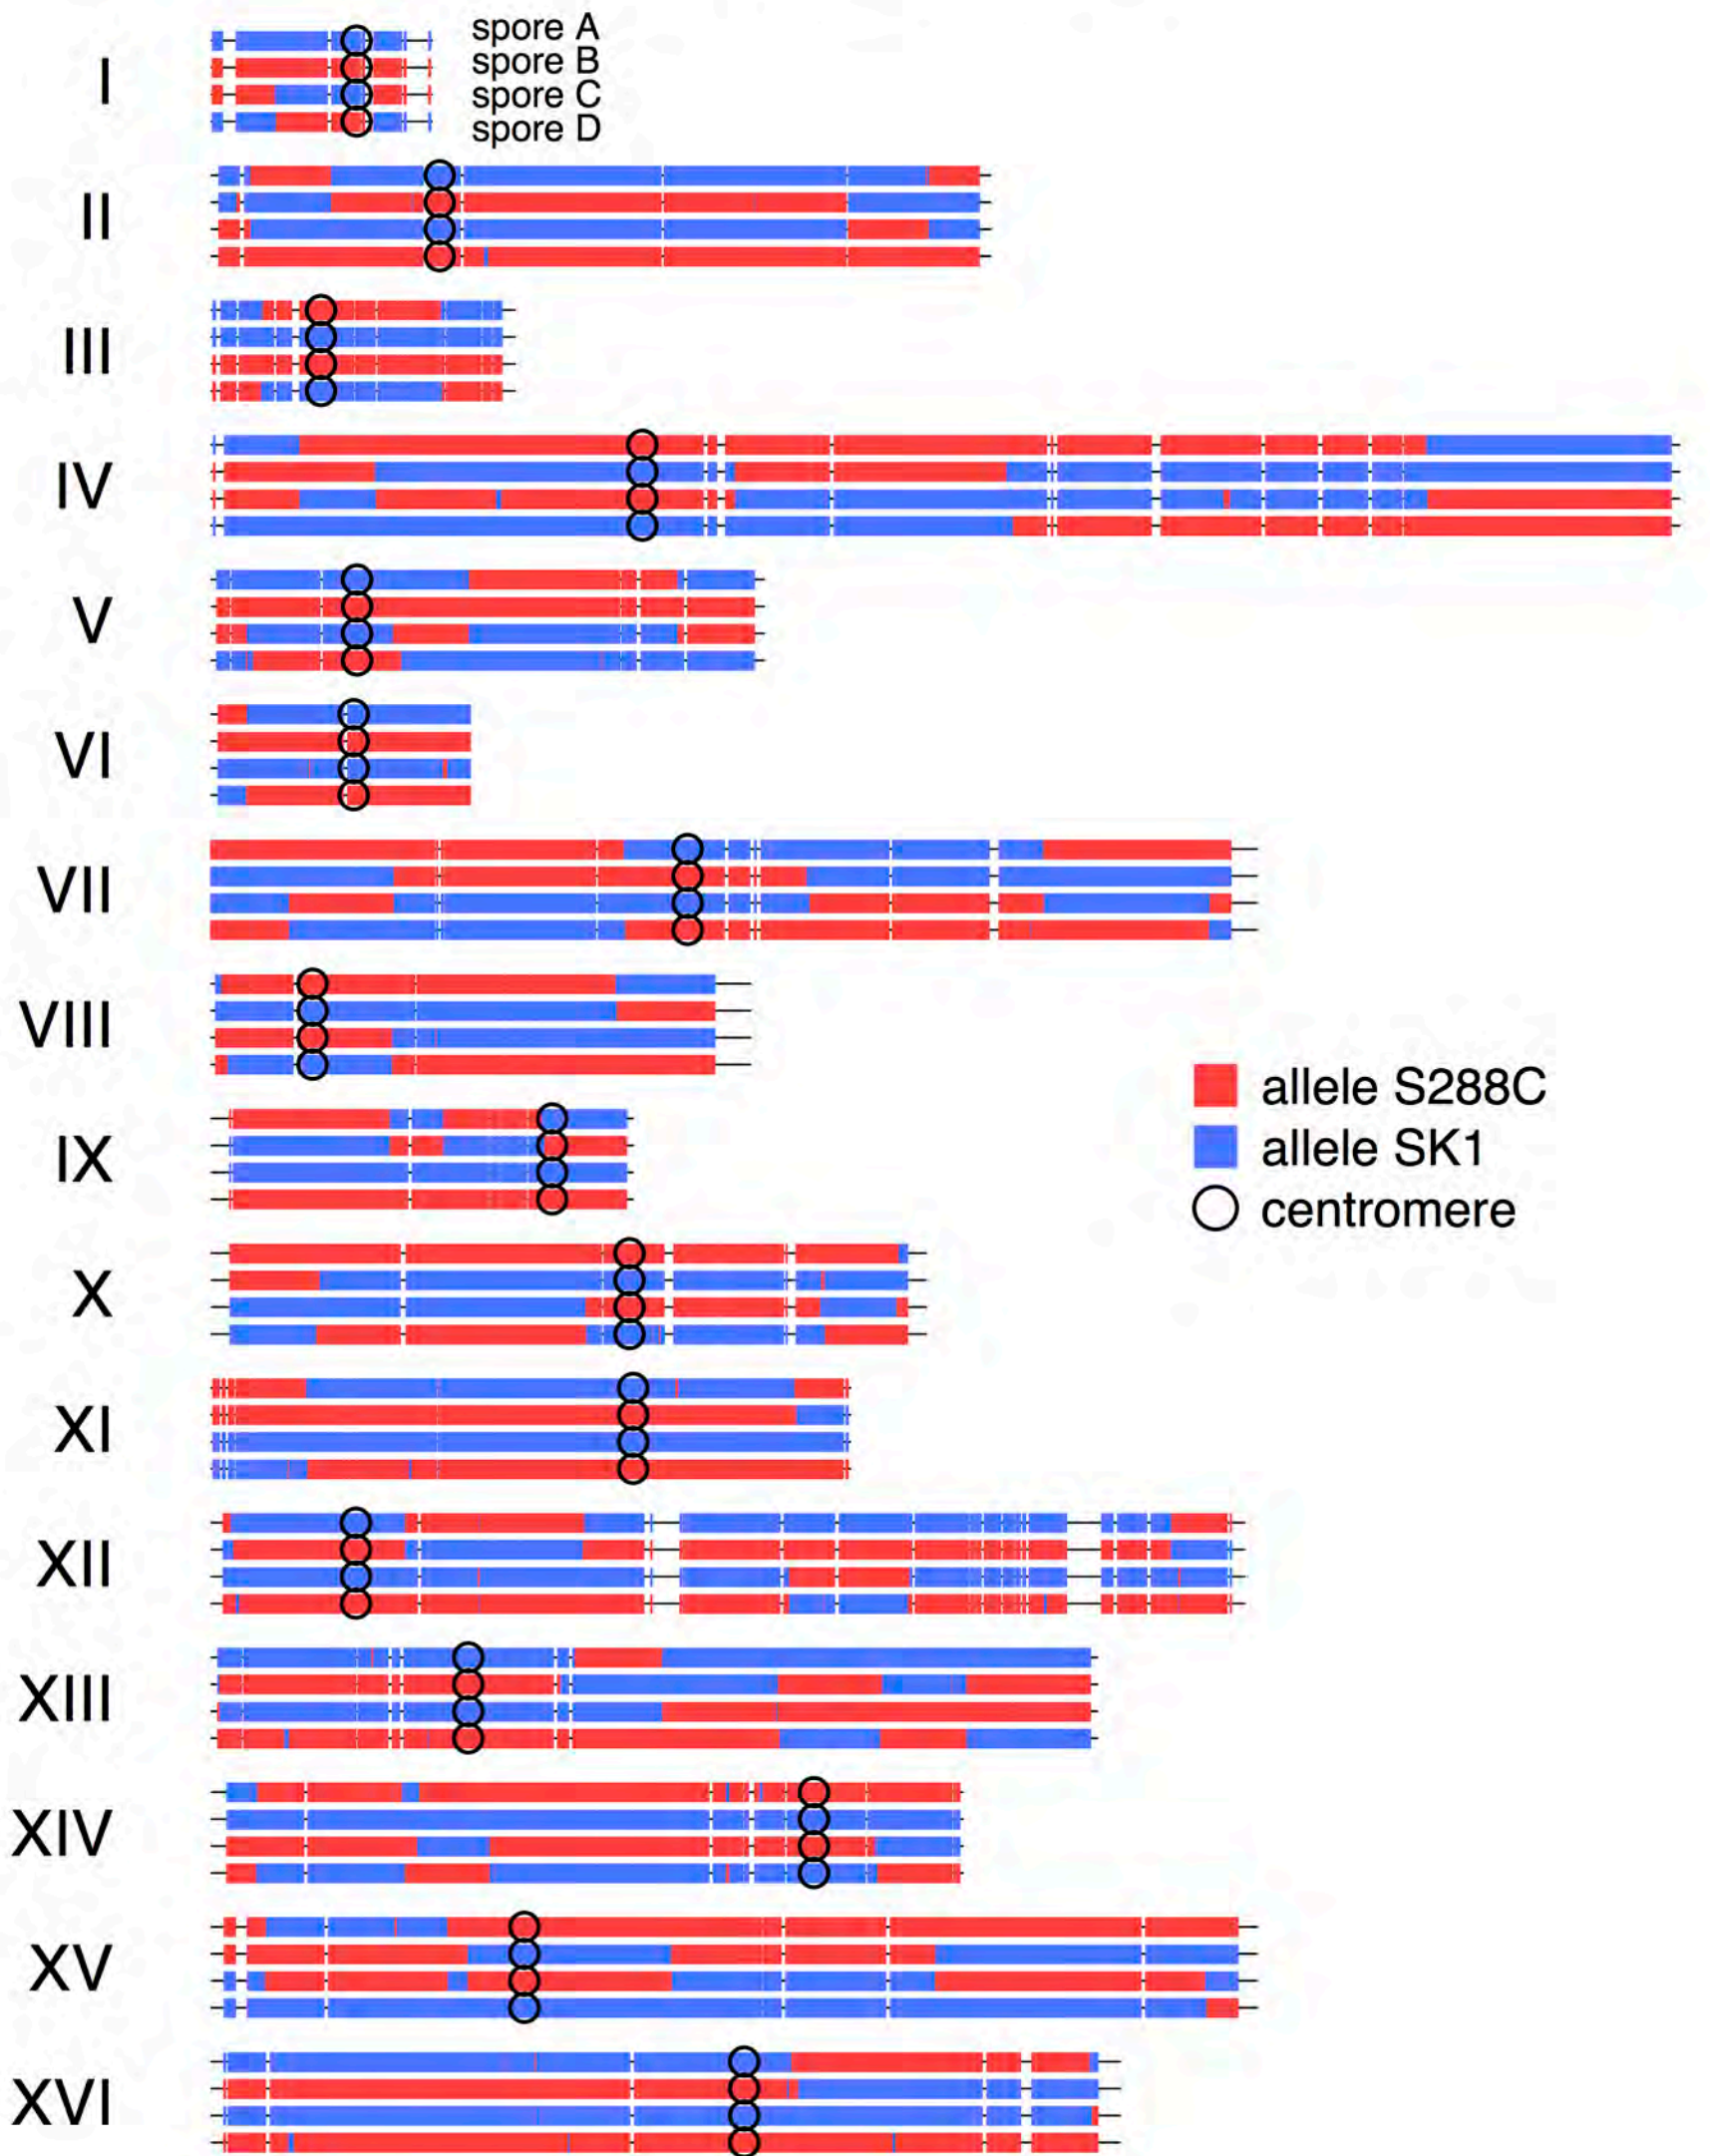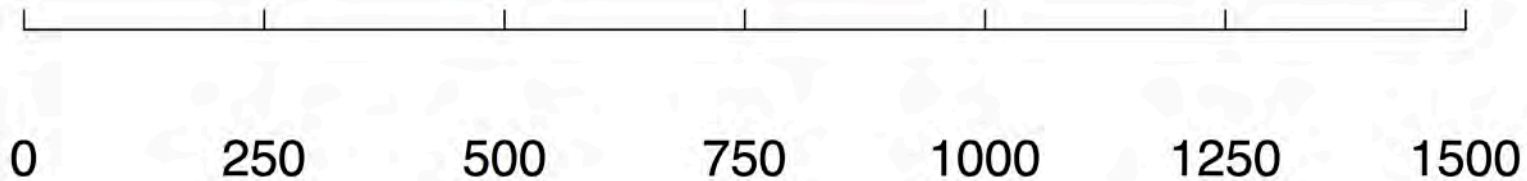

# WT\_tetrad\_7

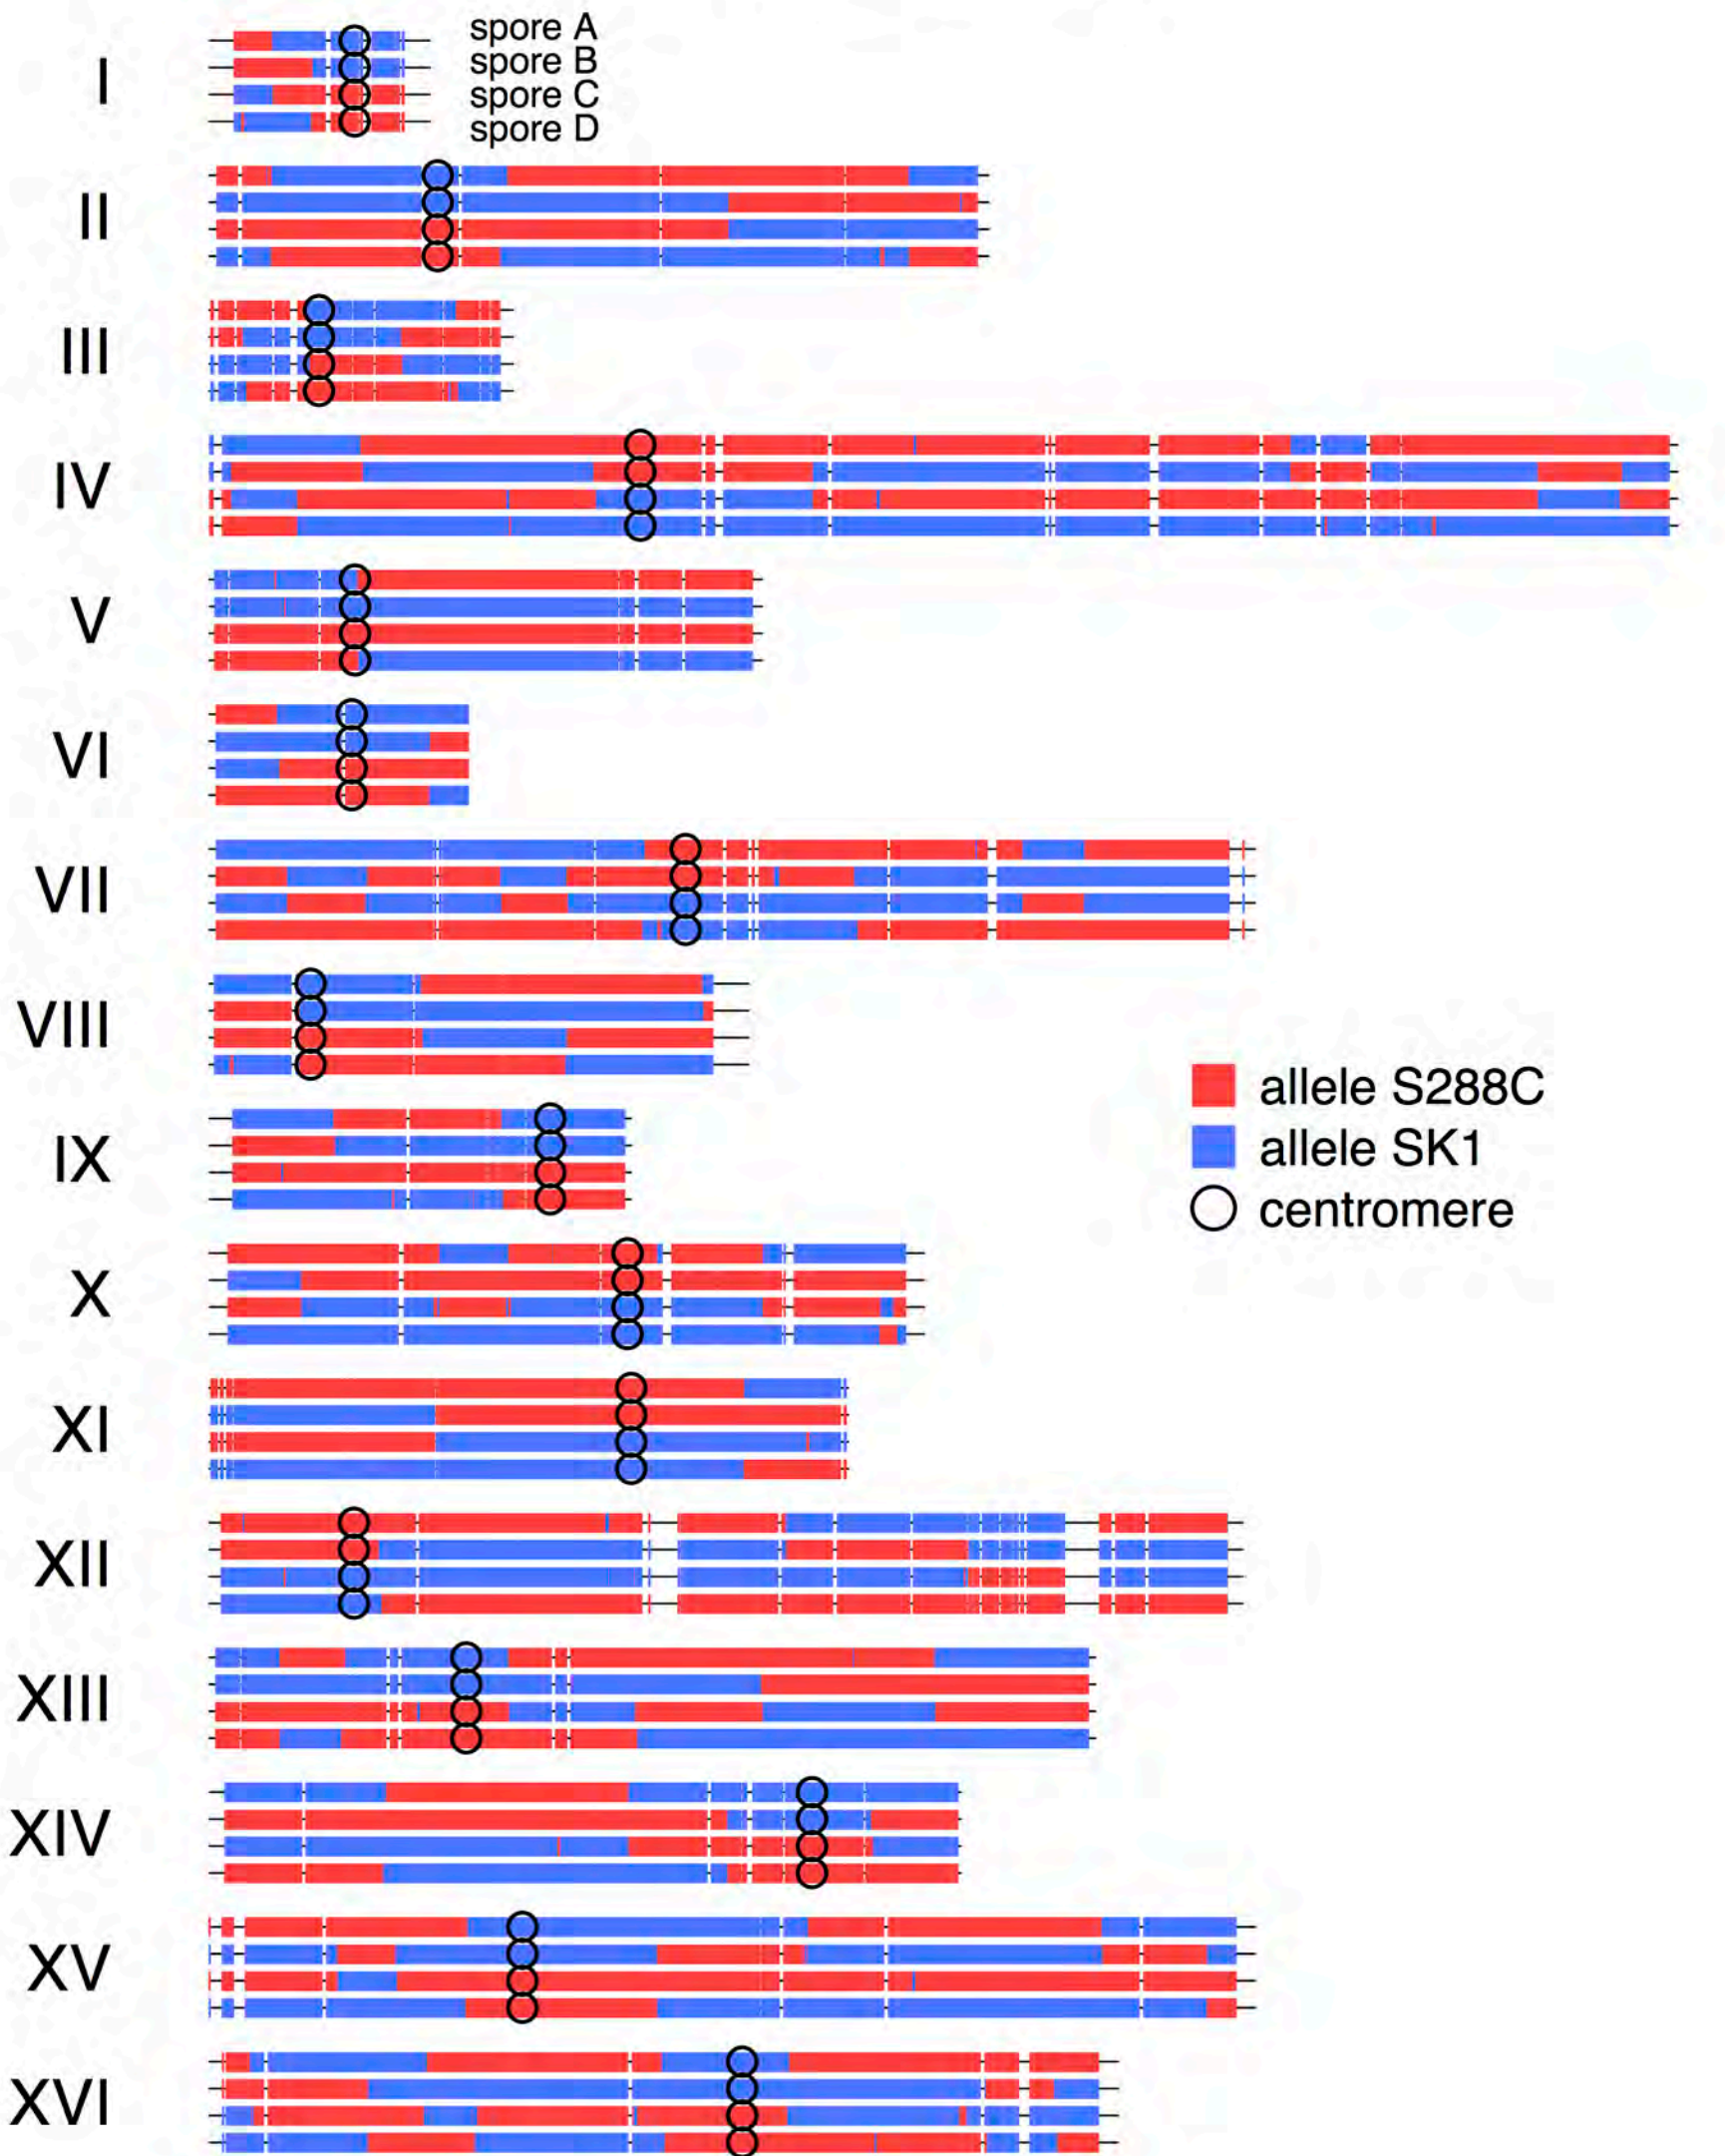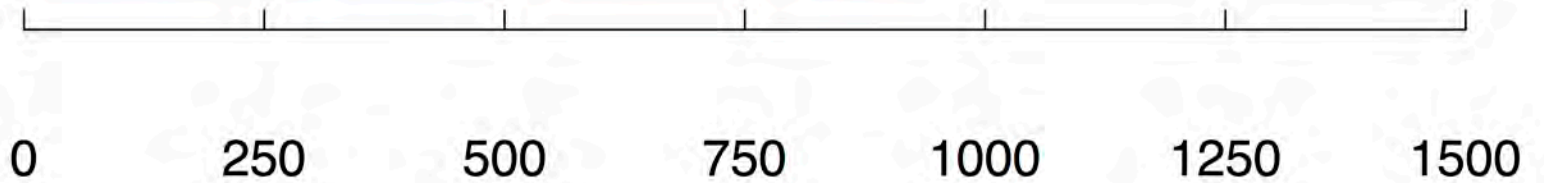

# WT\_tetrad\_8

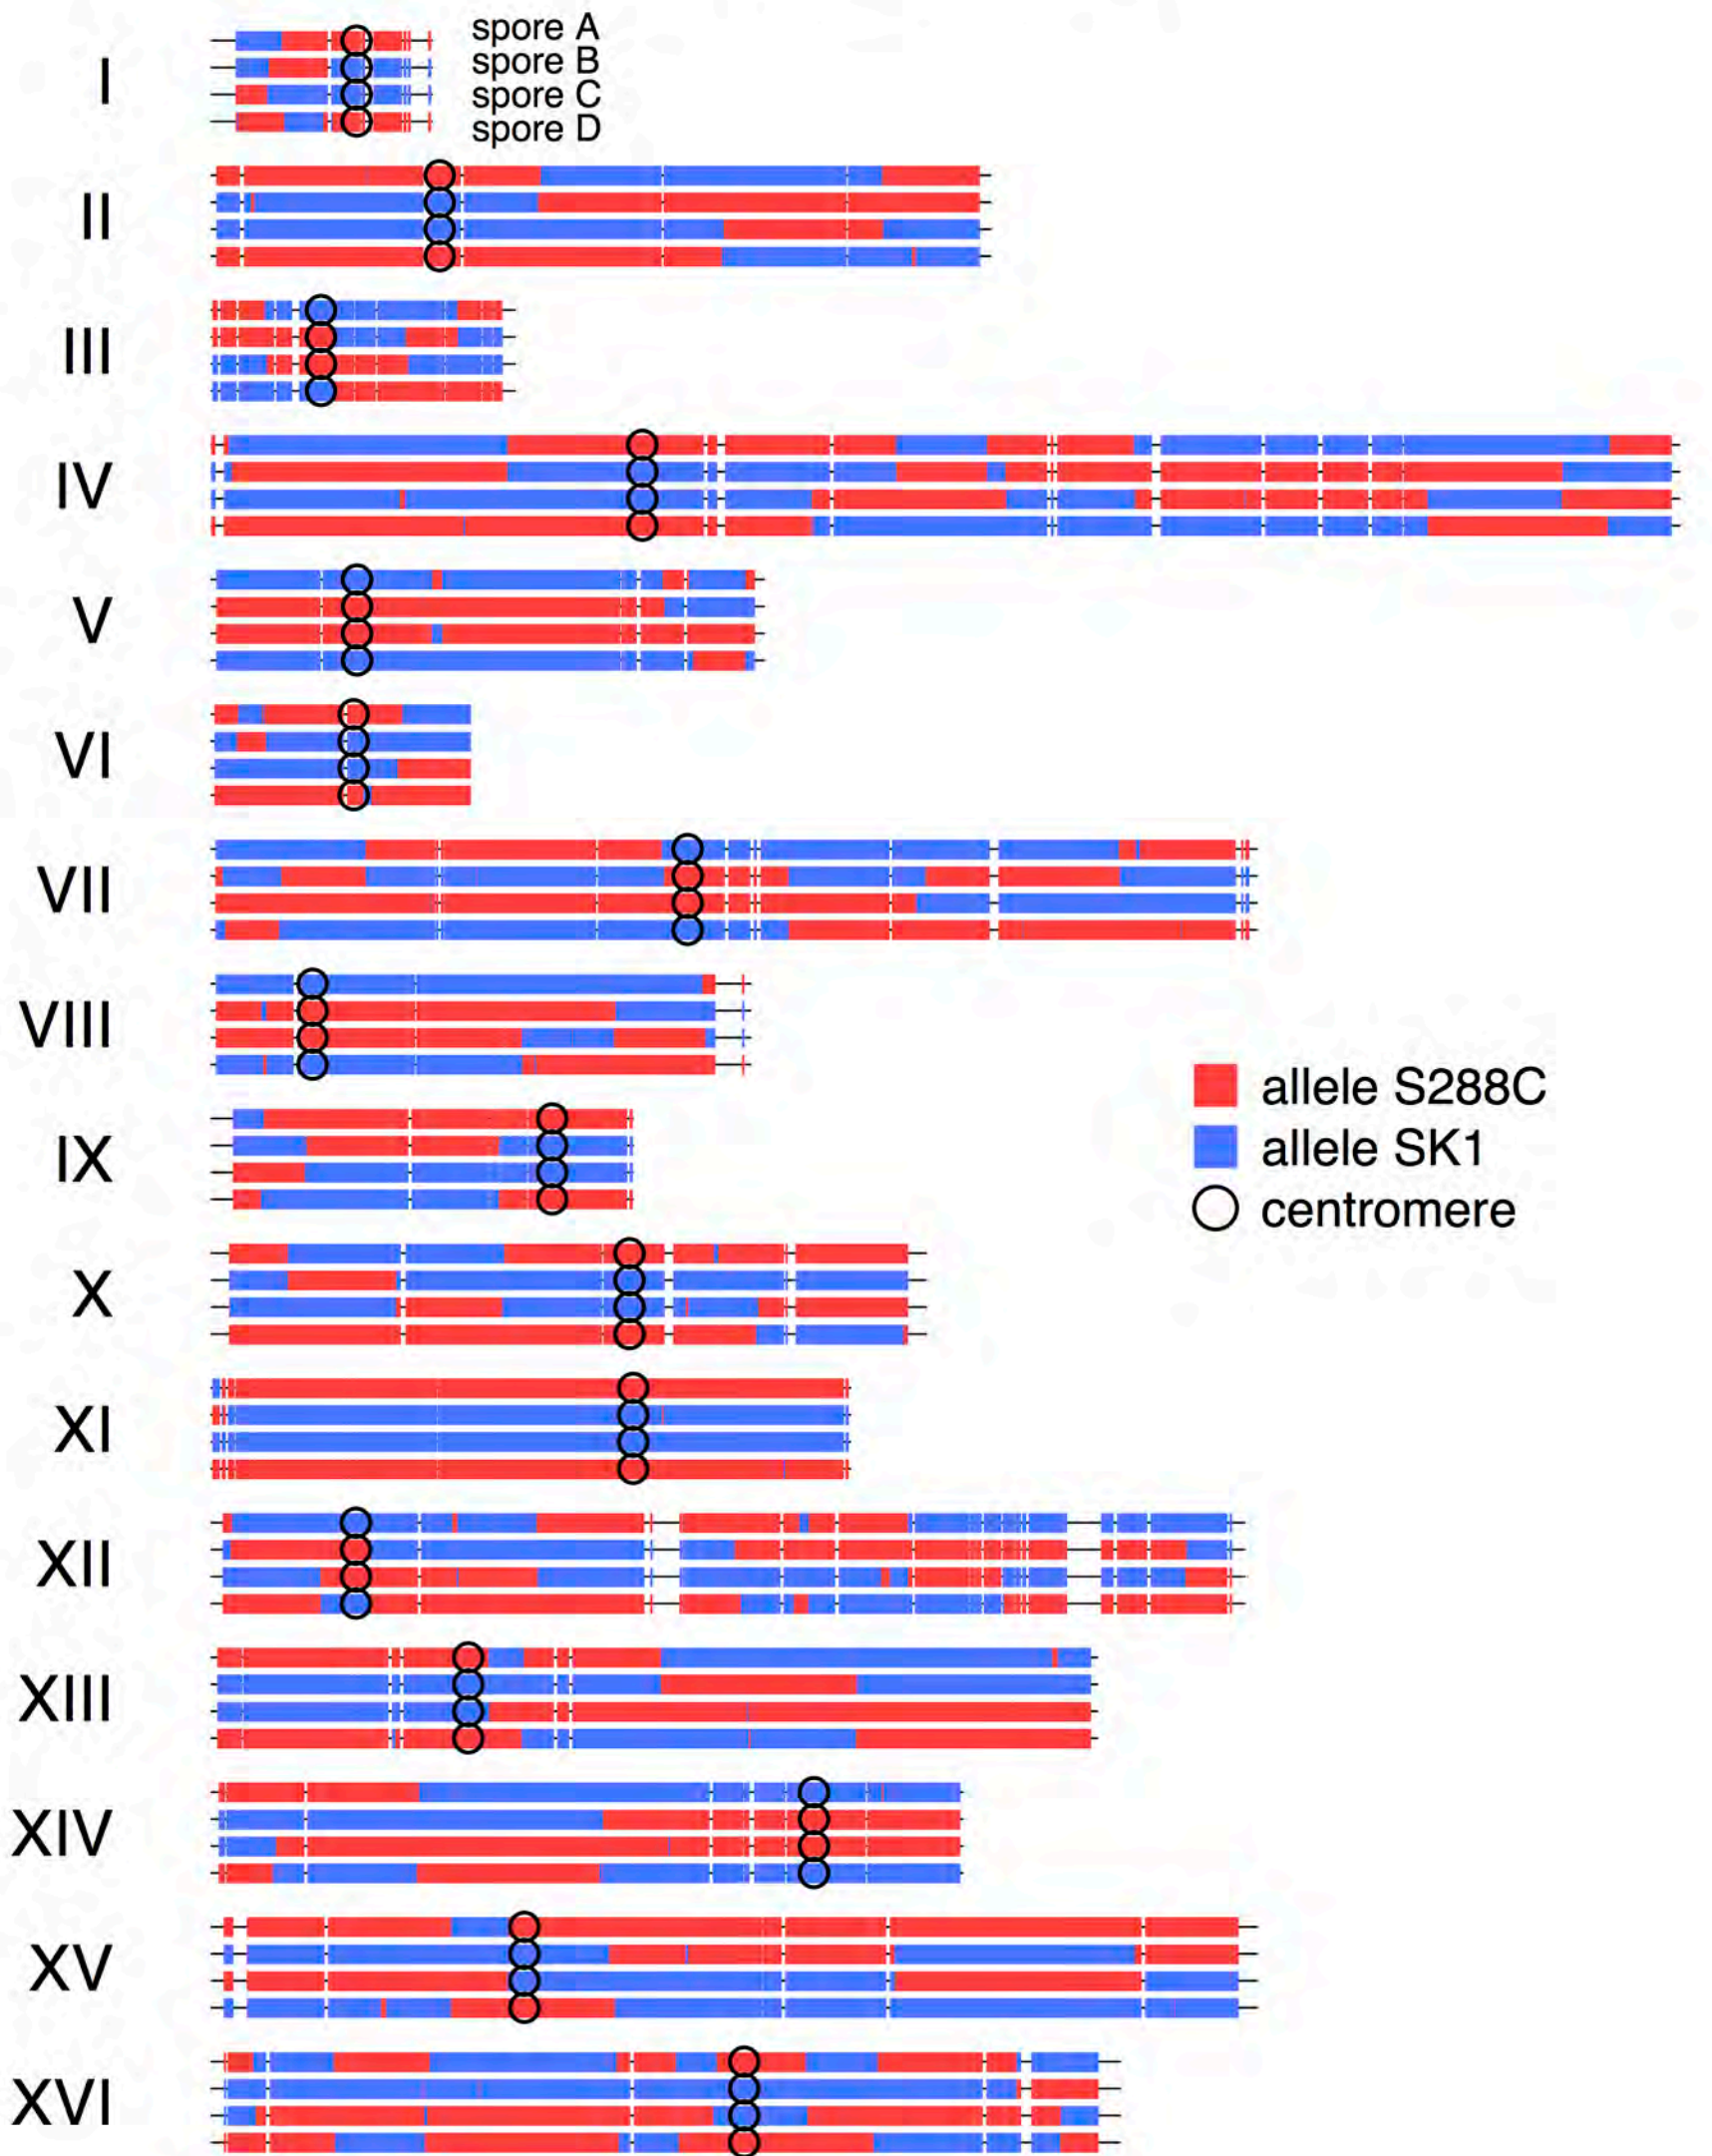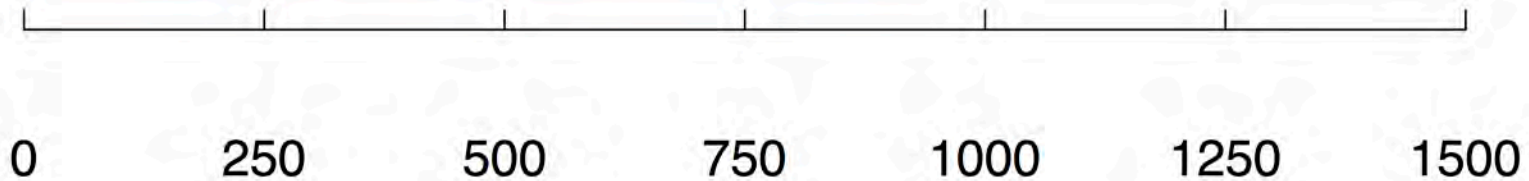



# WT\_tetrad\_9

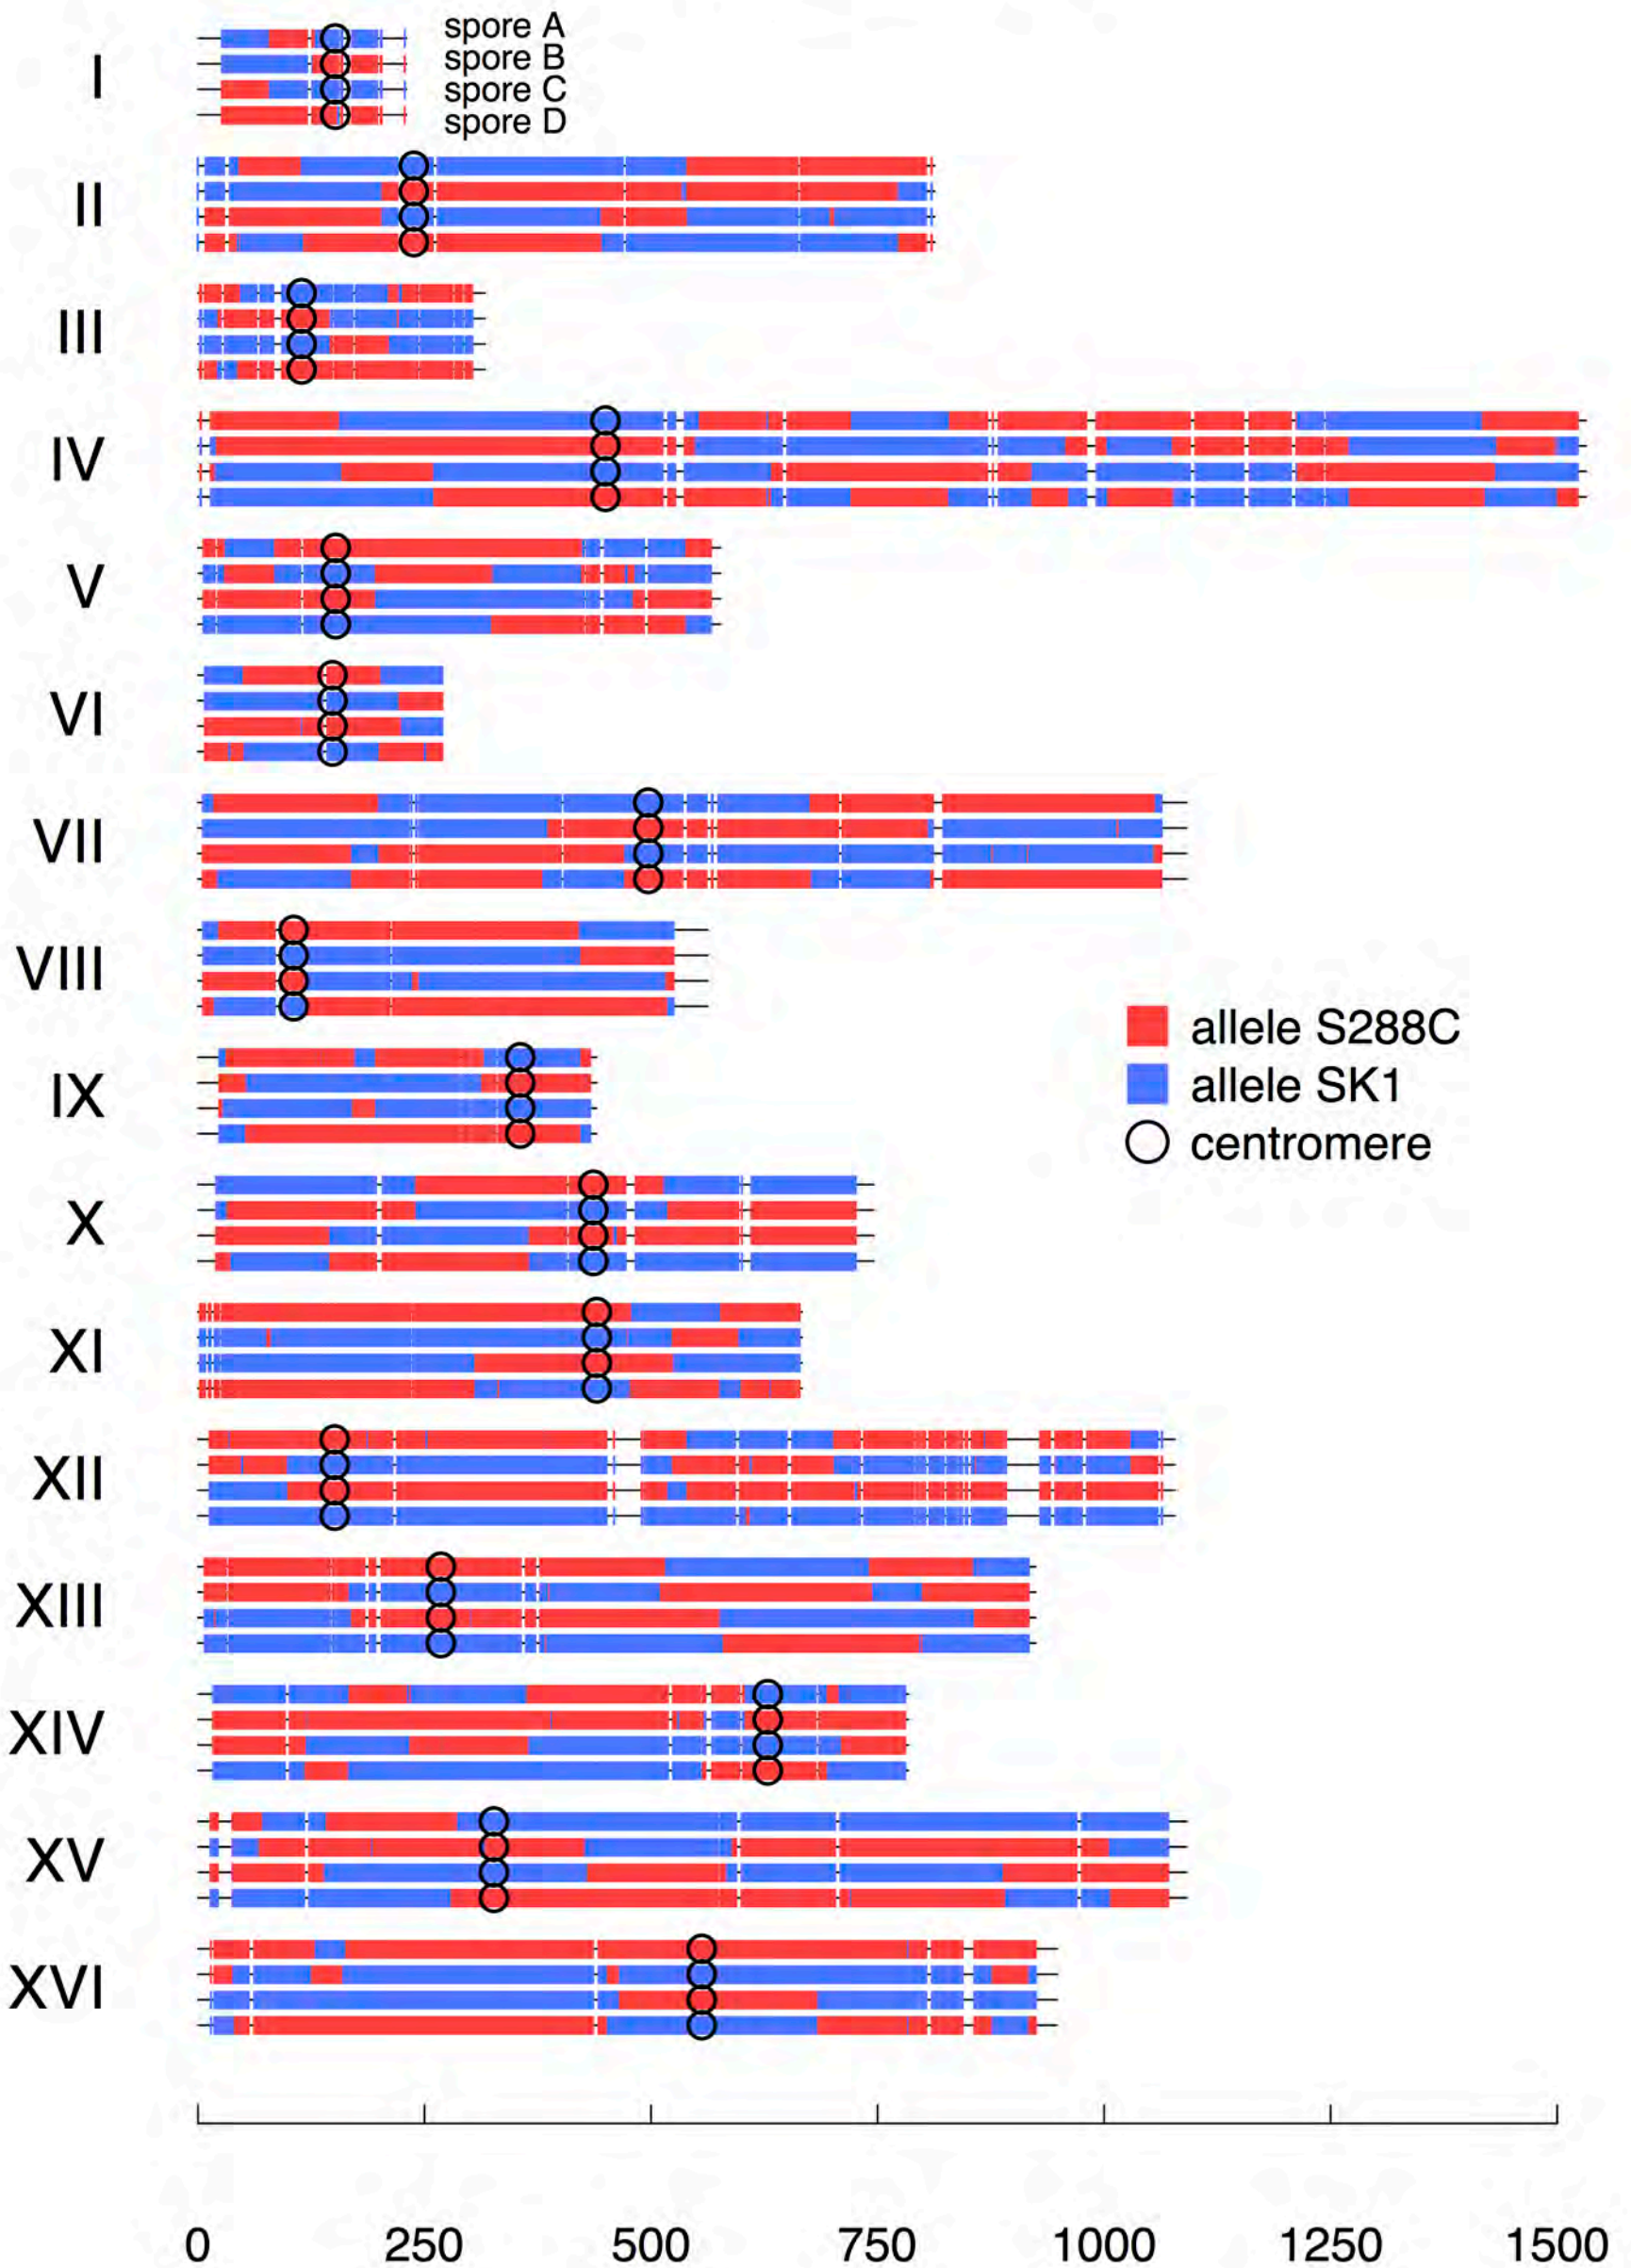

# WT\_tetrad\_10

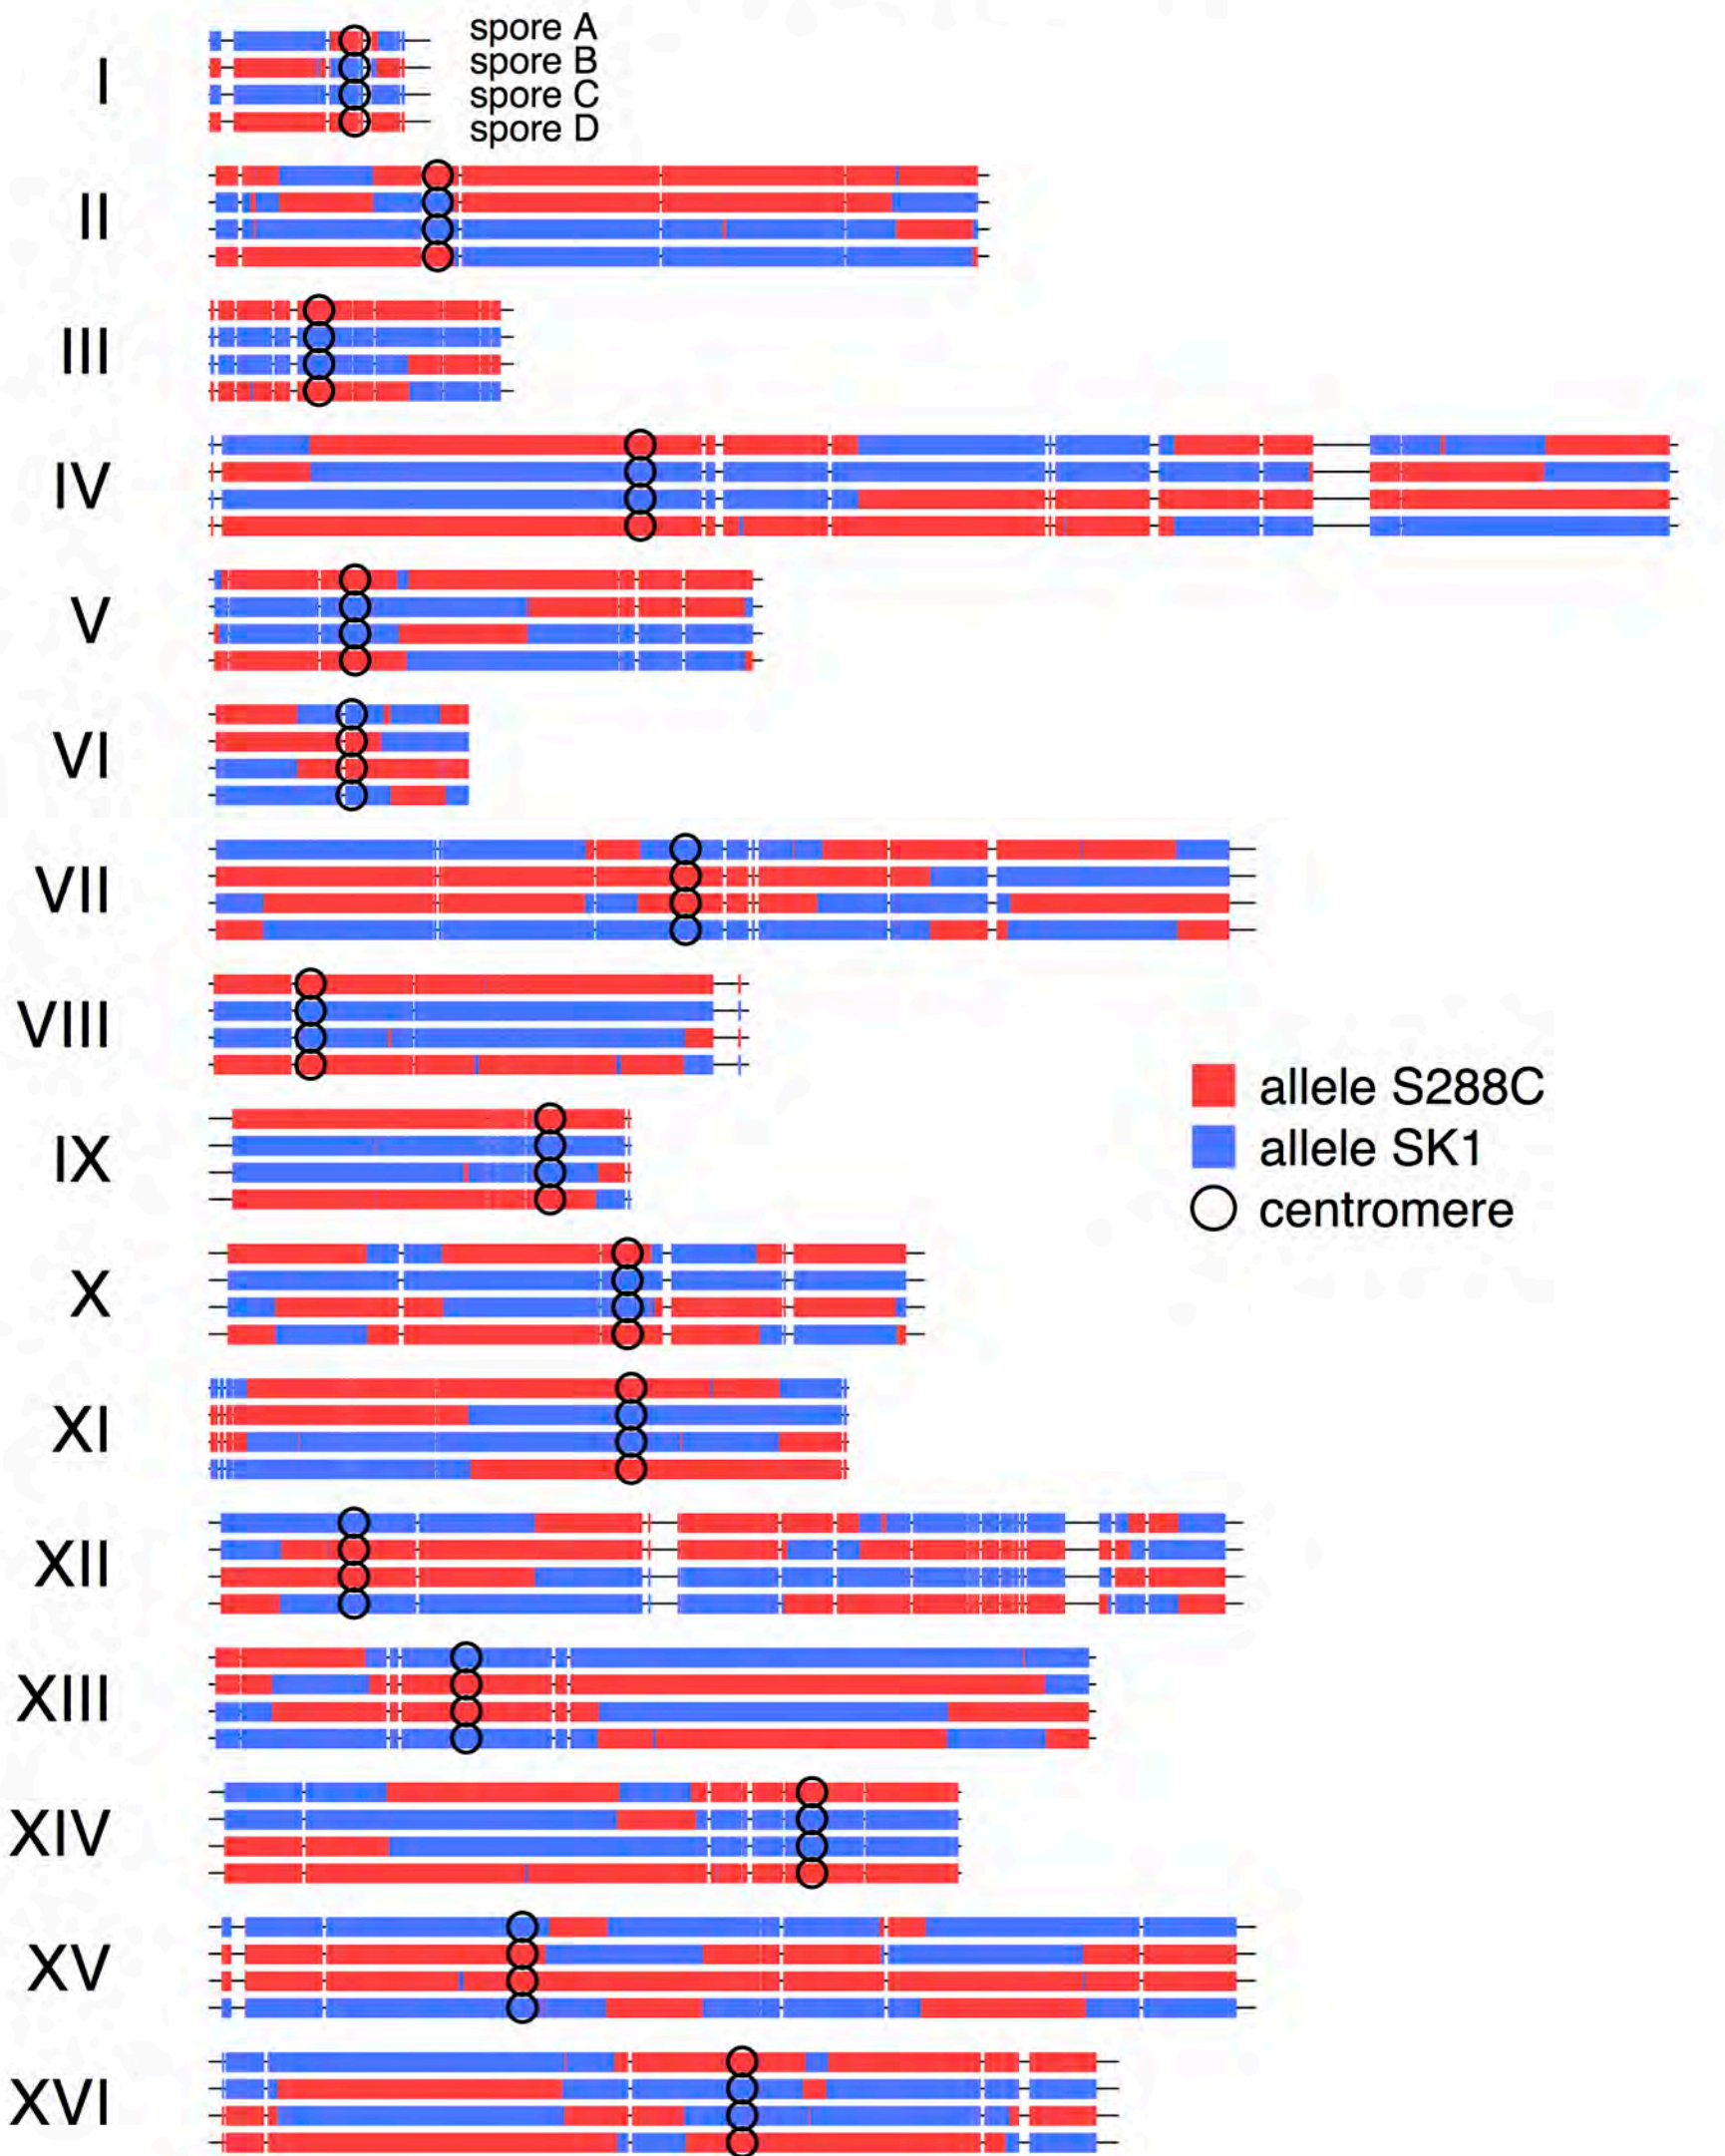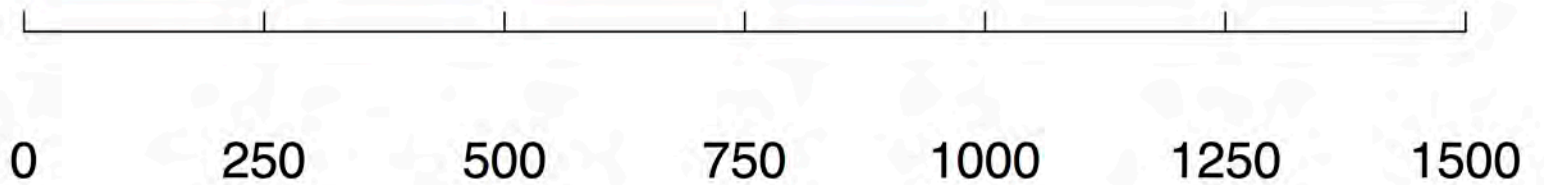

# WT\_tetrad\_11

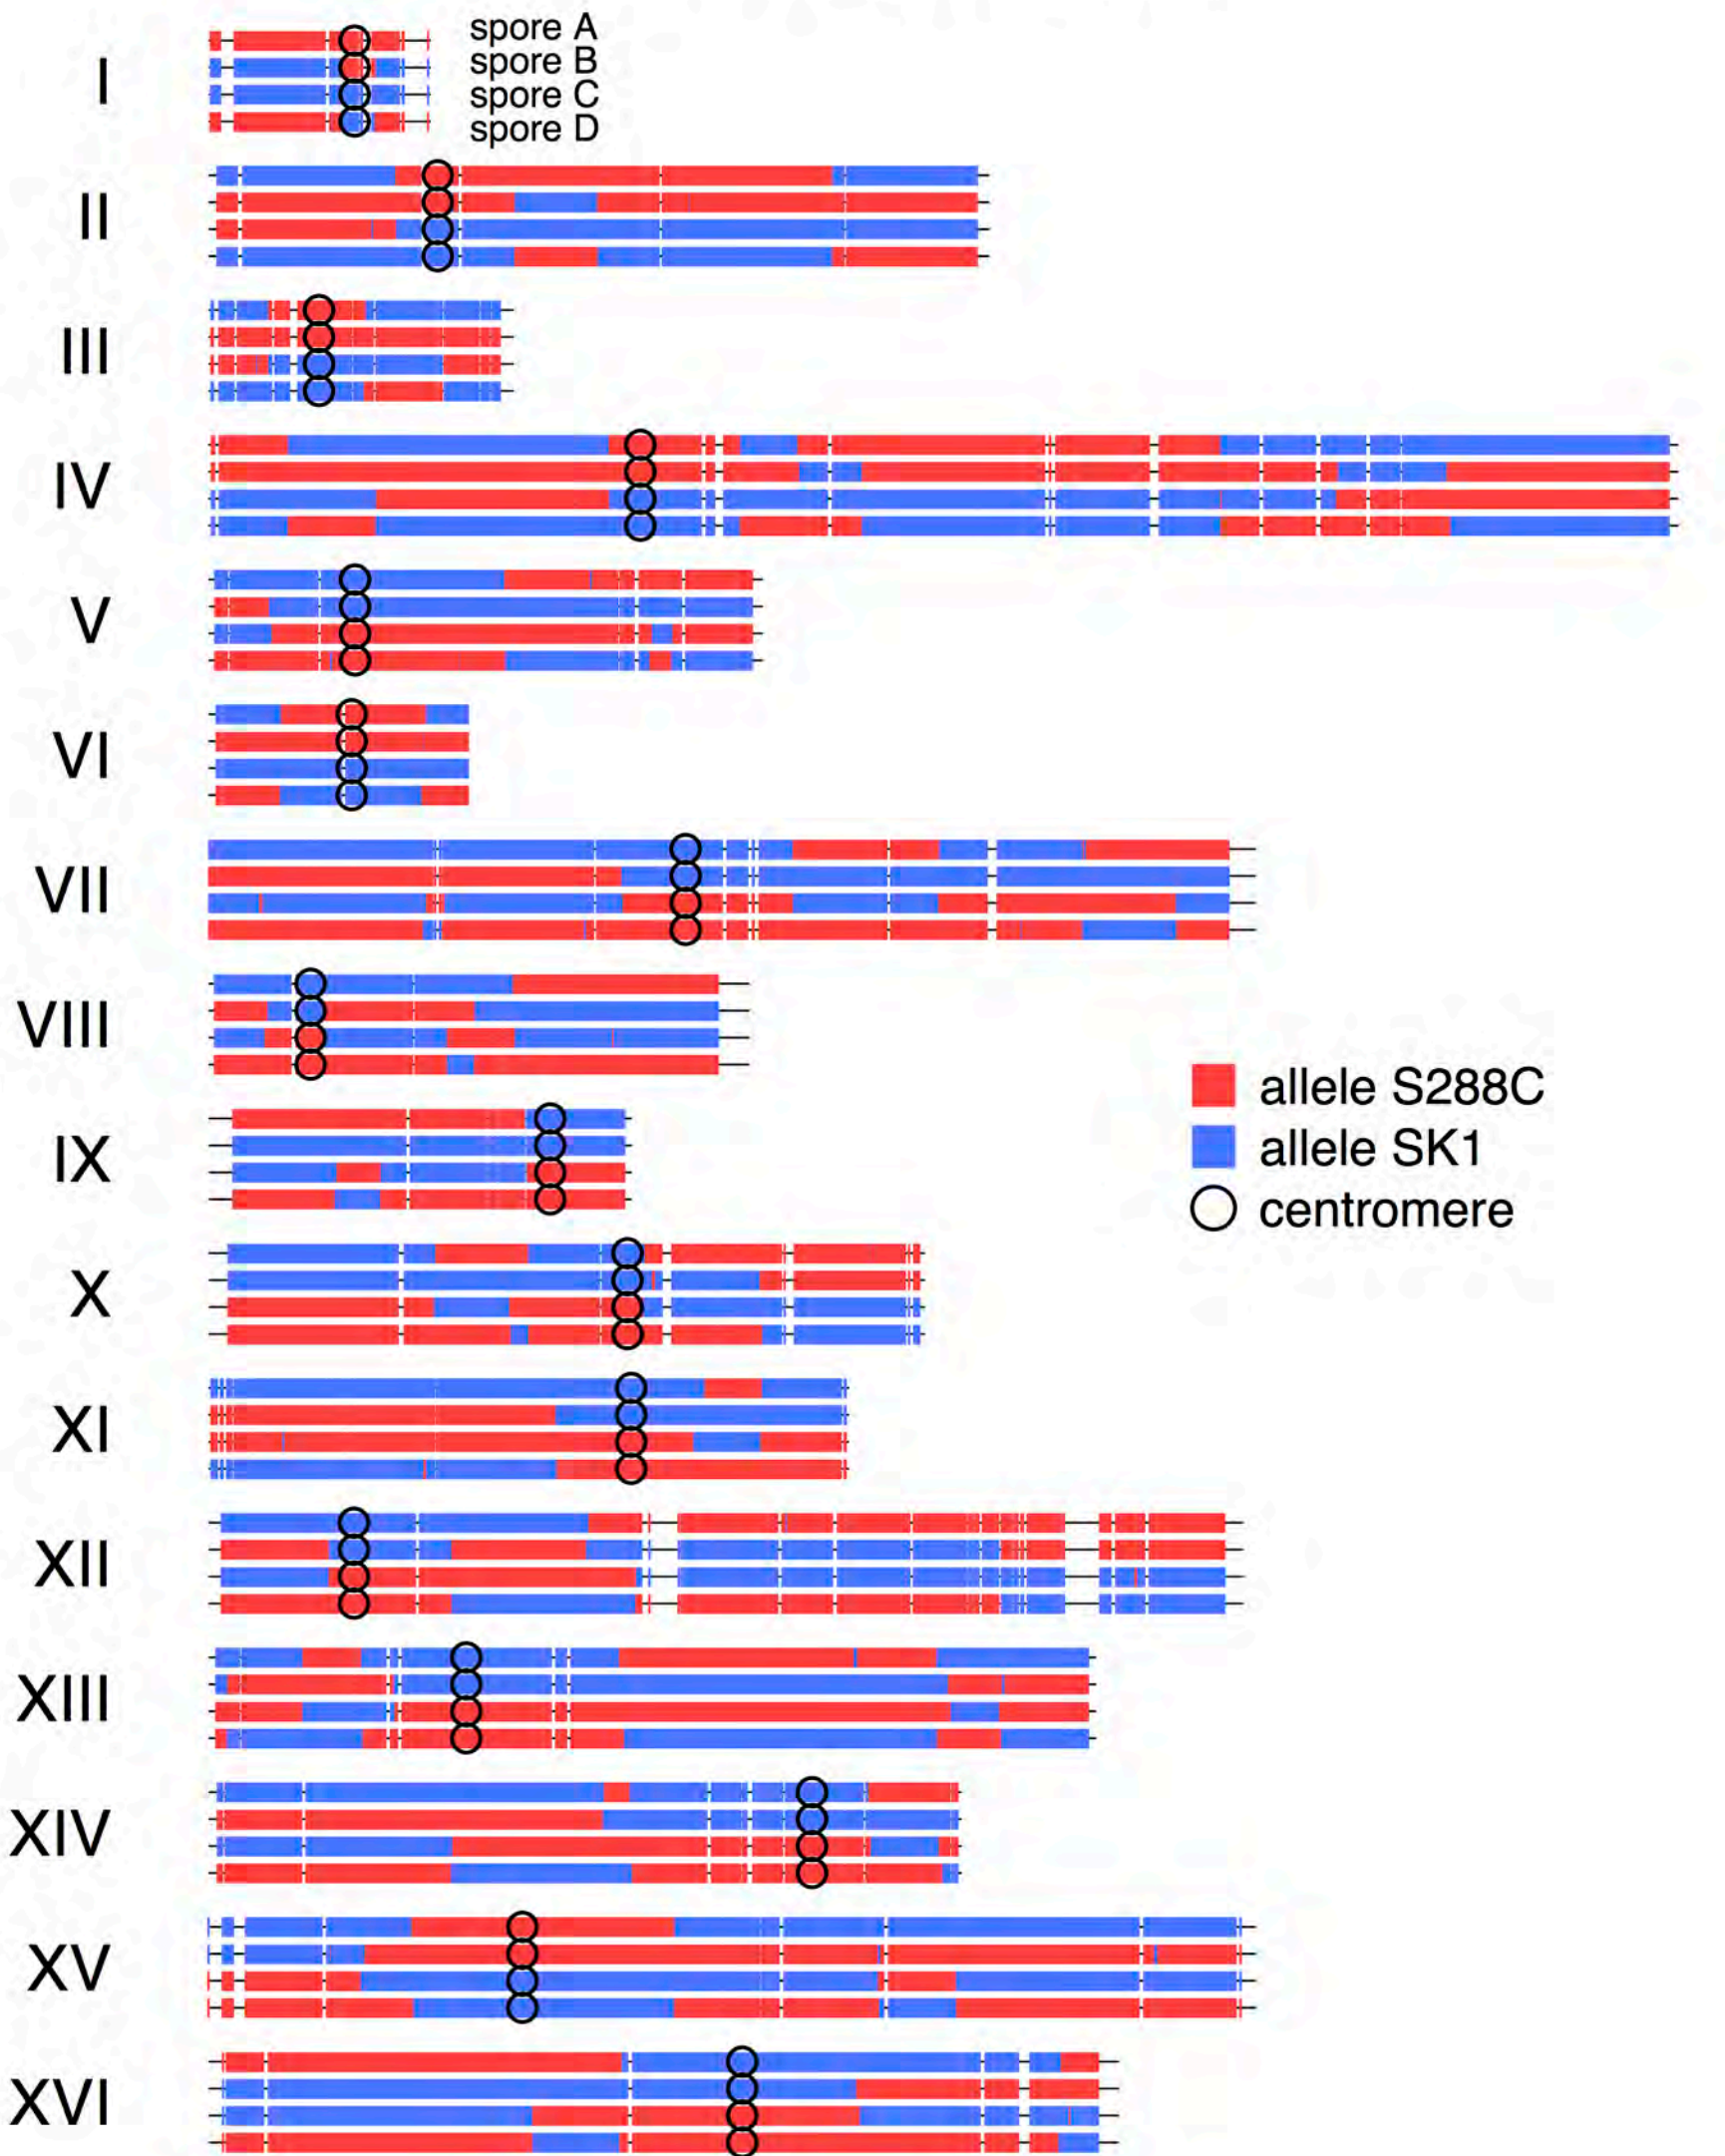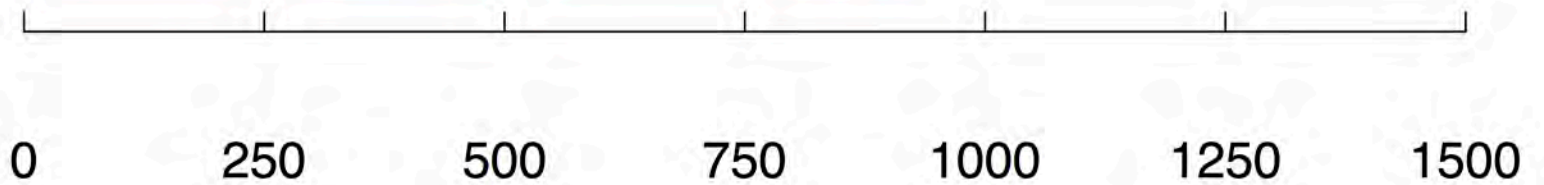

# WT\_tetrad\_12

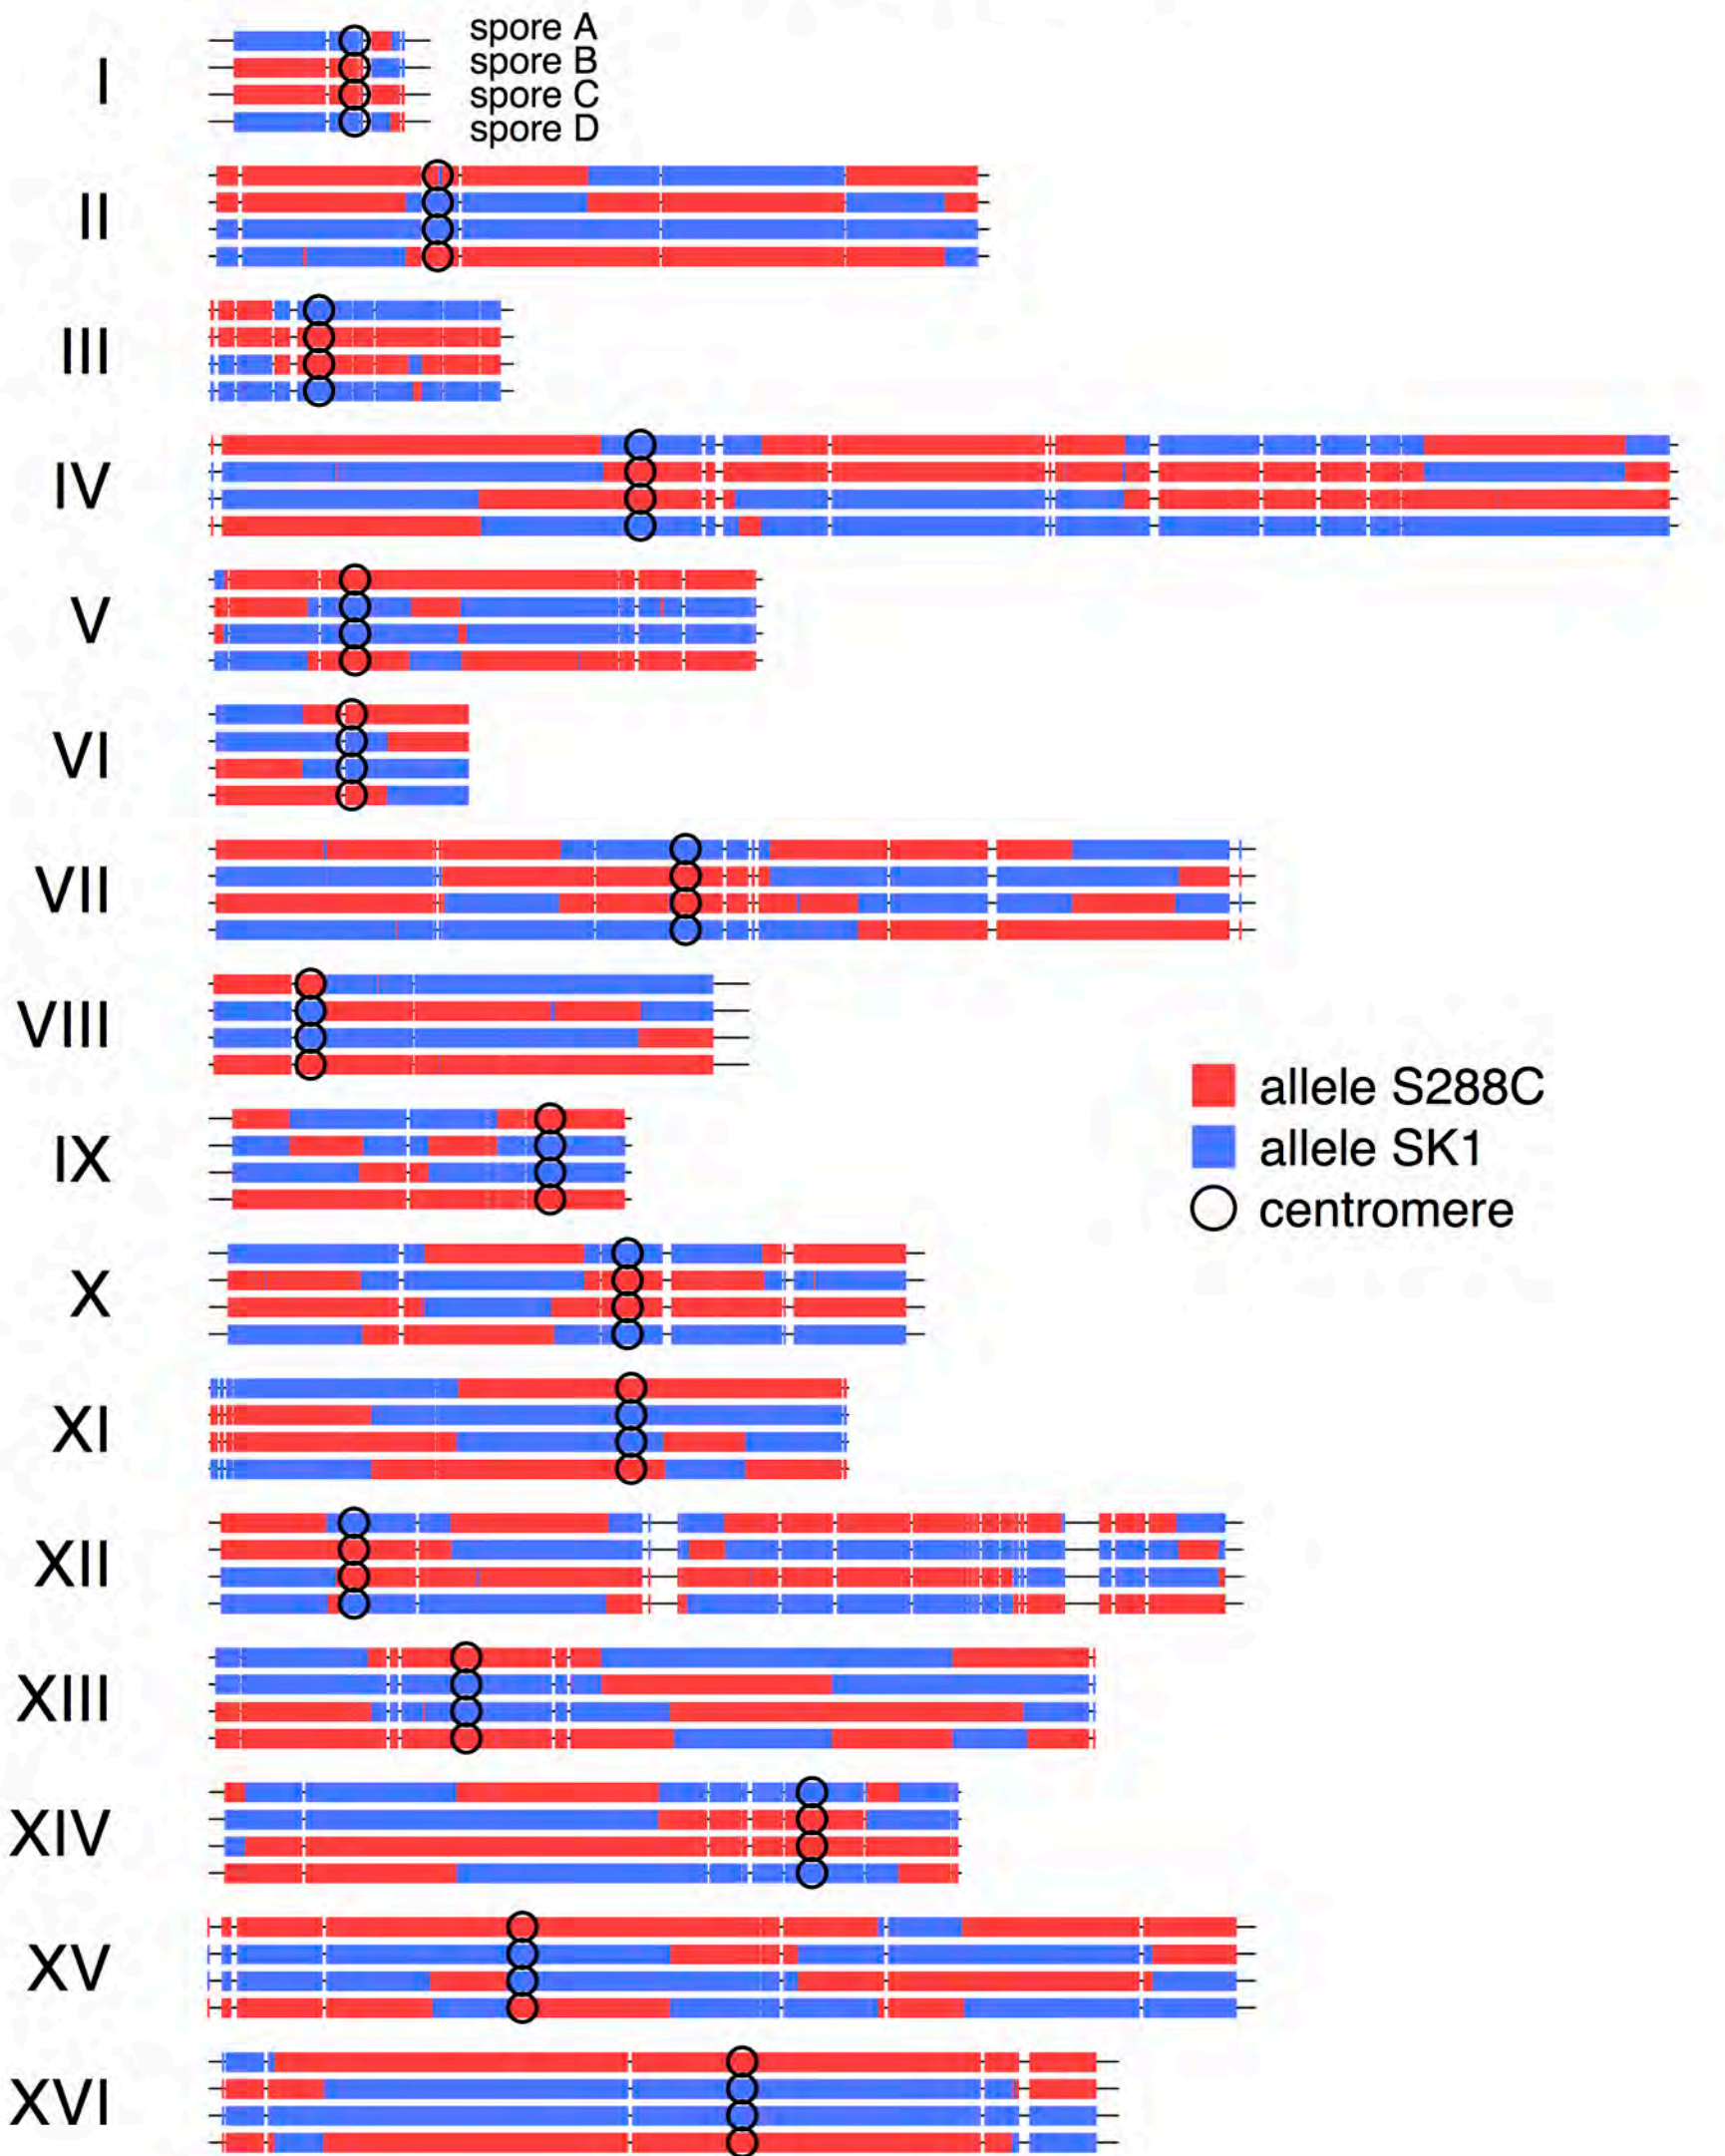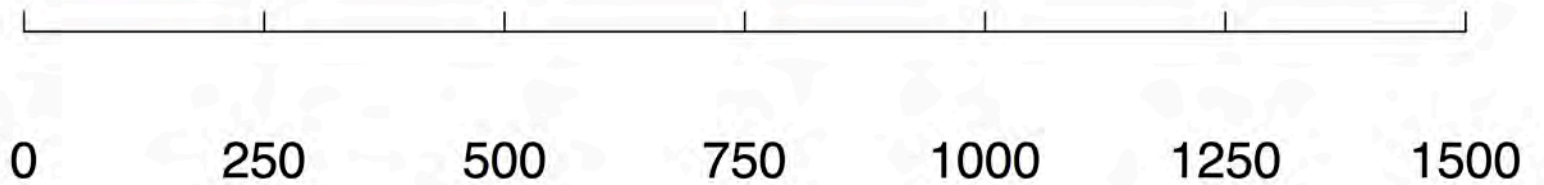

# WT\_tetrad\_13

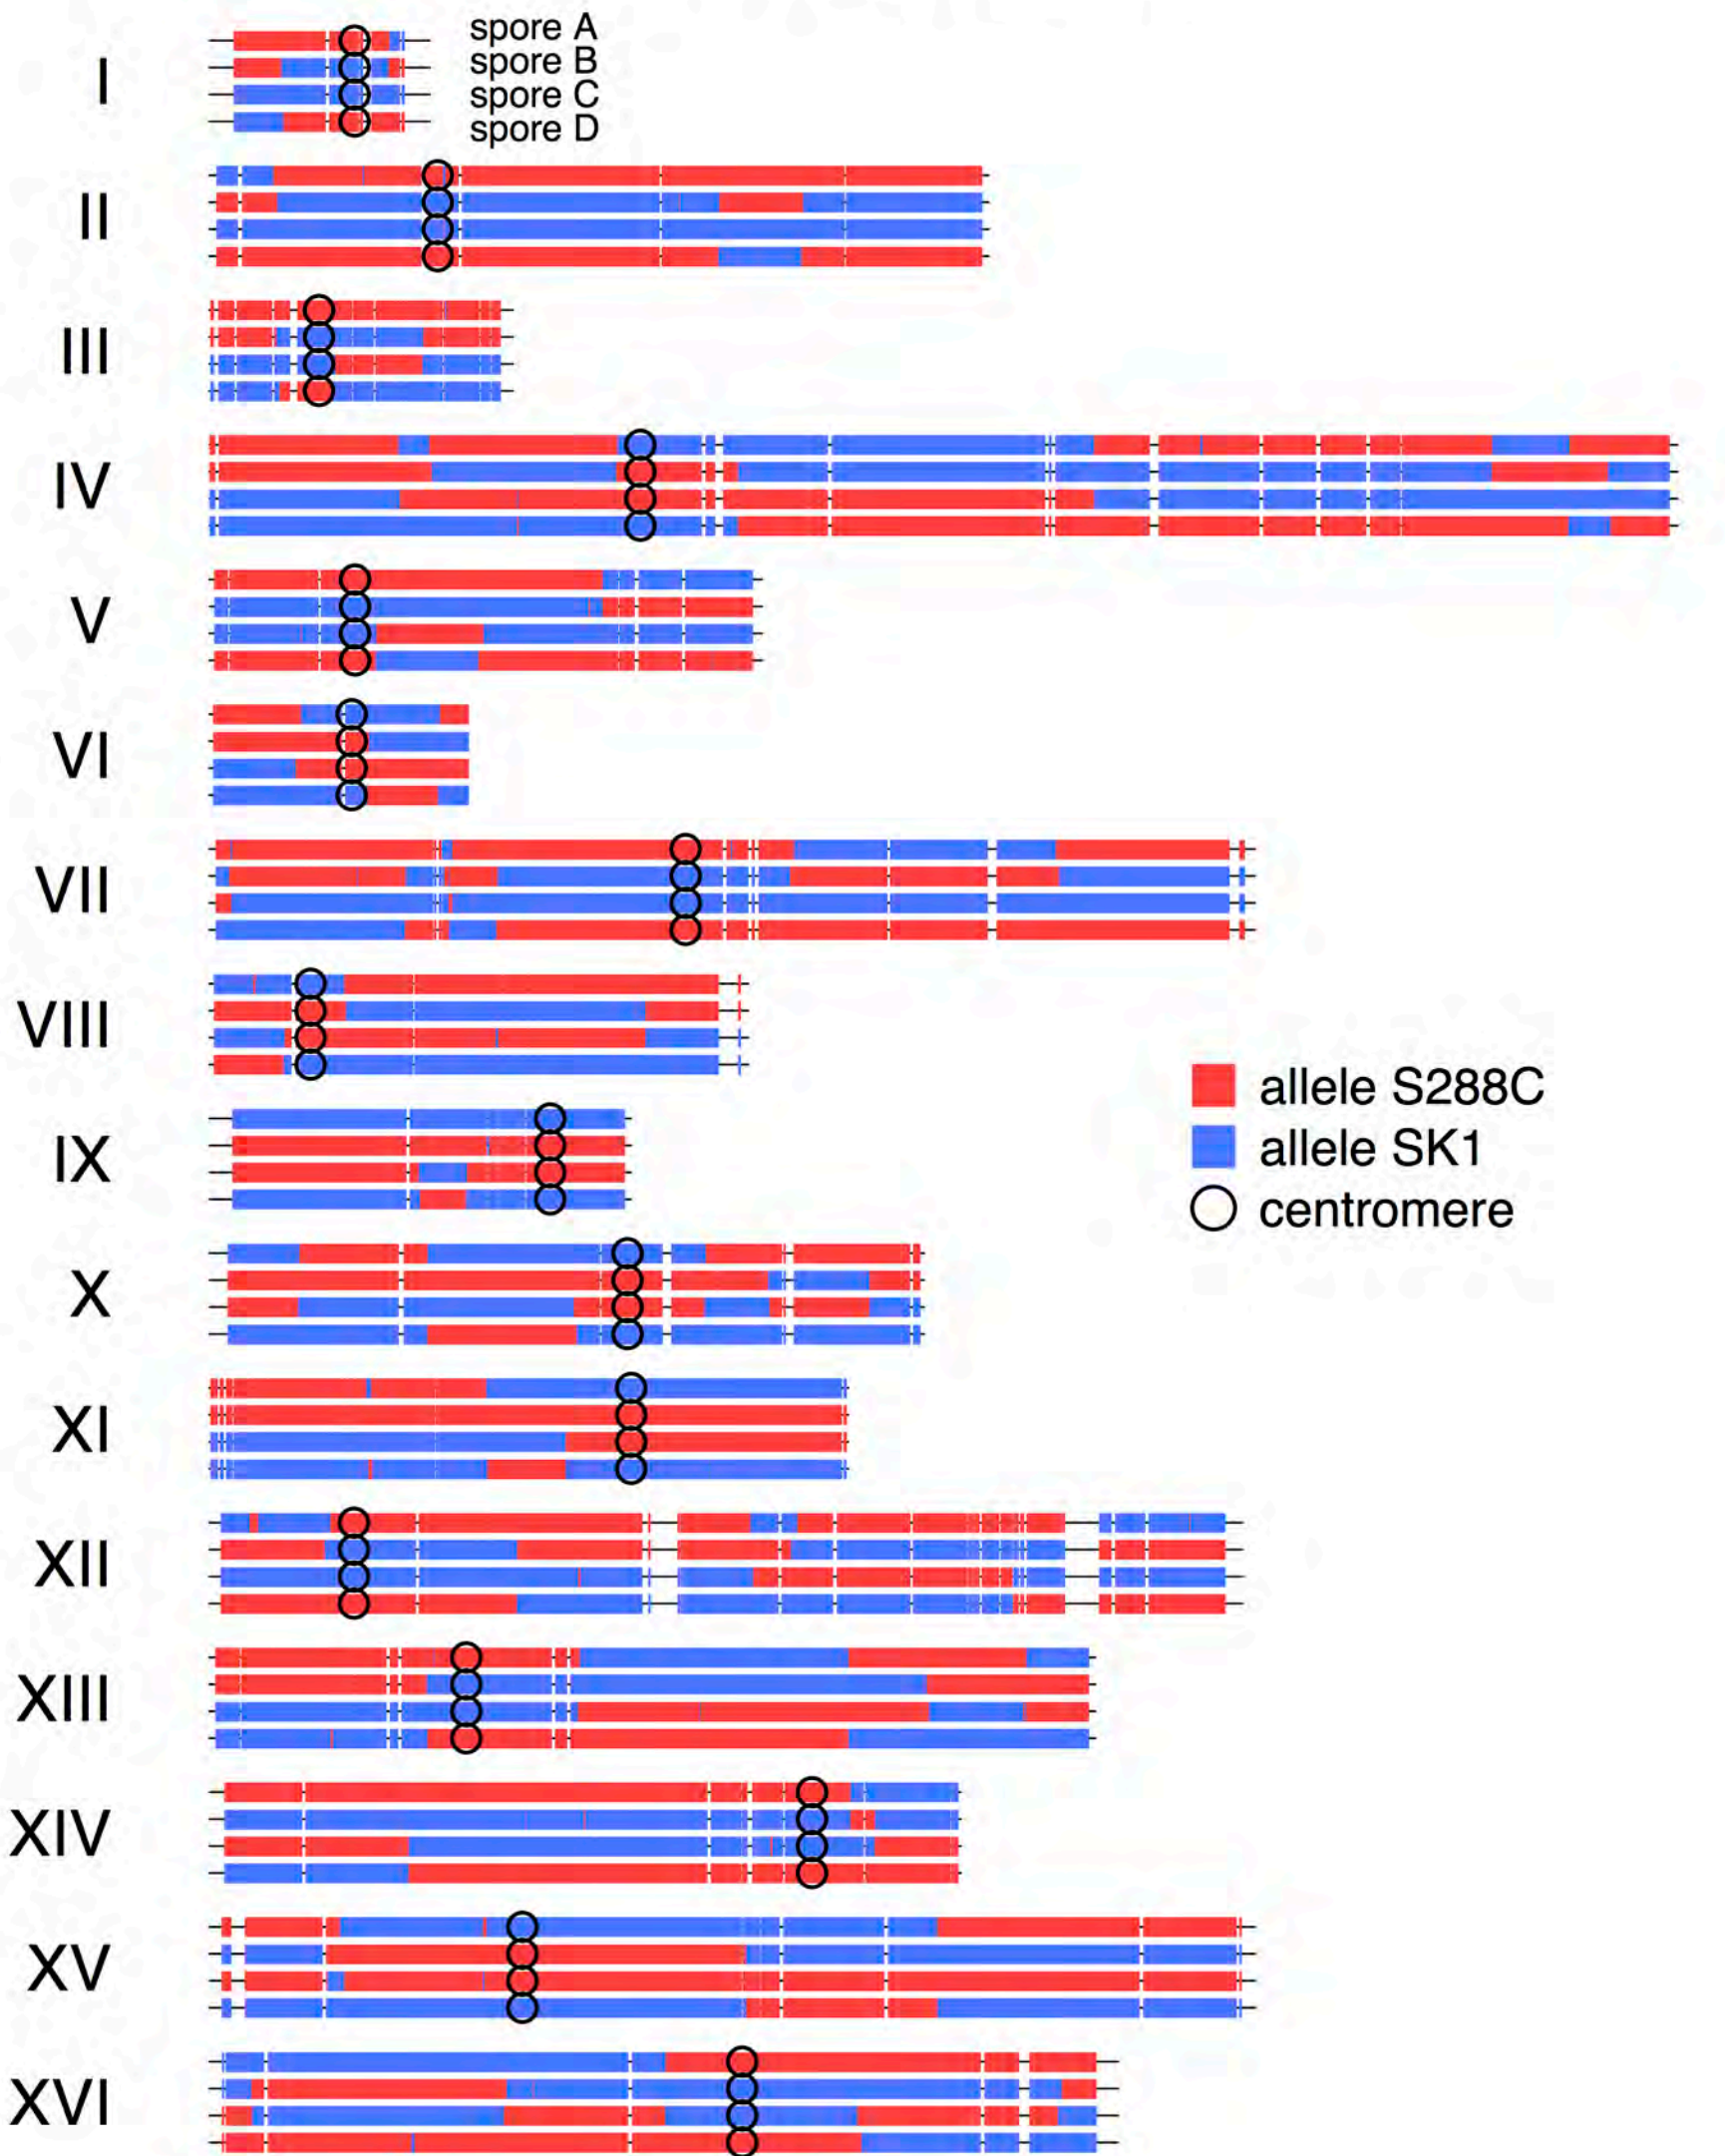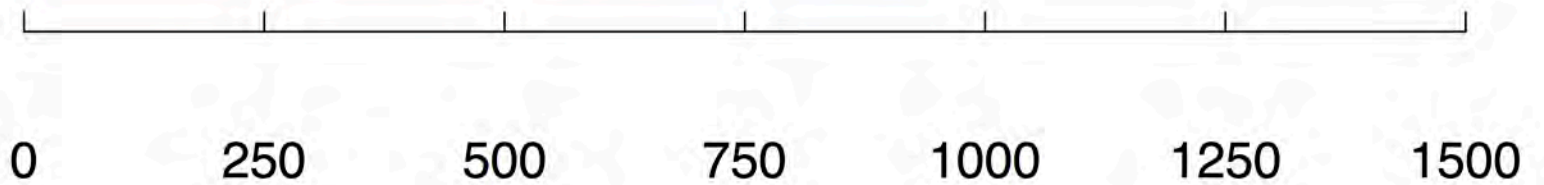

# WT\_tetrad\_14

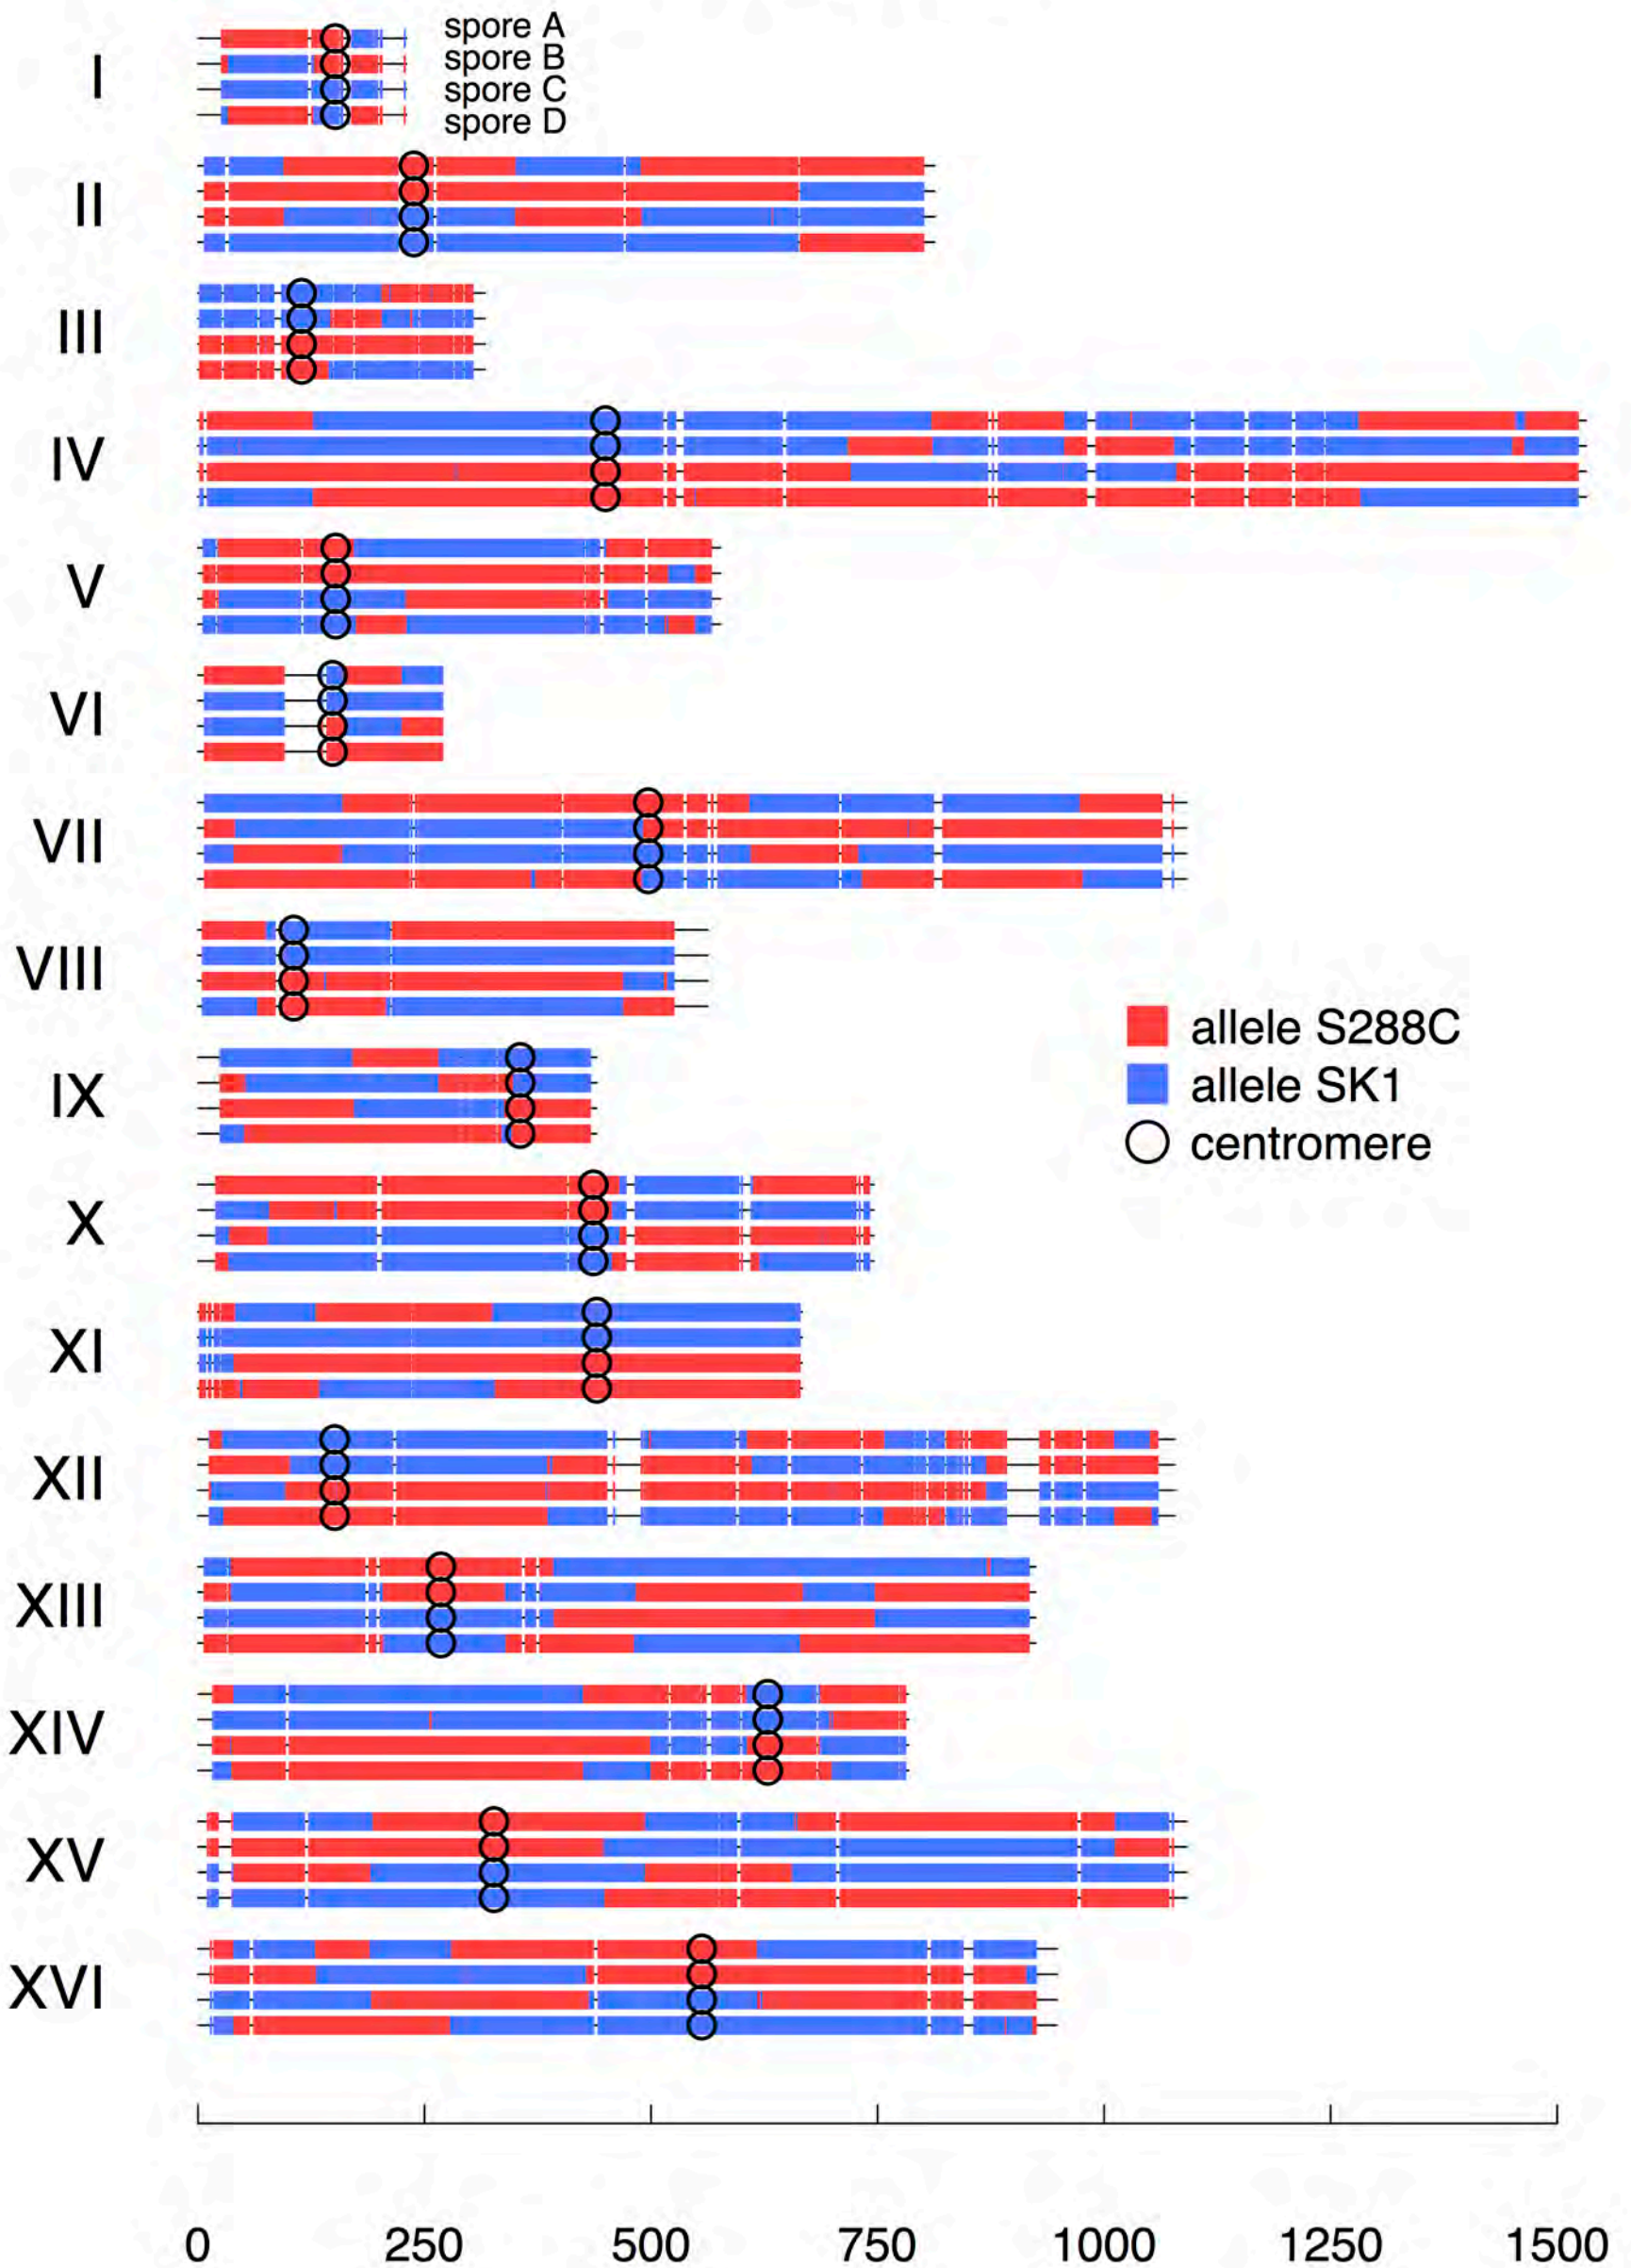

# WT\_tetrad\_15

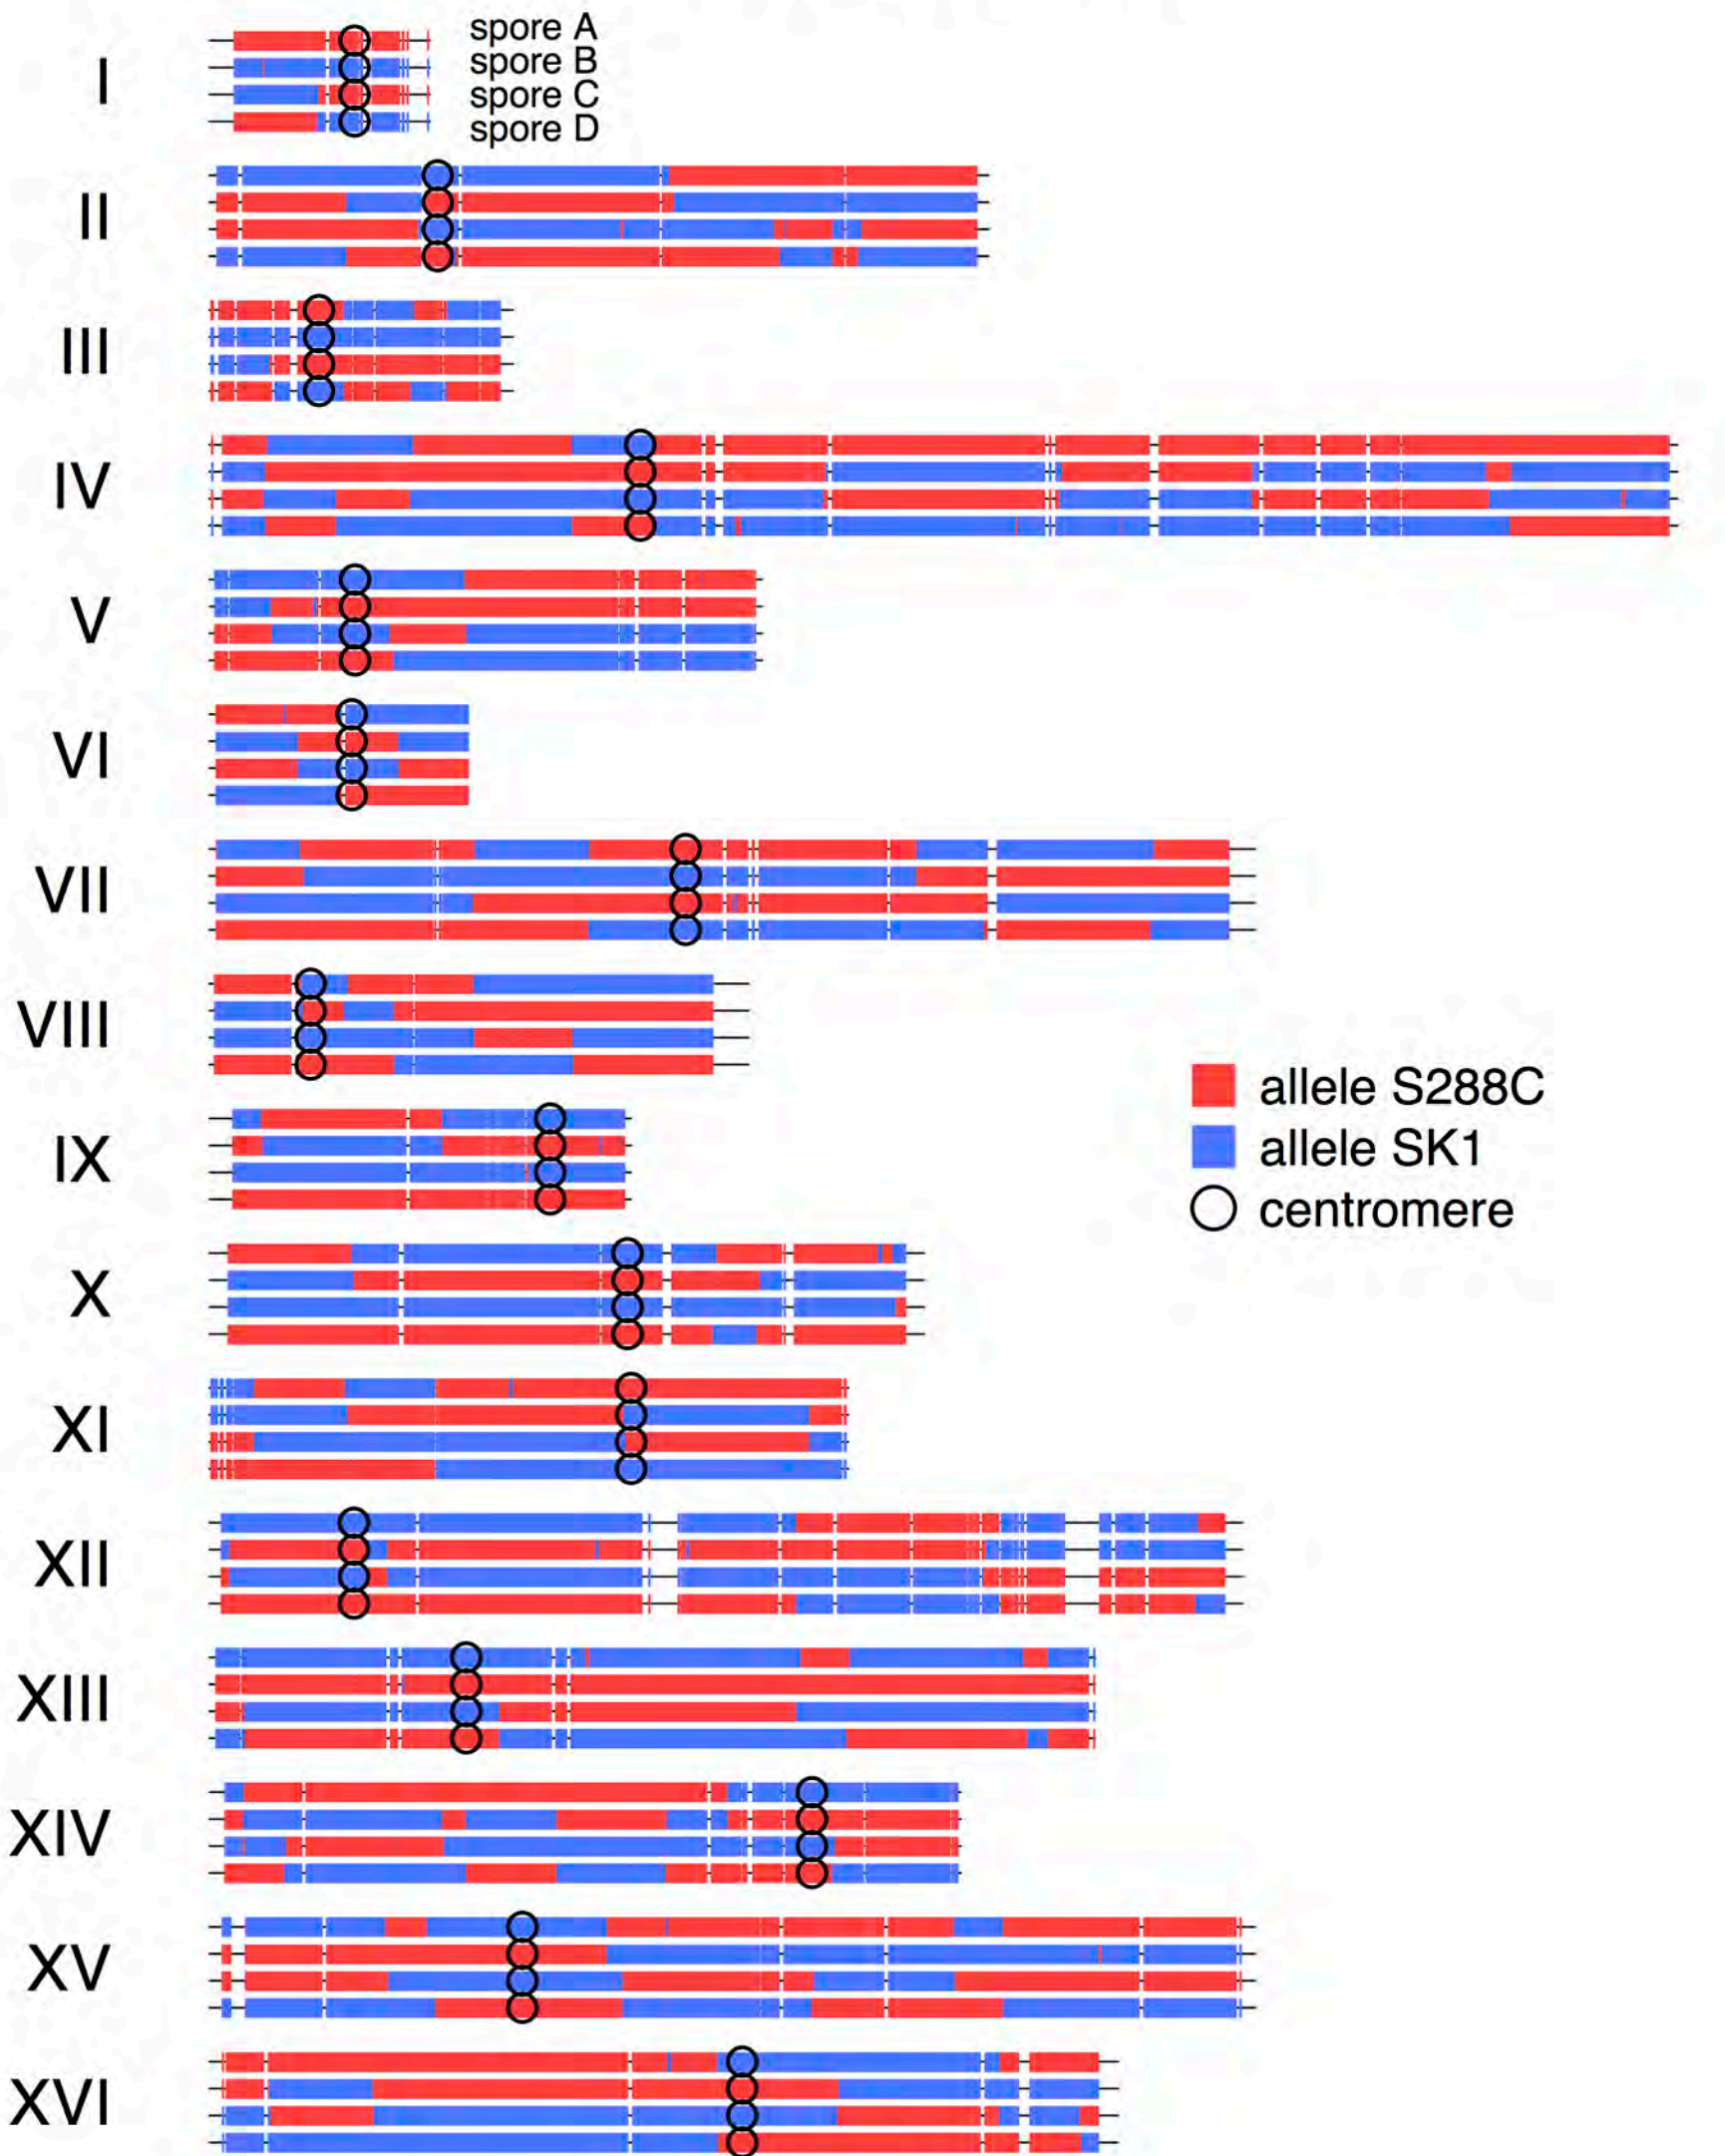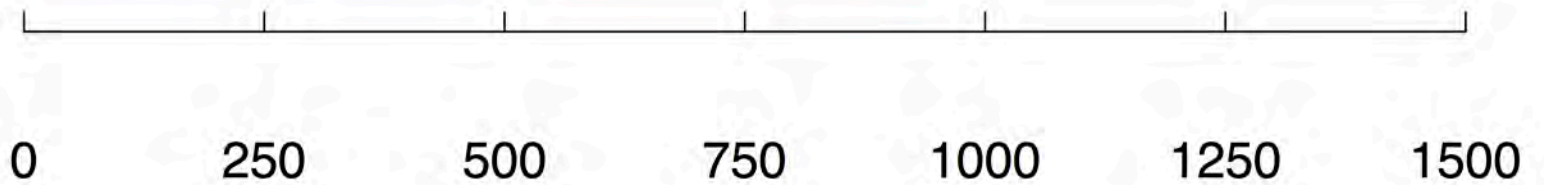

# WT\_tetrad\_16

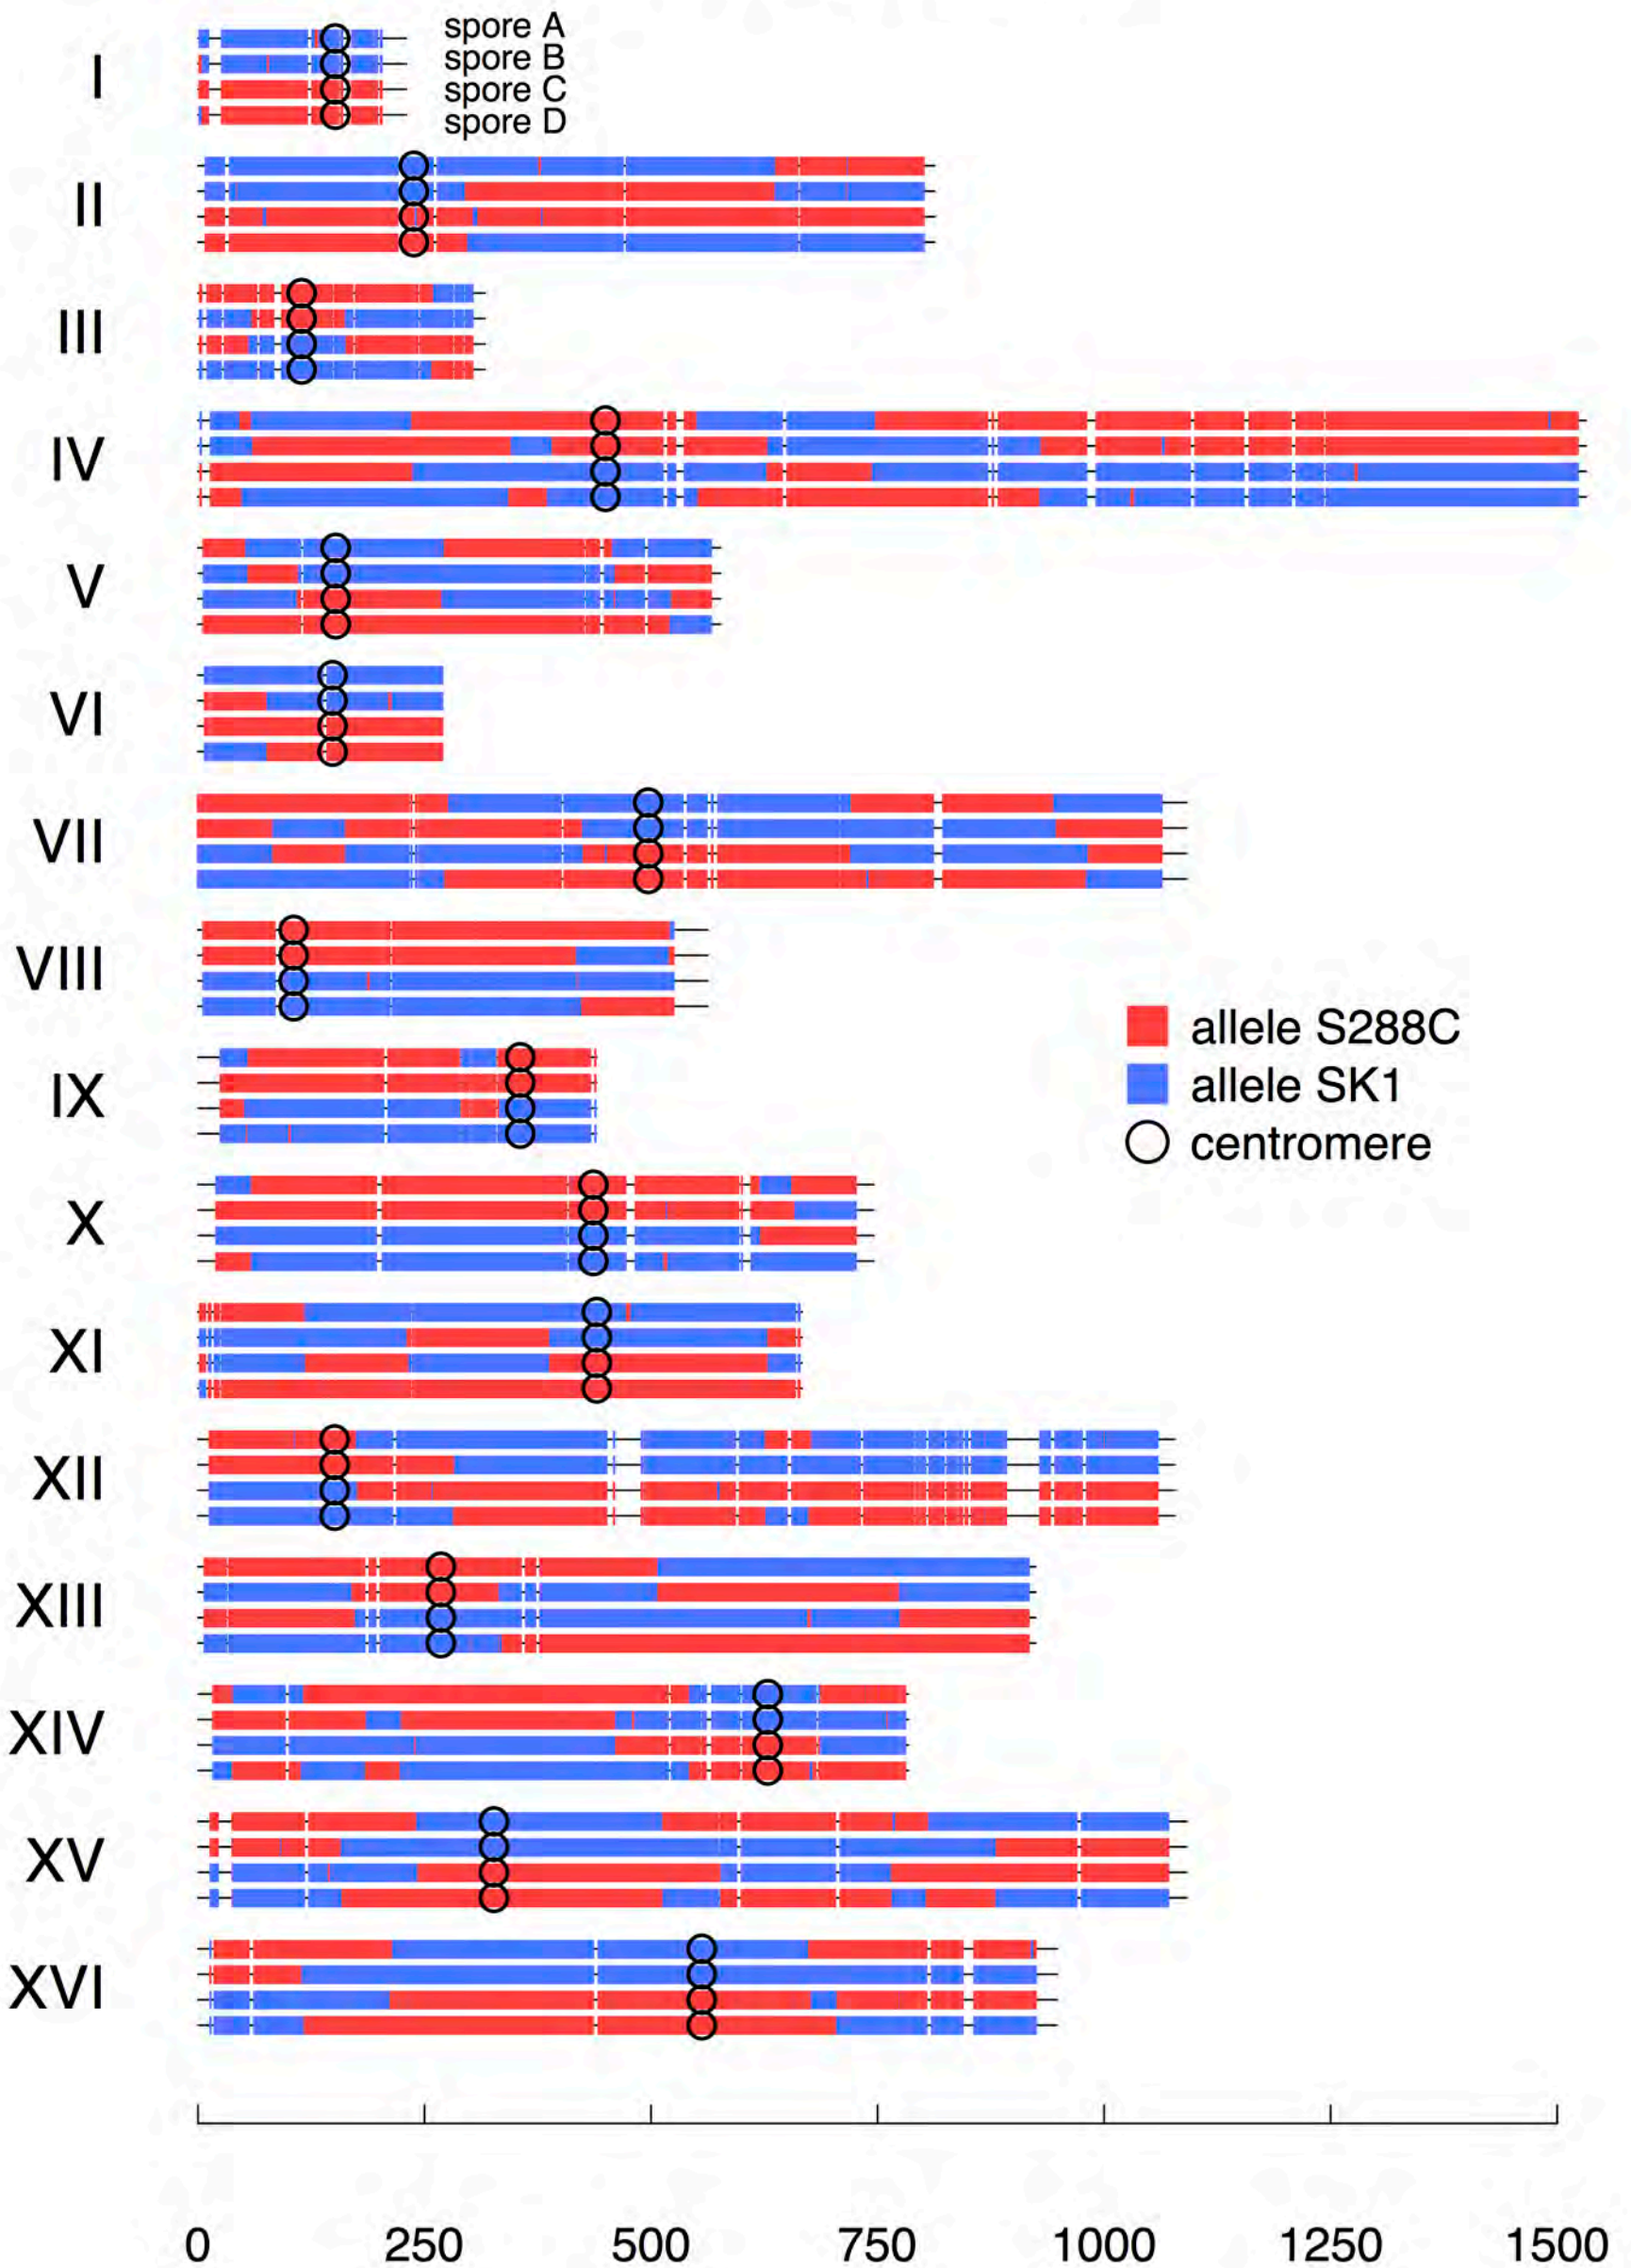



# WT\_tetrad\_17

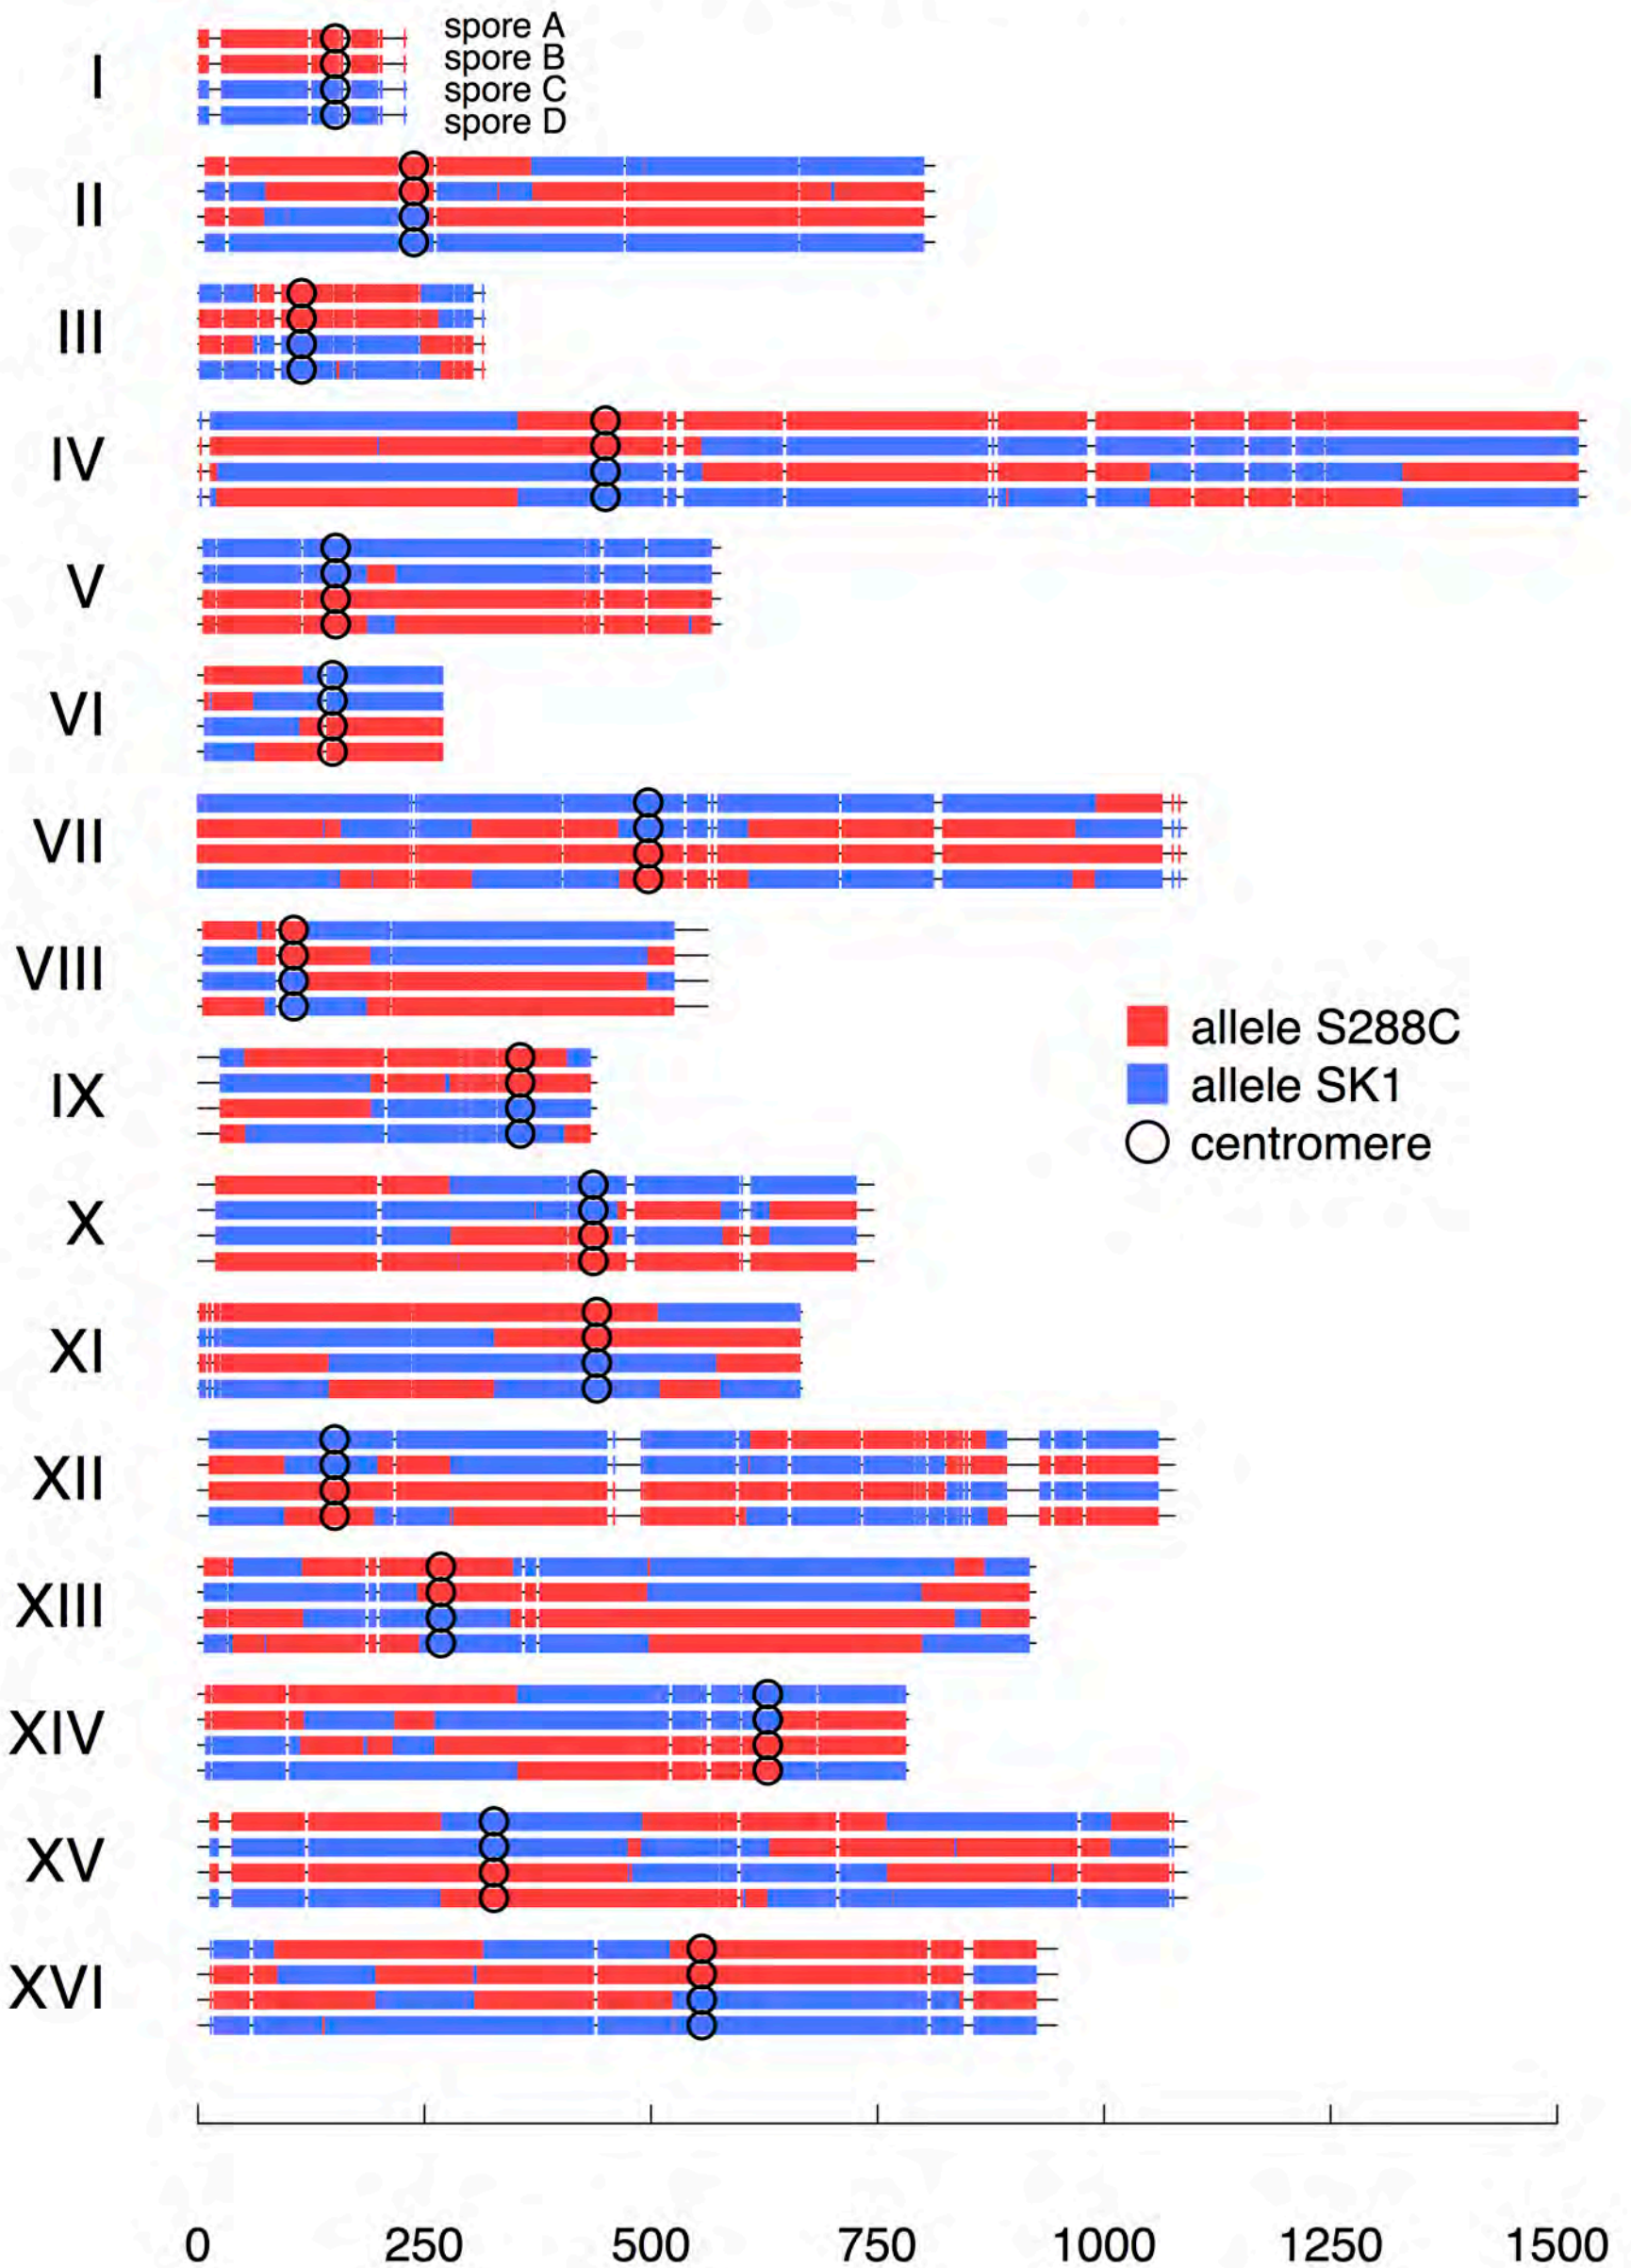

# WT\_tetrad\_18

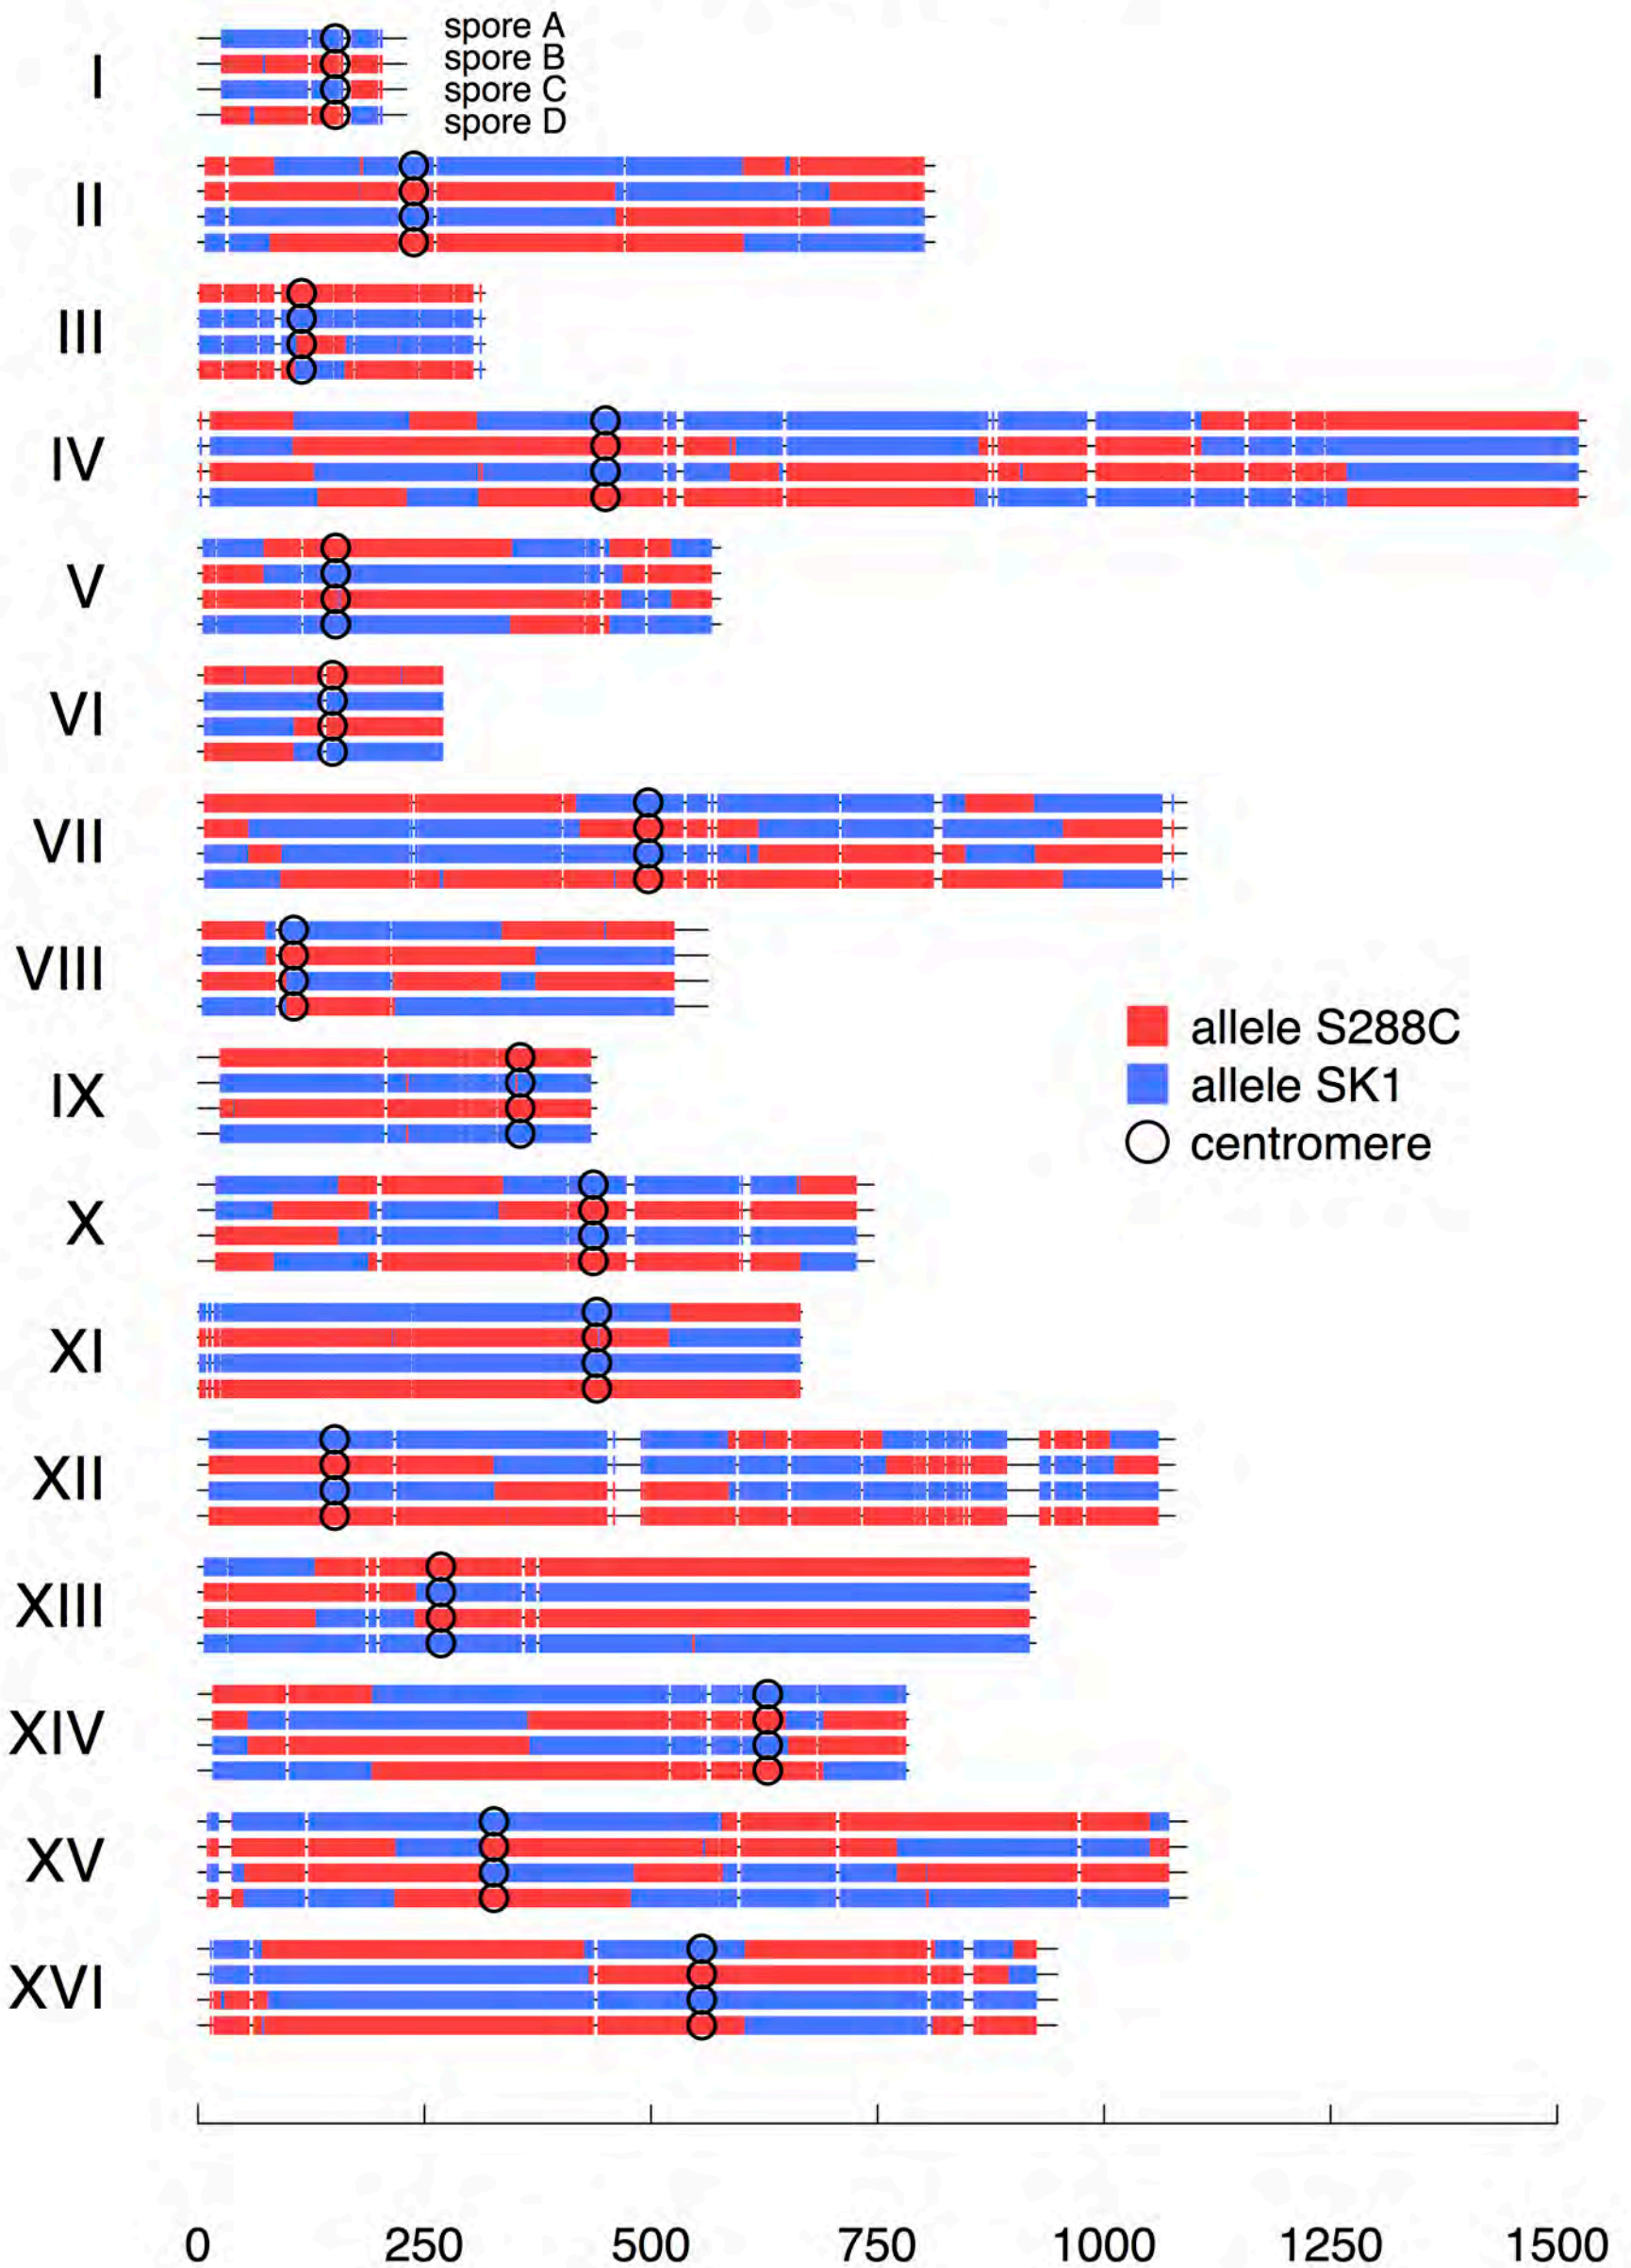

# WT\_tetrad\_19

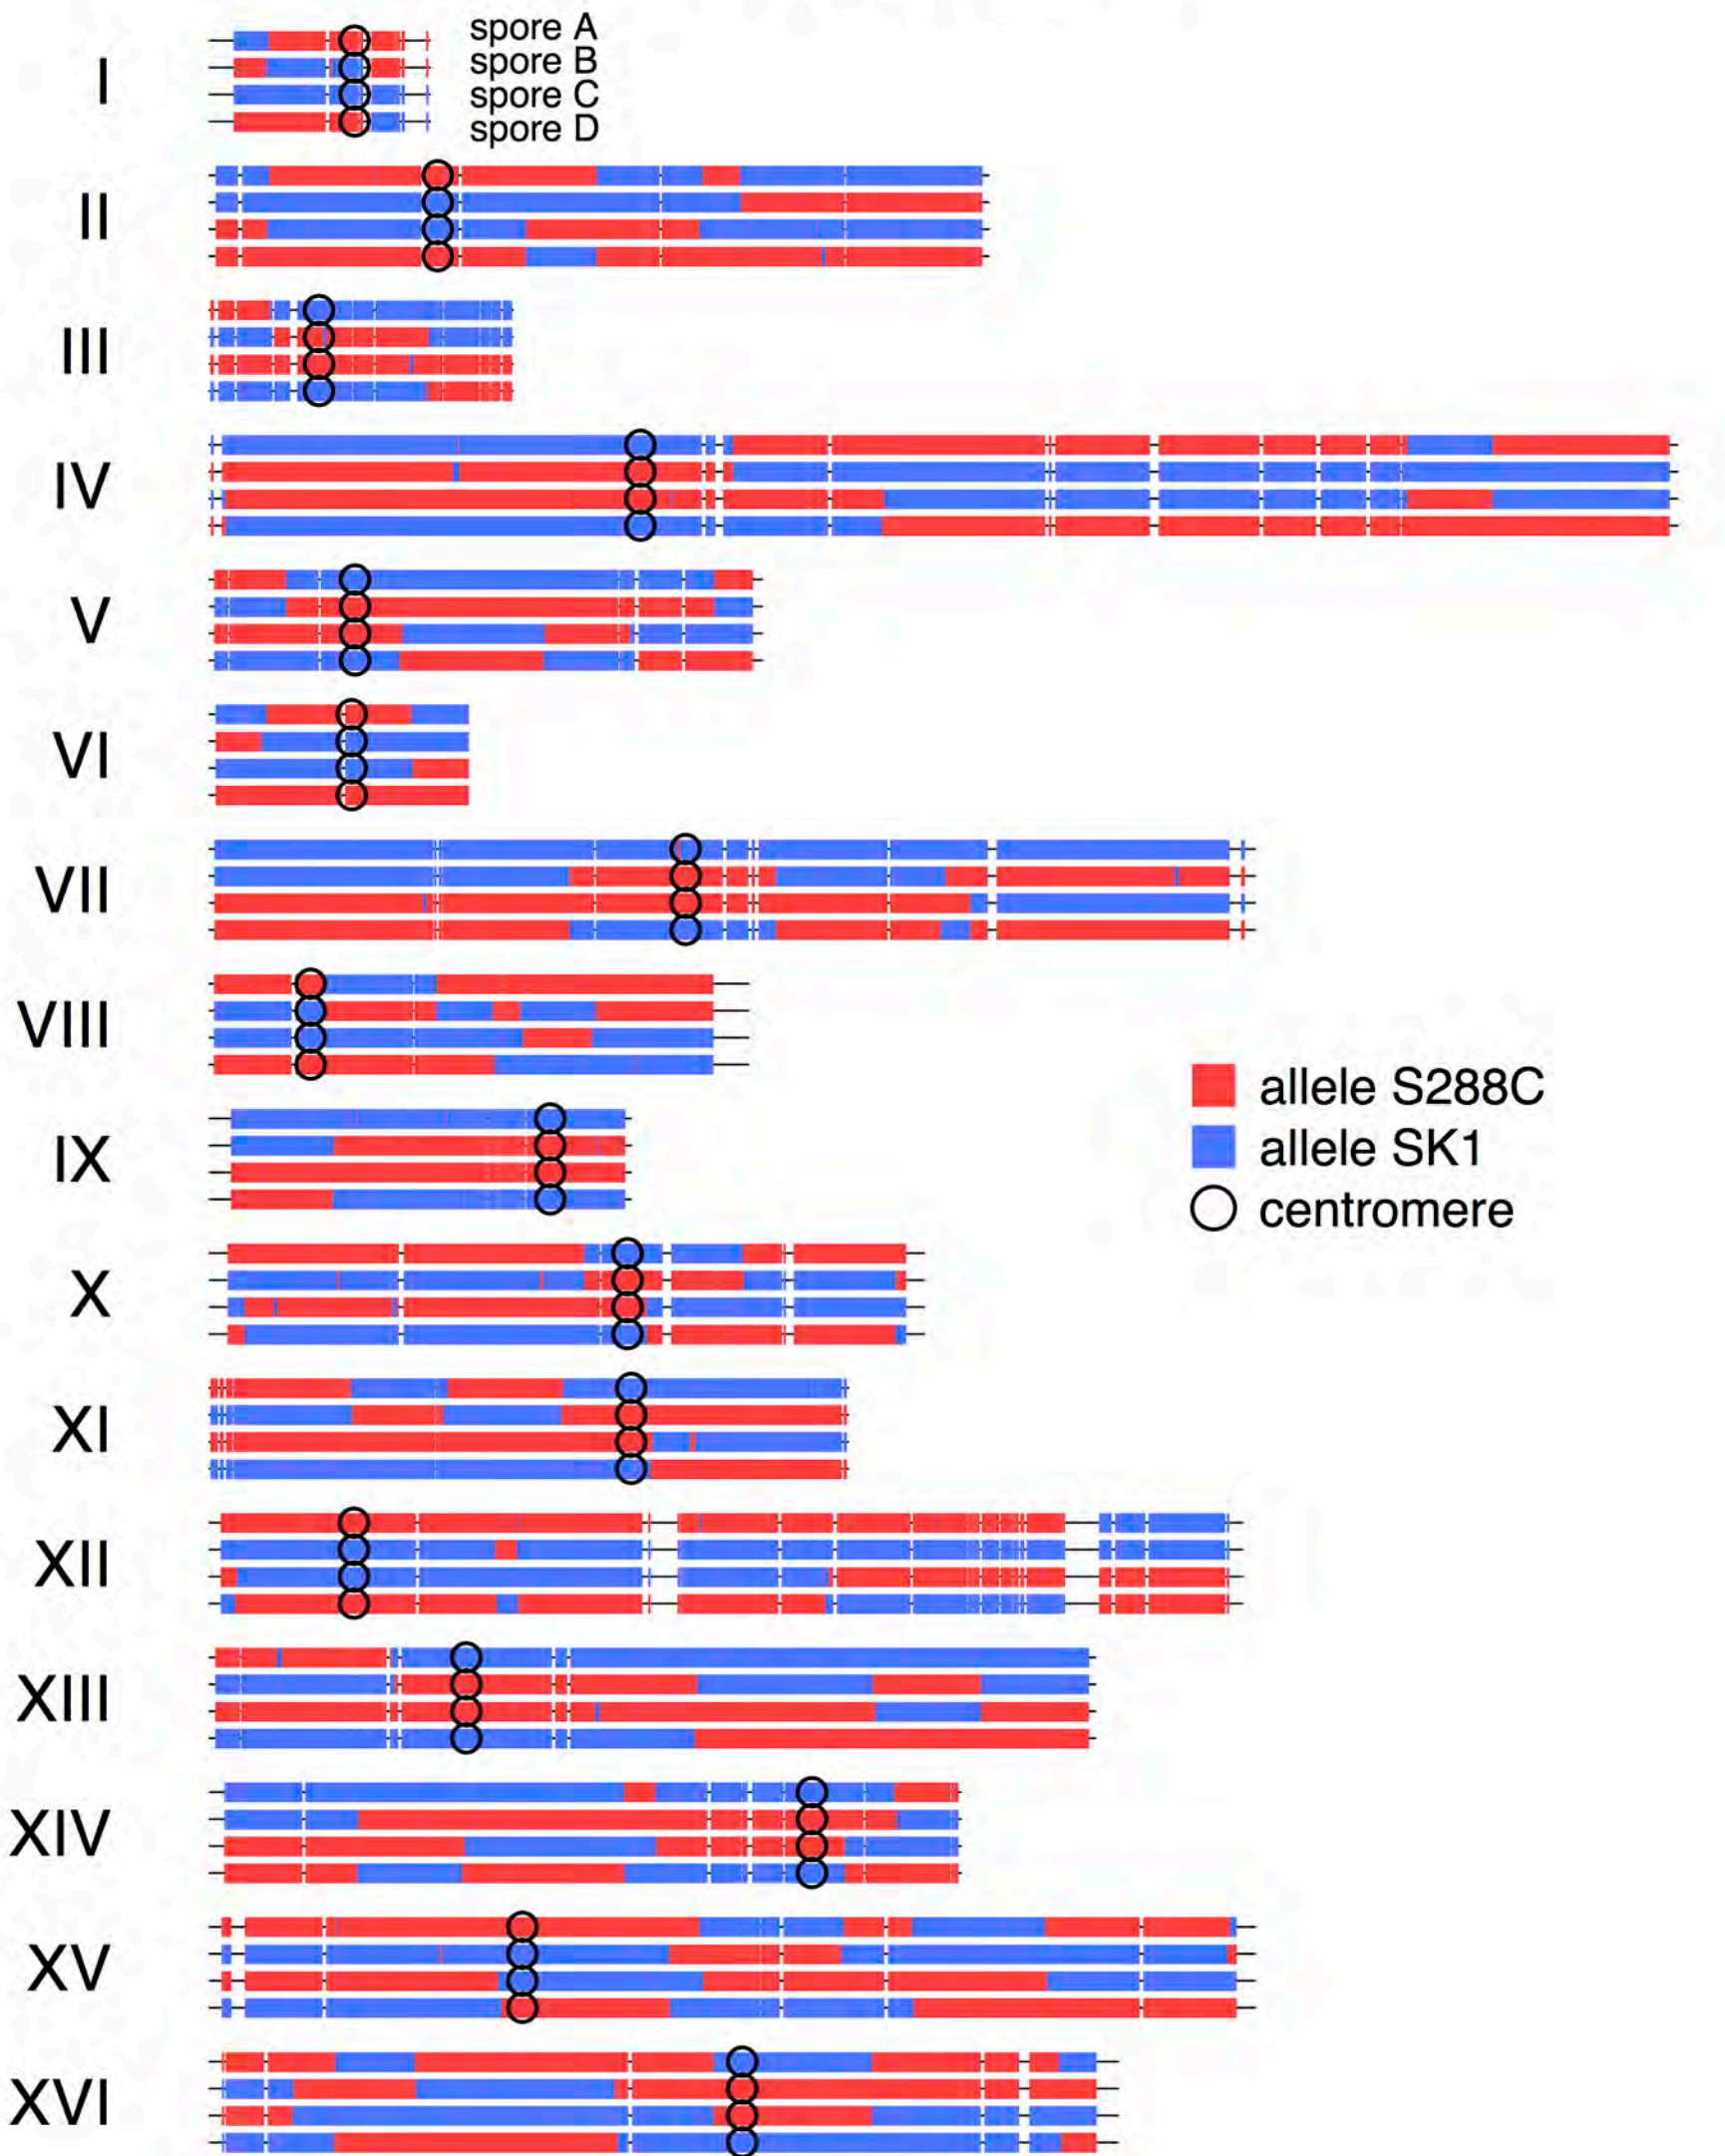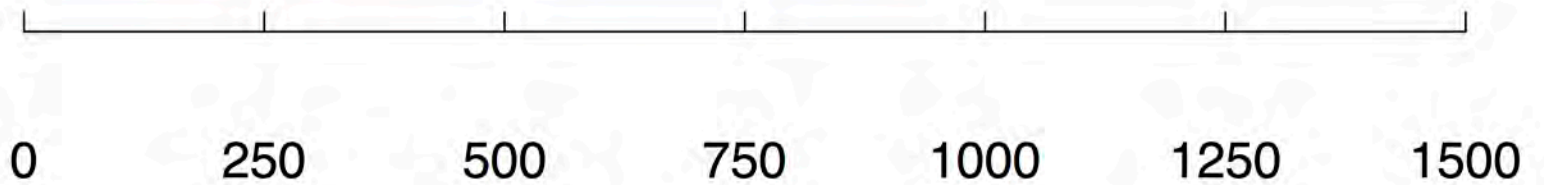

# WT\_tetrad\_20

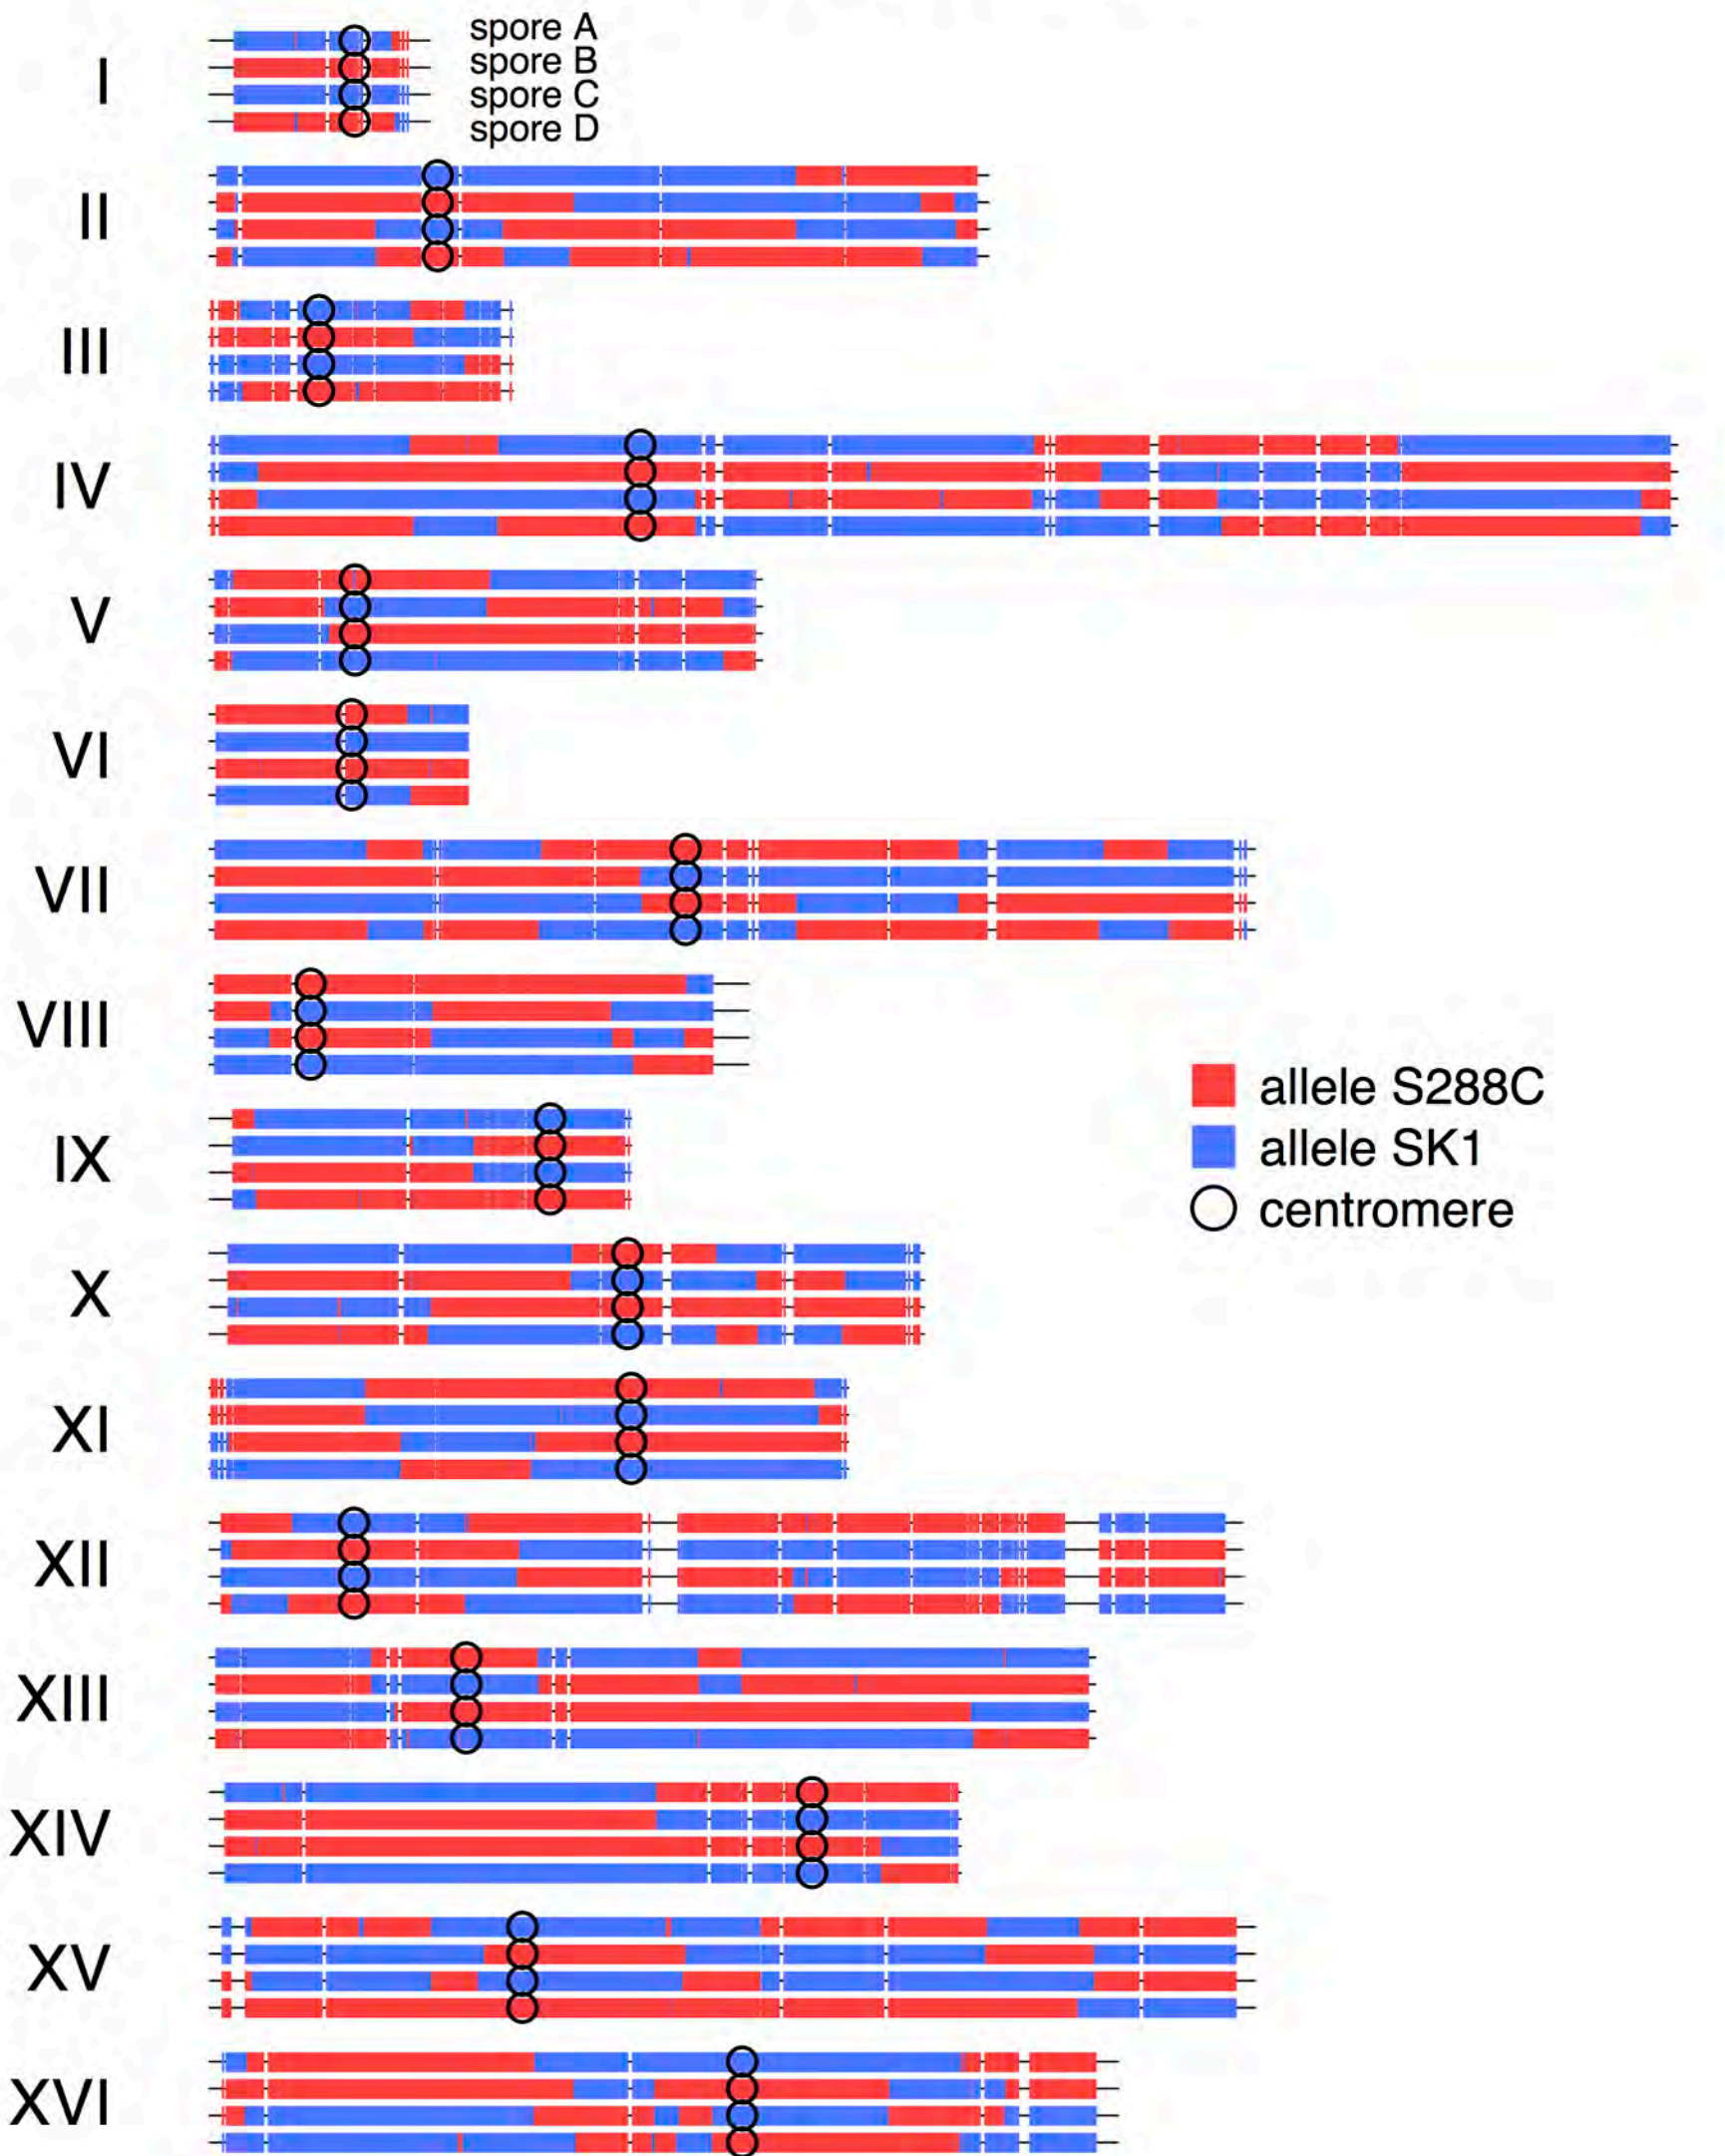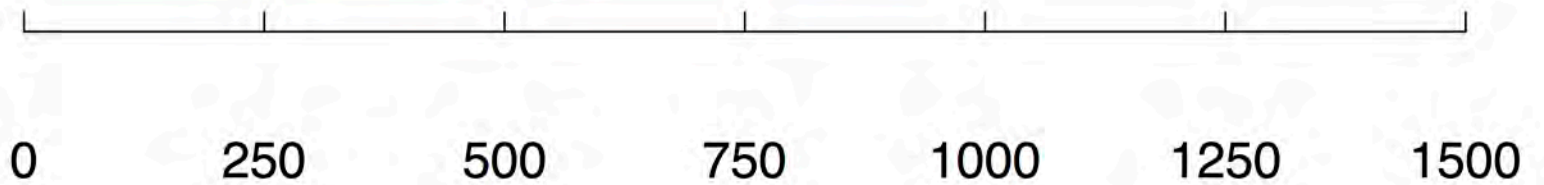

# hed1\_dmc1\_tetrad\_1

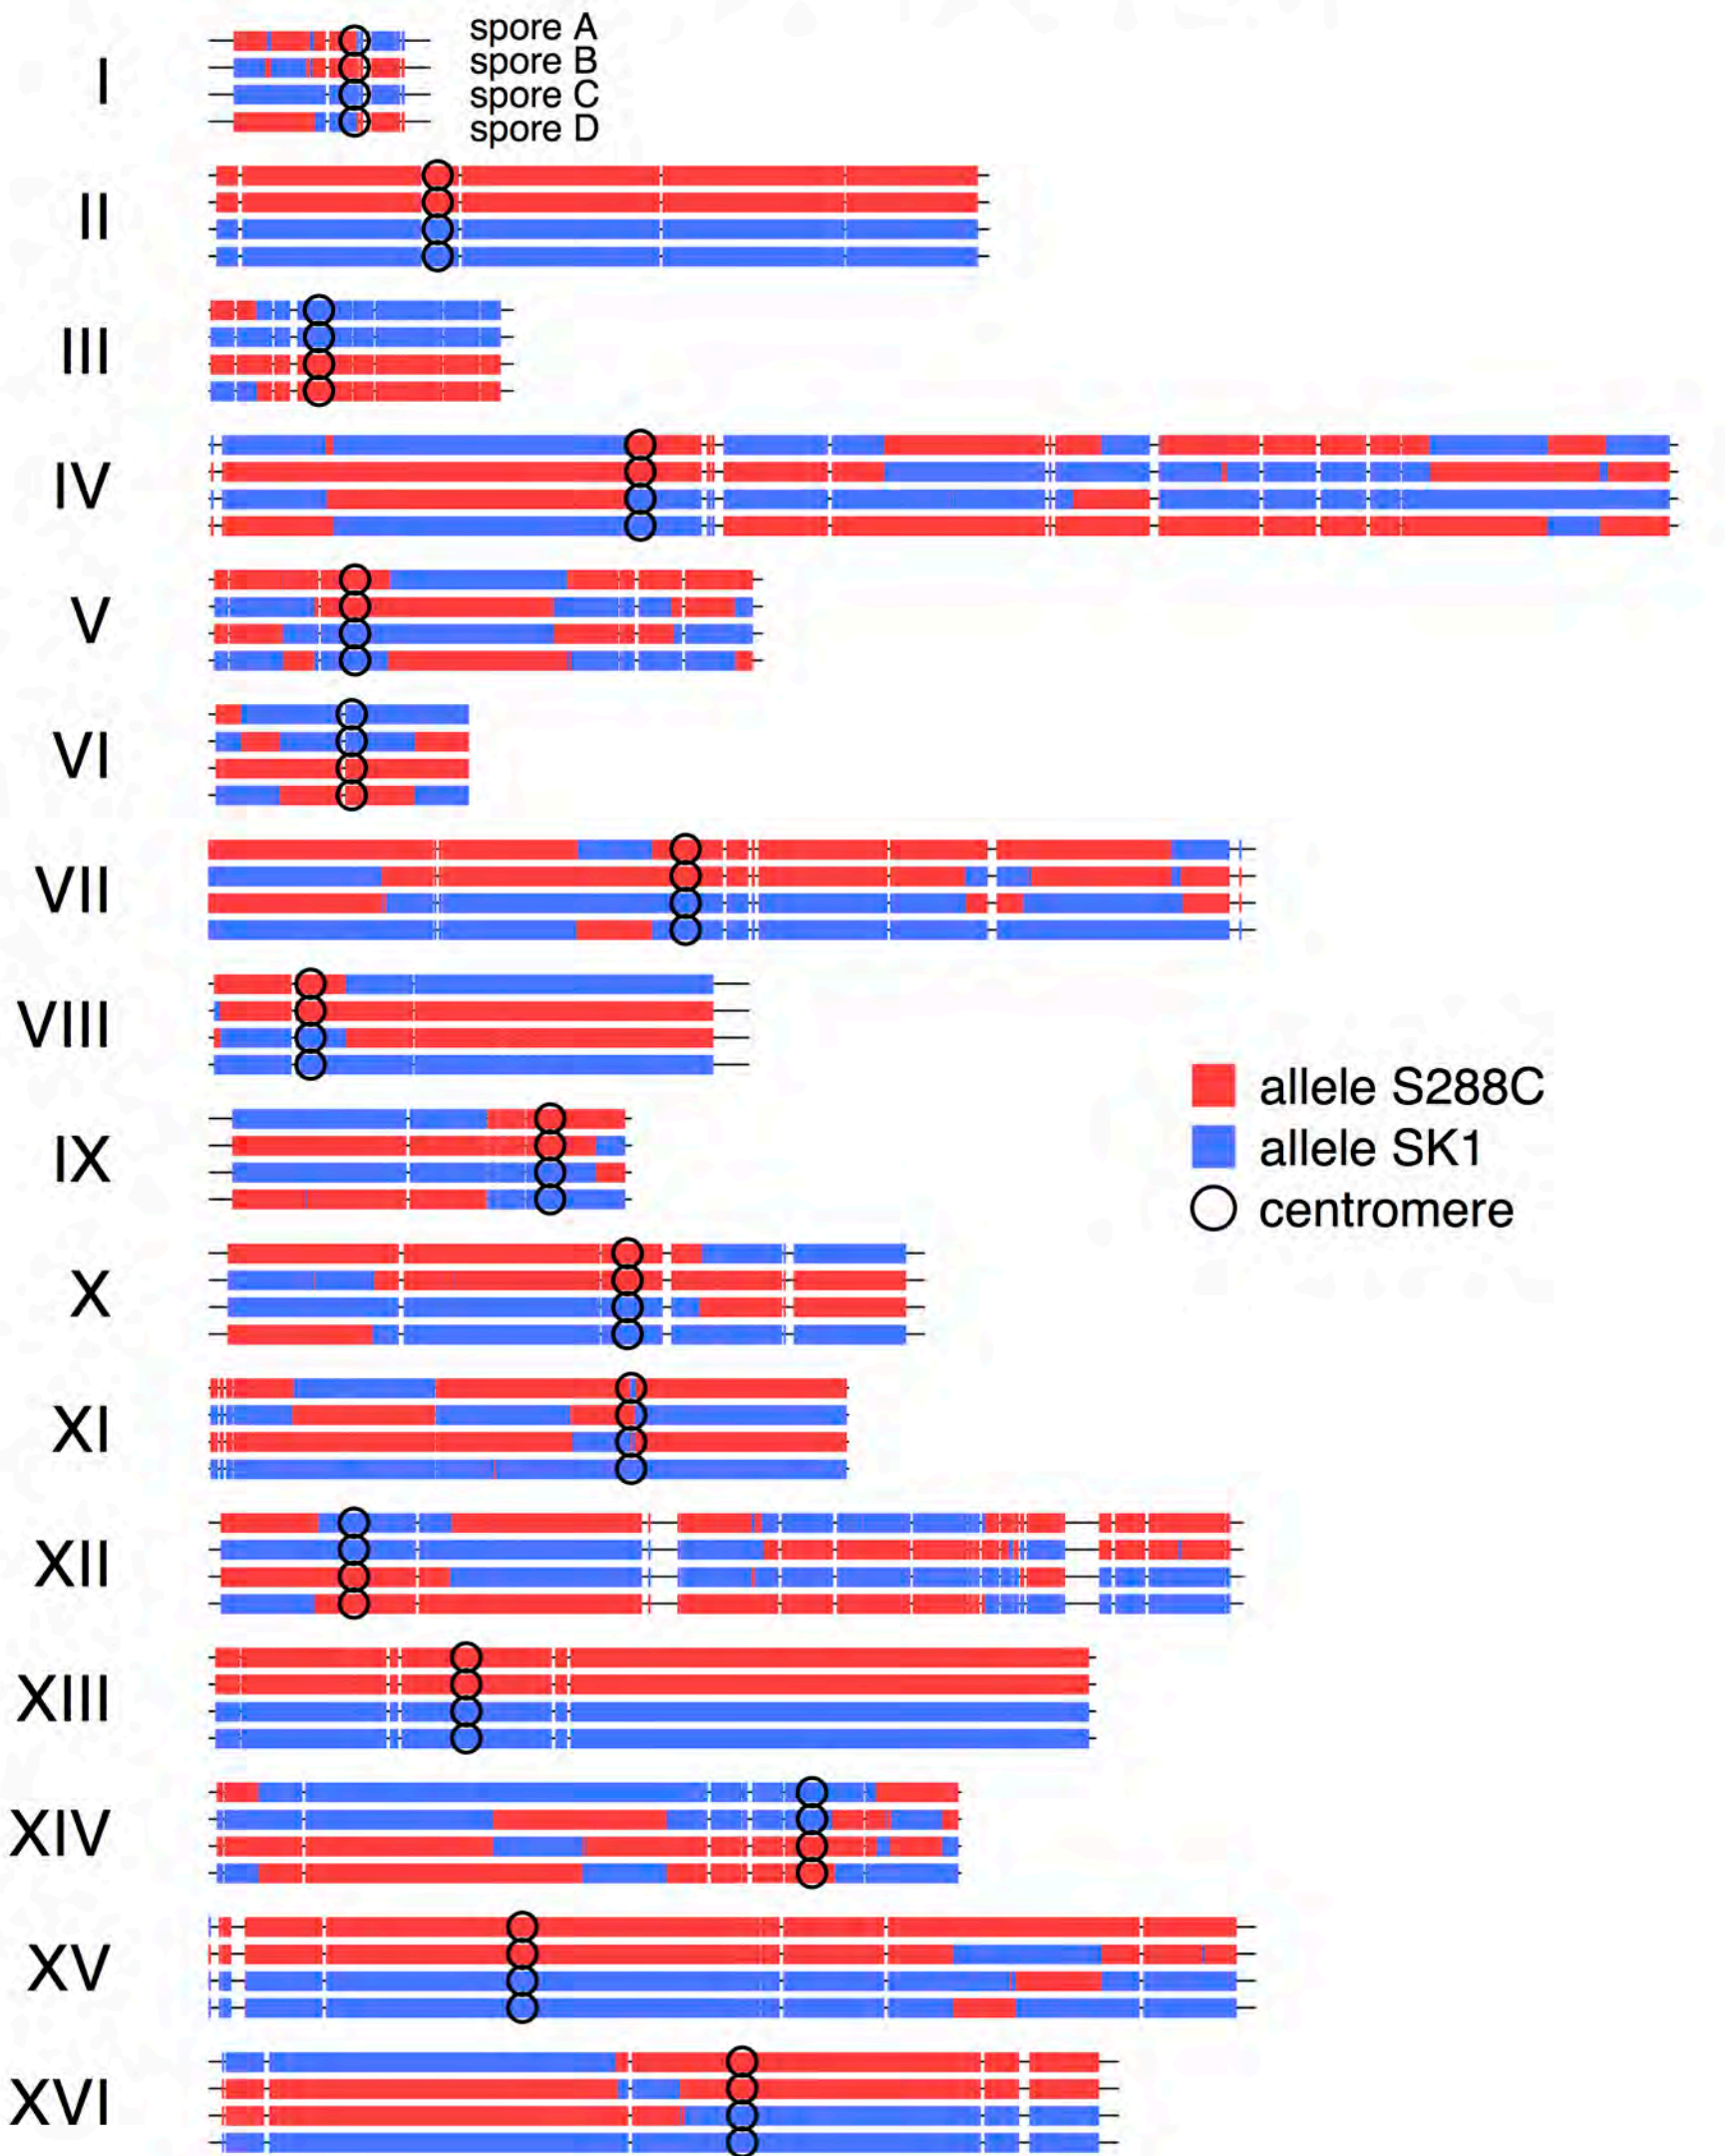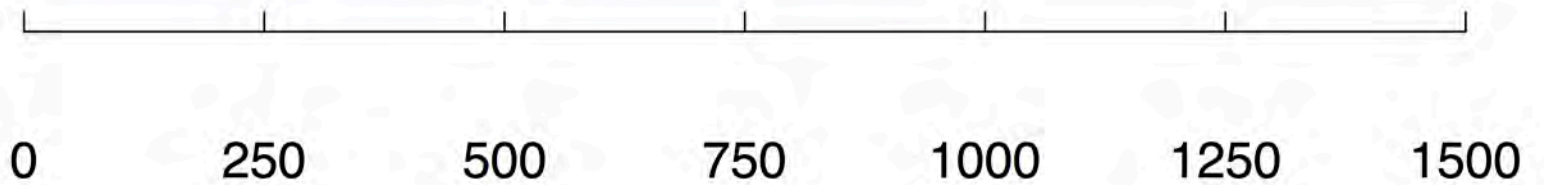

# hed1\_dmc1\_tetrad\_2

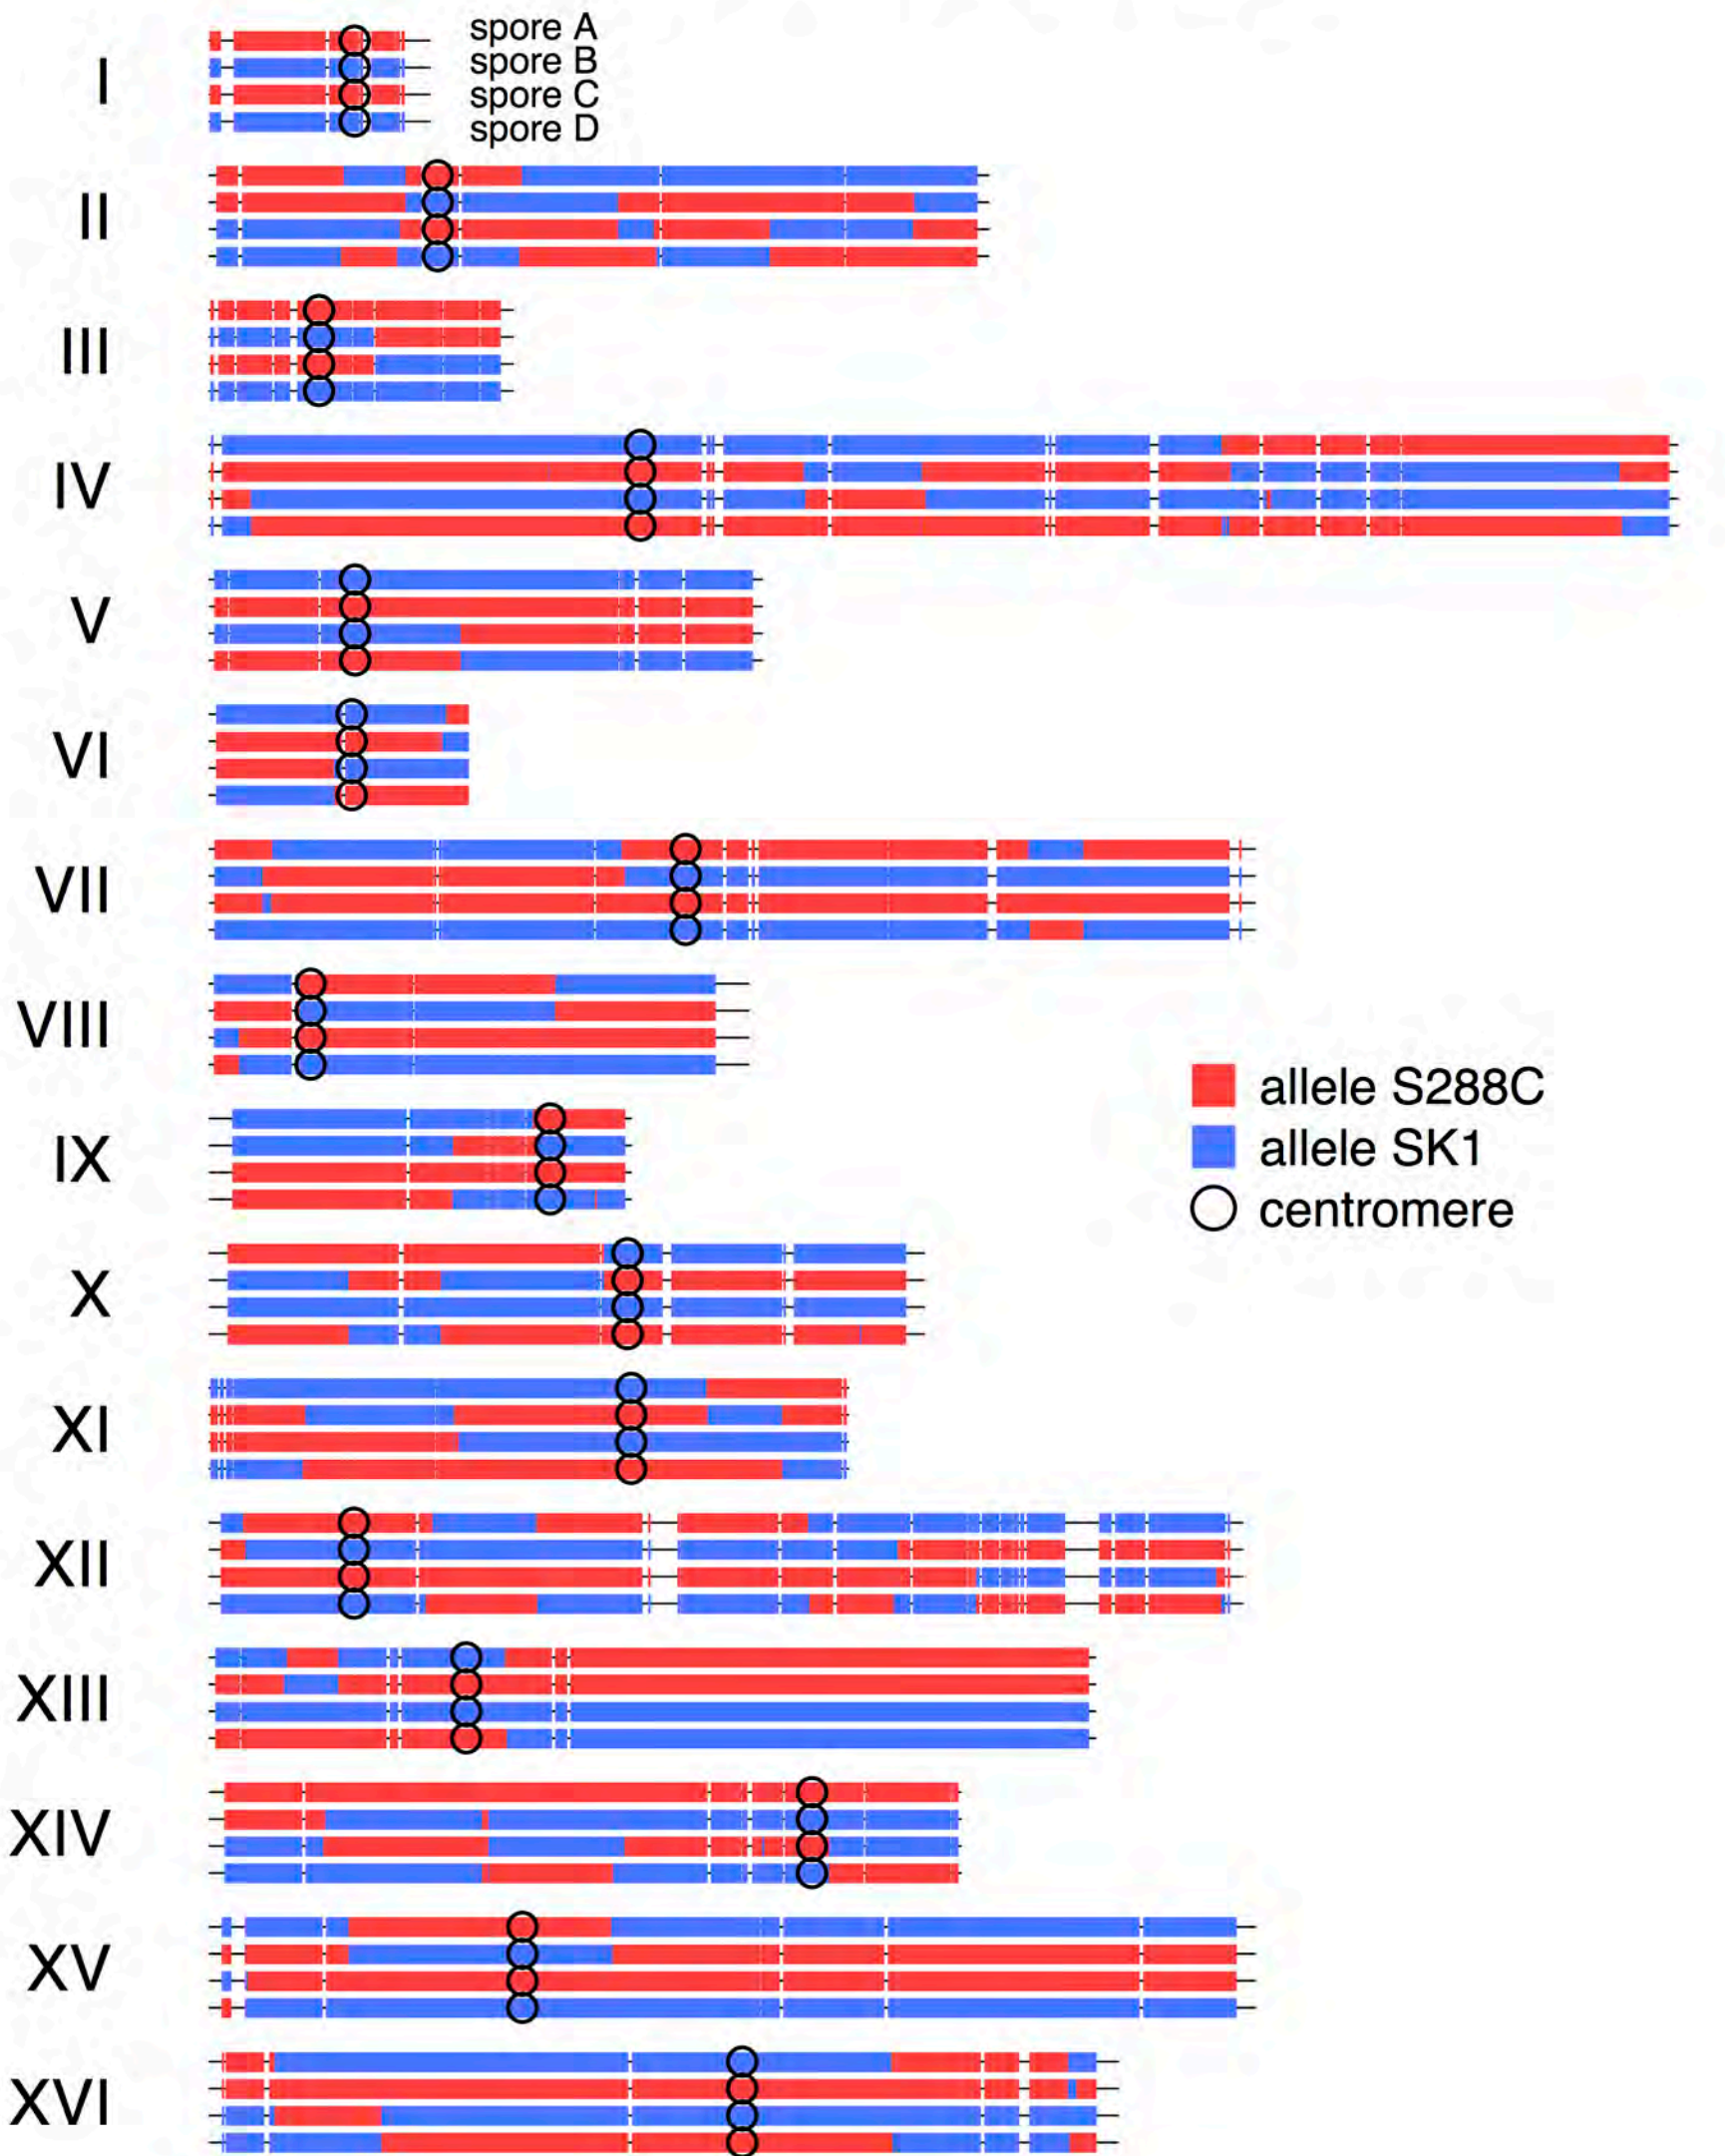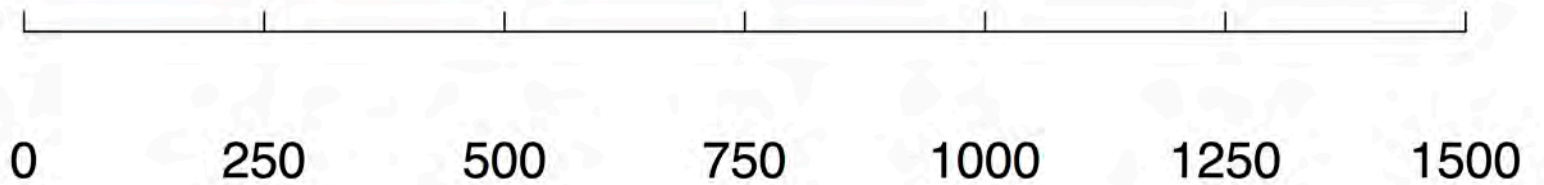

# hed1\_dmc1\_tetrad\_3

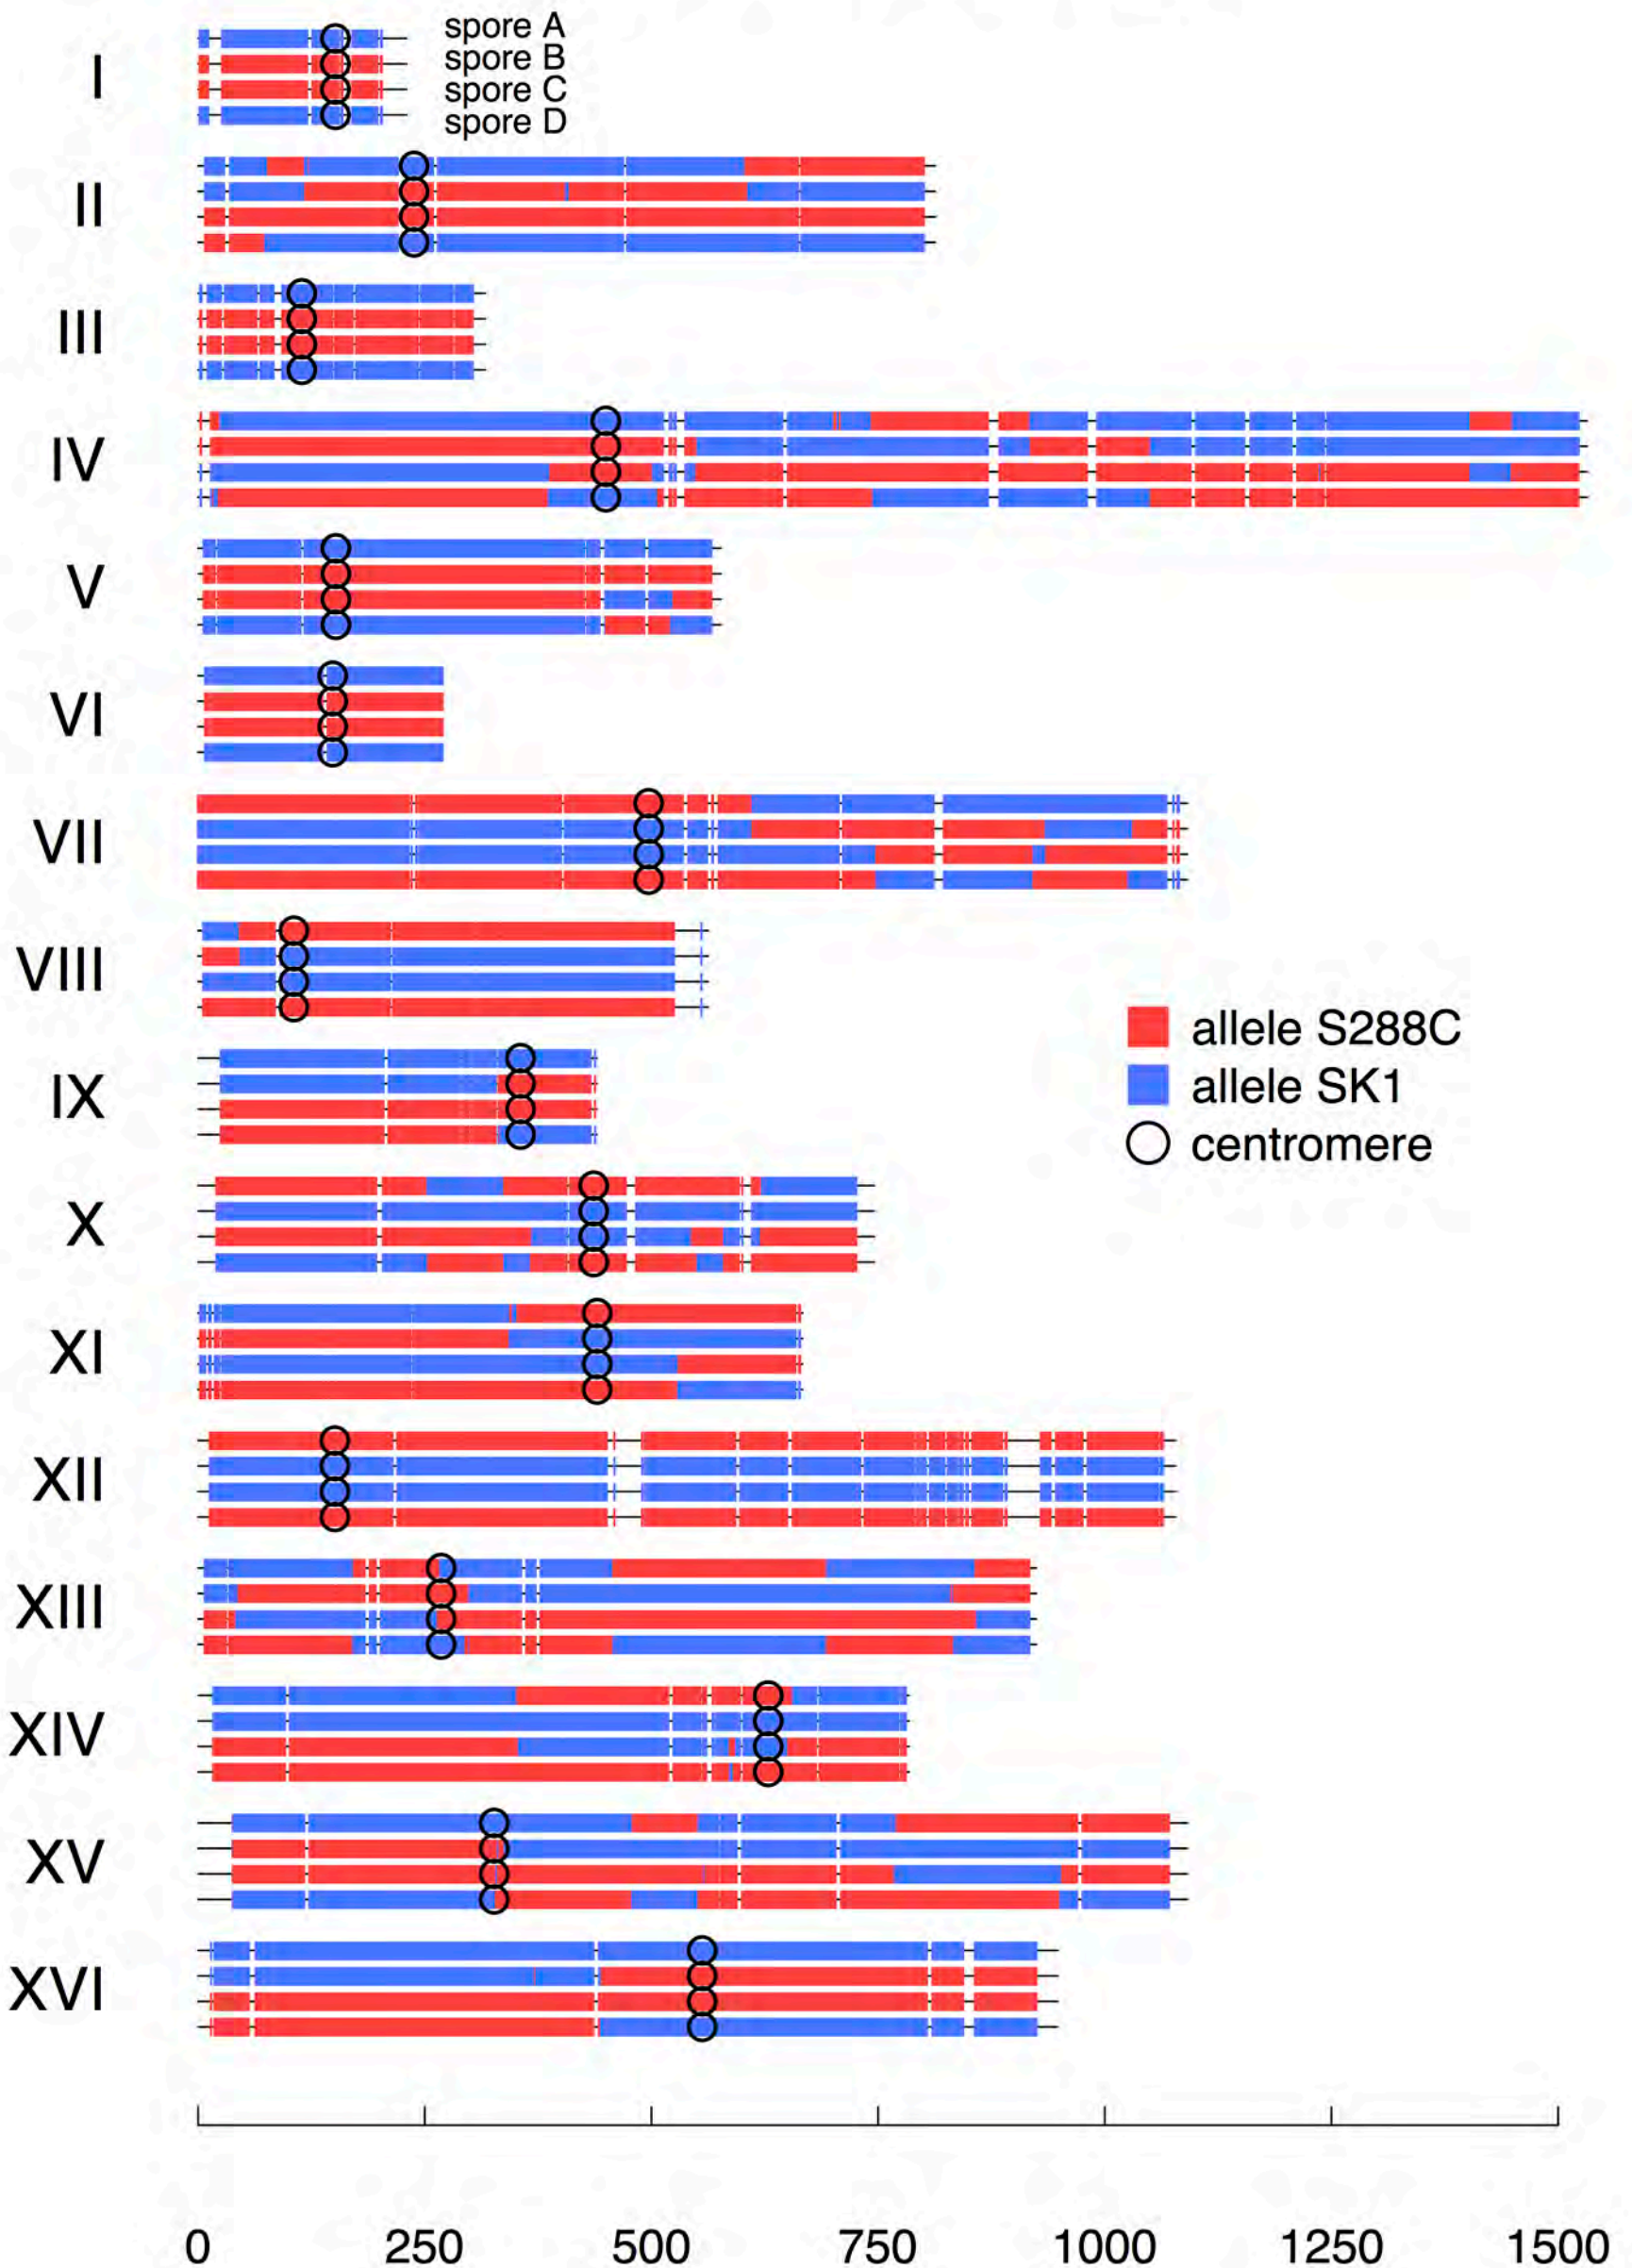

# hed1\_dmc1\_tetrad\_4

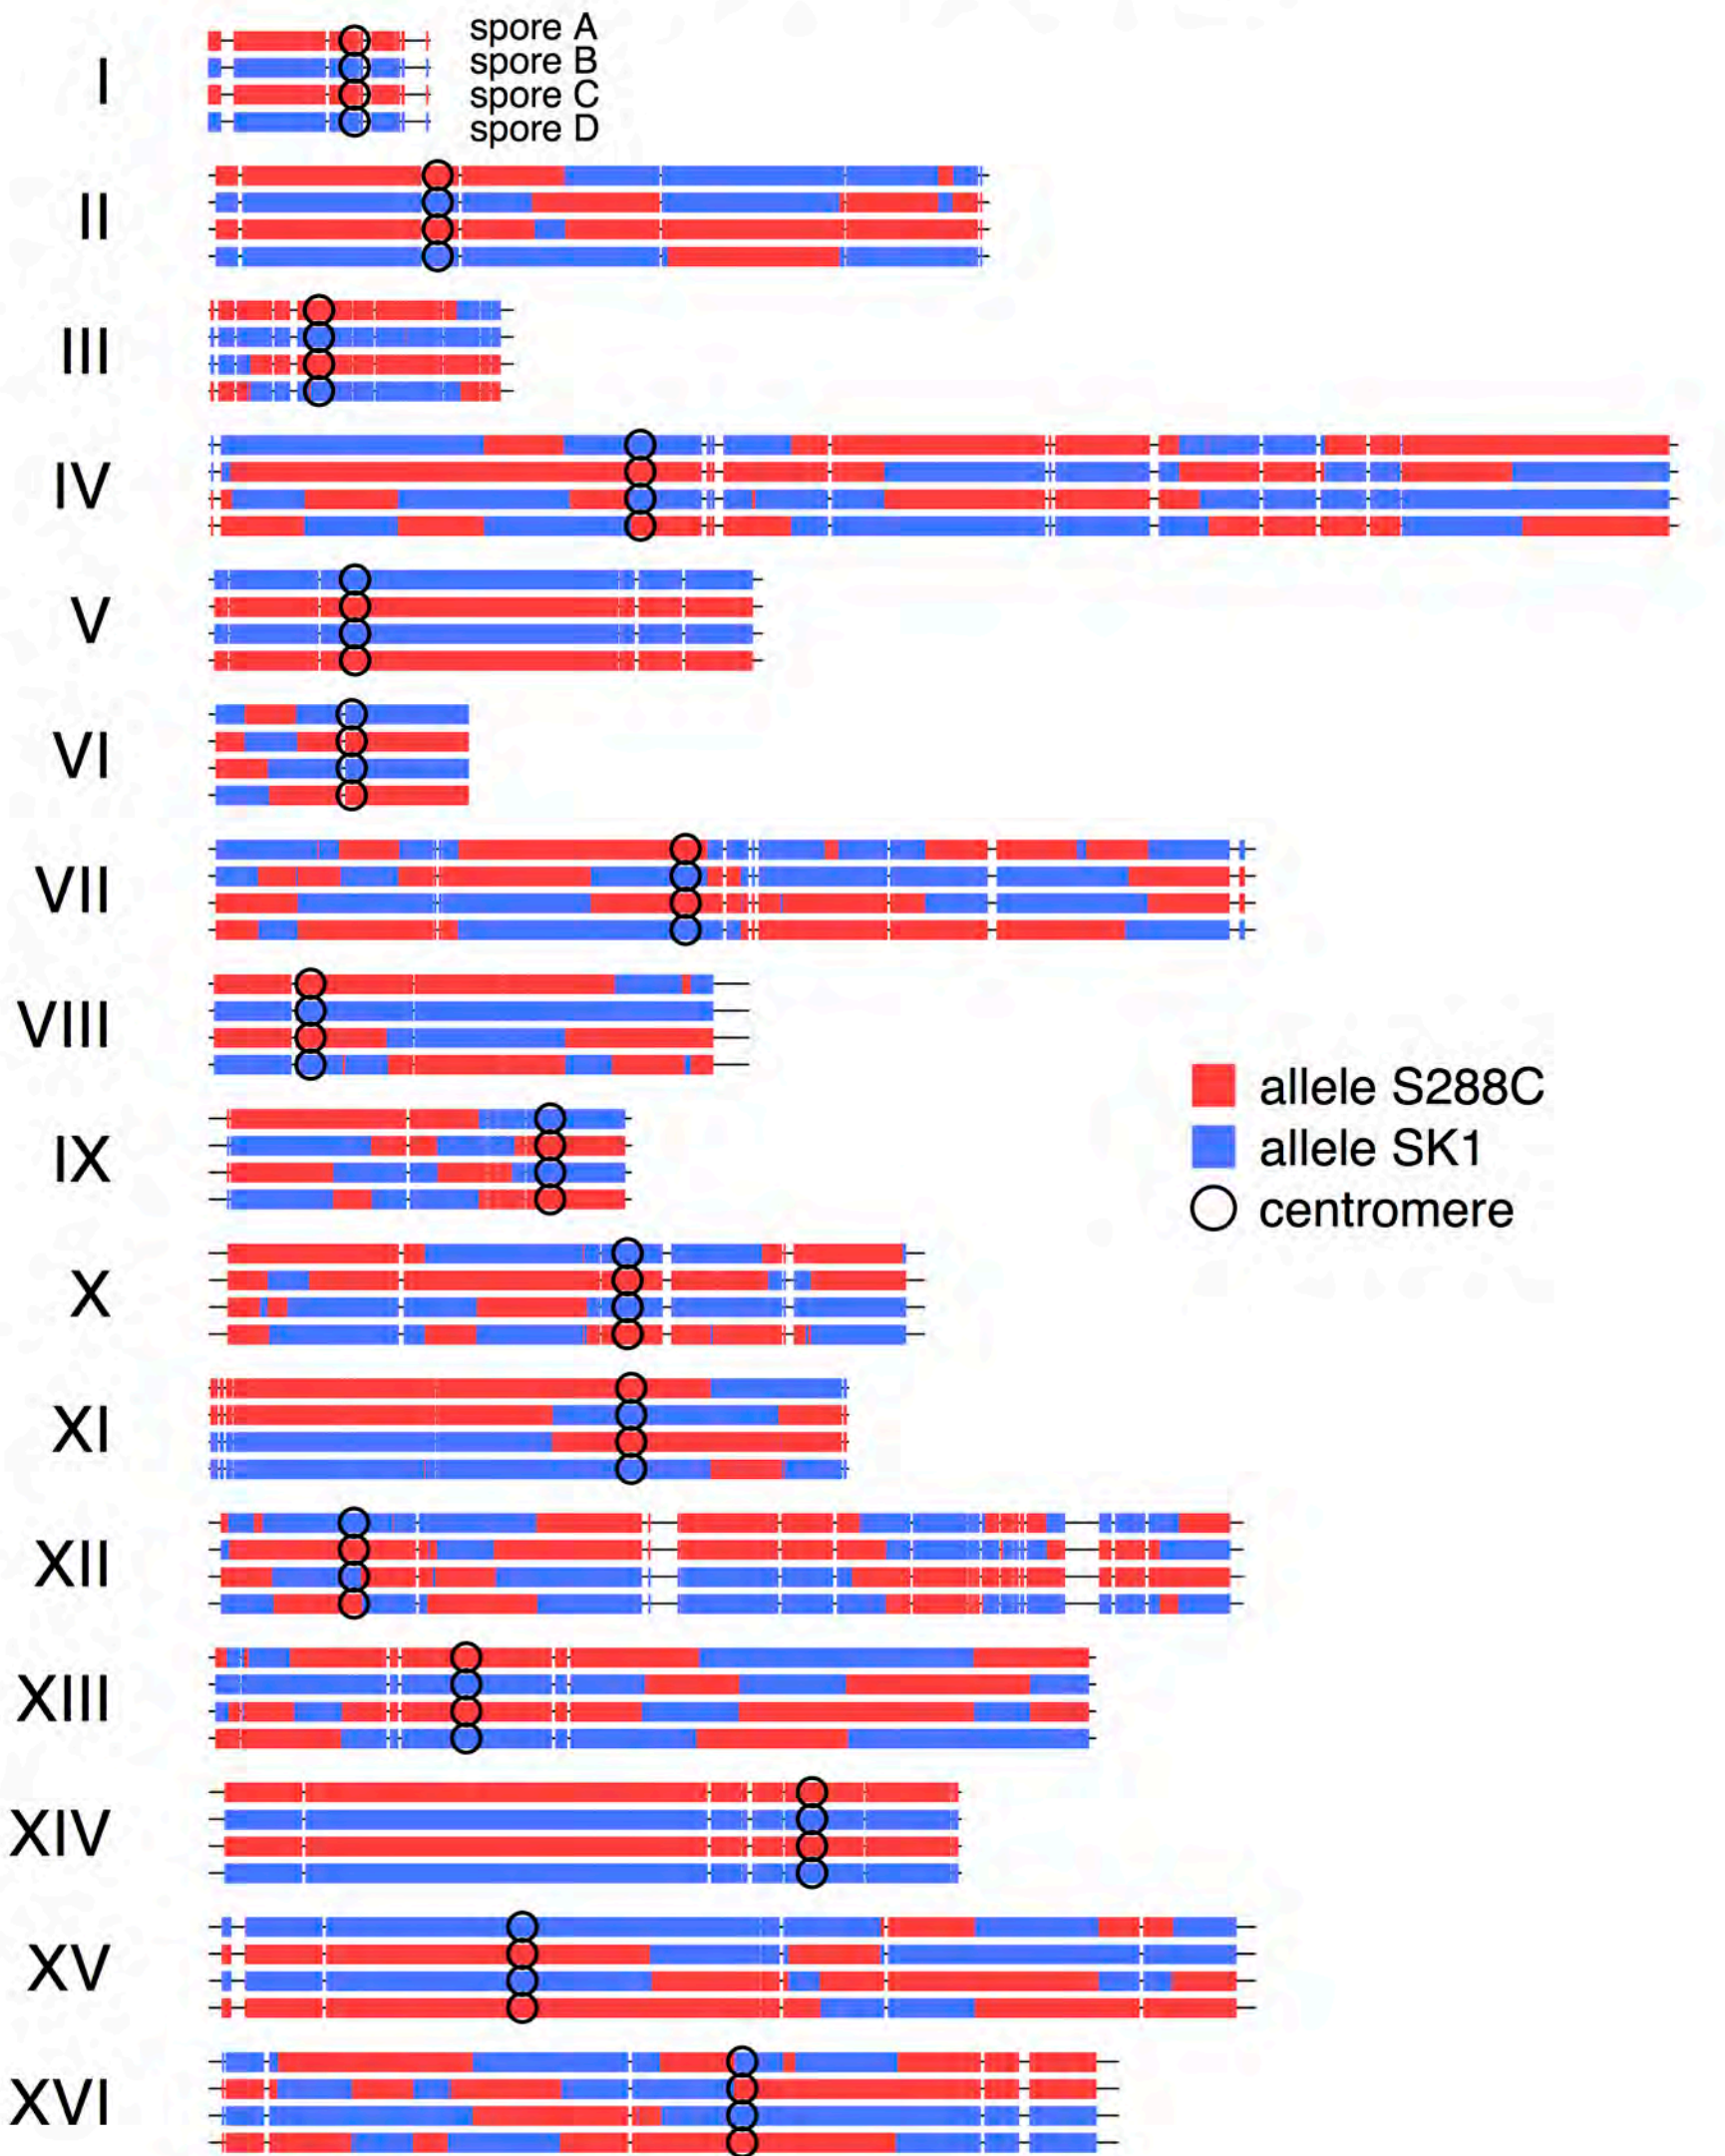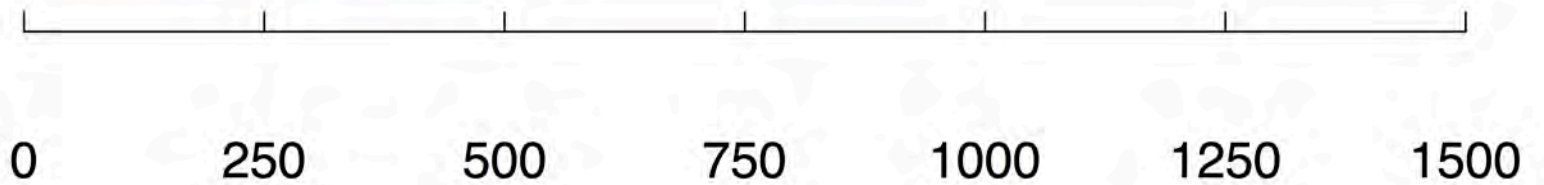



# hed1\_dmc1\_tetrad\_5

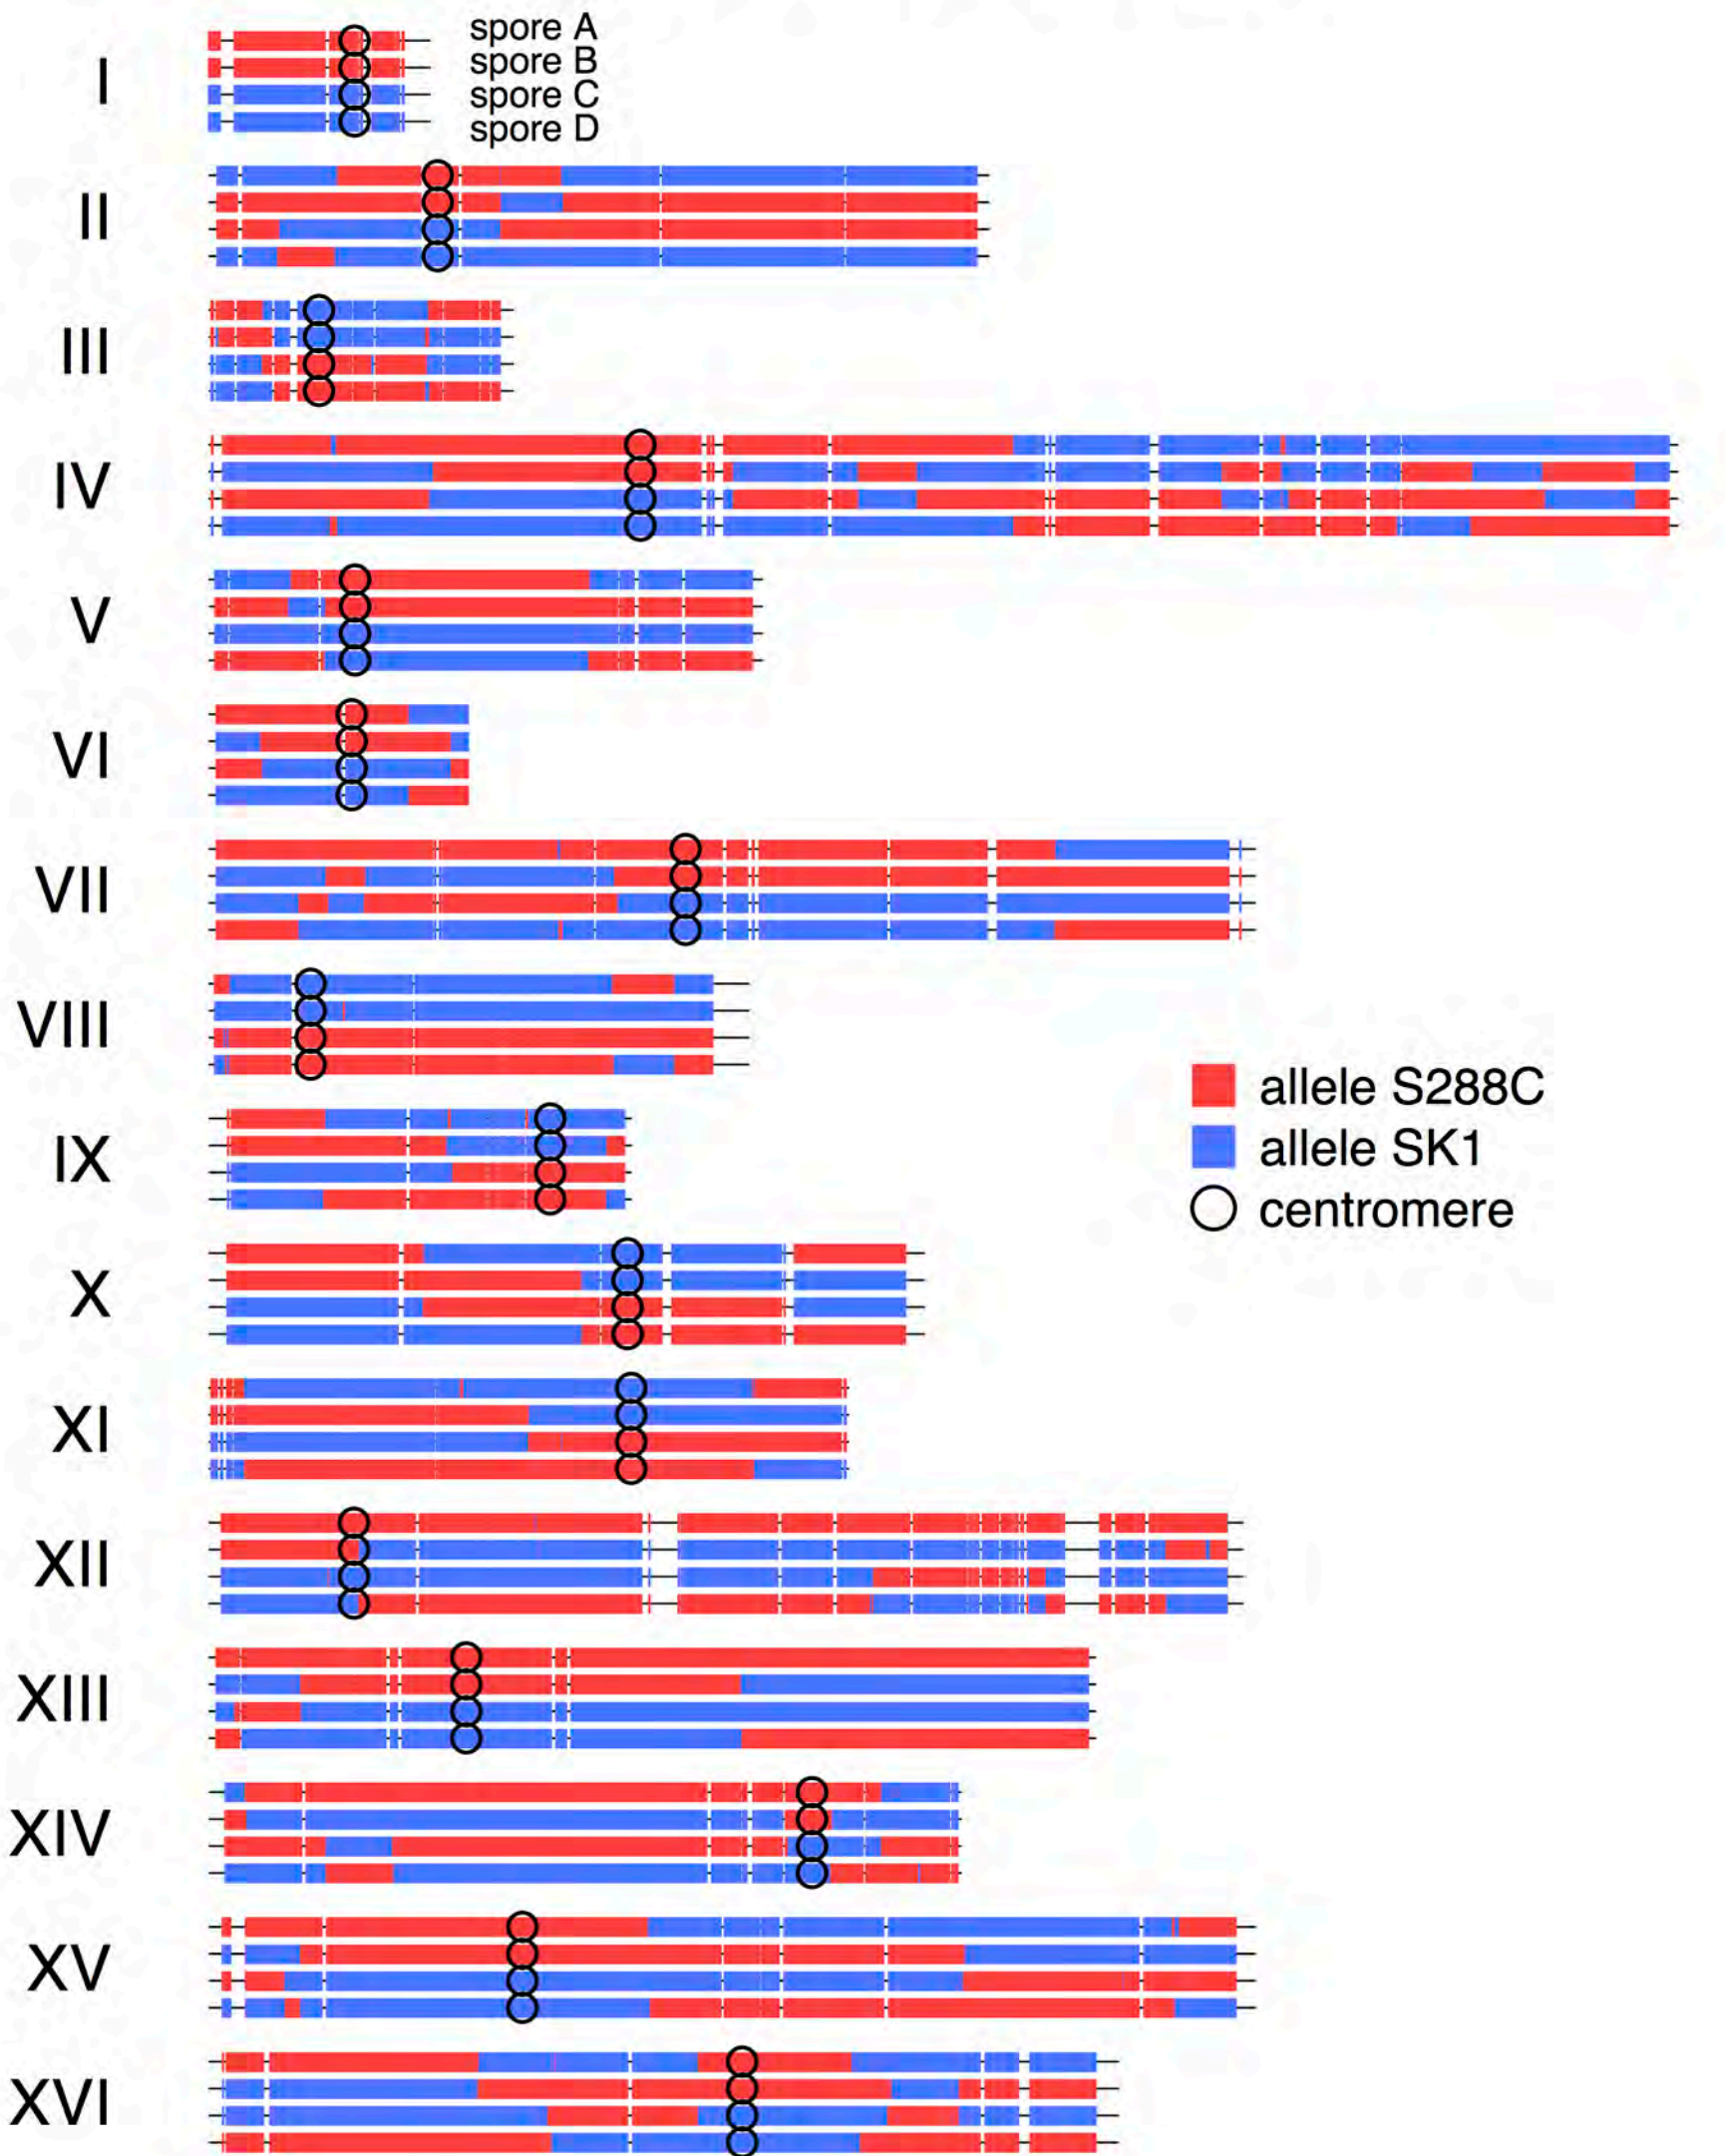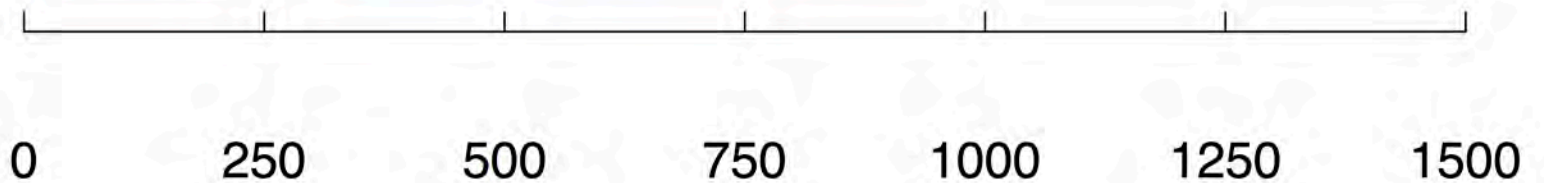

# hed1\_dmc1\_tetrad\_6

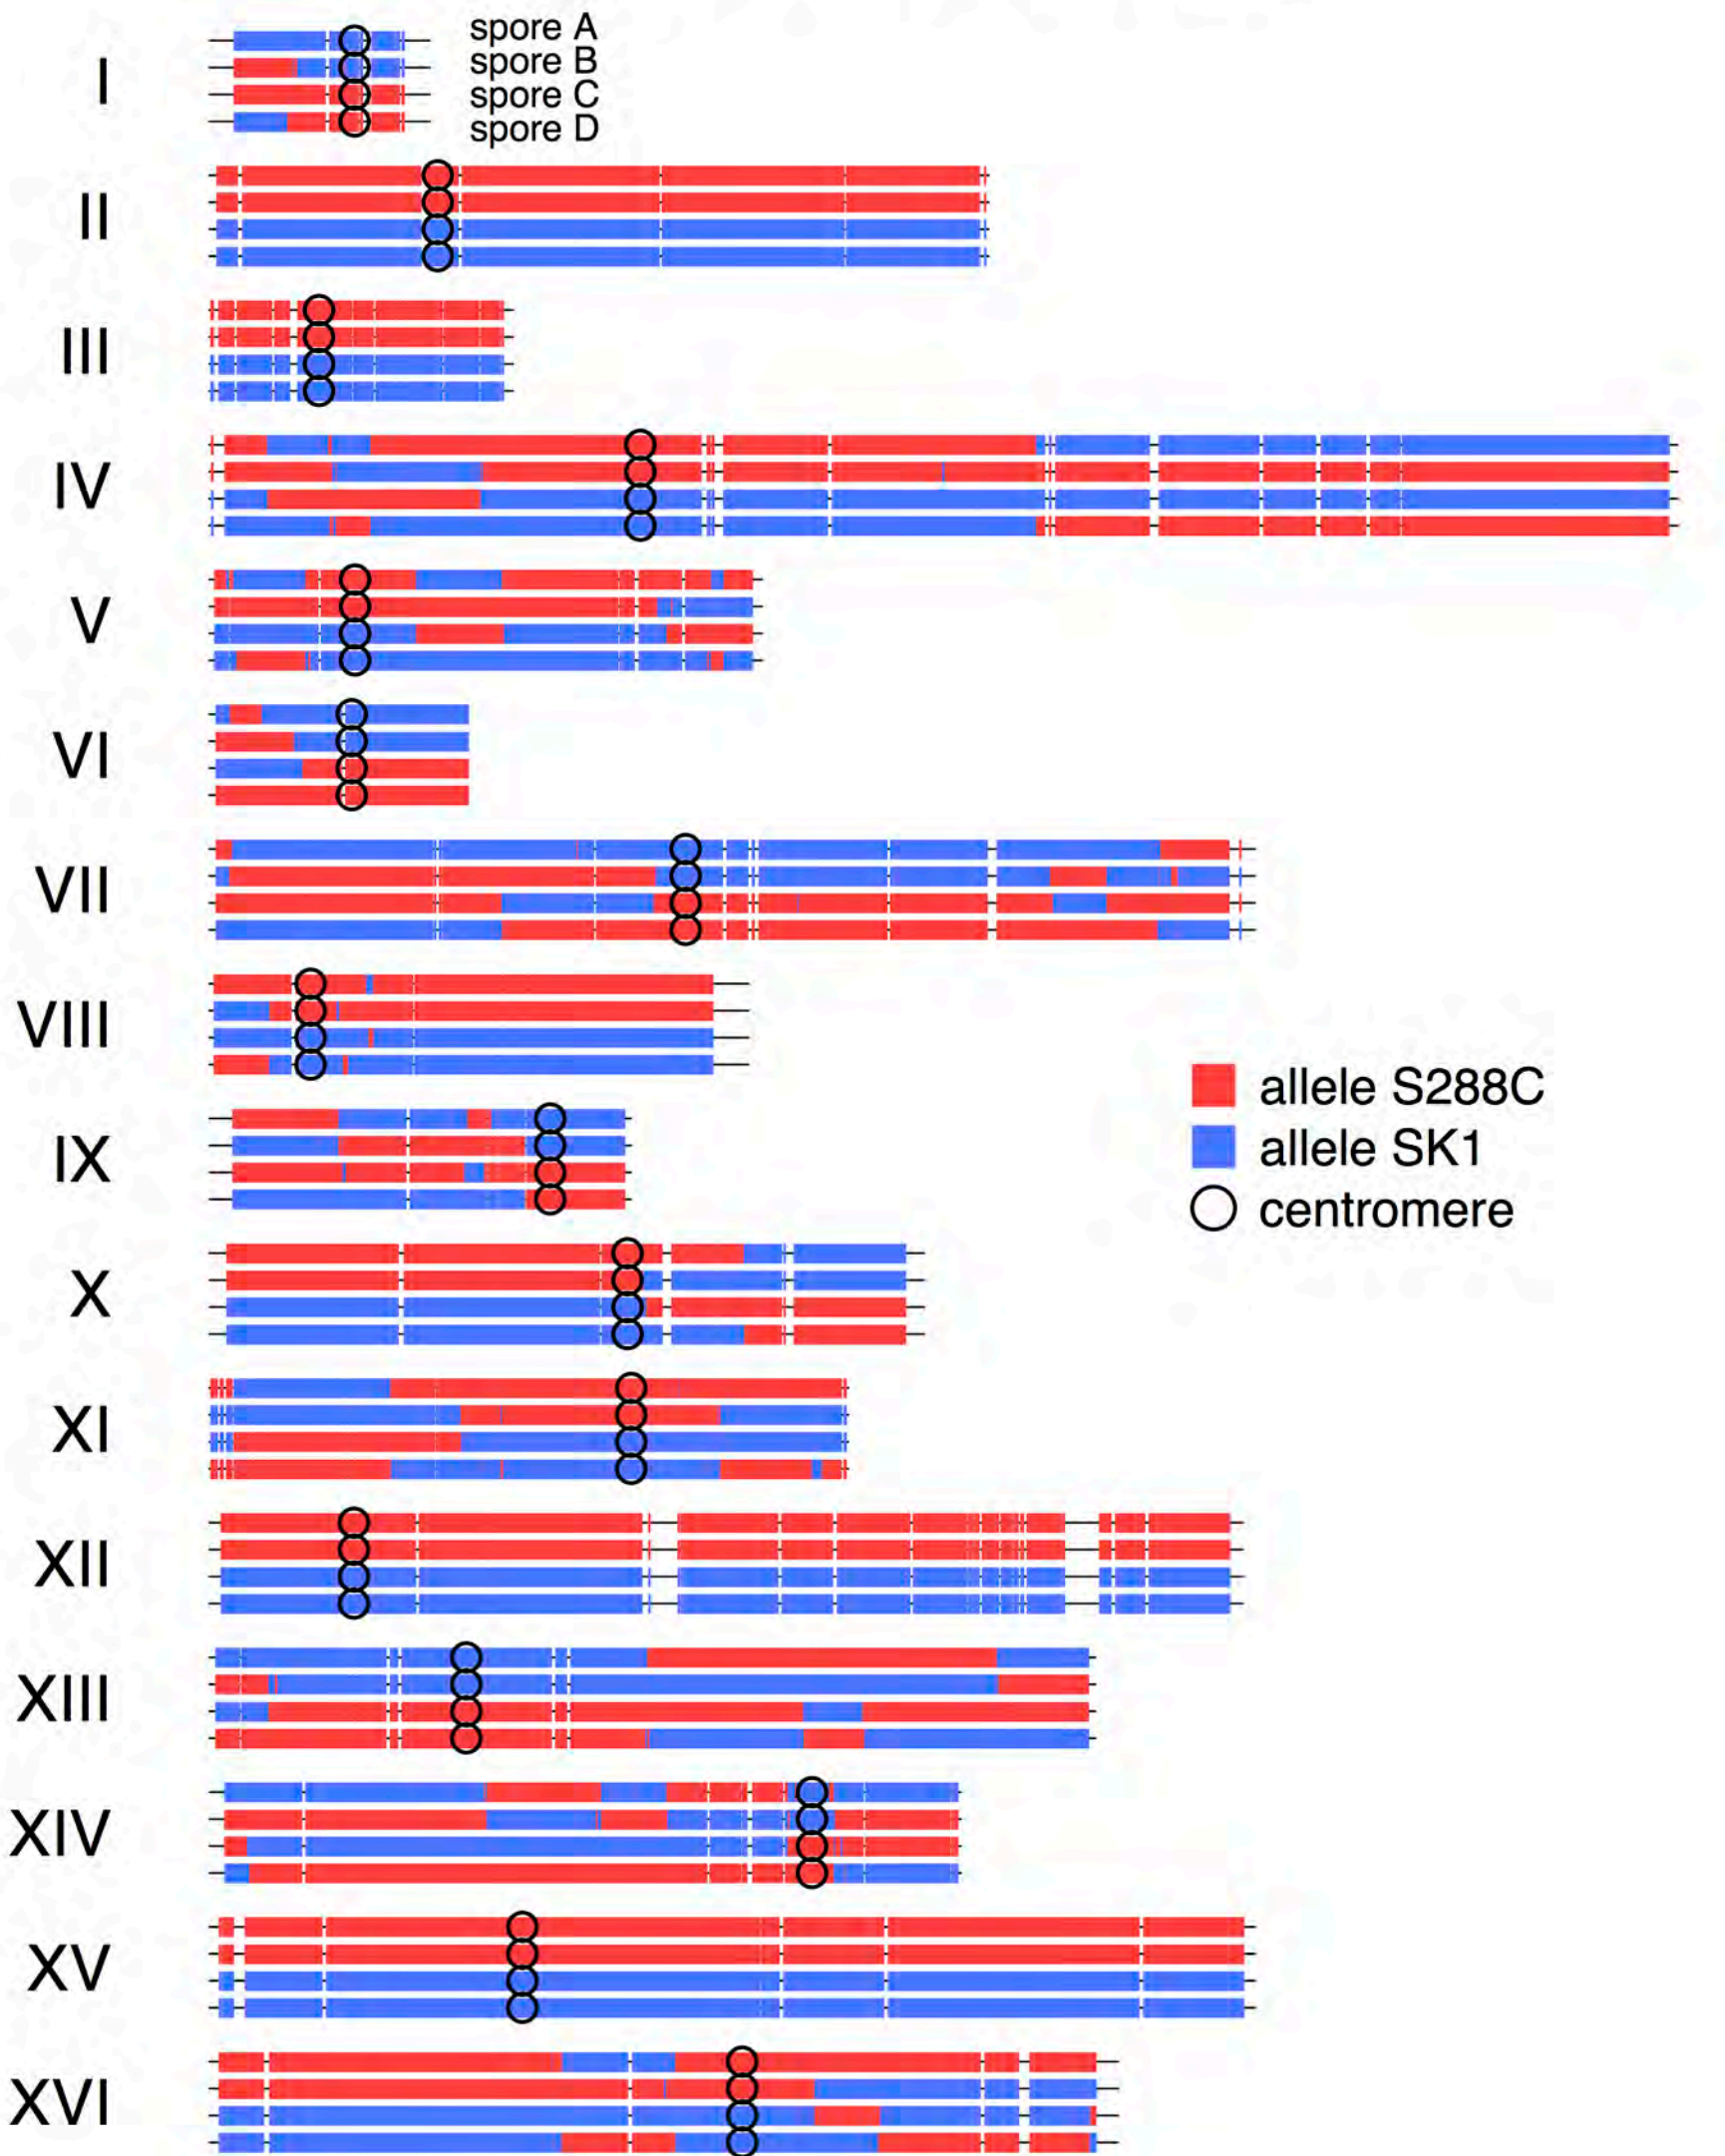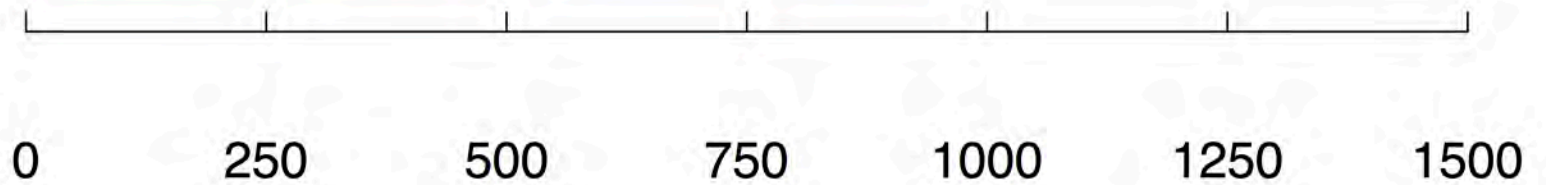

# hed1\_dmc1\_tetrad\_7

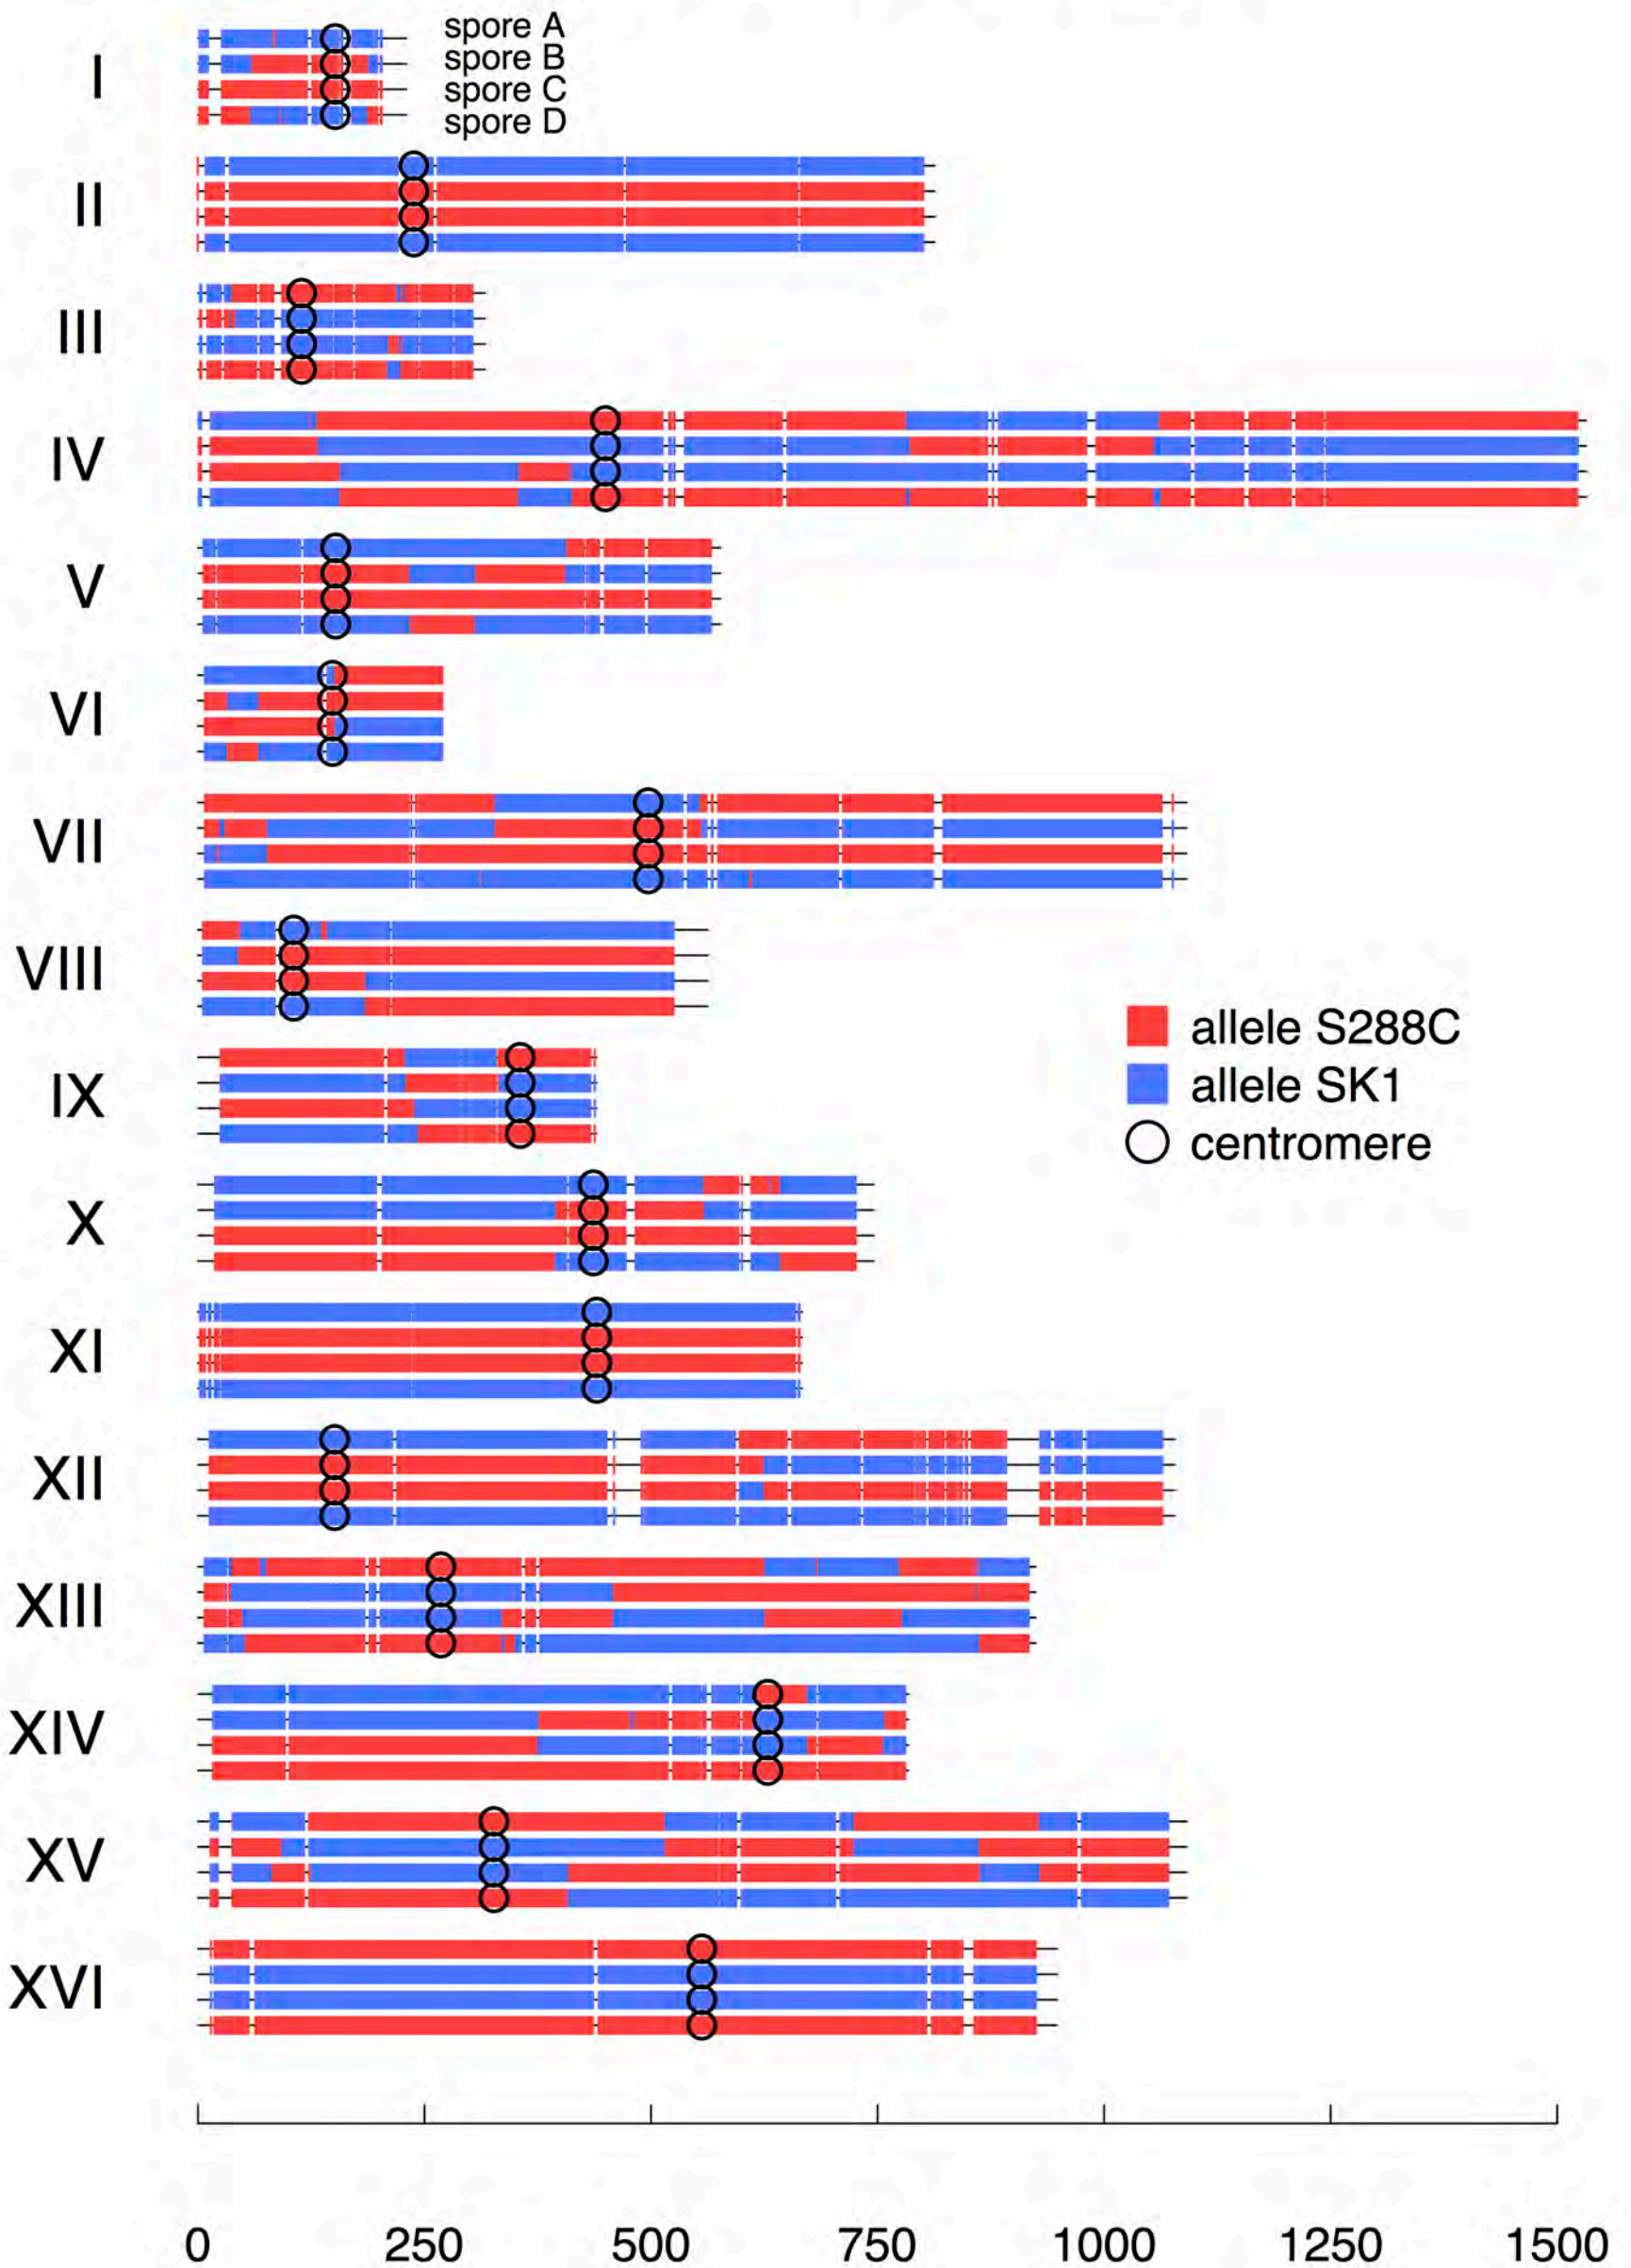

# hed1\_dmc1\_tetrad\_8

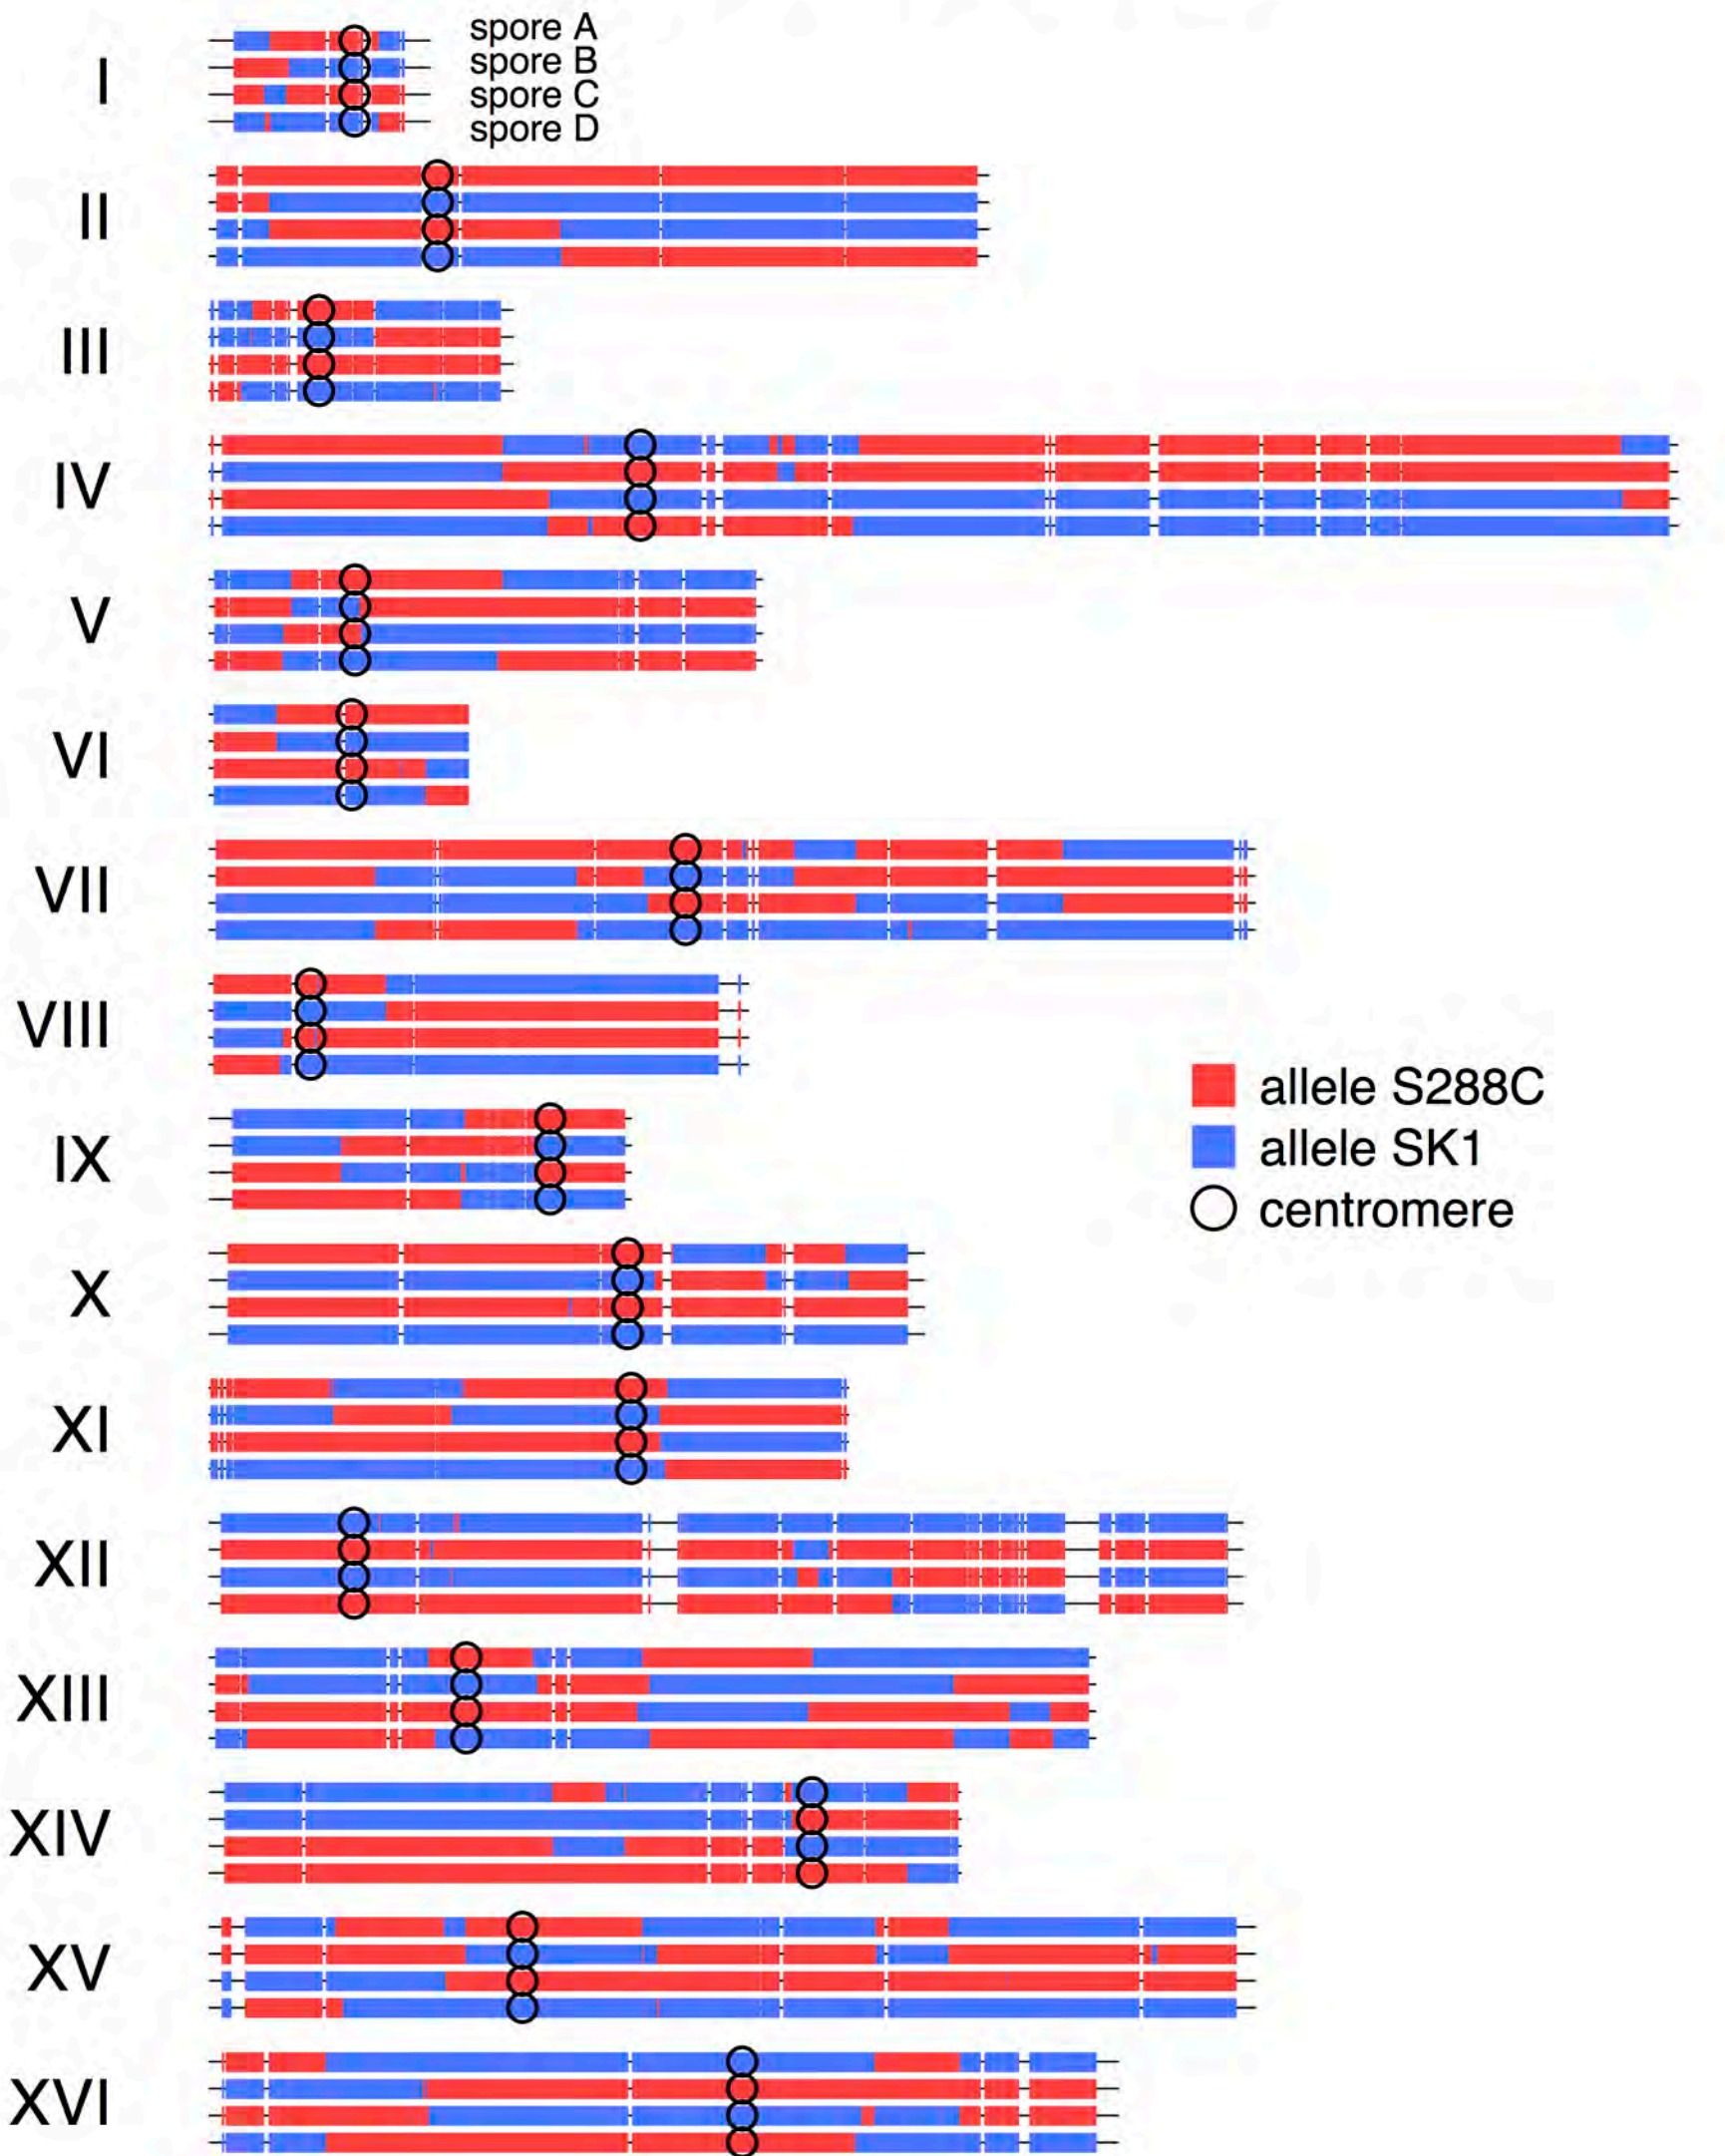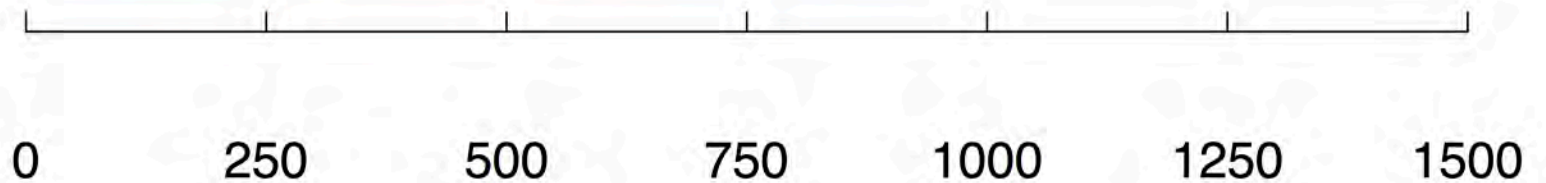

# hed1\_dmc1\_tetrad\_9

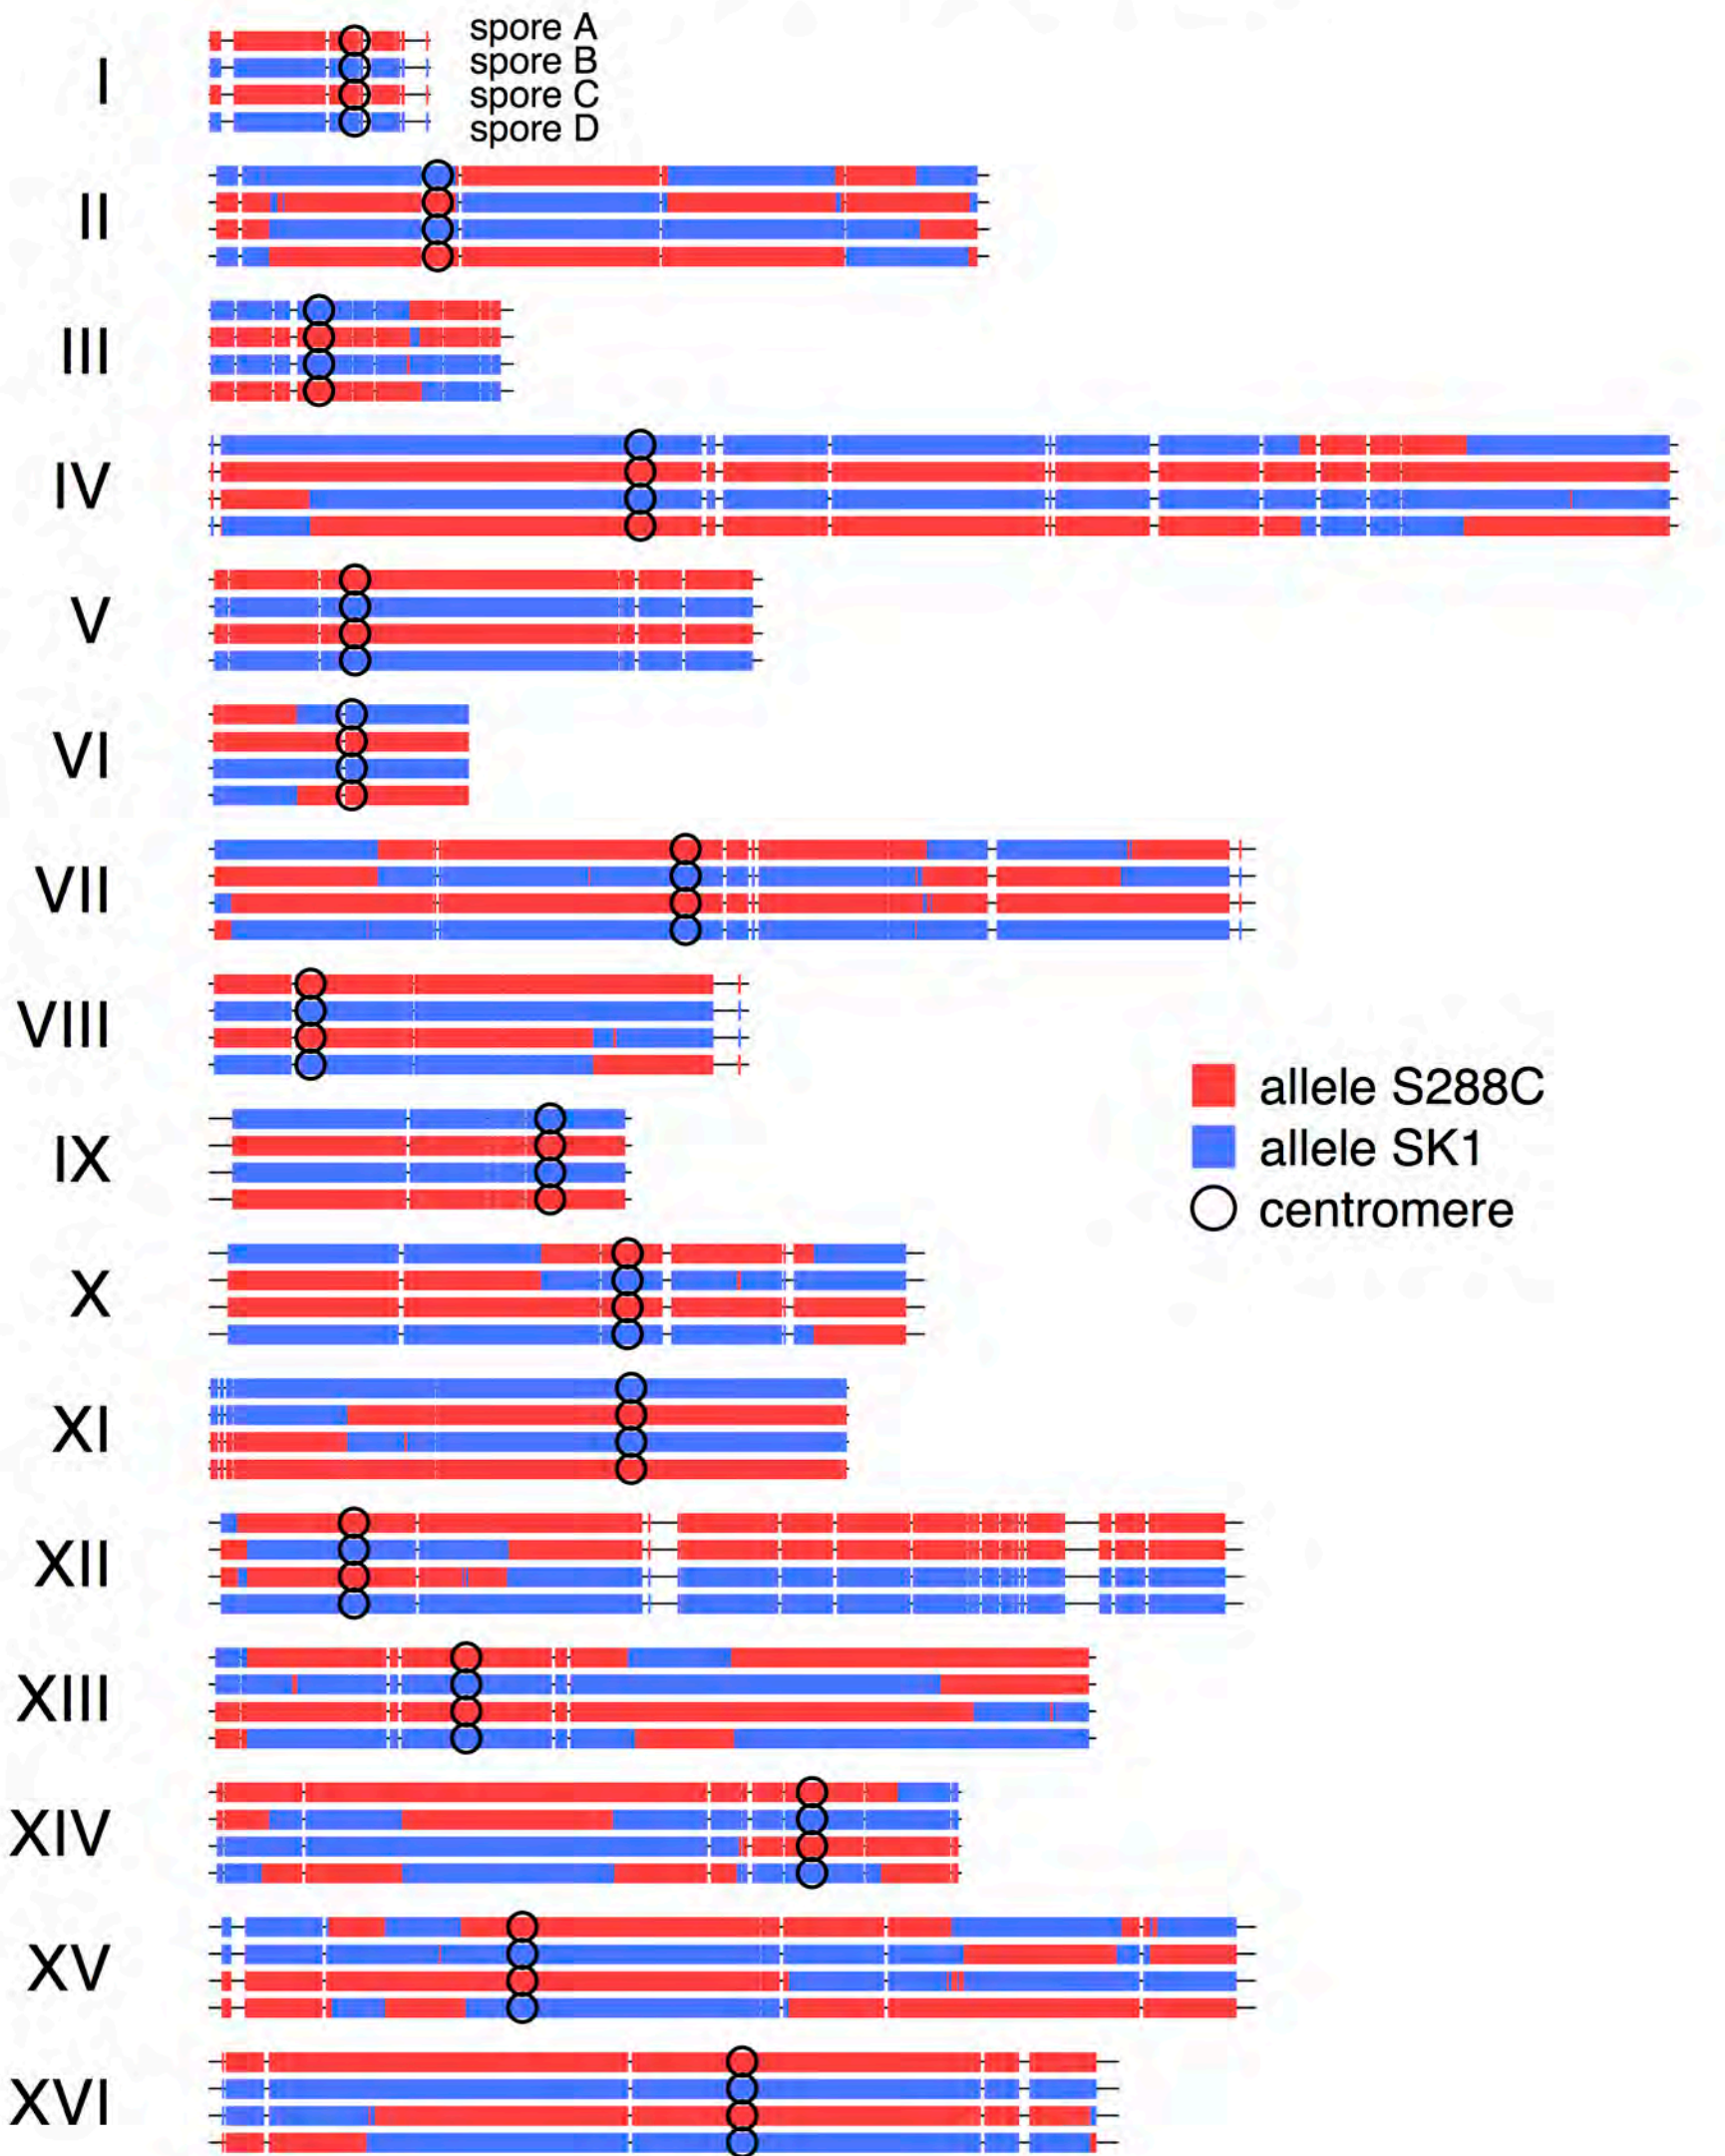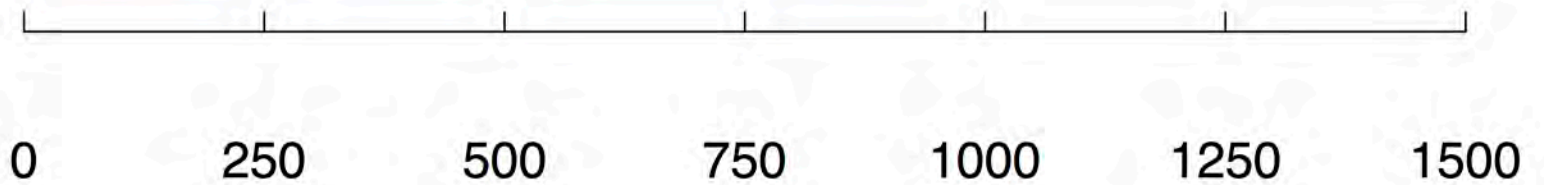

# hed1\_dmc1\_tetrad\_10

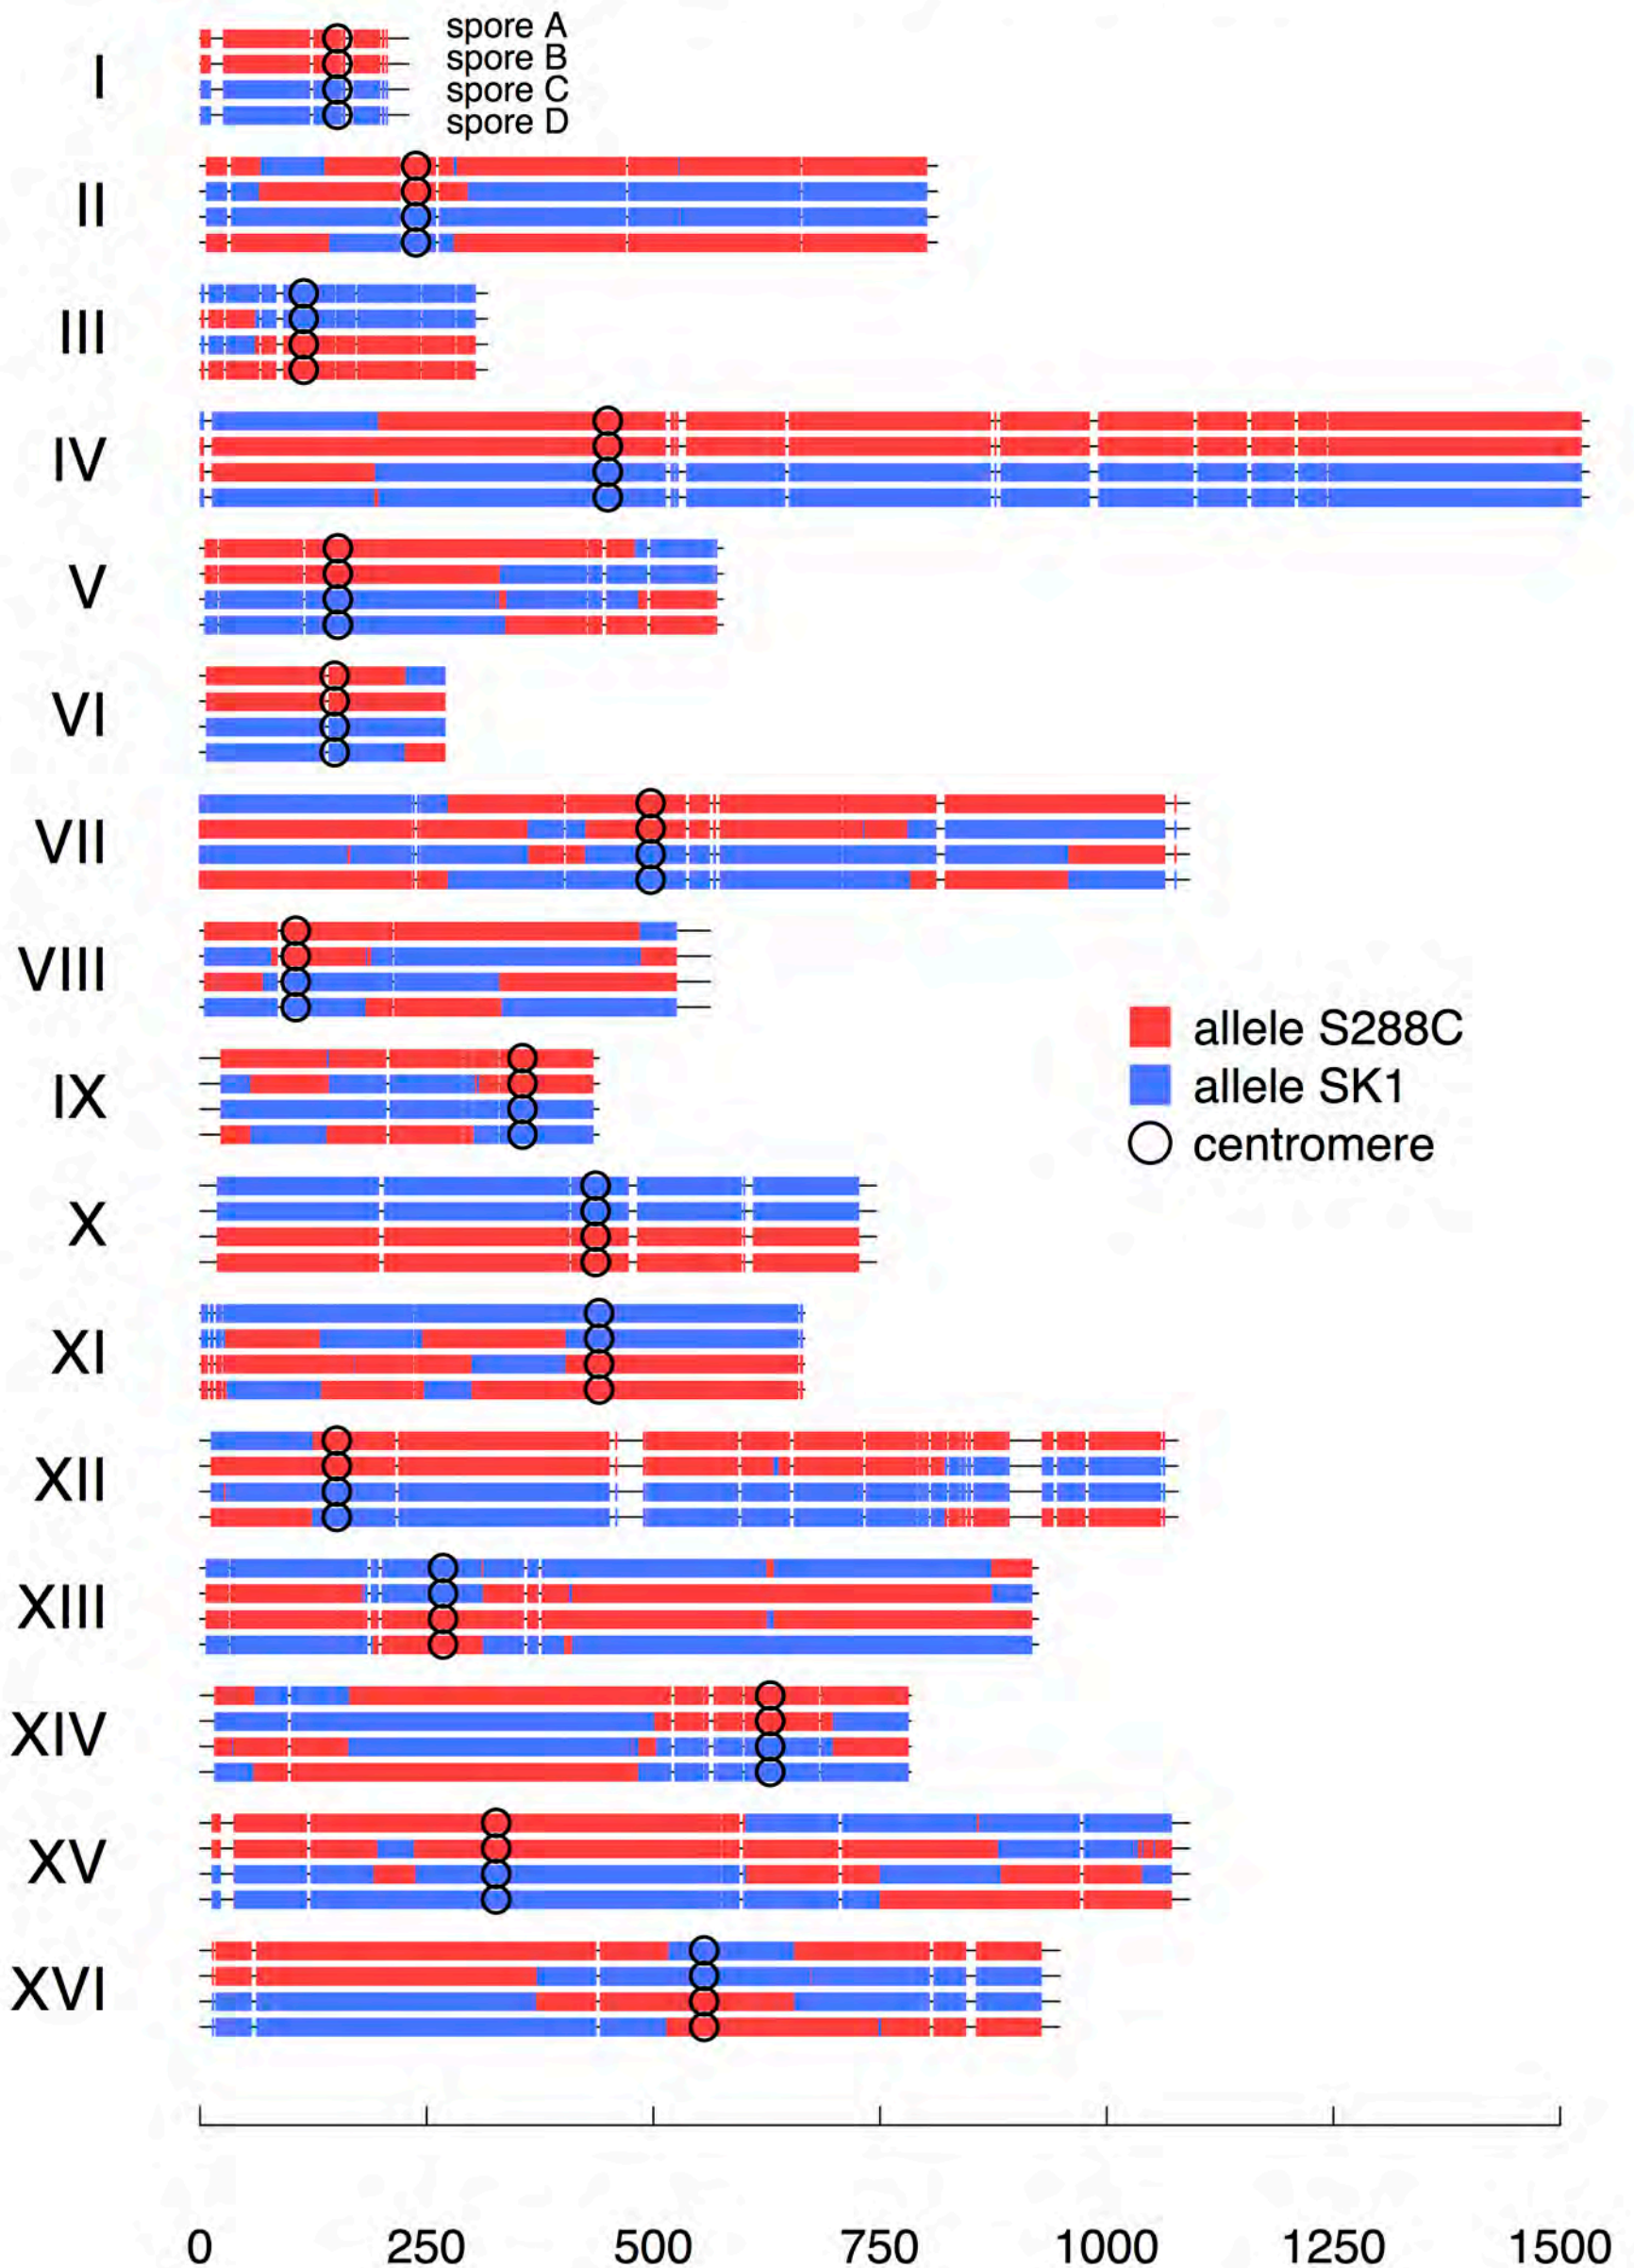

# hed1\_dmc1\_tetrad\_11

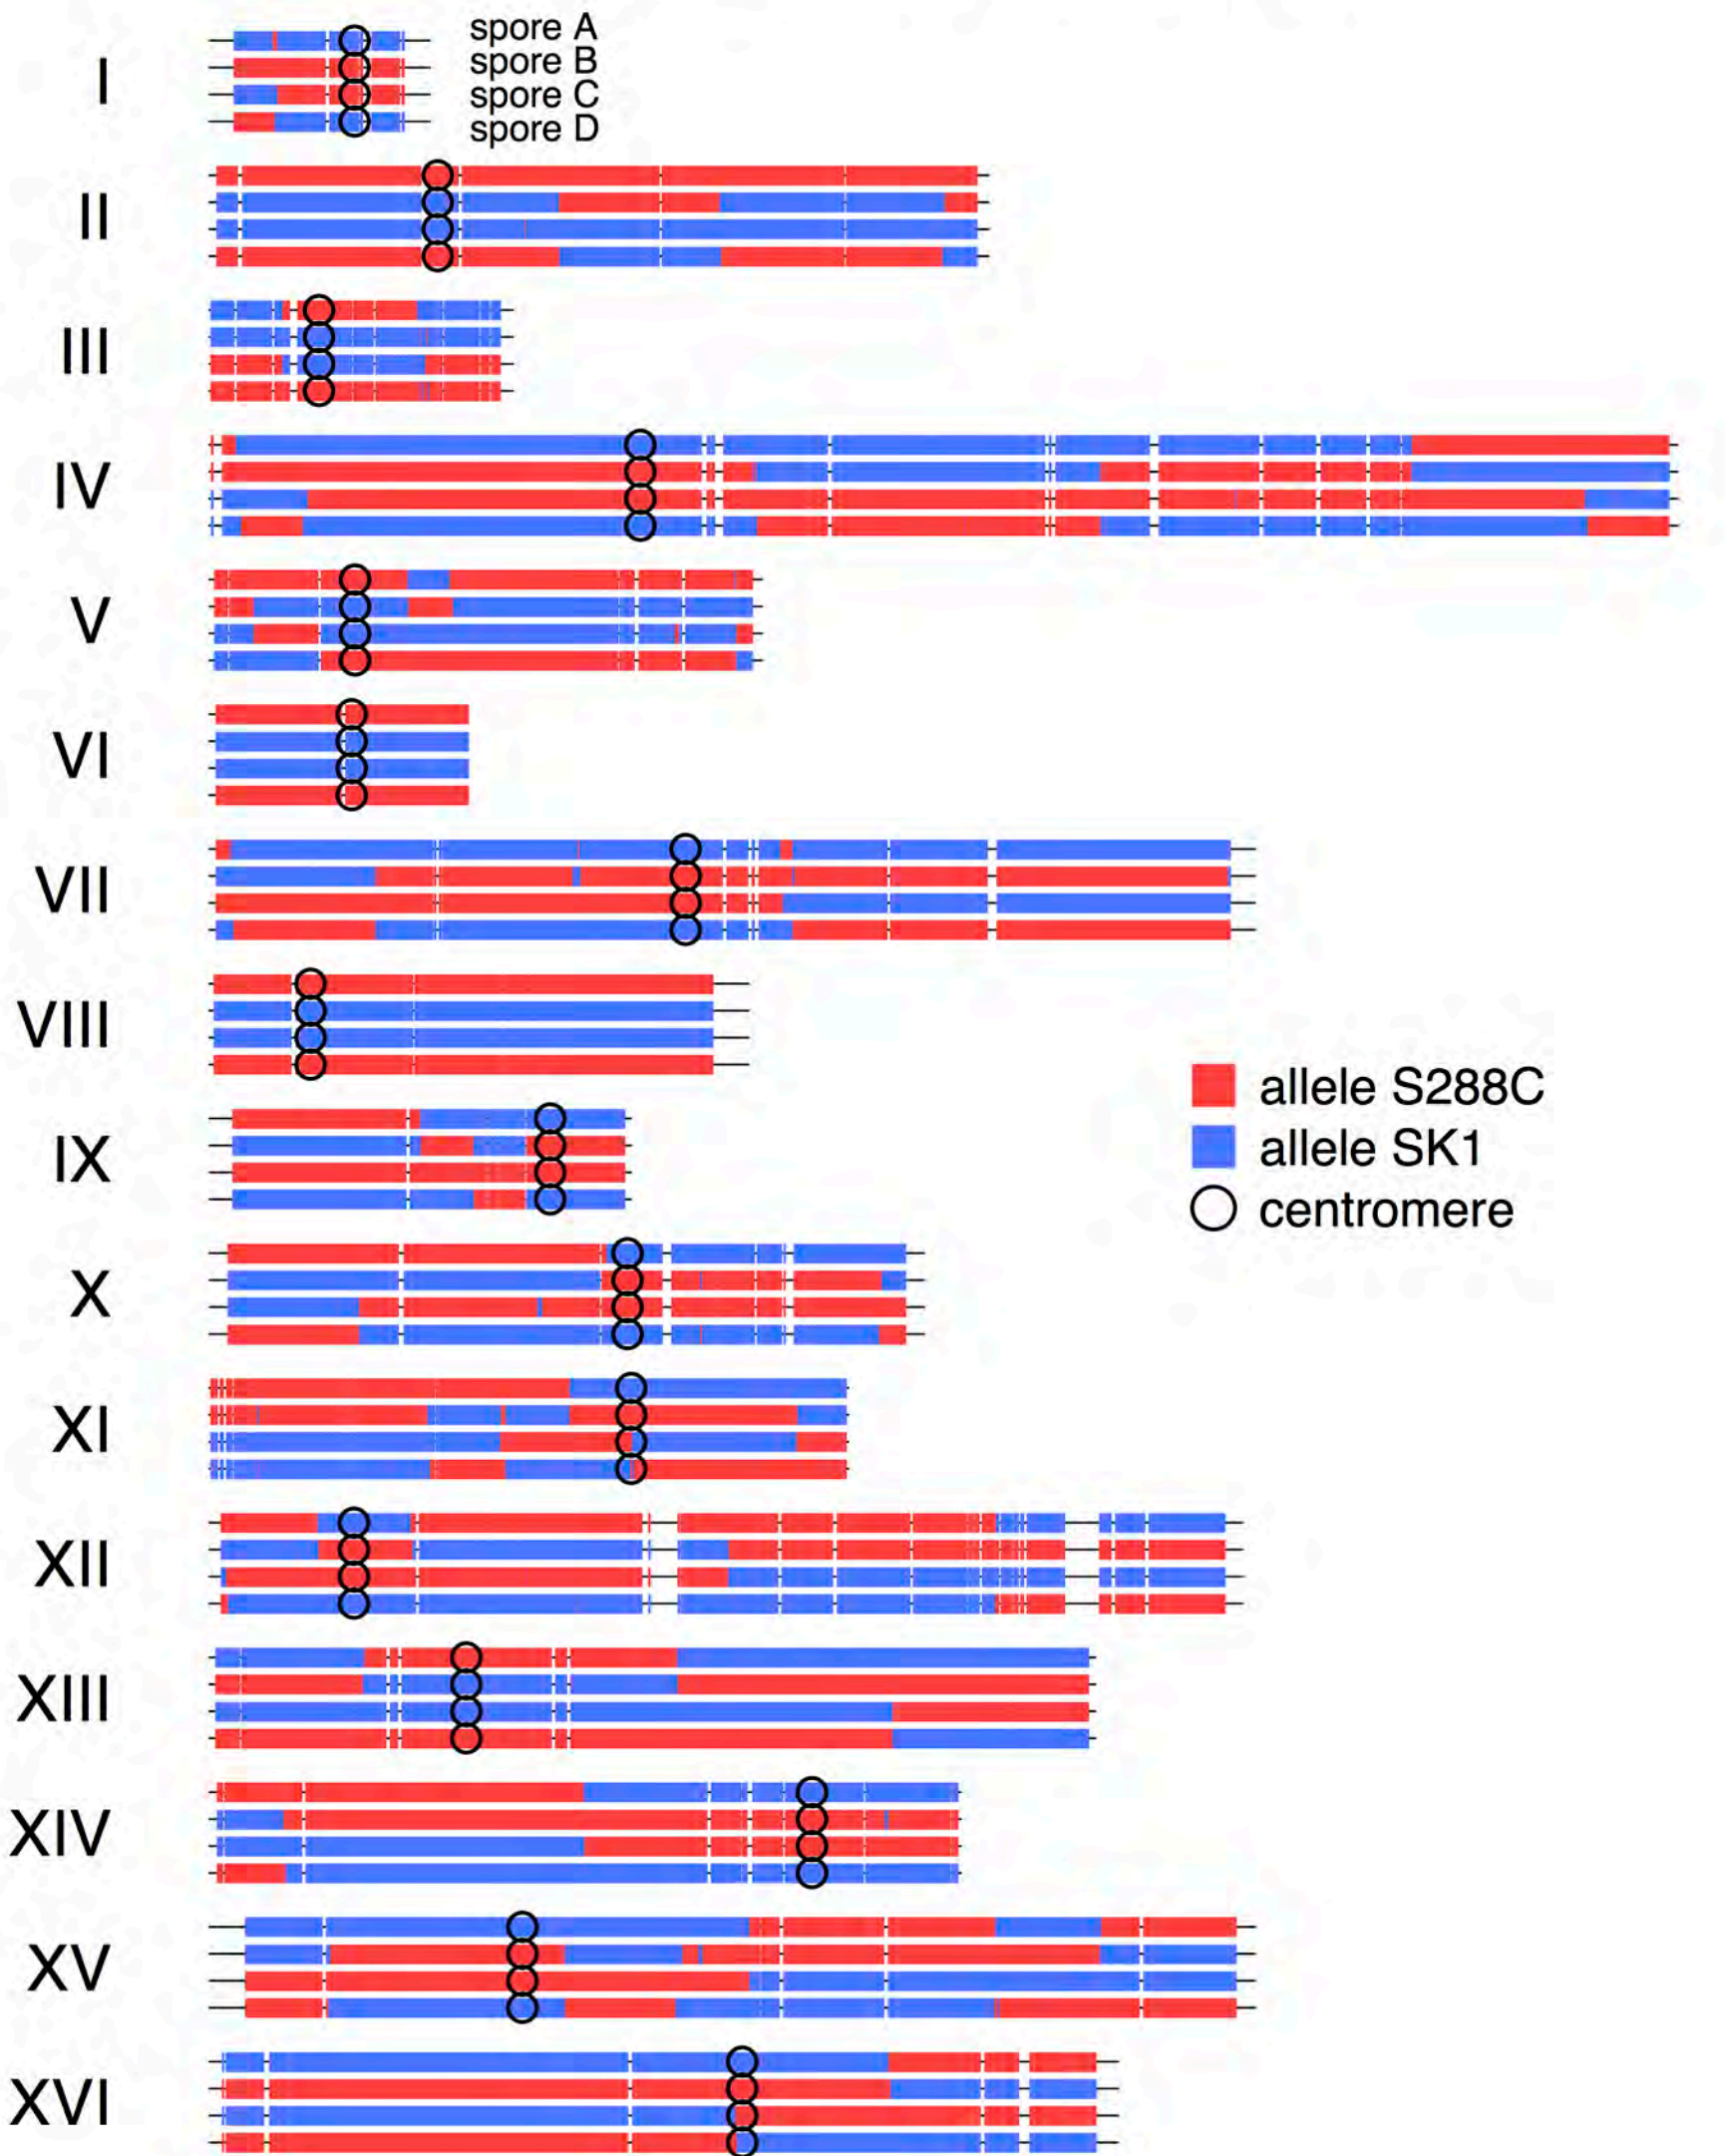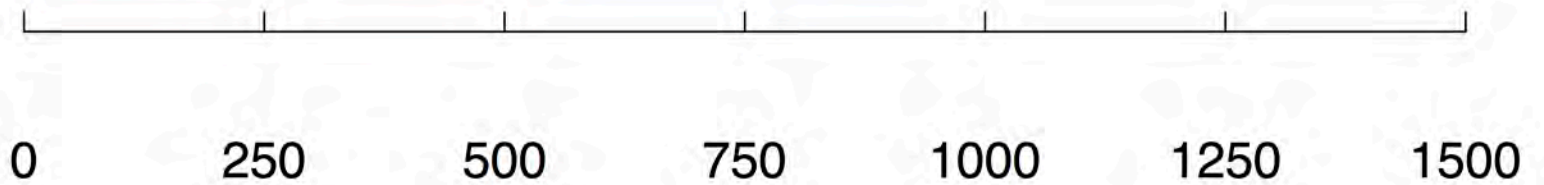

# hed1\_dmc1\_tetrad\_12

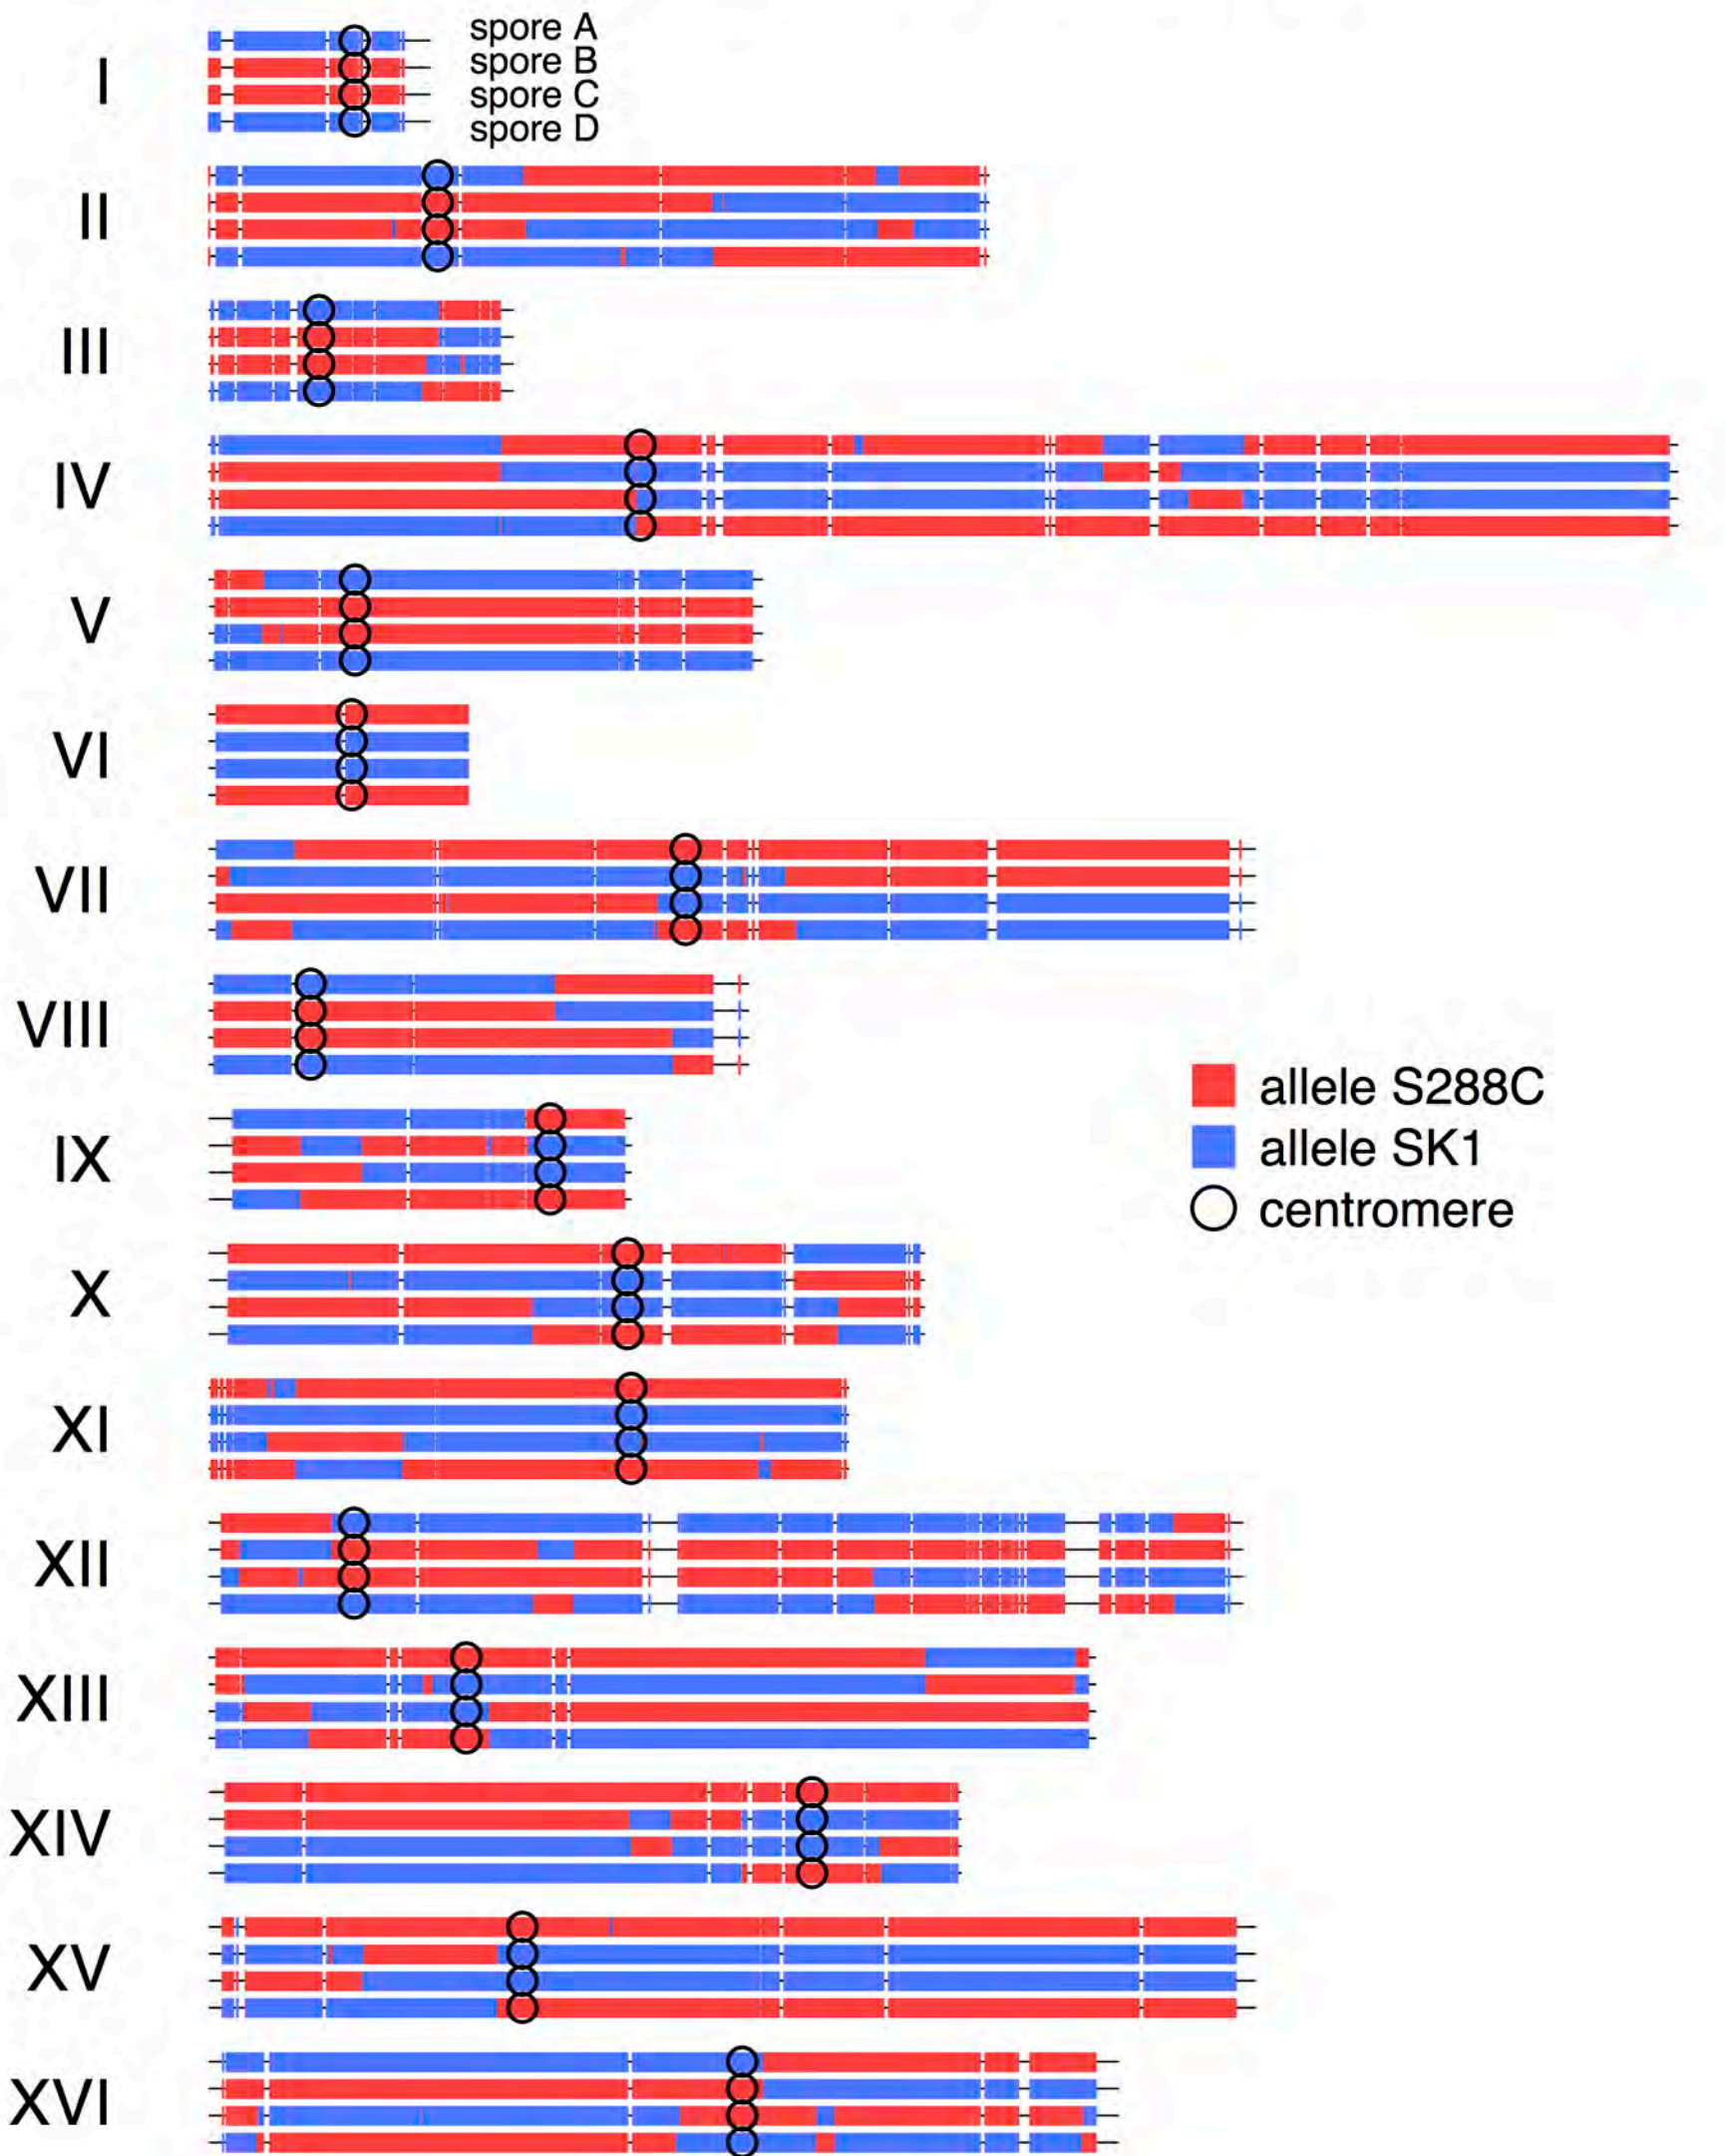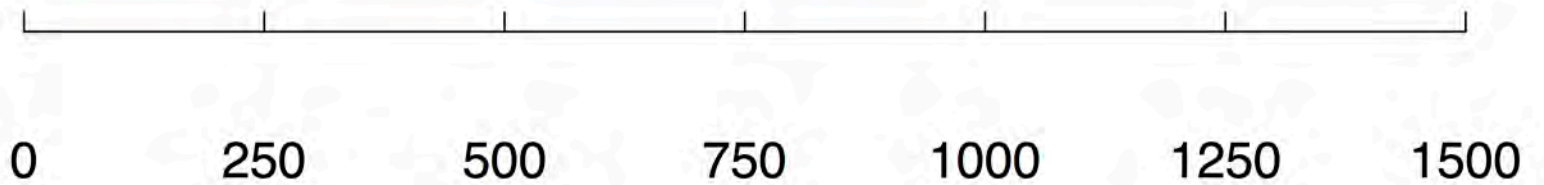



# hed1-3A\_dmc1\_tetrad\_1

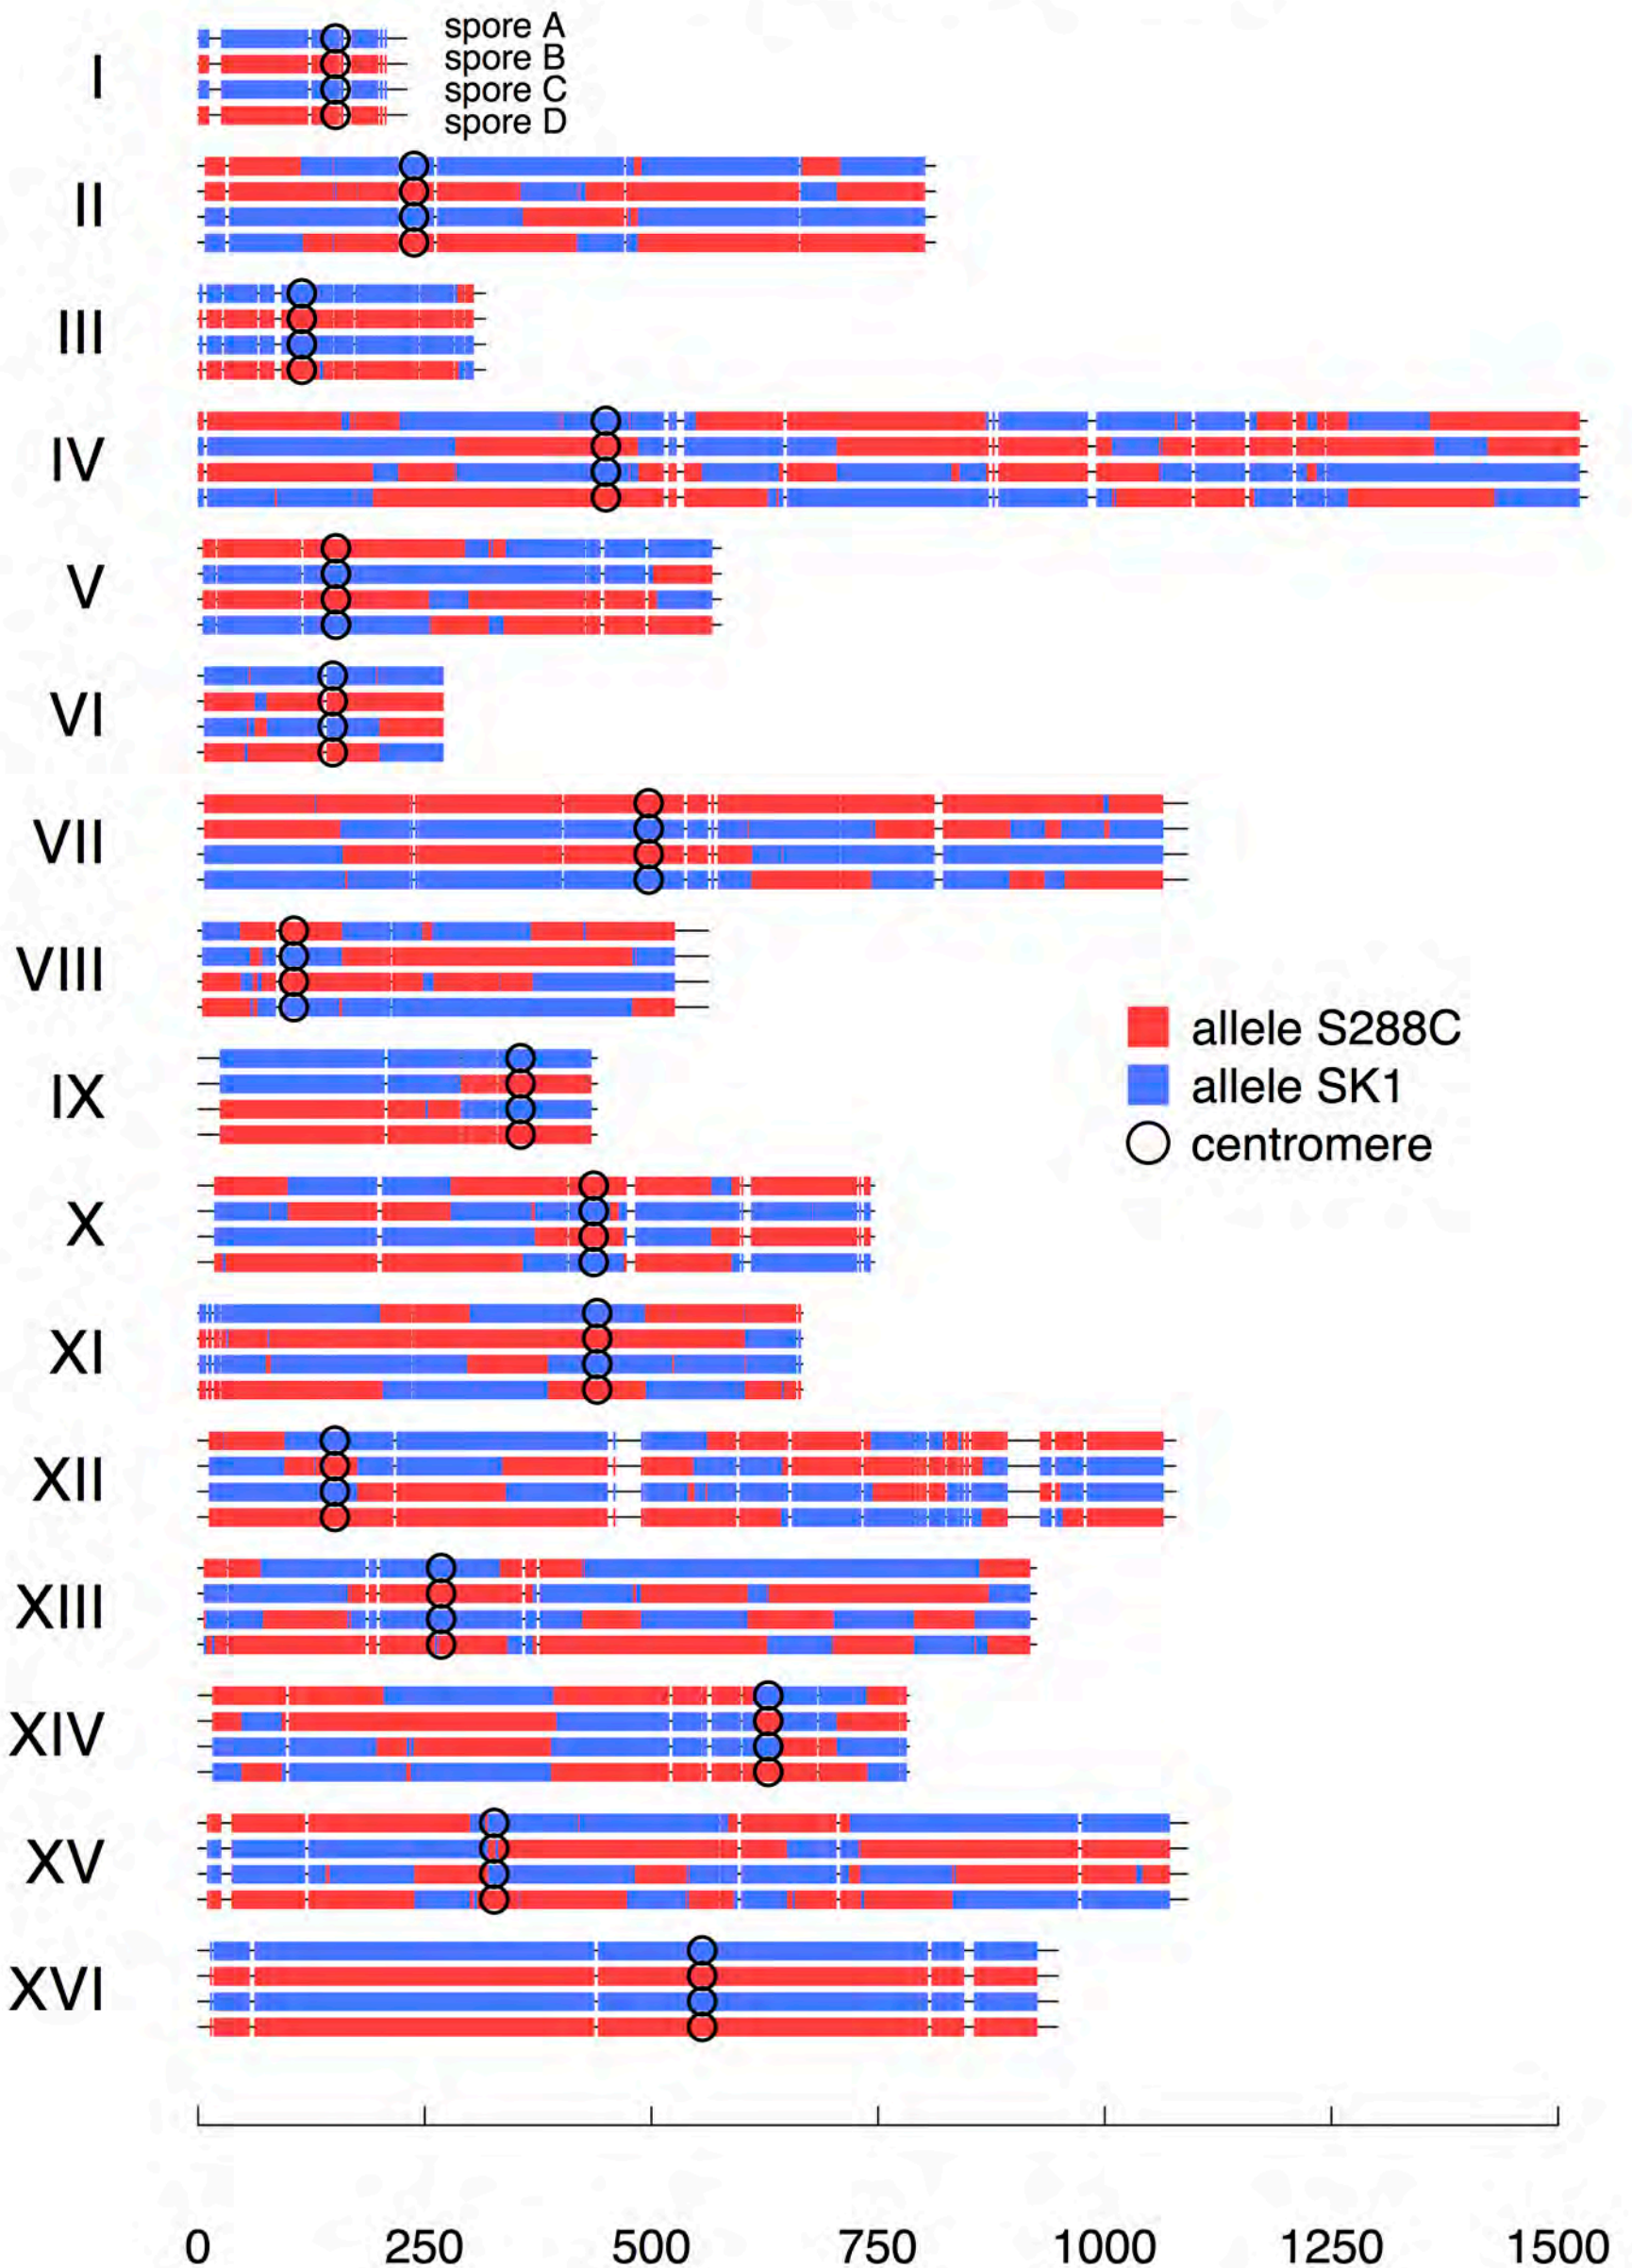

# hed1-3A\_dmc1\_tetrad\_2

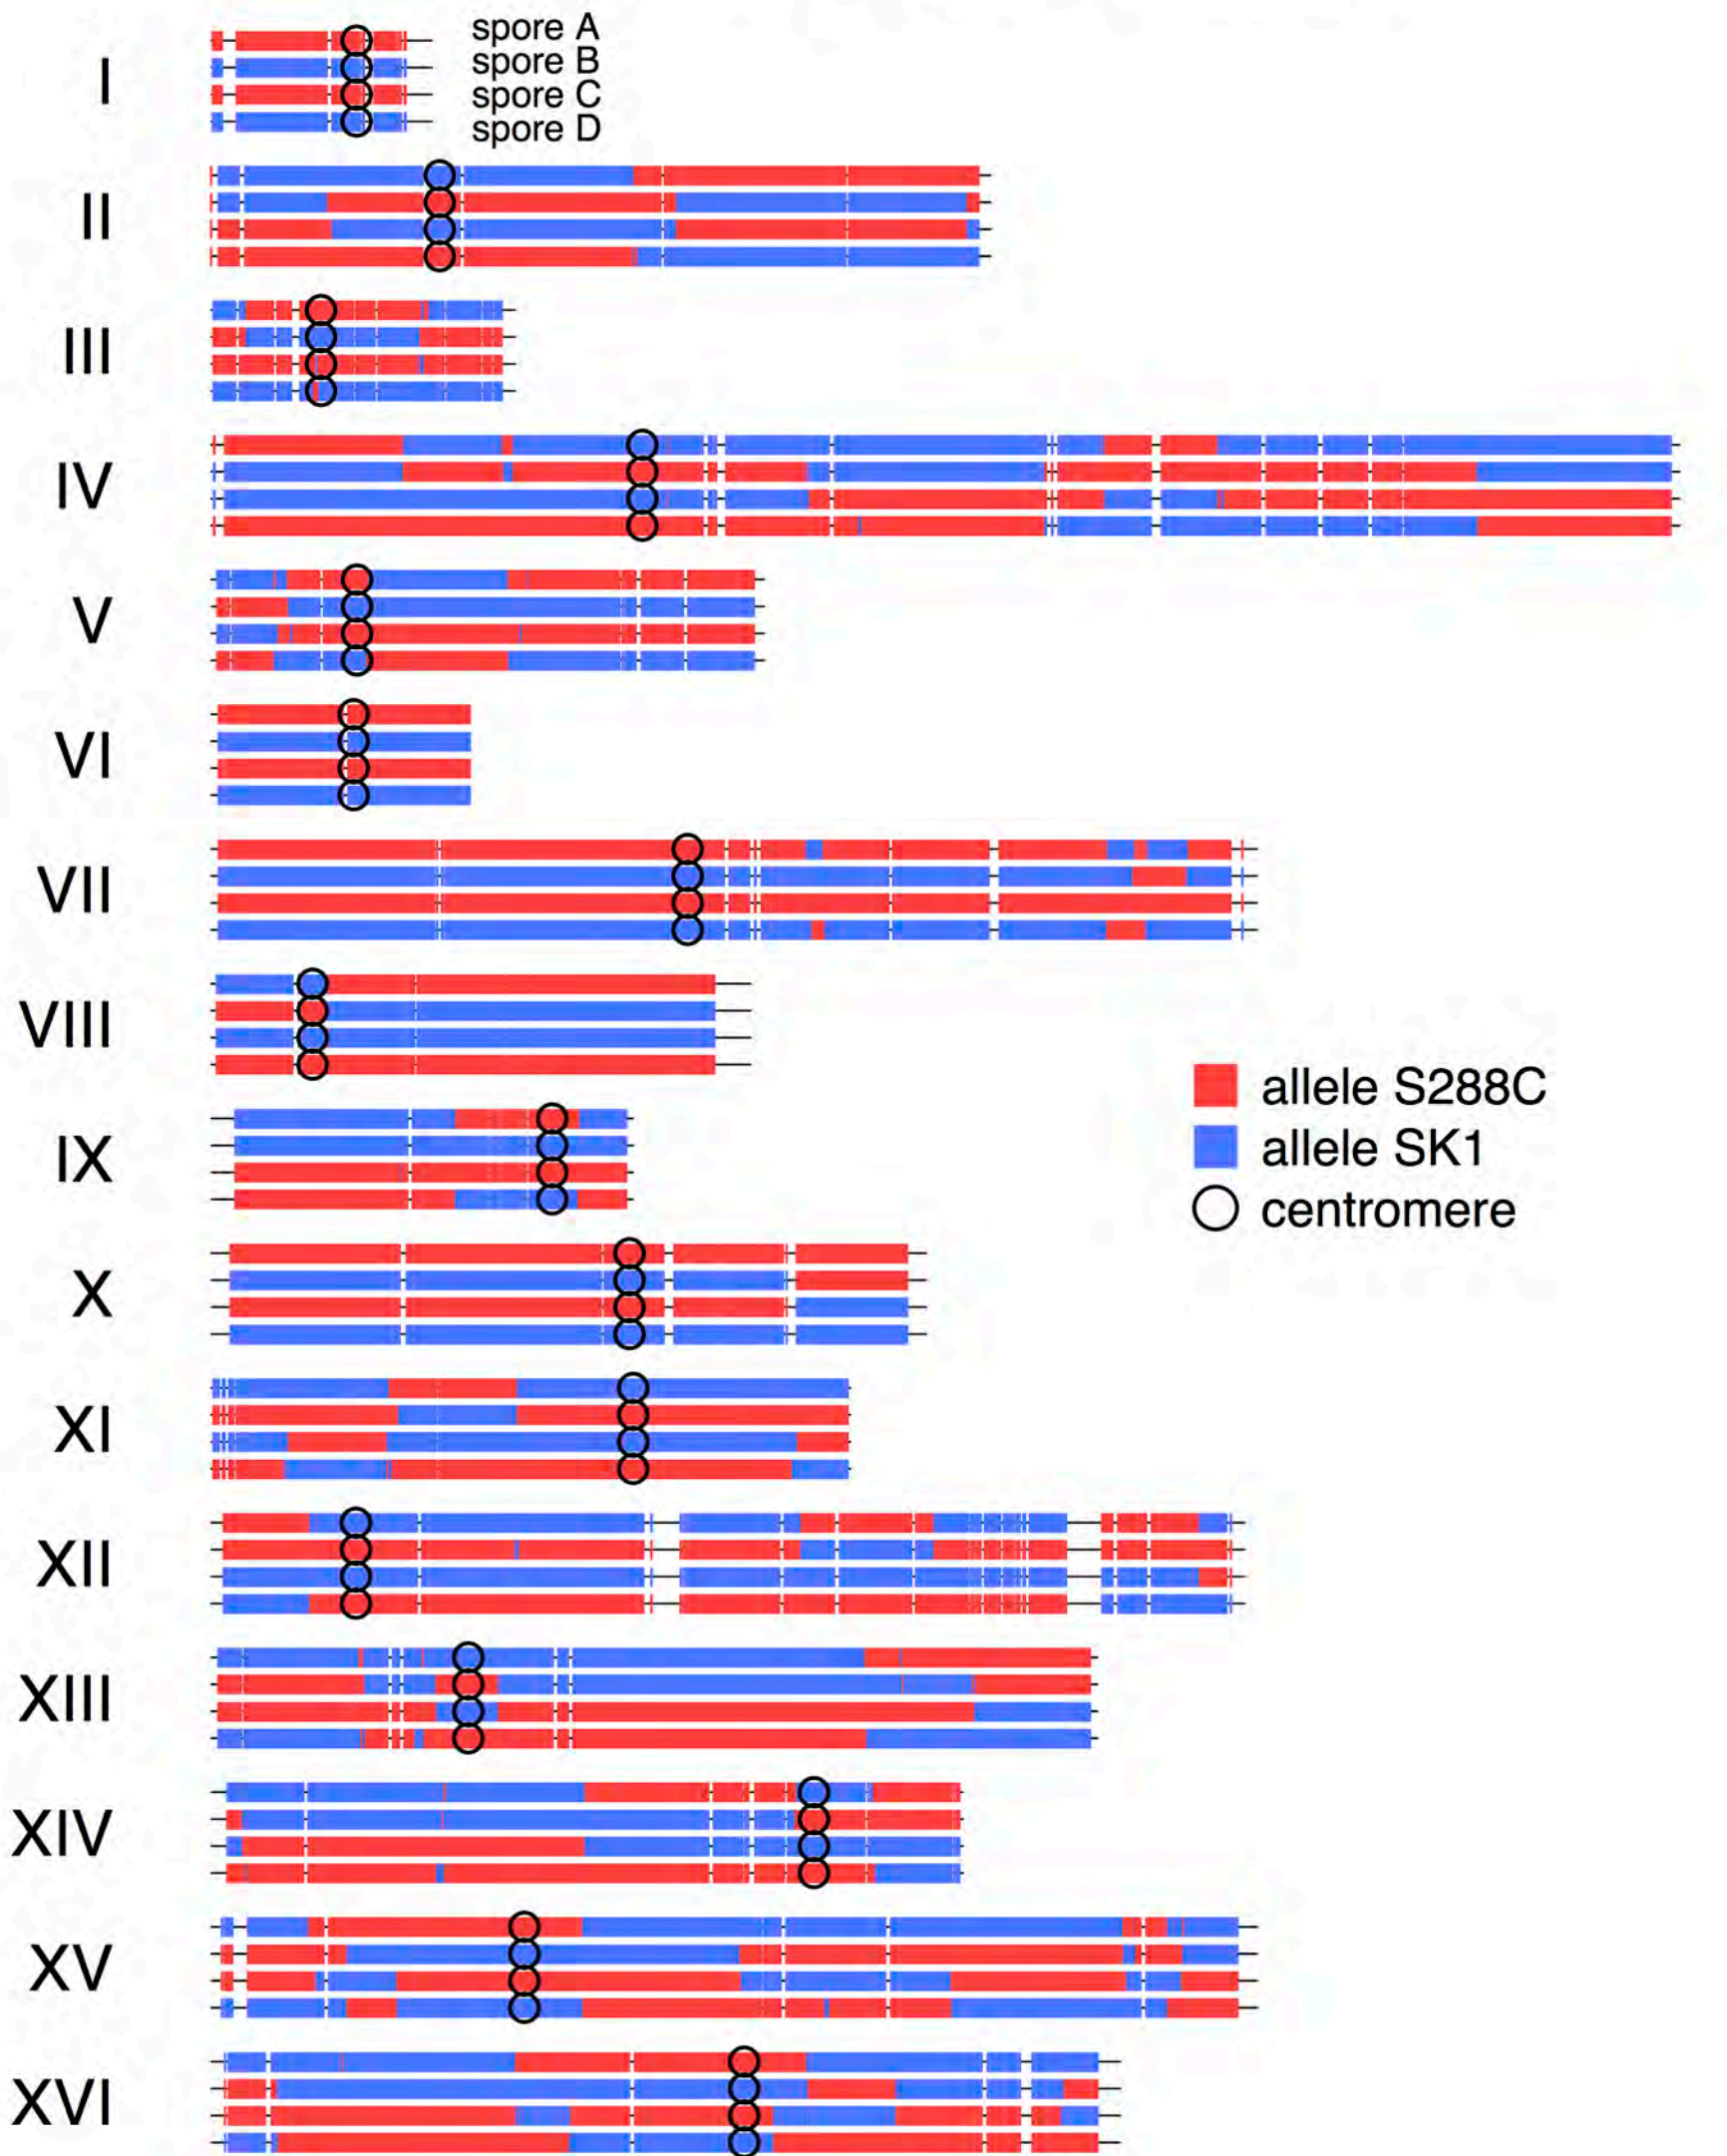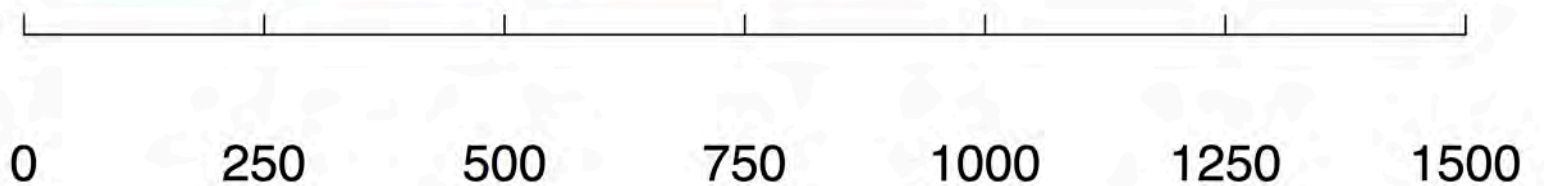

# hed1-3A\_dmc1\_tetrad\_3

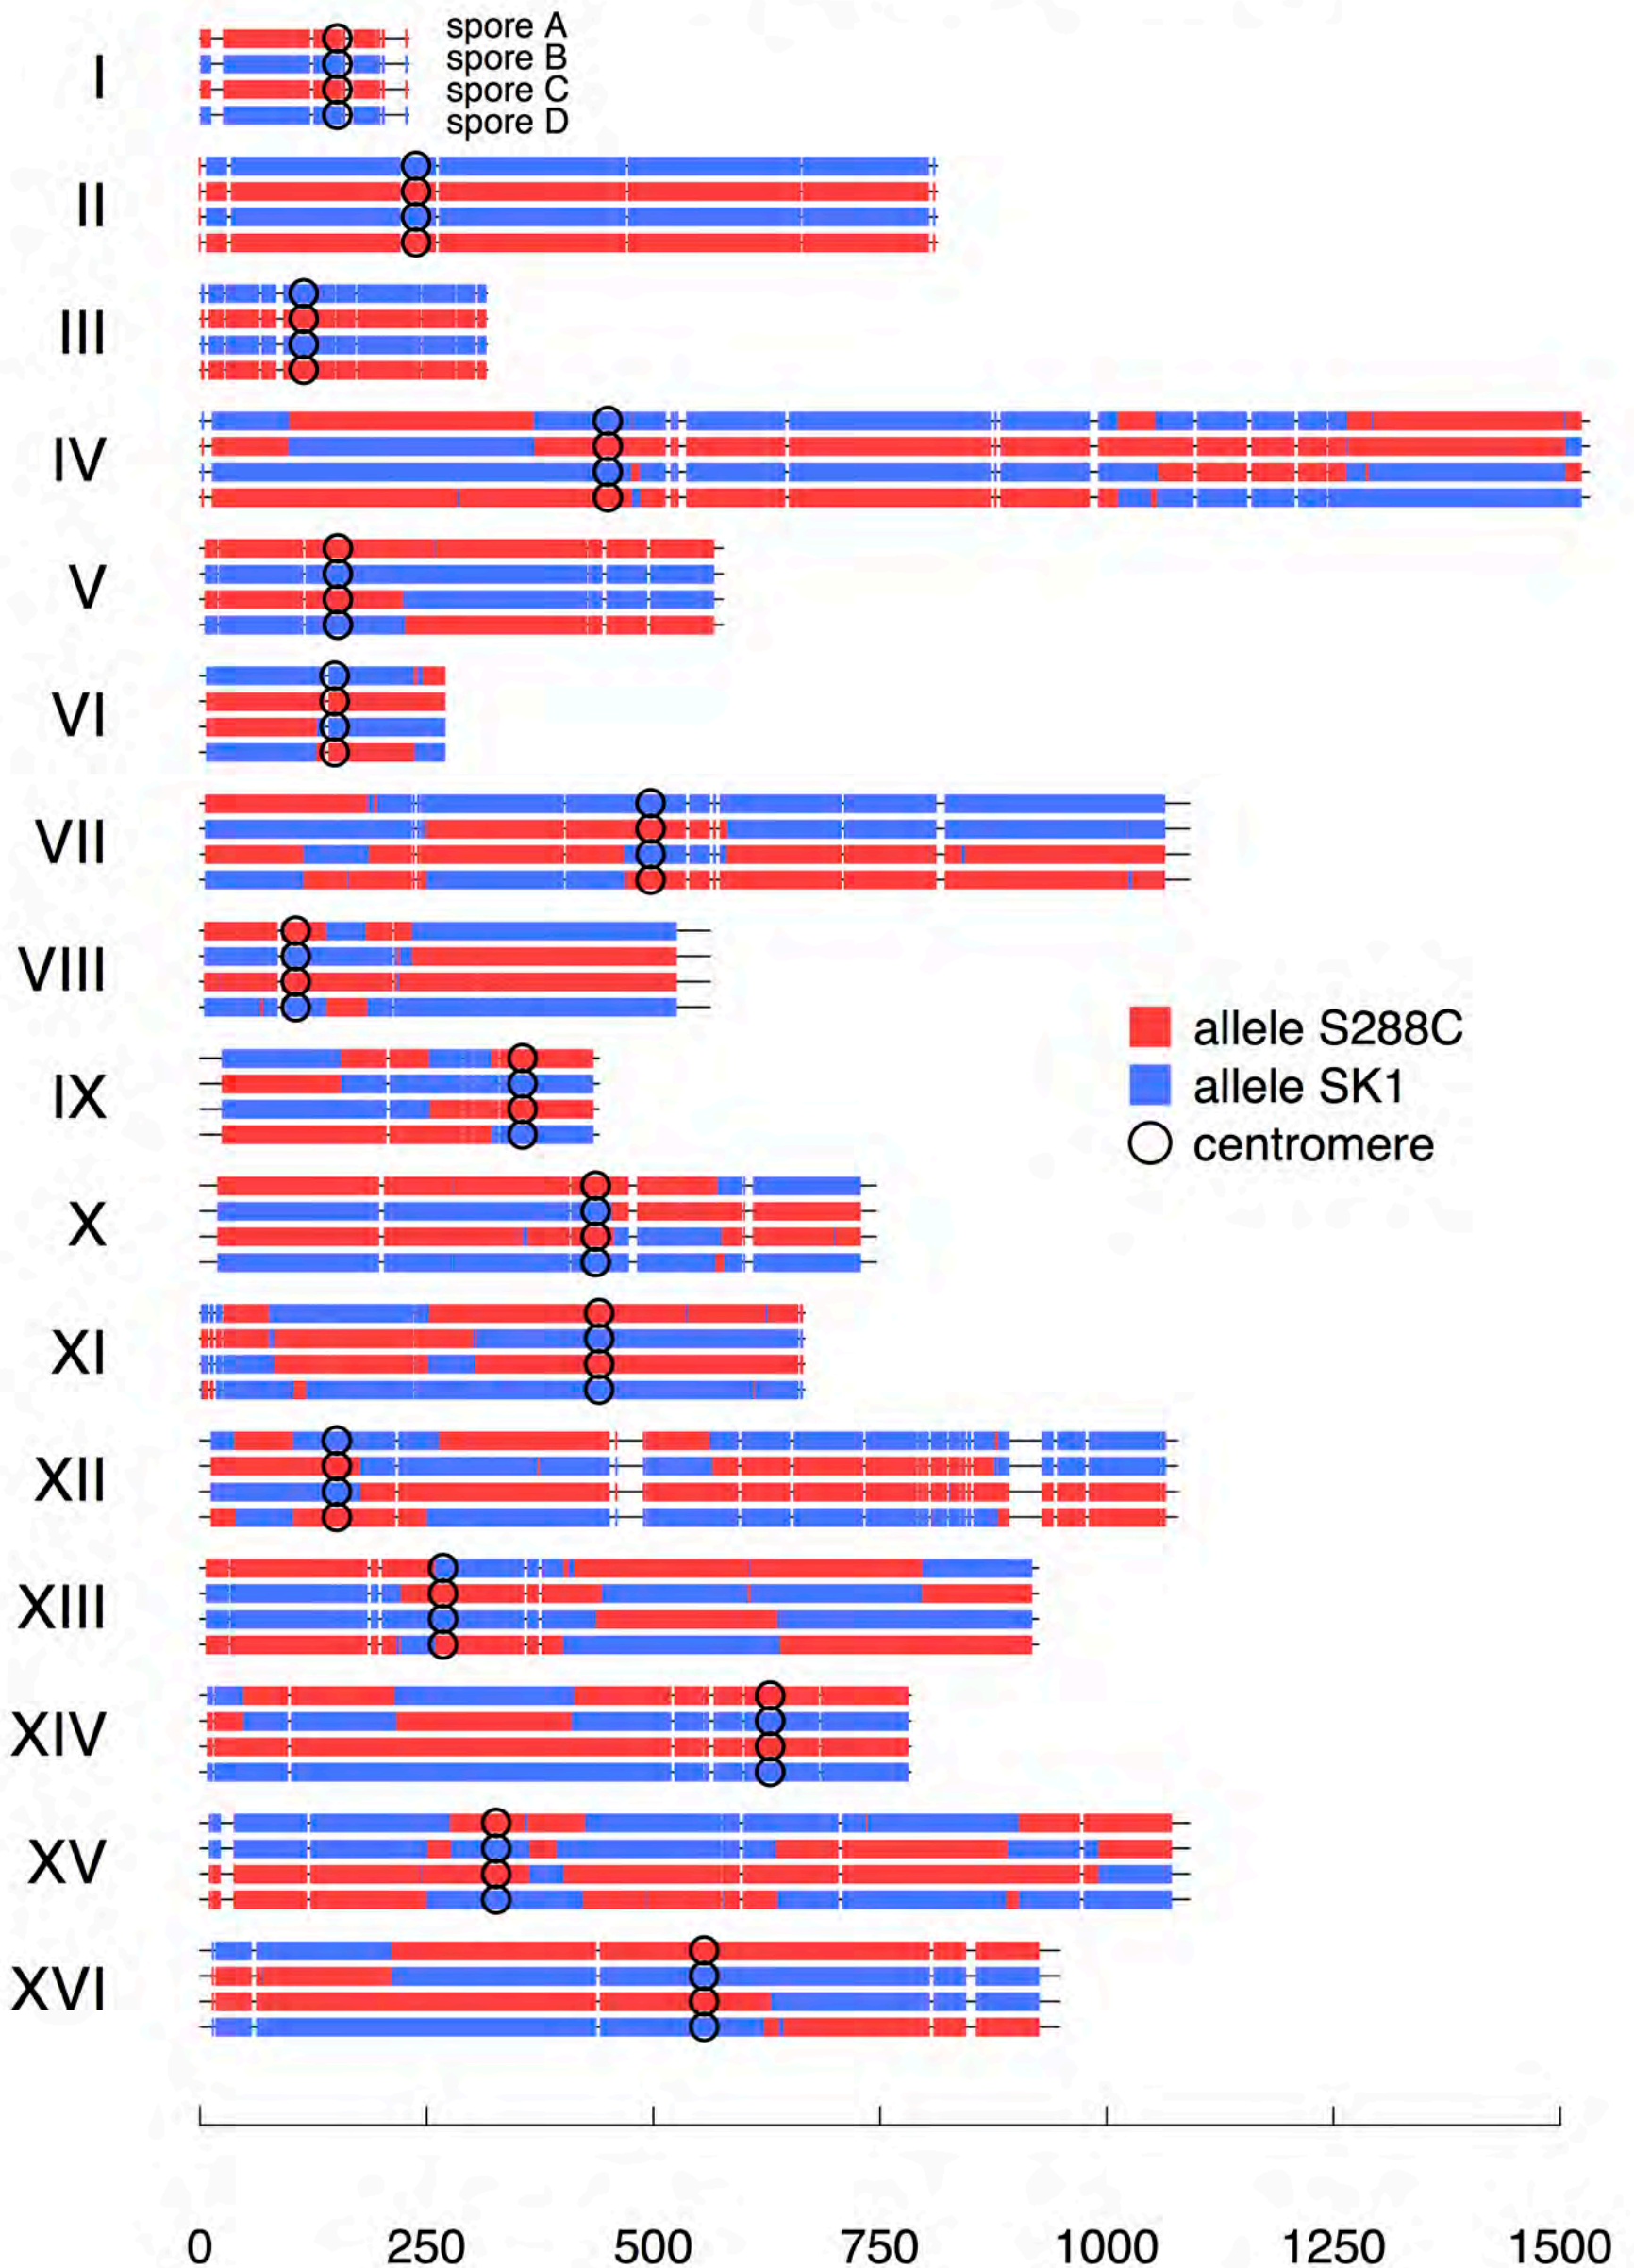

# hed1-3A\_dmc1\_tetrad\_4

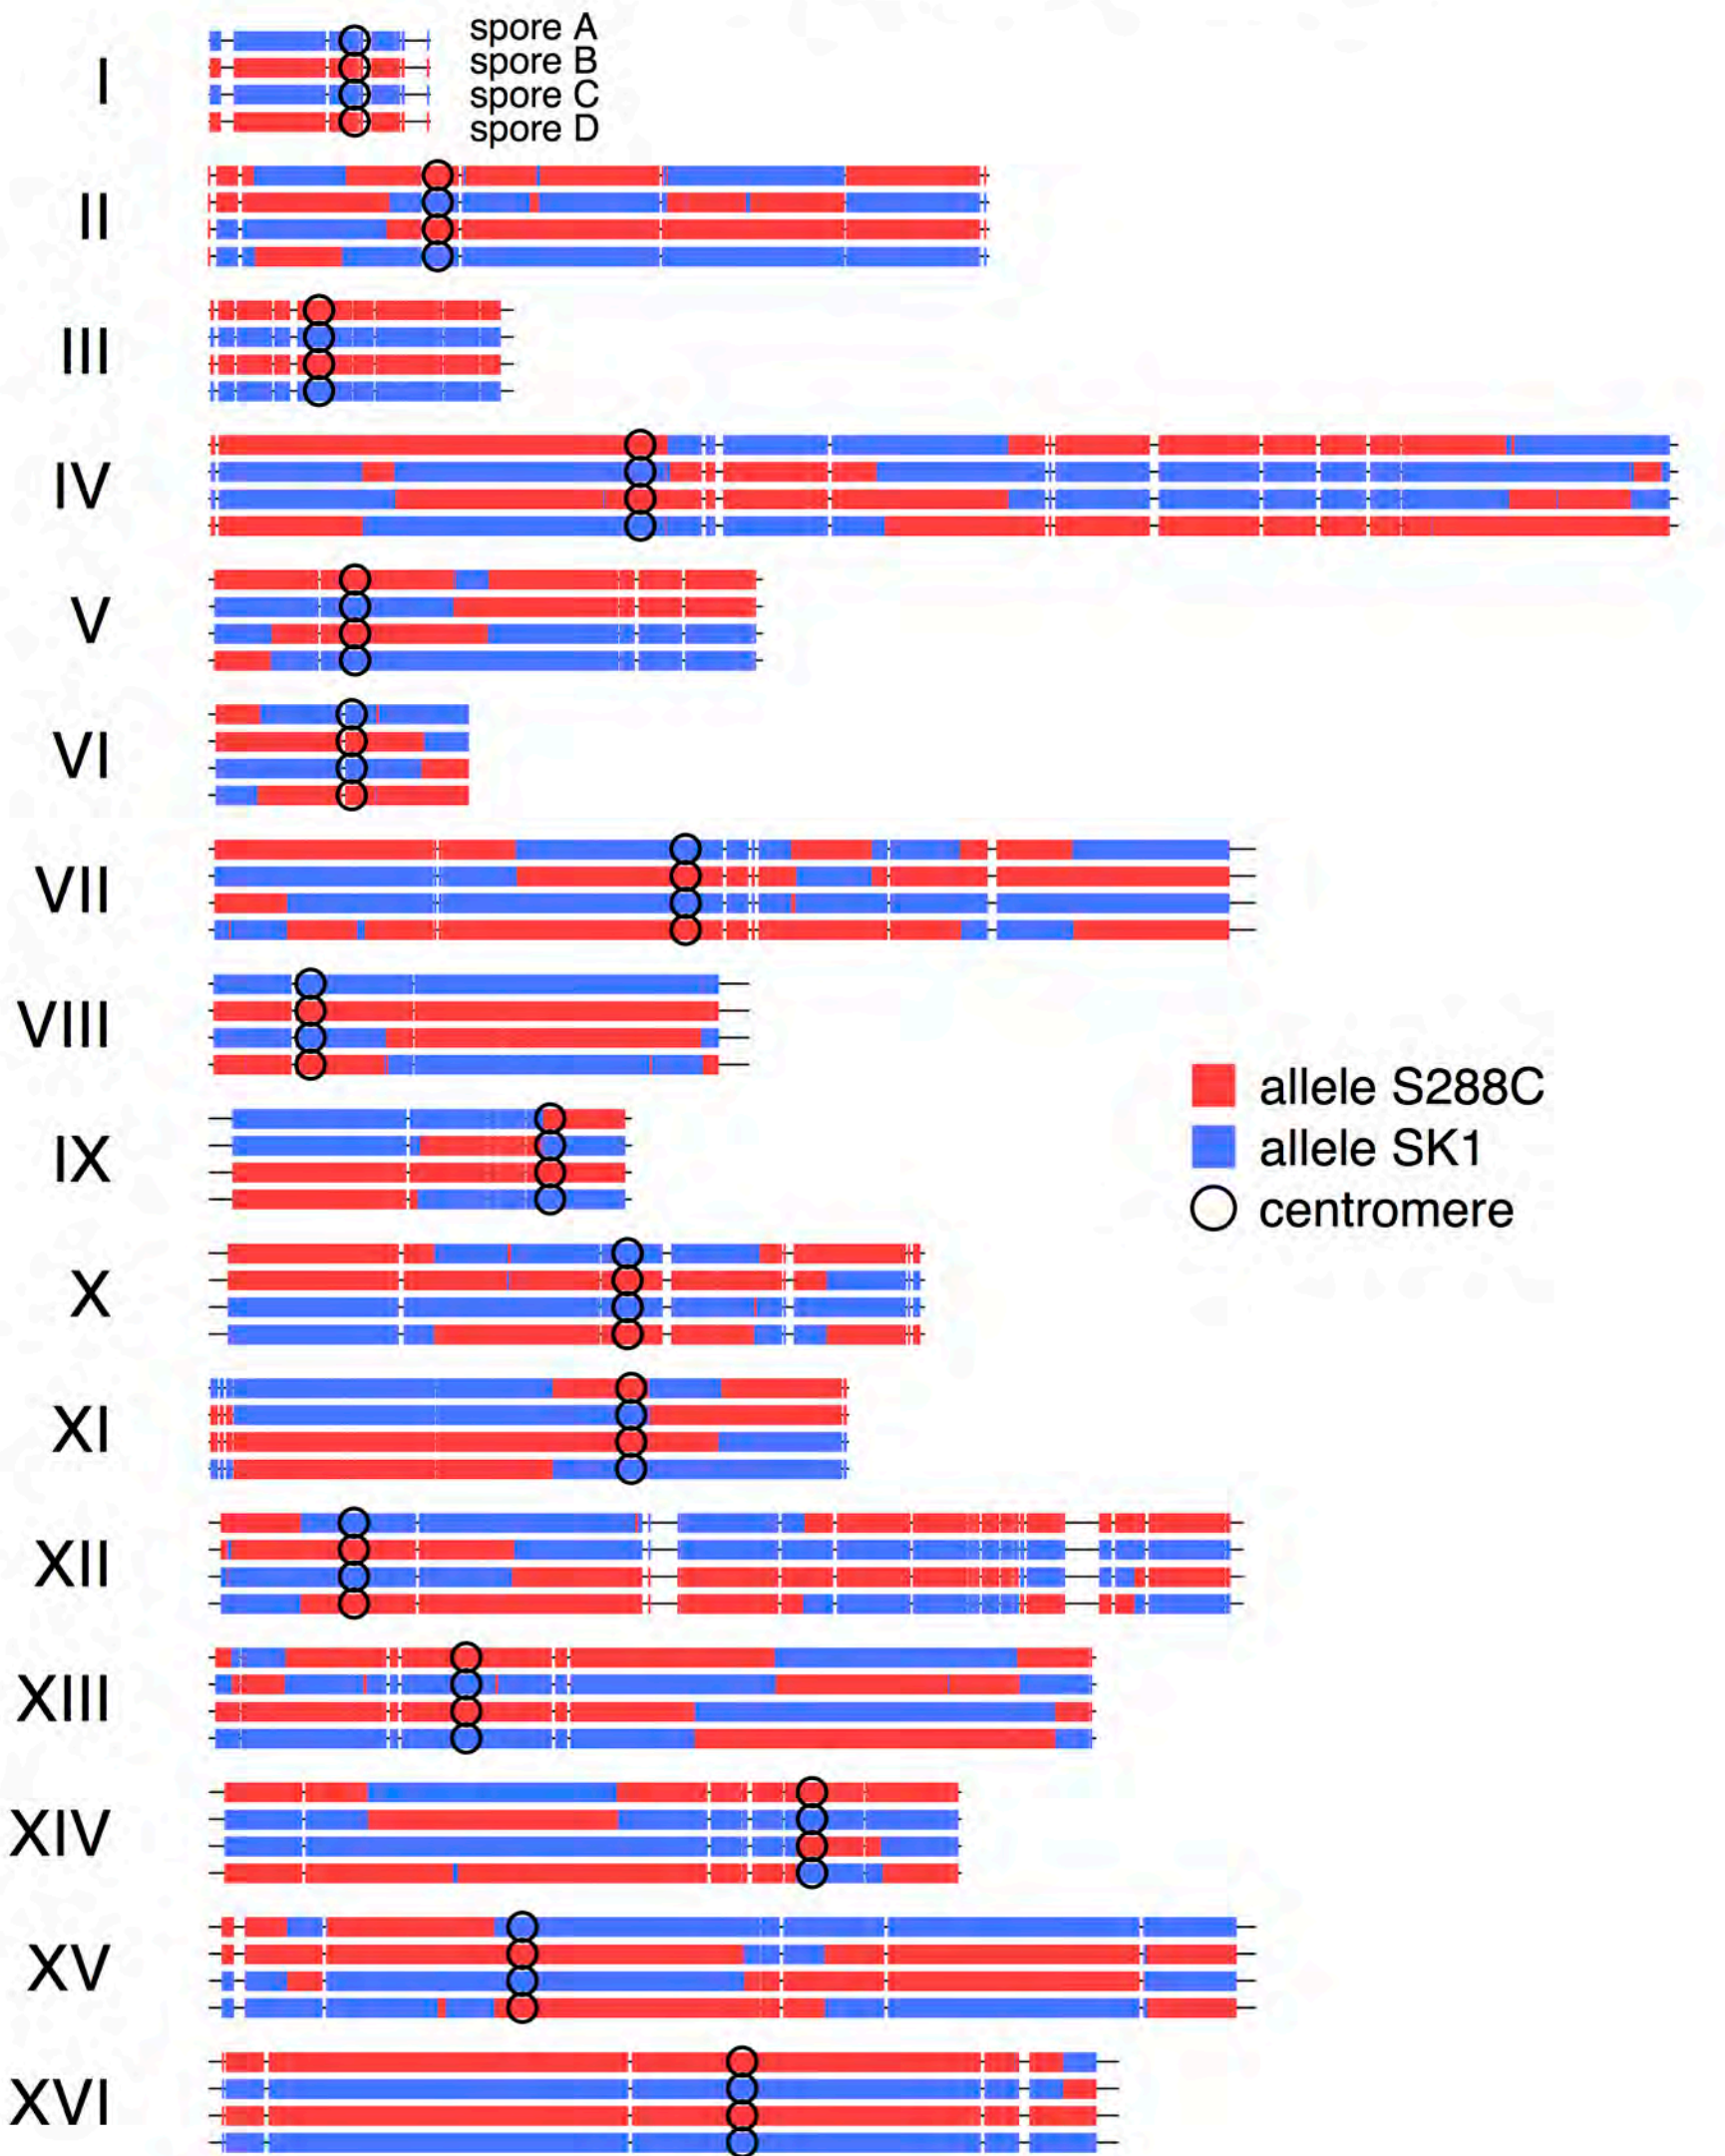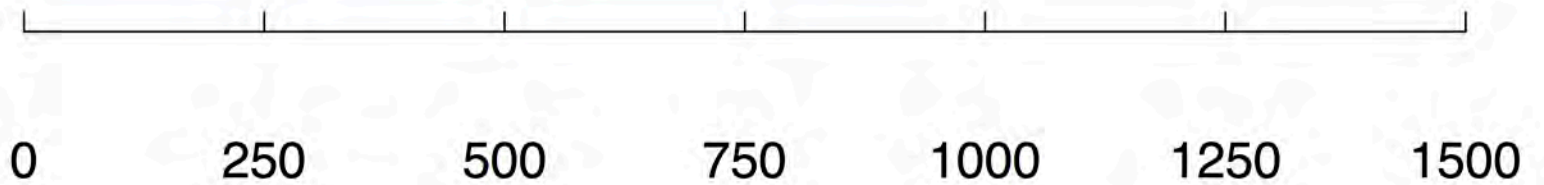

# hed1-3A\_dmc1\_tetrad\_5

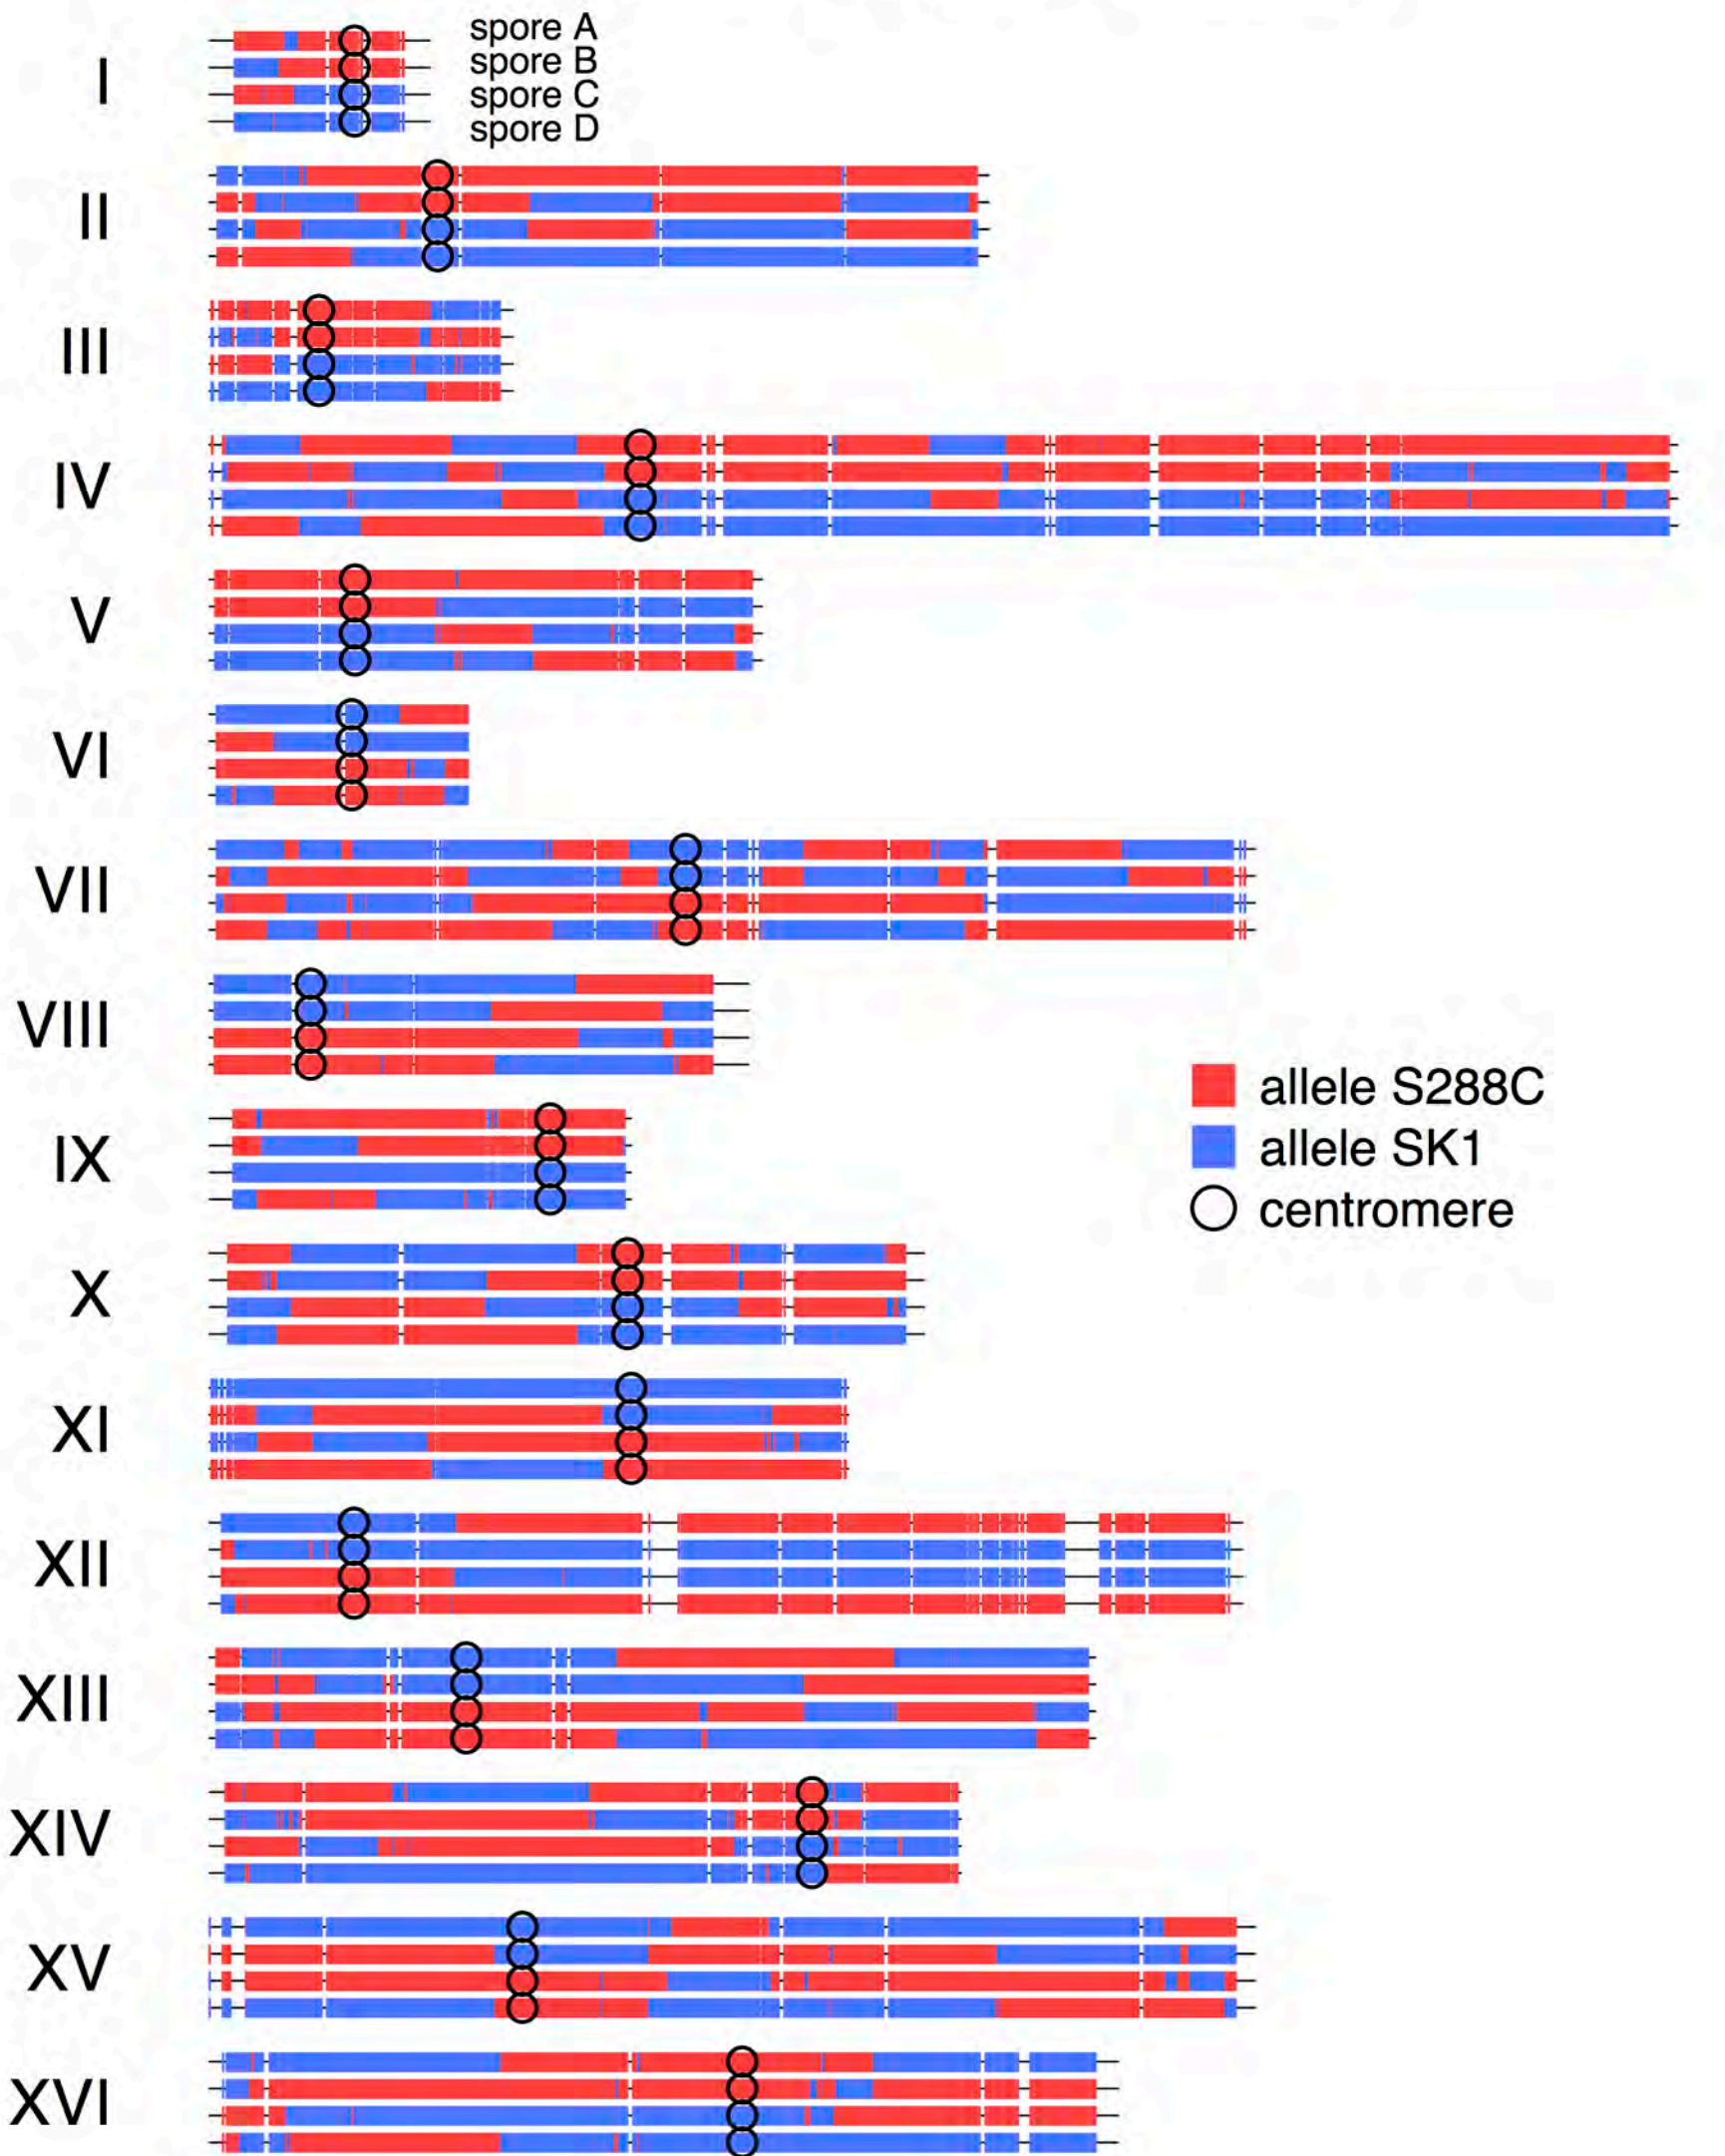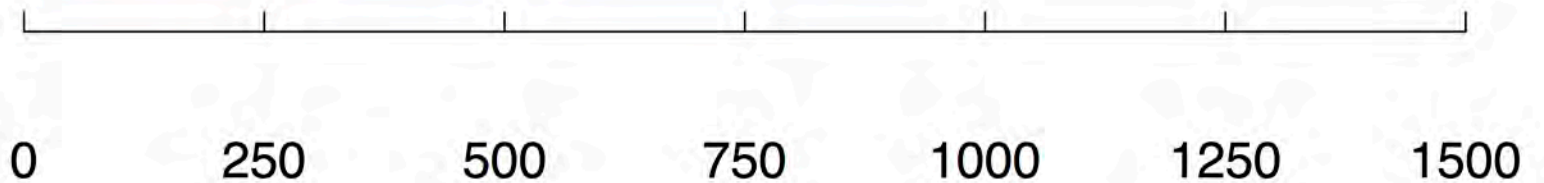

# hed1-3A\_dmc1\_tetrad\_6

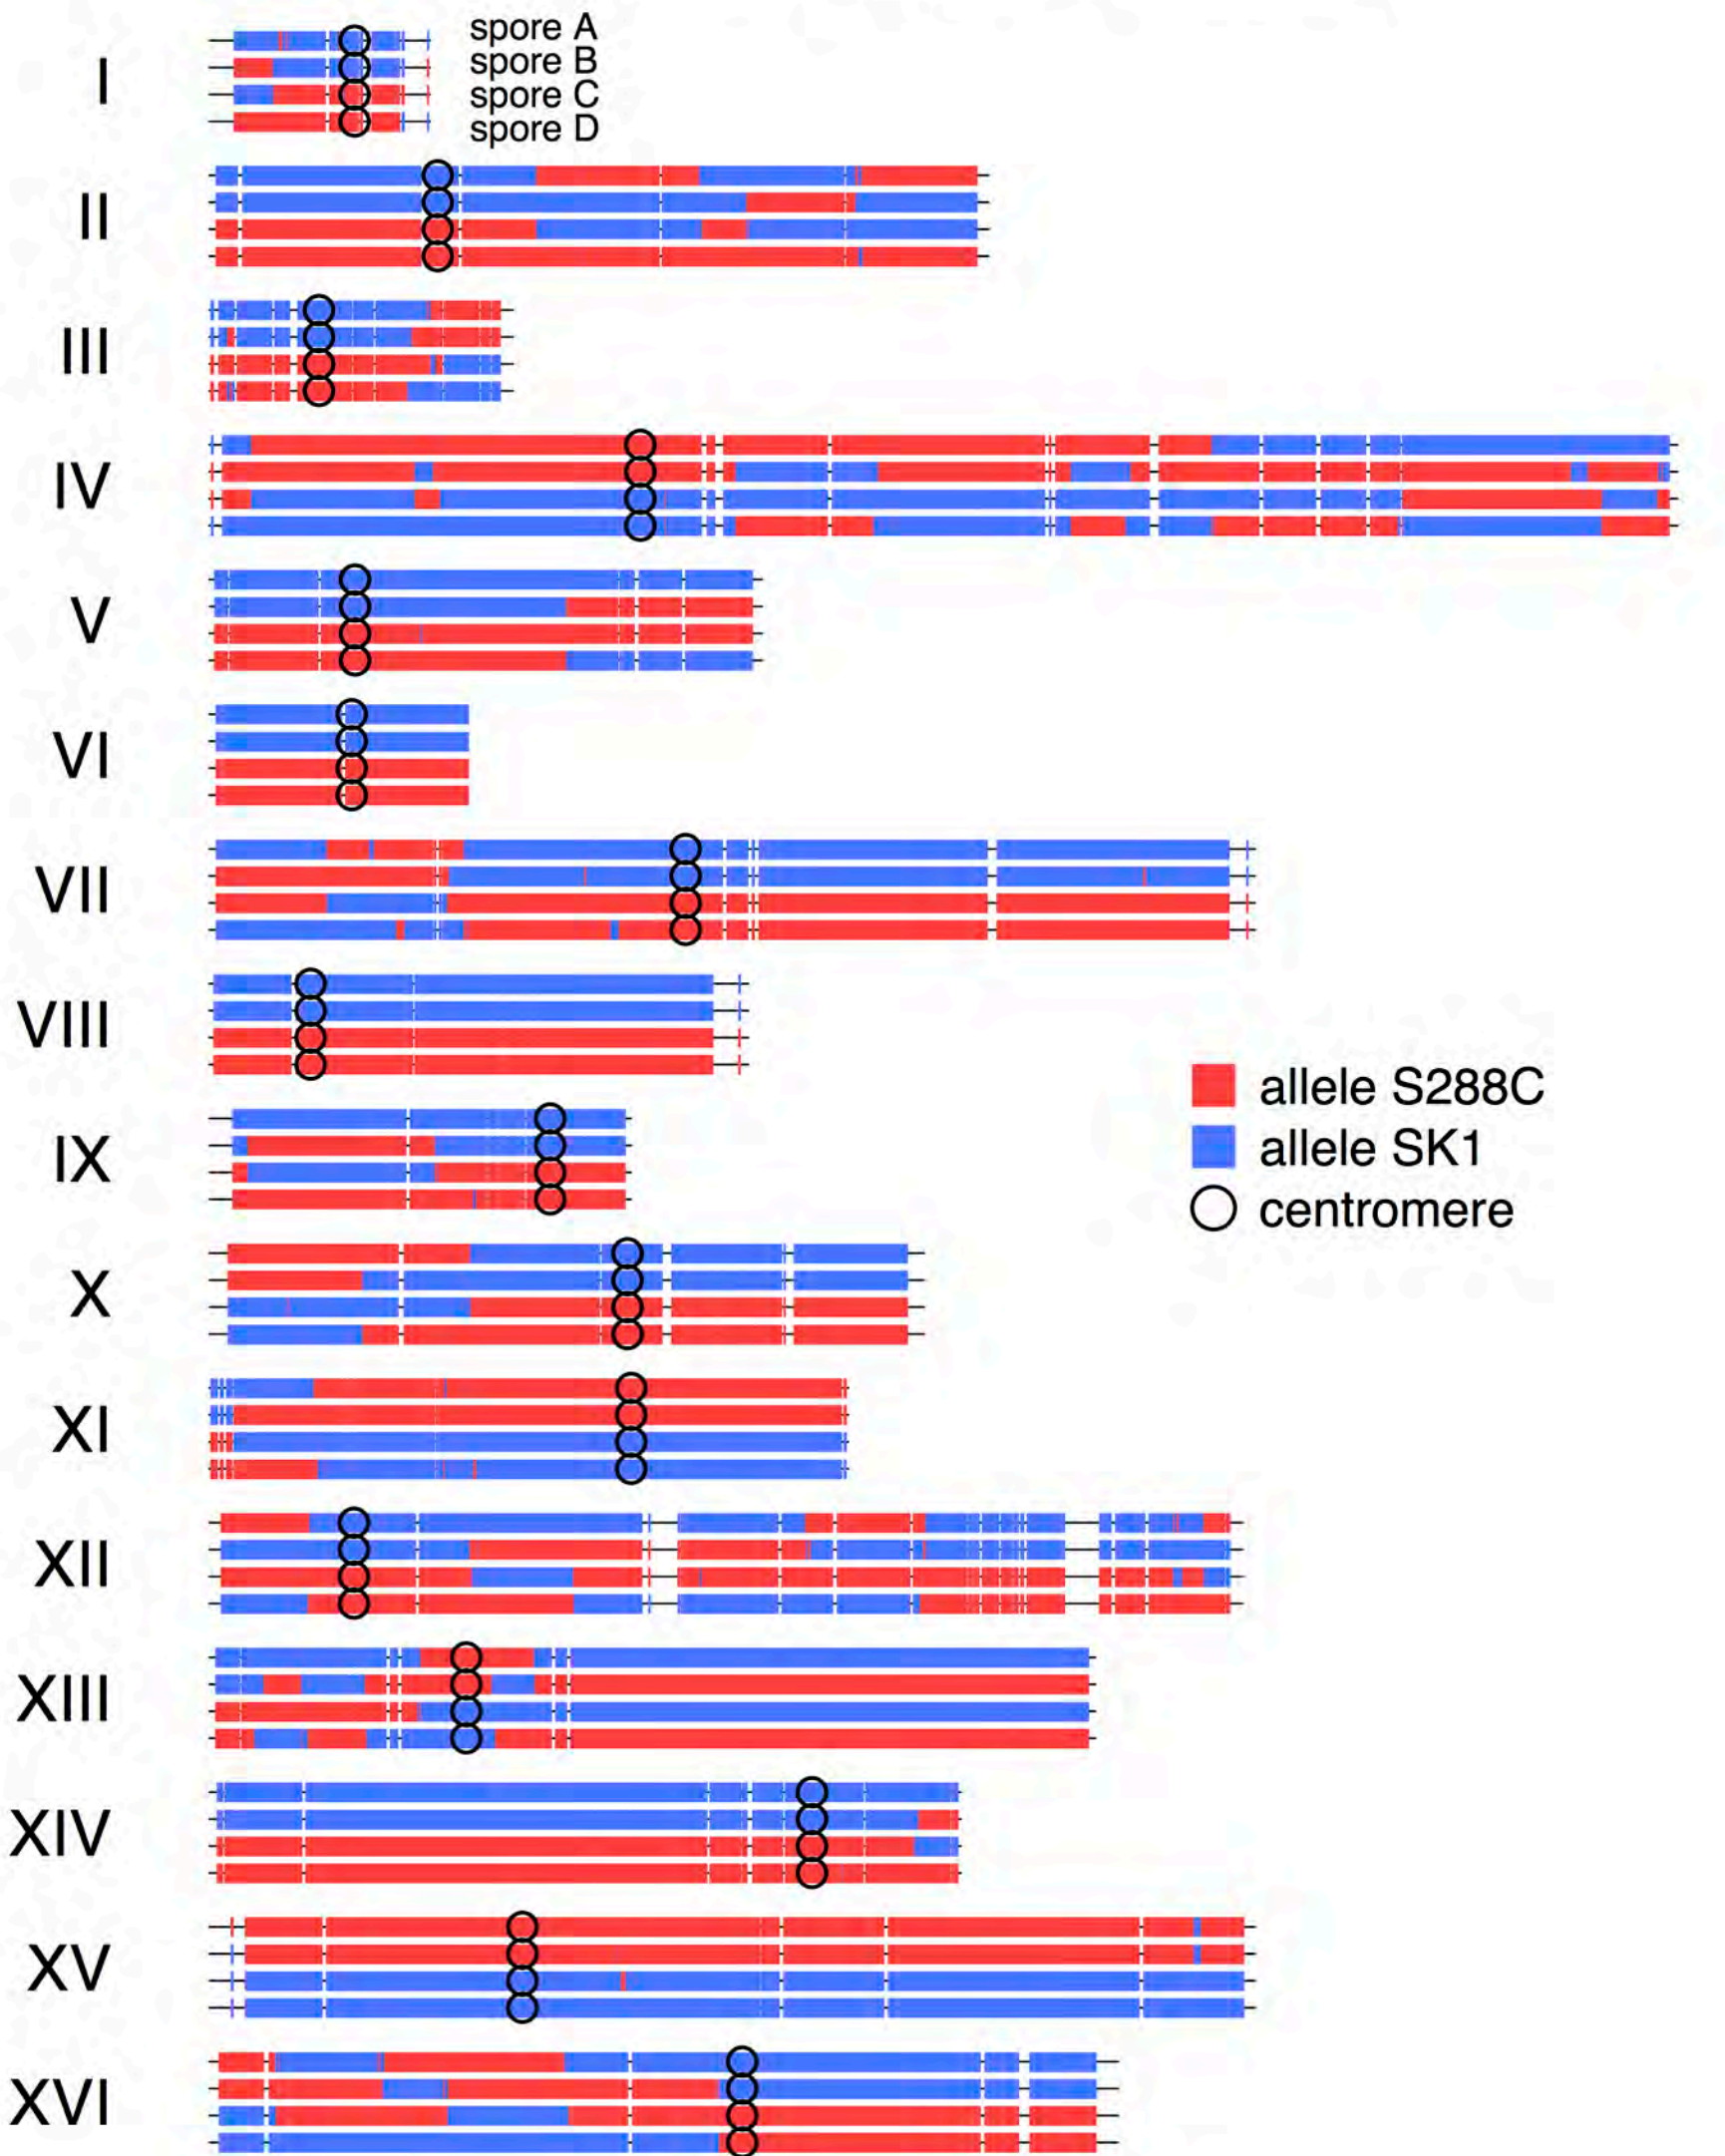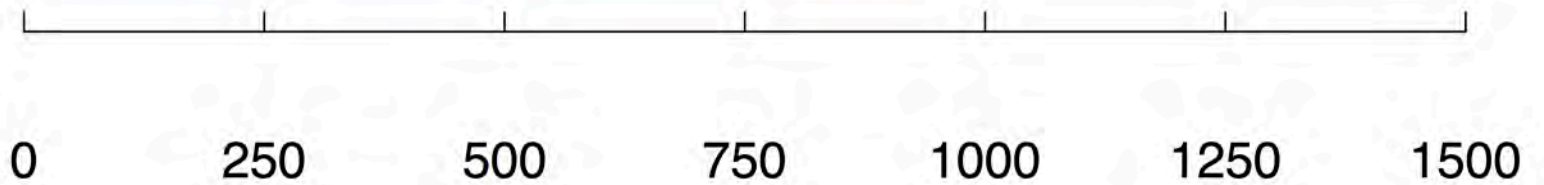

# hed1-3A\_dmc1\_tetrad\_7

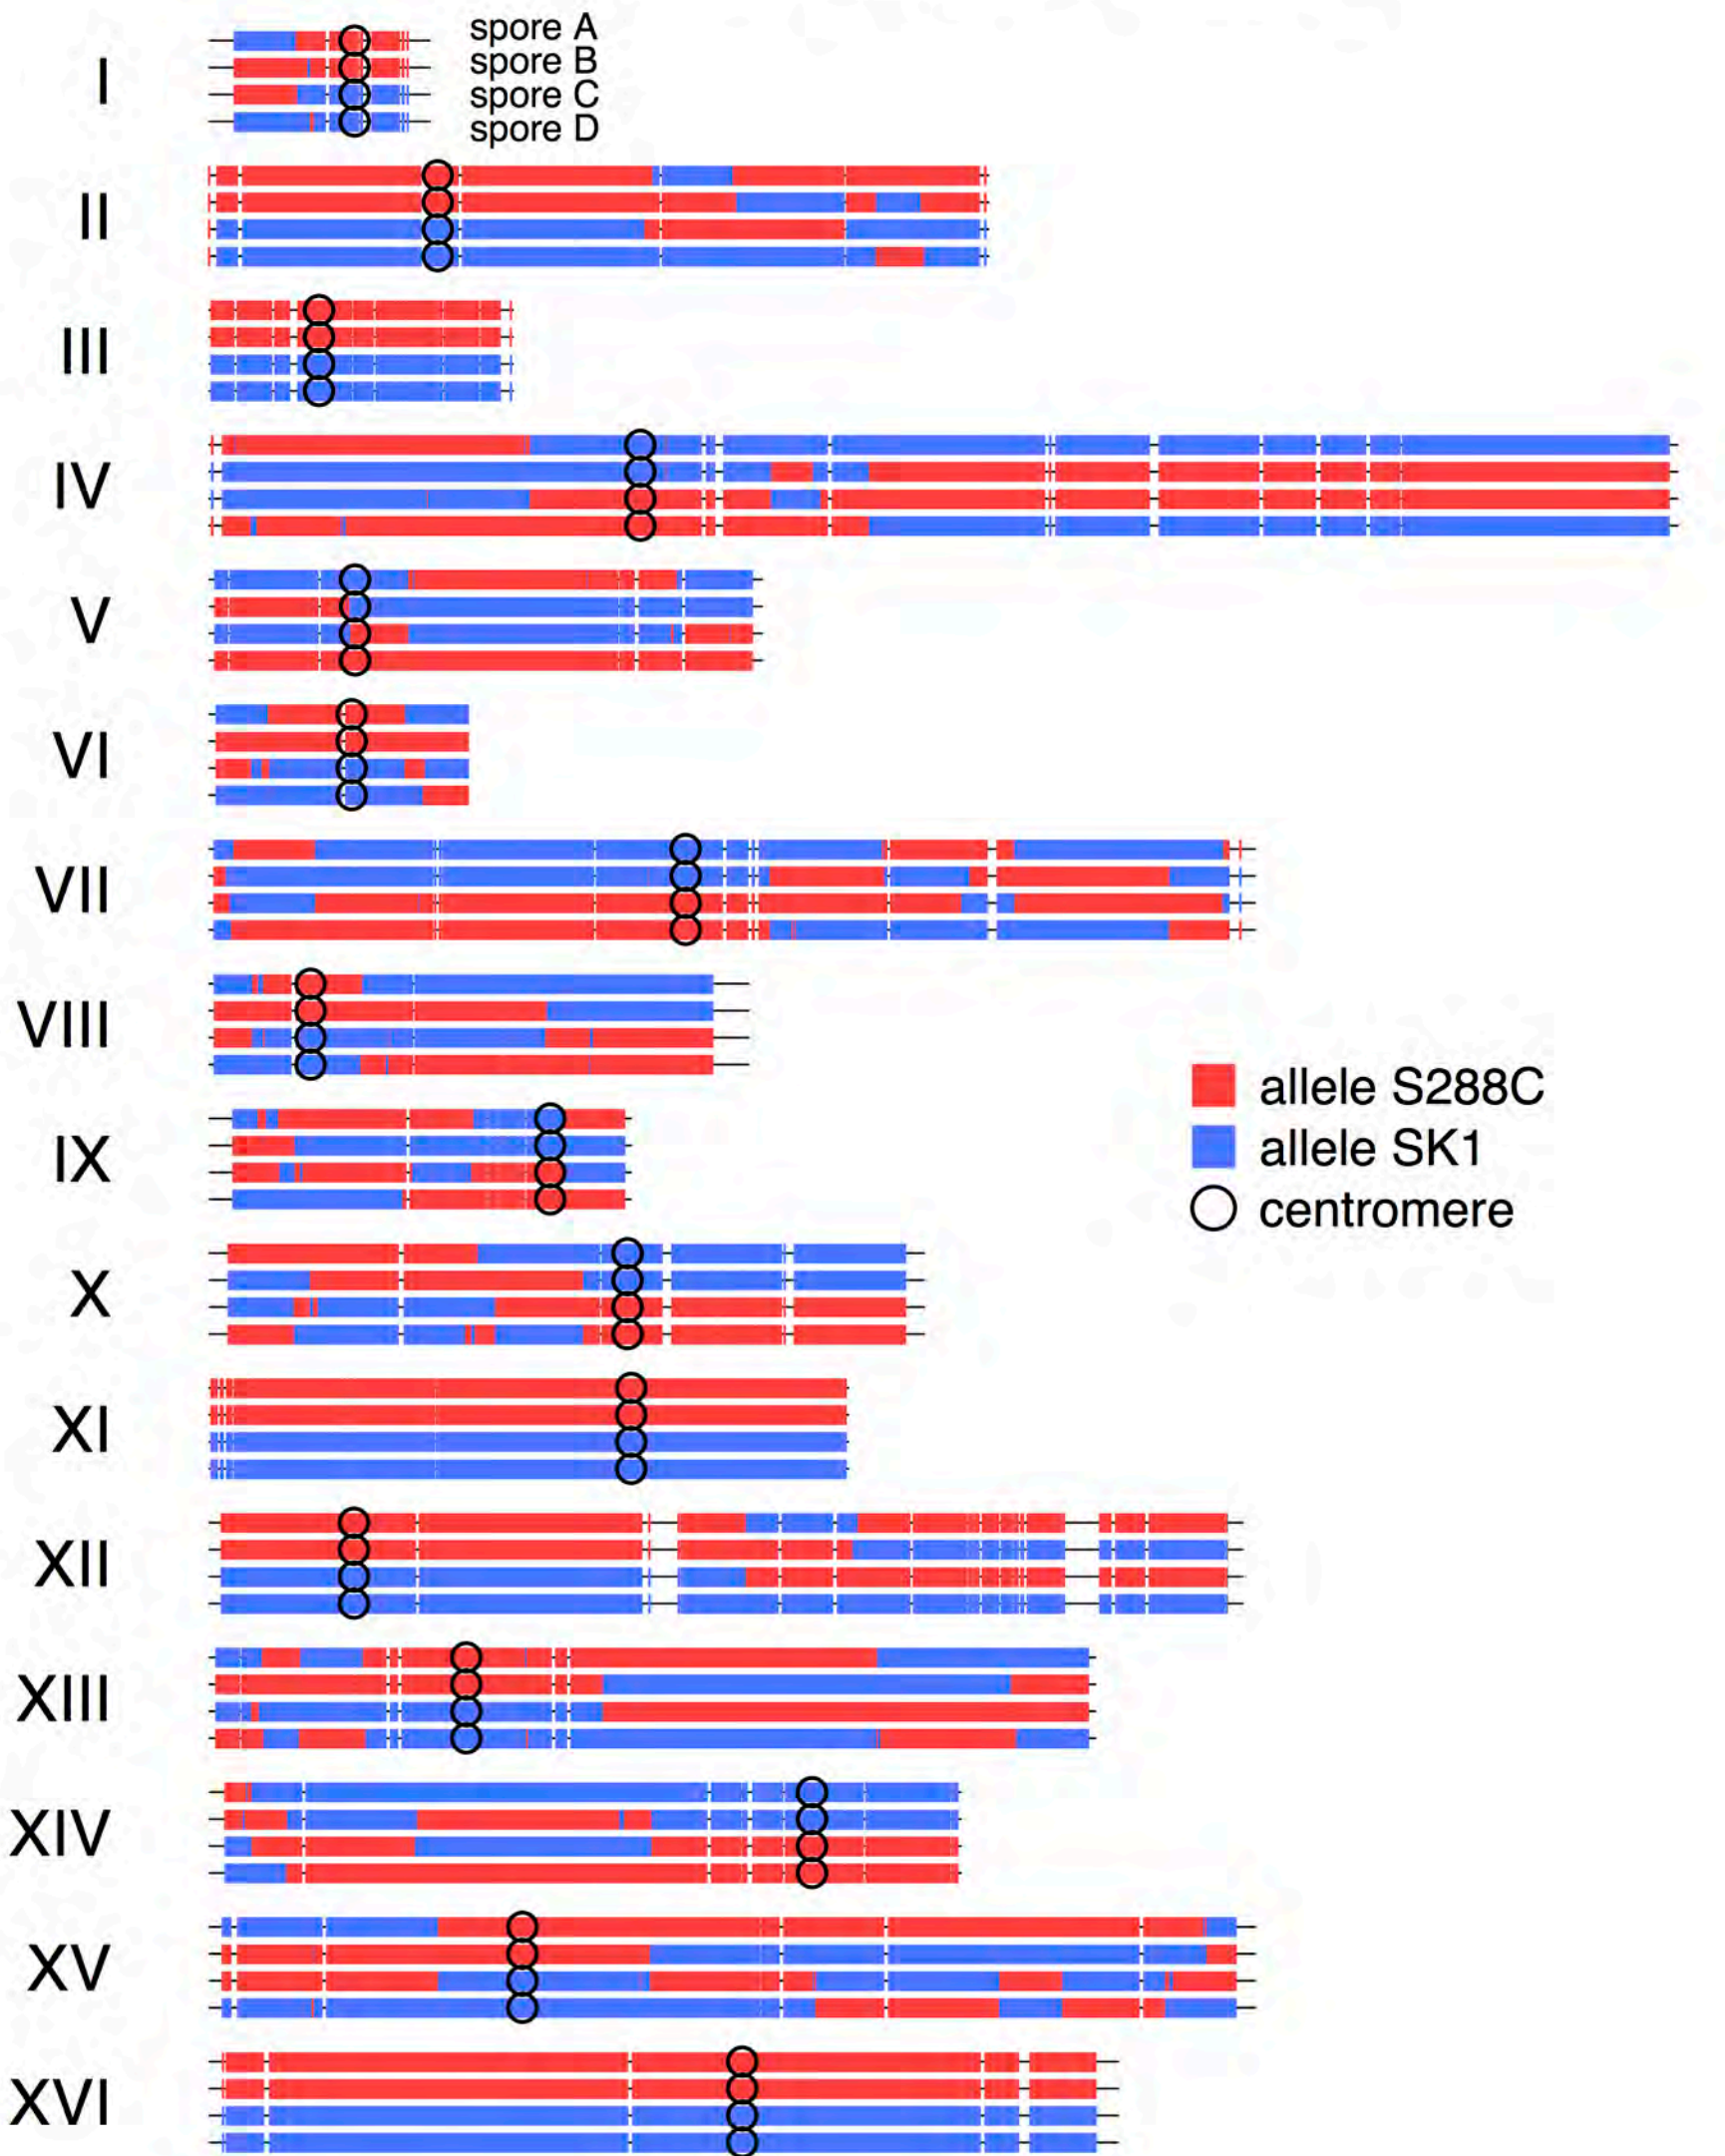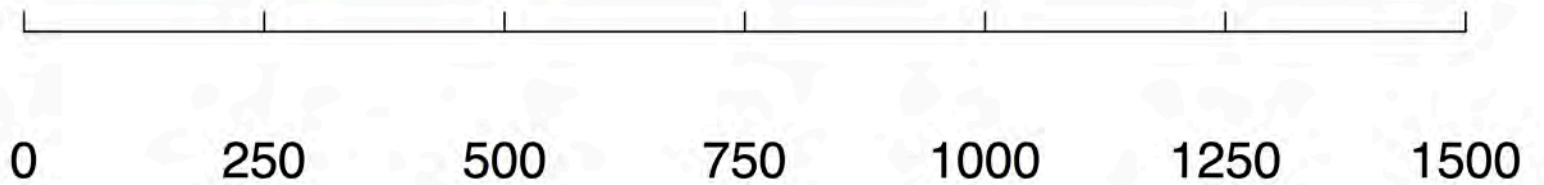

# hed1-3A\_dmc1\_tetrad\_8

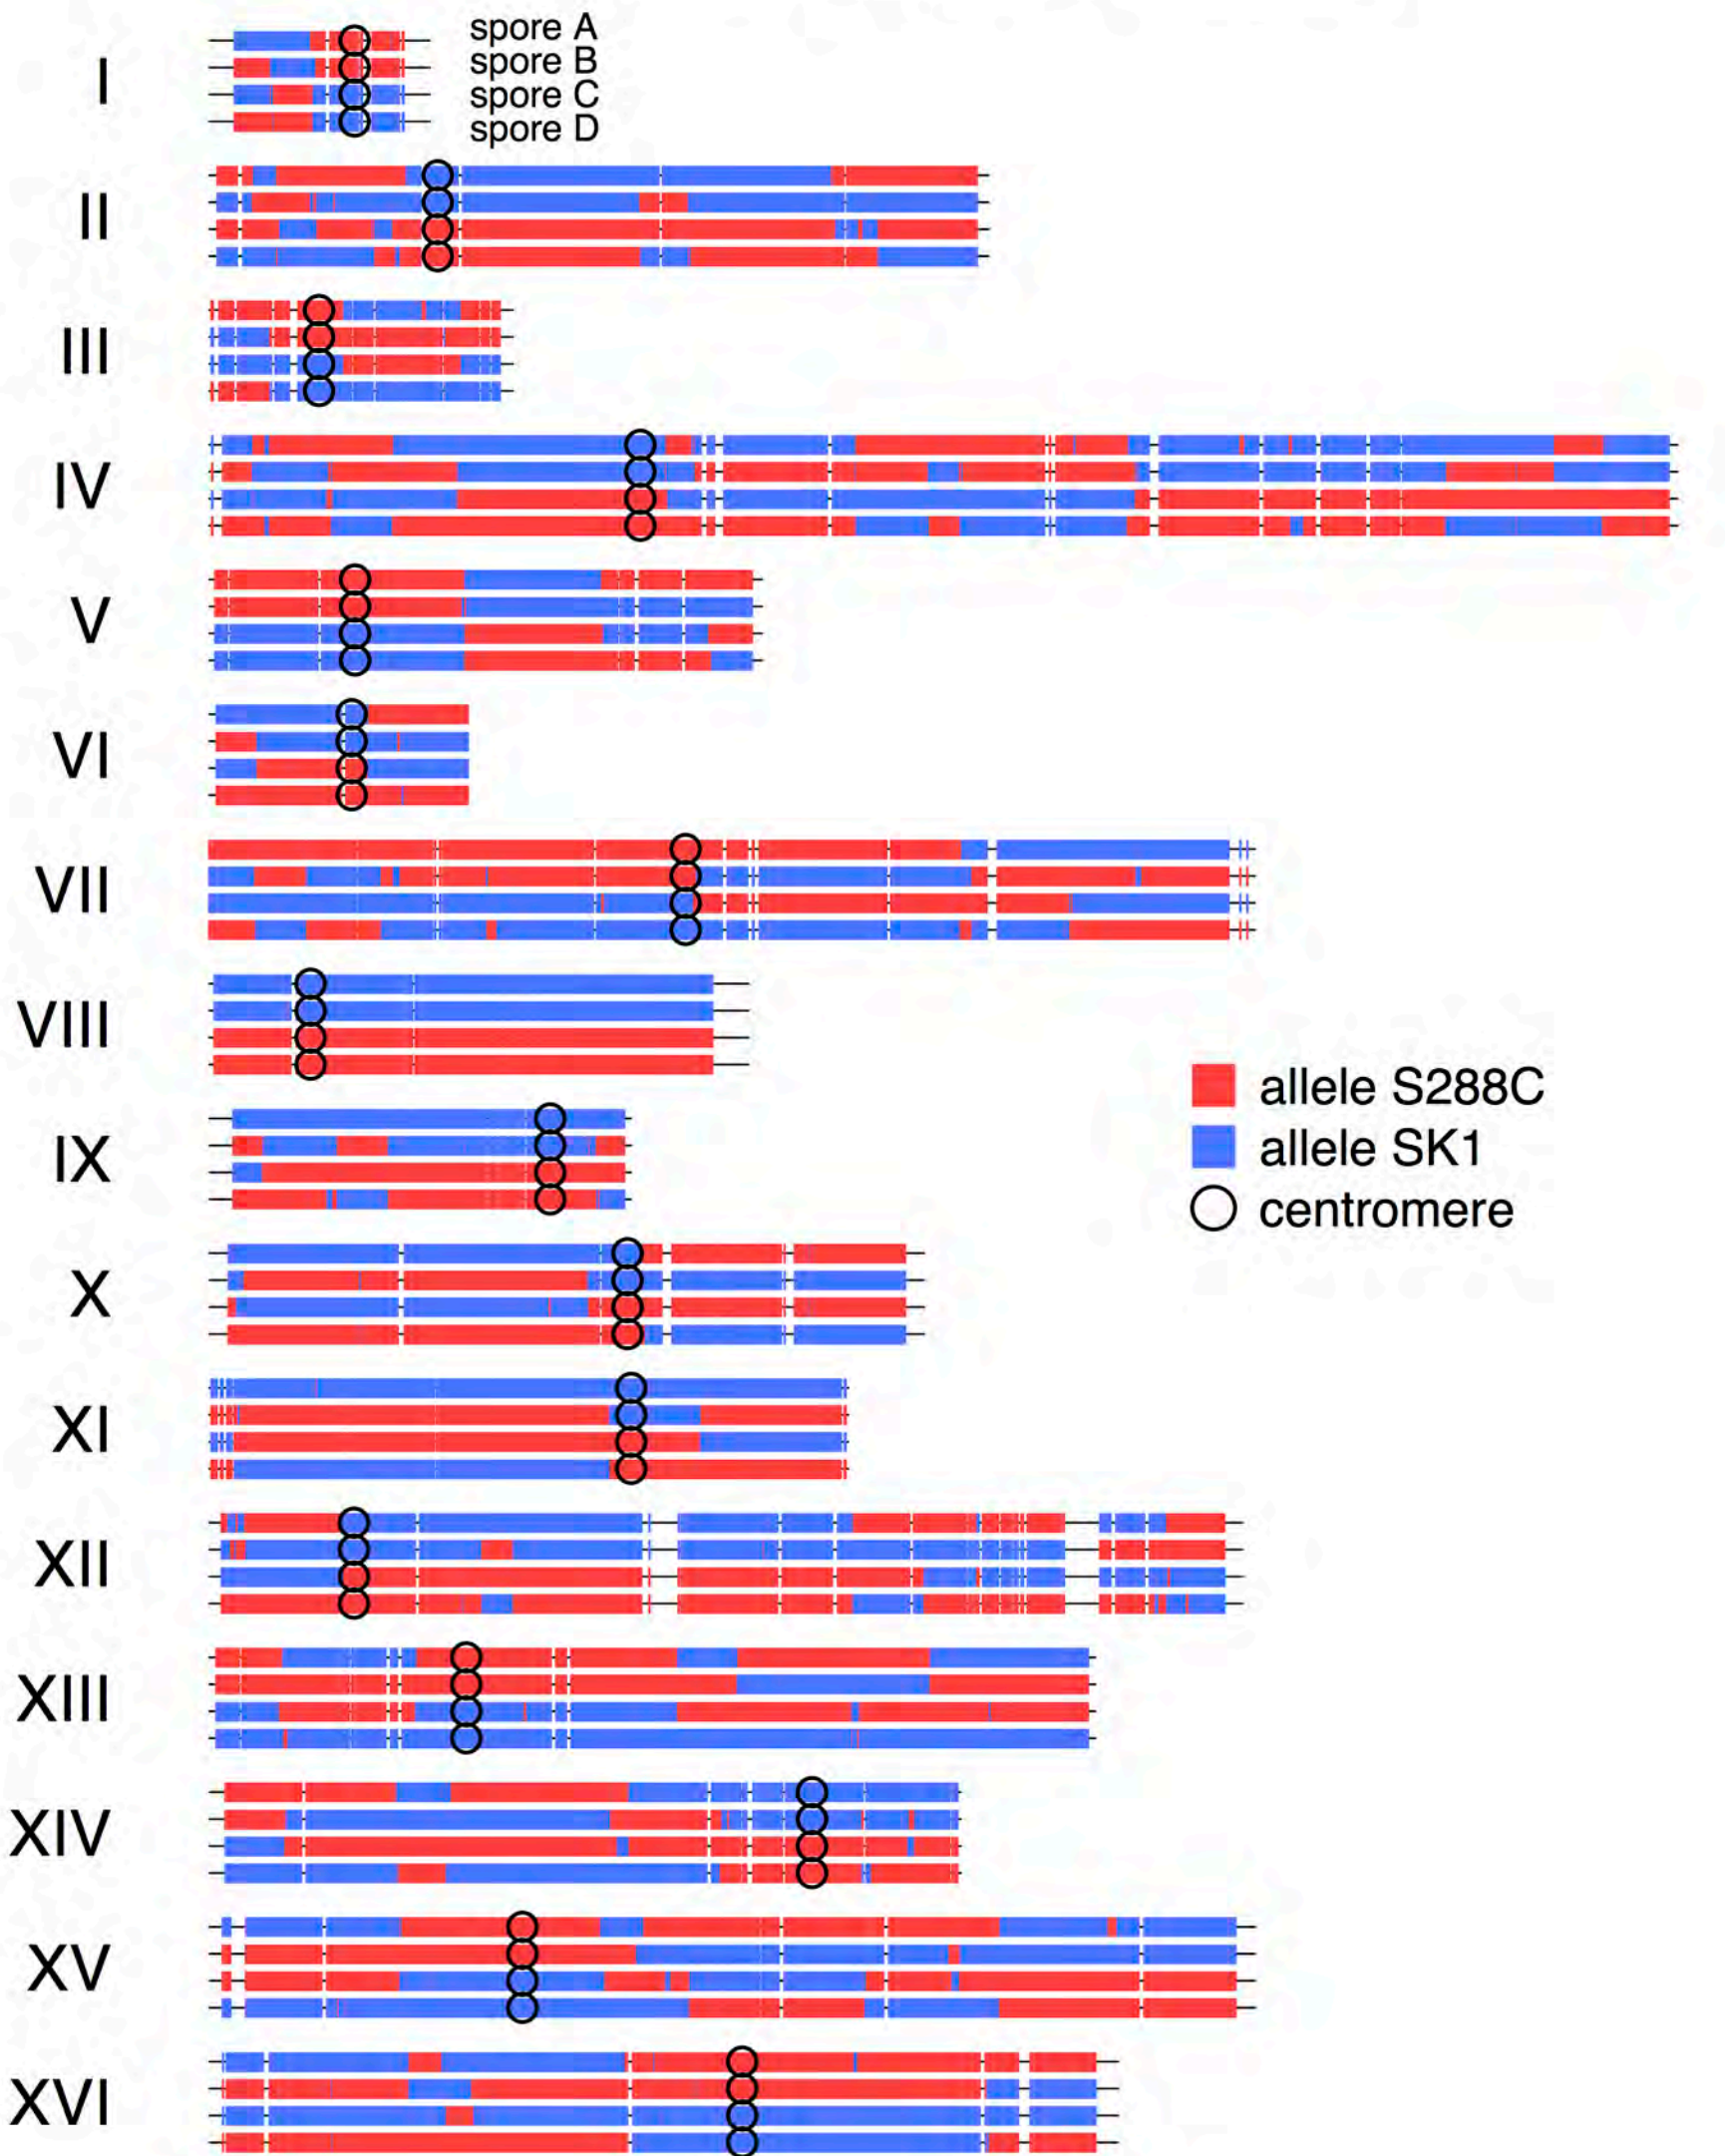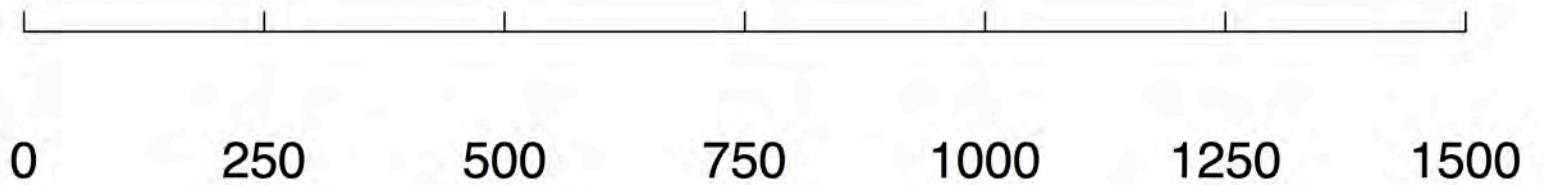



# hed1-3A\_dmc1\_tetrad\_9

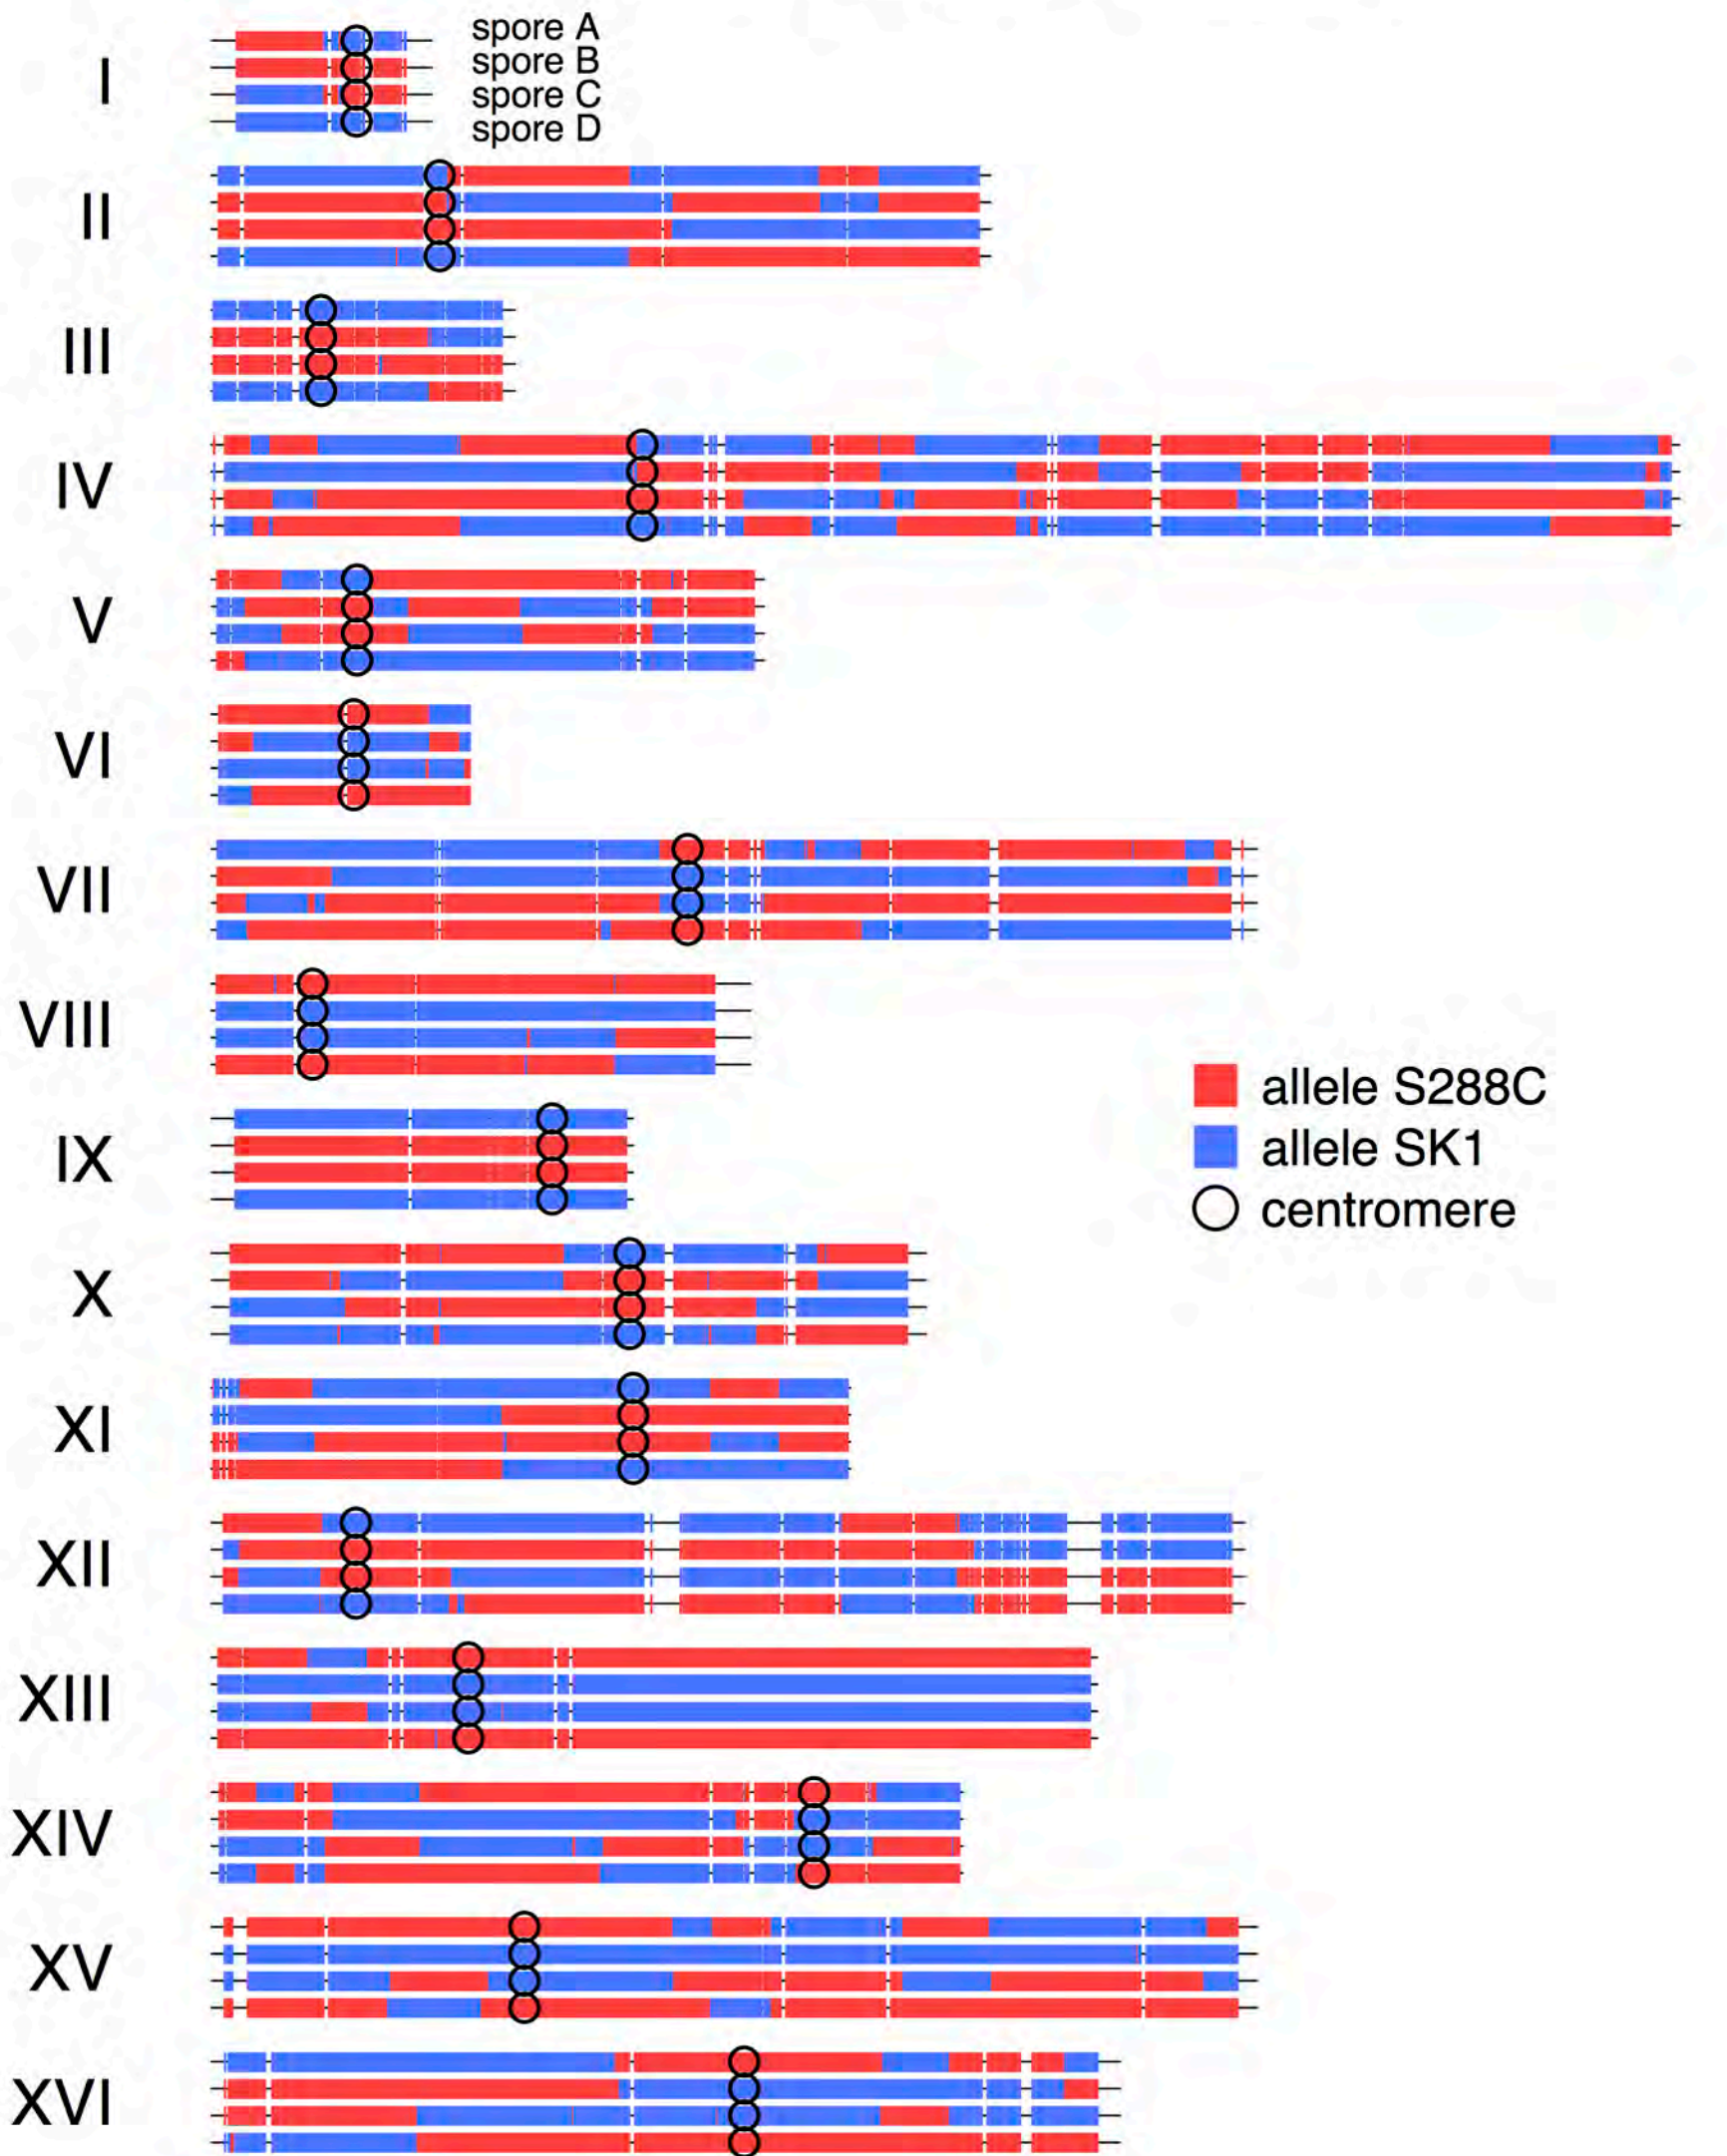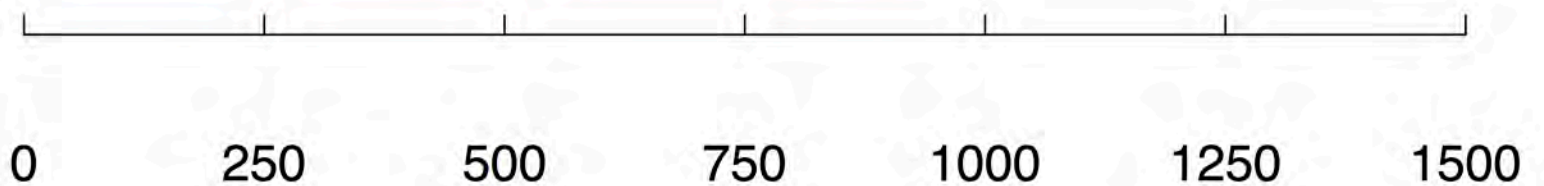

# hed1-3A\_dmc1\_tetrad\_10

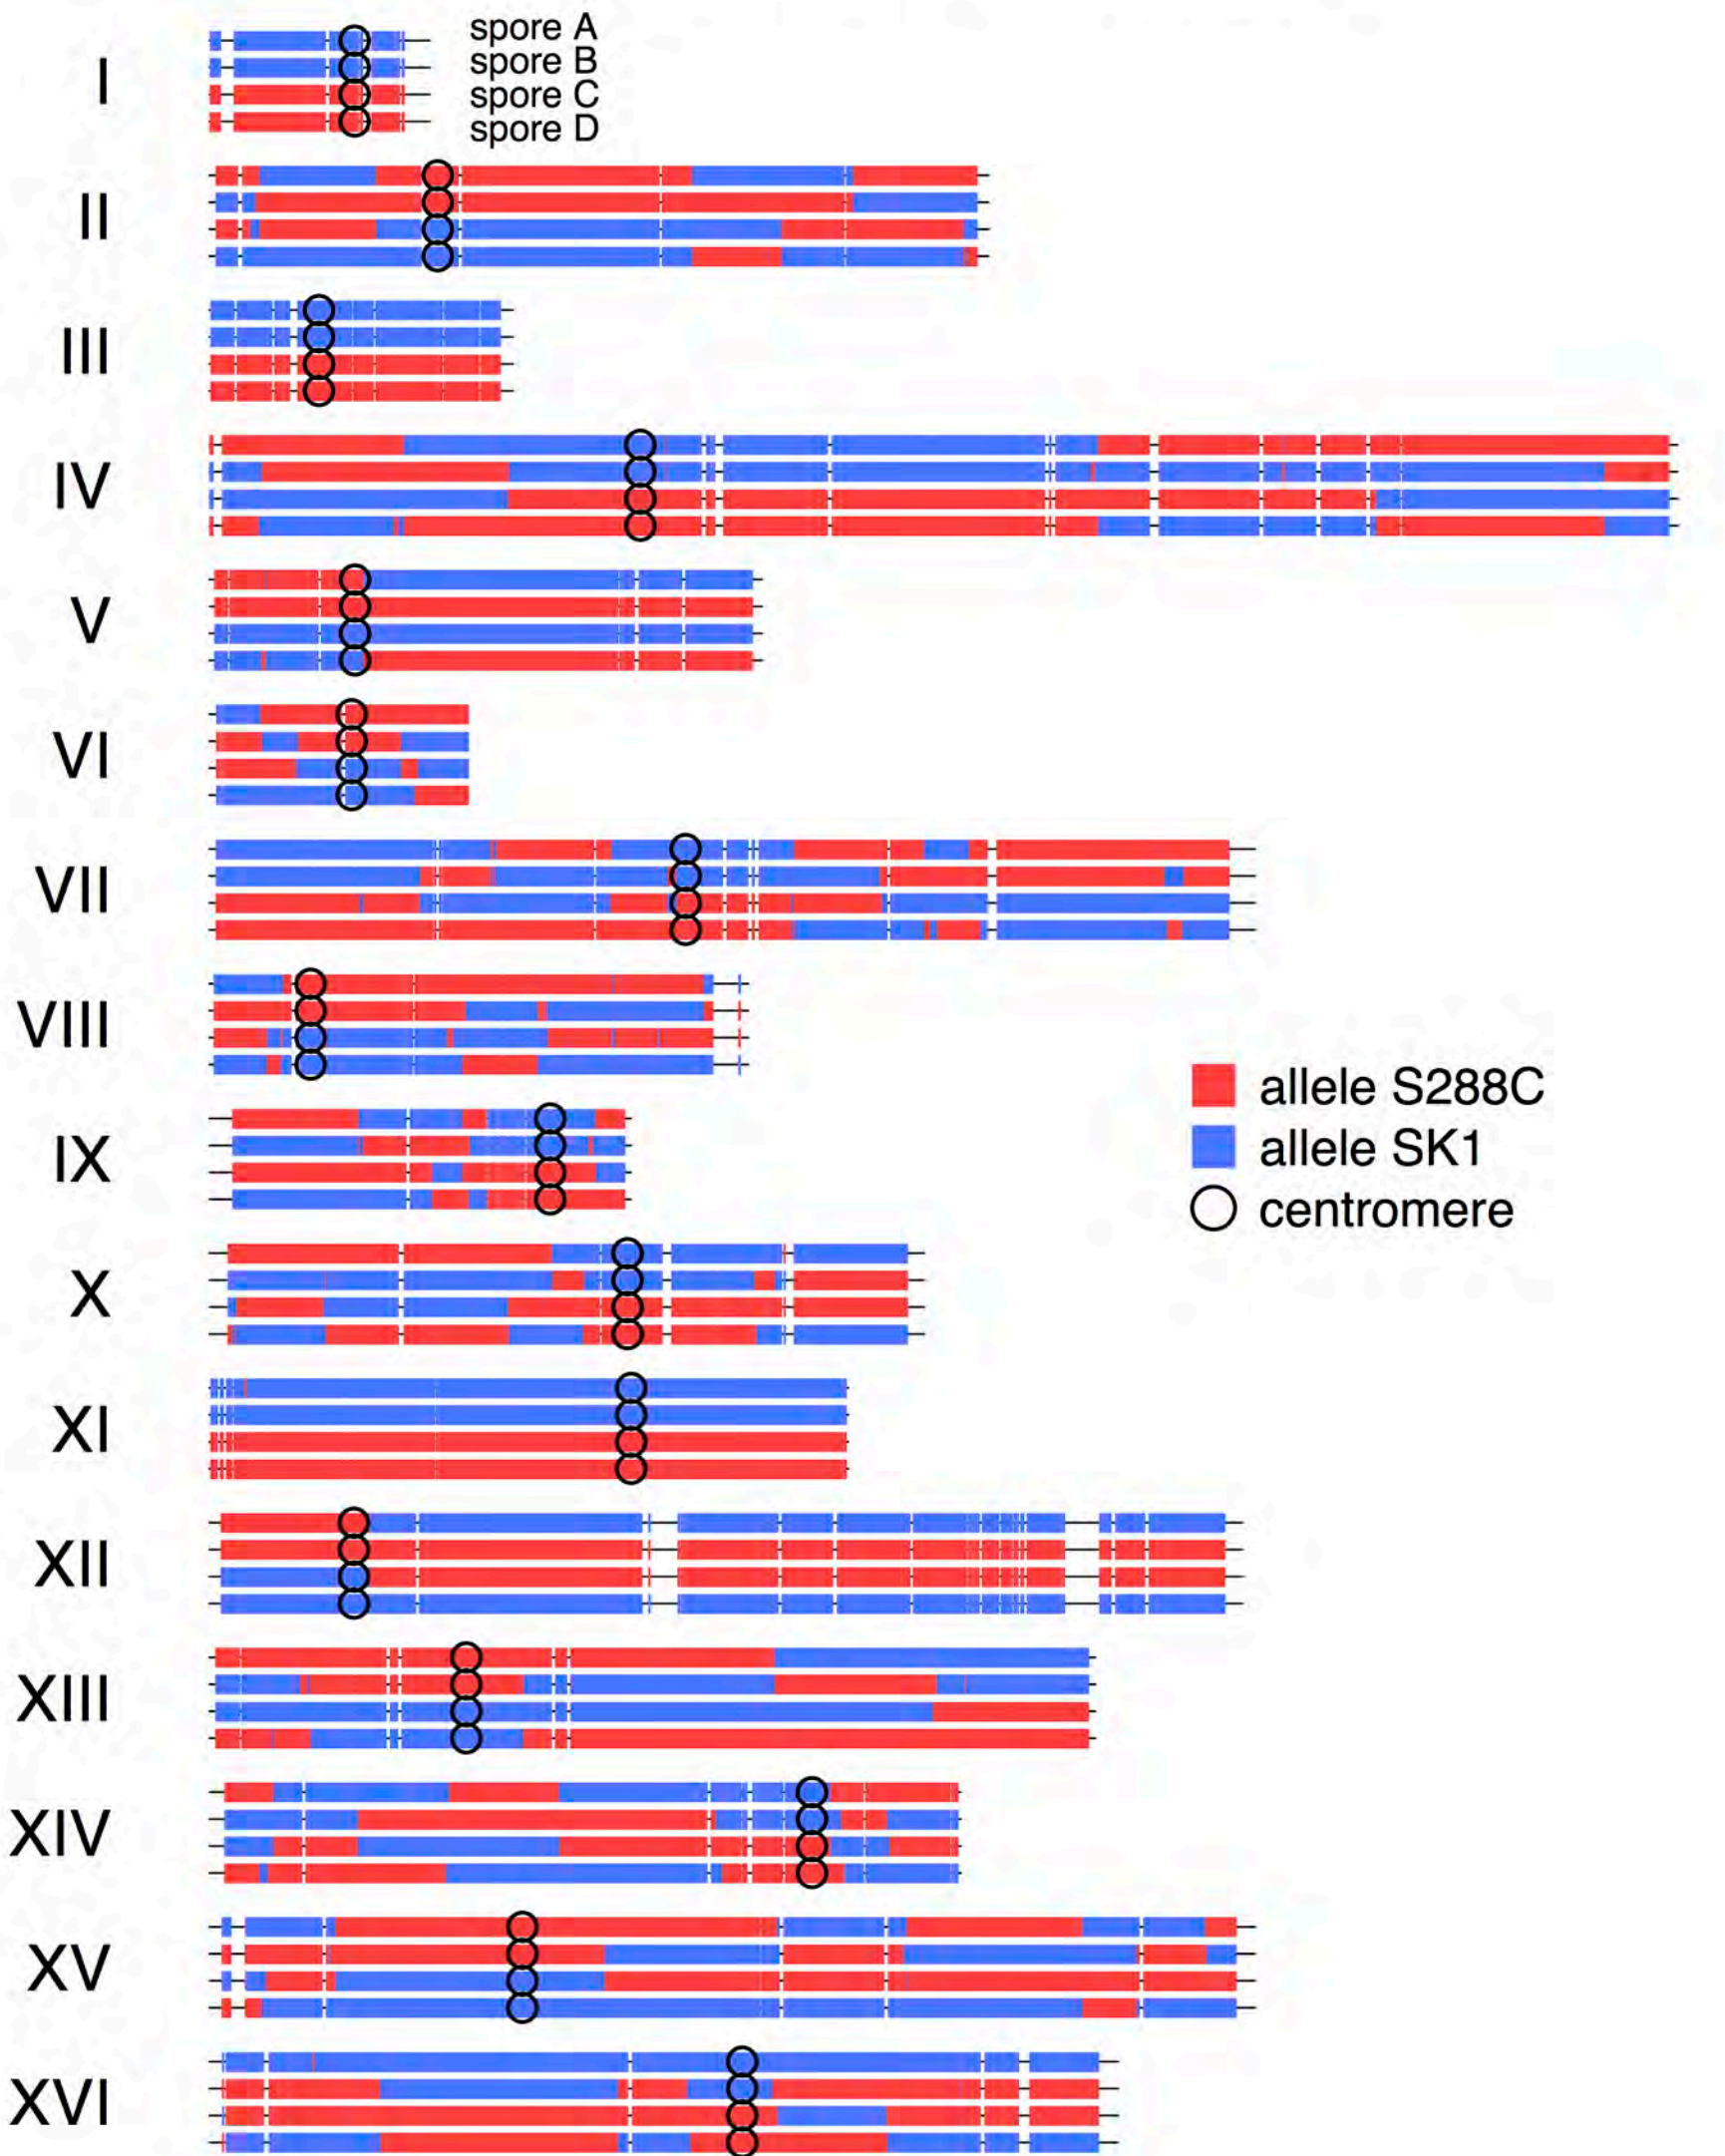

# hed1-3A\_dmc1\_tetrad\_11

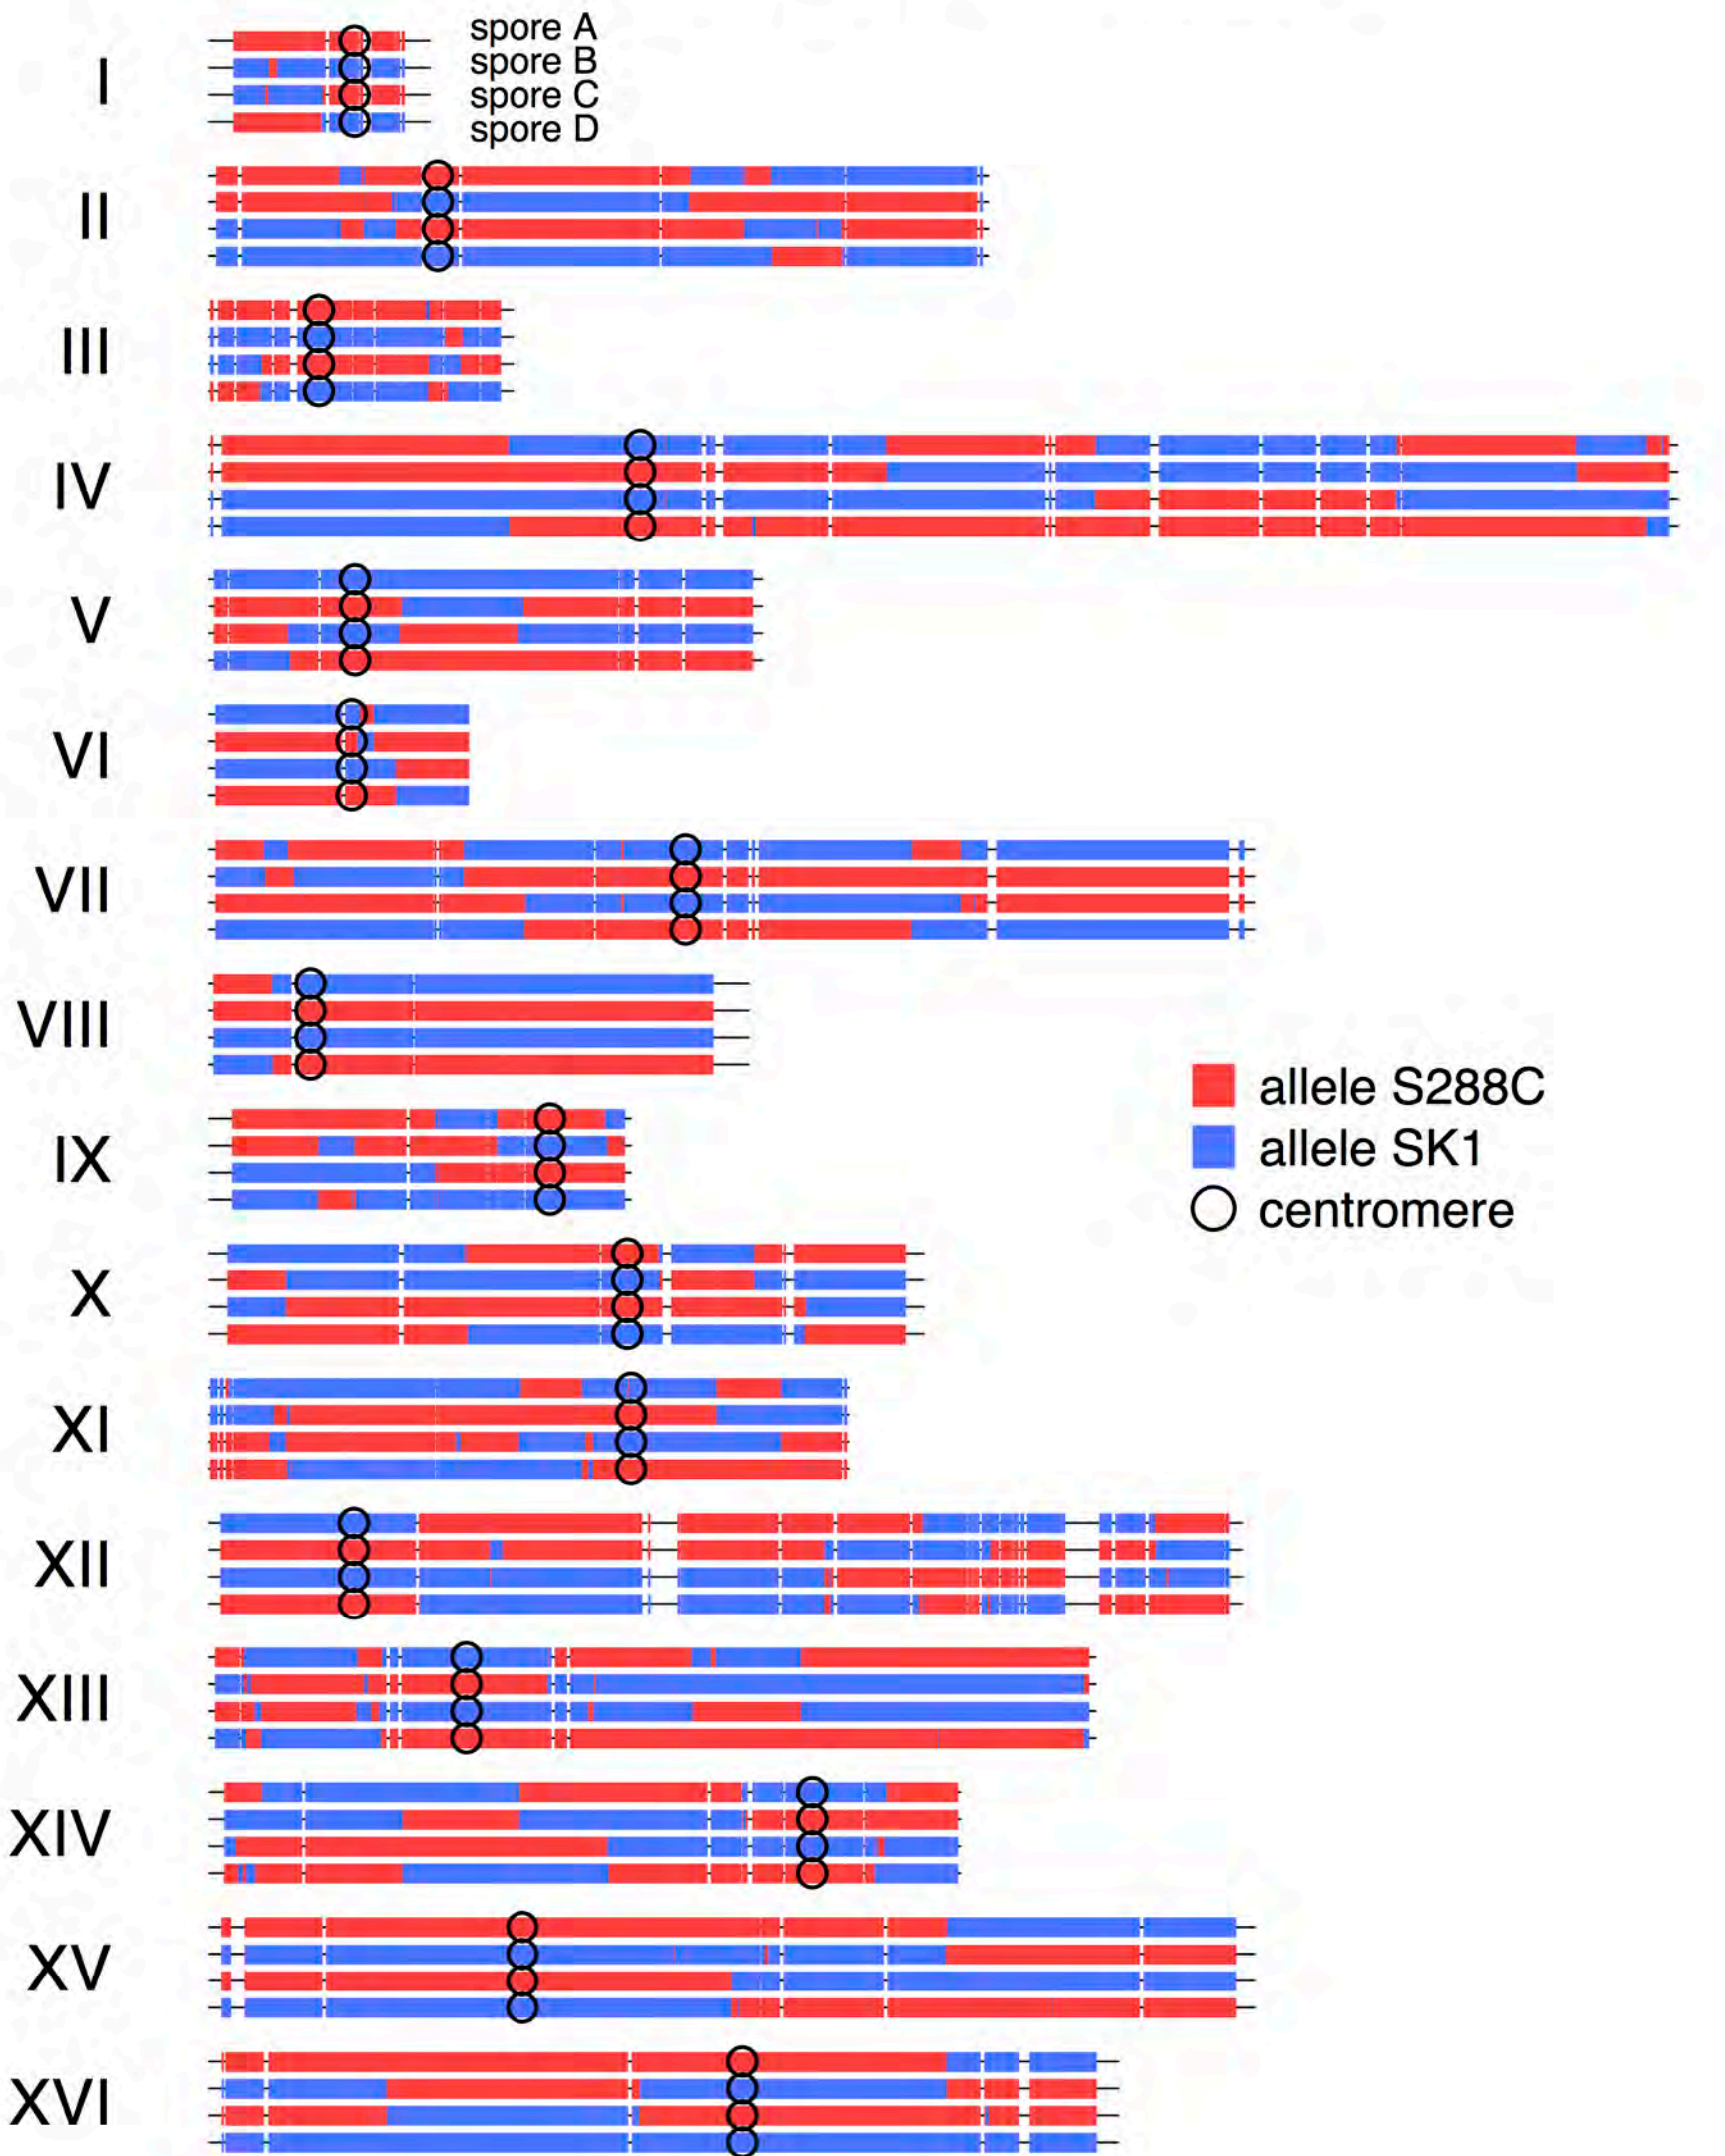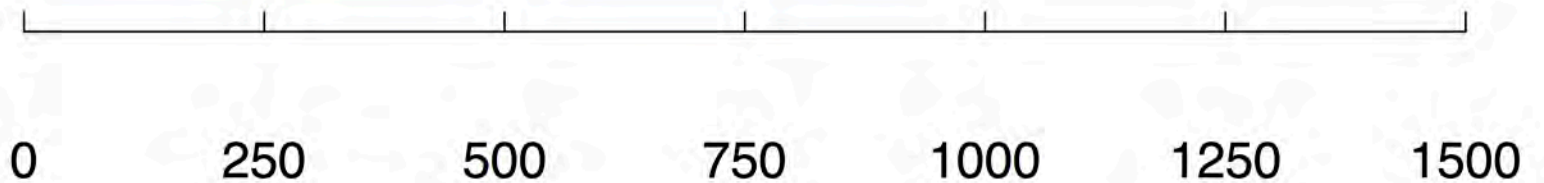

# hed1-3A\_dmc1\_tetrad\_12

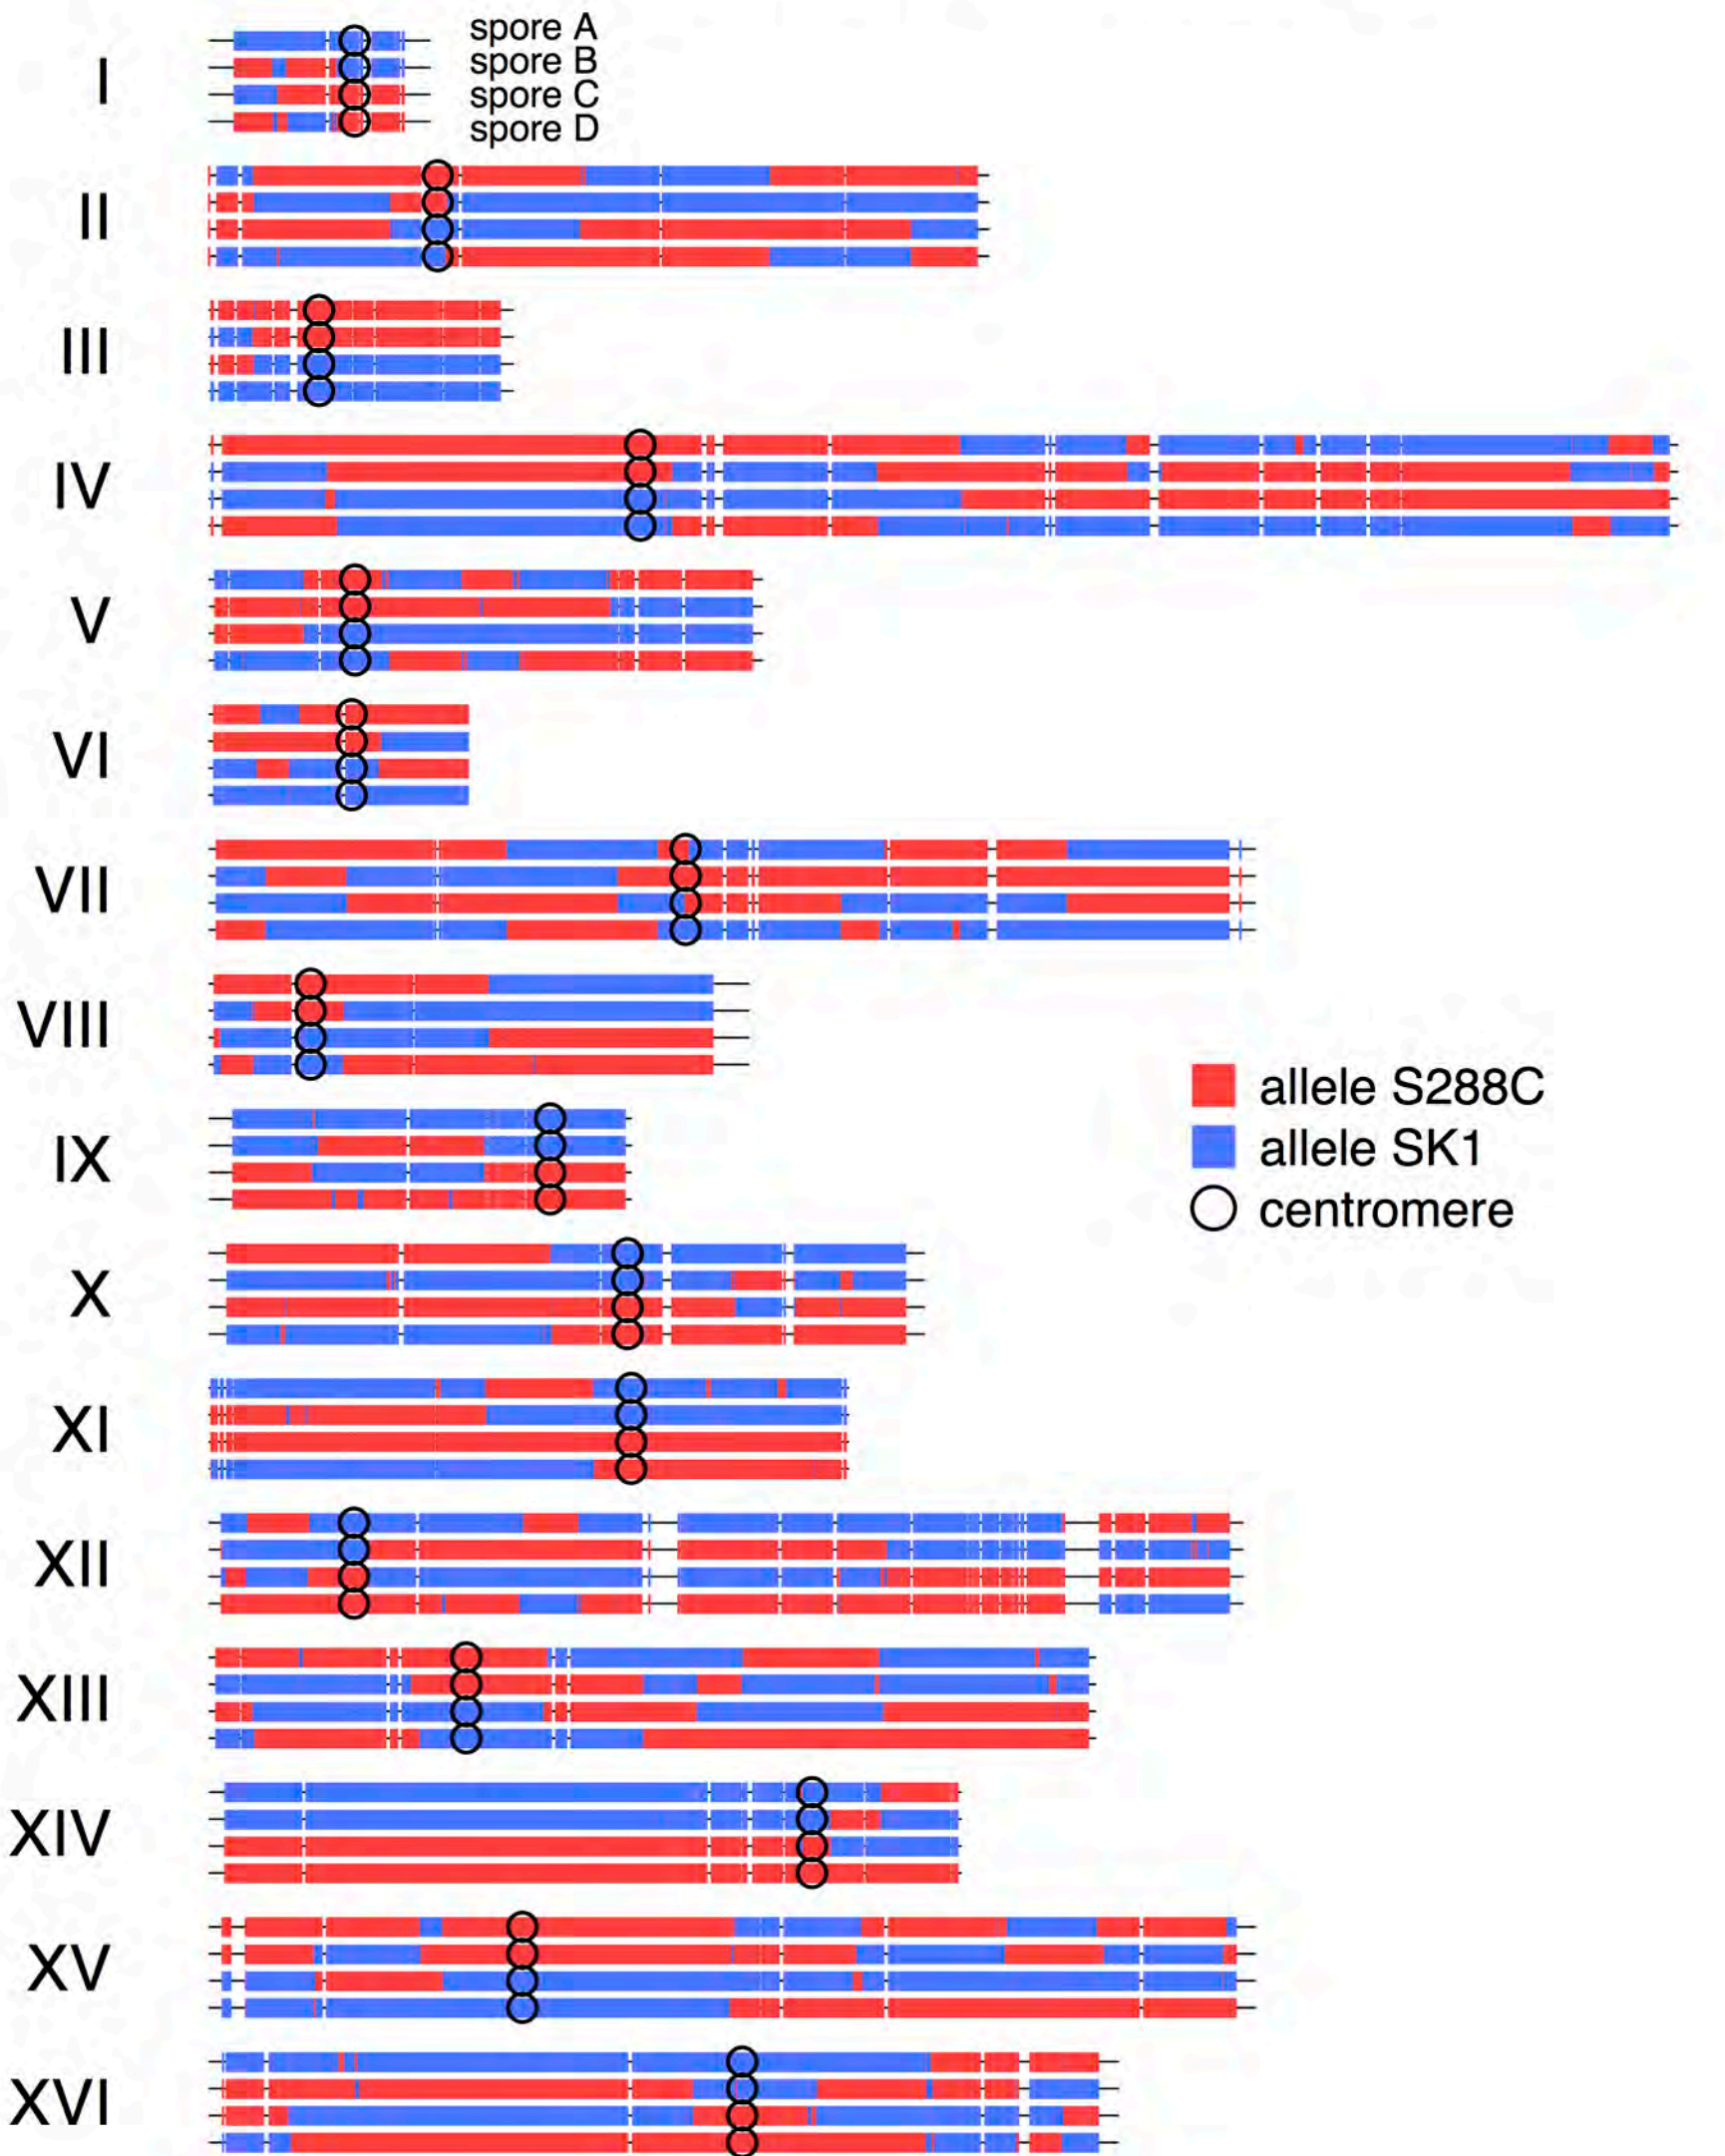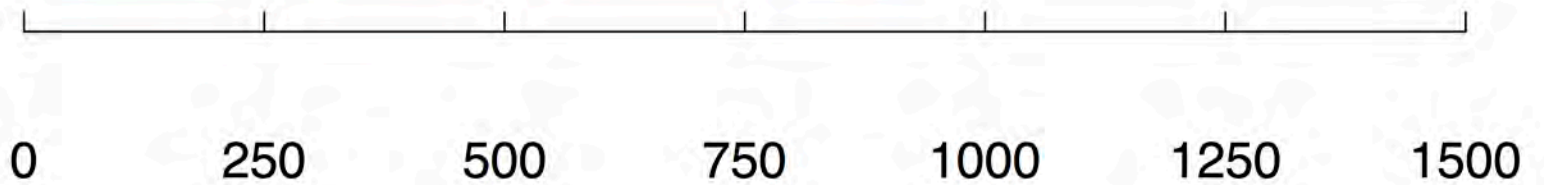

Supplement: pgen.1006226.s007.pdf [file pgen.1006226.s007.pdf]
