# Supplementary material for: Mek1 Down Regulates Rad51 Activity during Yeast Meiosis by Phosphorylation of Hed1
Source: PubMed Central journal article supplement (PMC4970670; doi:10.1371/journal.pgen.1006226), 2016-08-02
Supplement: pgen.1006226.s009.pdf [file pgen.1006226.s009.pdf]

hed1\_dmc1 tetrad1, E5, case1

Chr10

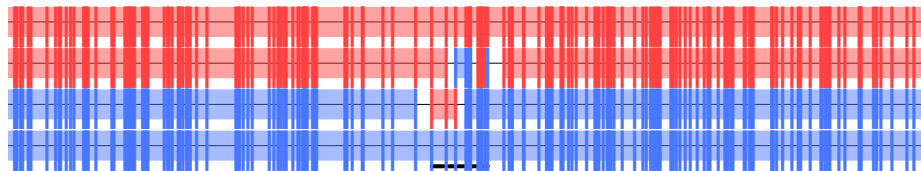

250000

255000

260000

265000

position

hed1\_dmc1 tetrad1, E5, case2

Chr12

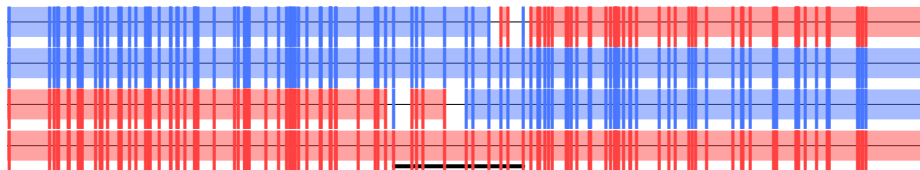

245000

250000

255000

260000

position

hed1\_dmc1 tetrad1, E5, case3

Chr12

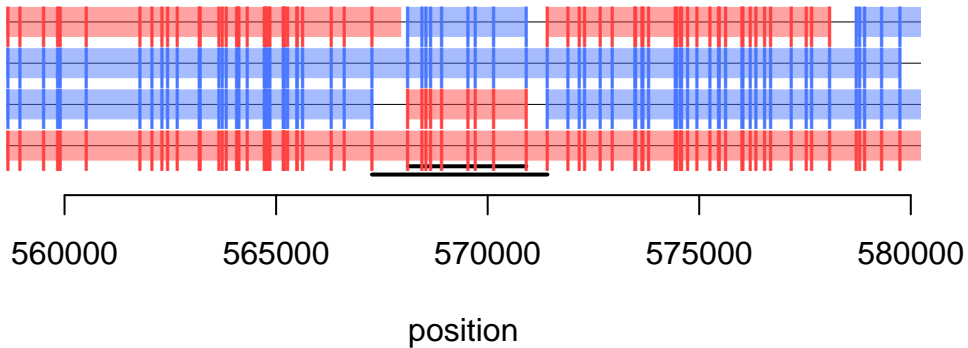

hed1\_dmc1 tetrad2, E5, case4

Chr4

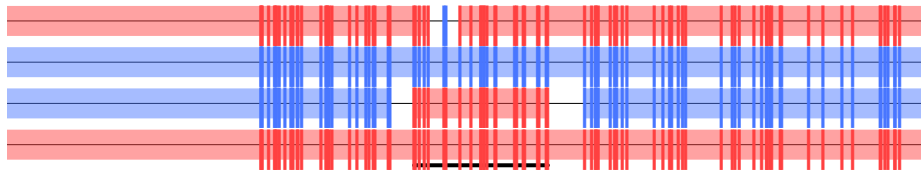

1100000

1105000

1110000

1115000

position

hed1\_dmc1 tetrad2, E5, case5

Chr10

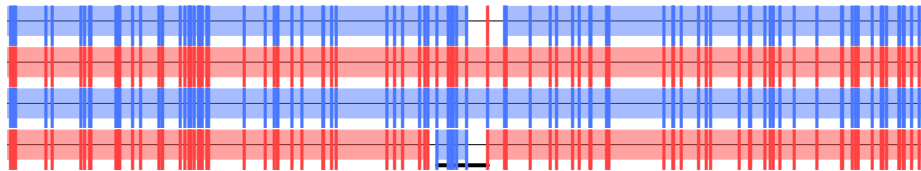

675000

680000

685000

690000

position

hed1\_dmc1 tetrad3, E5, case6

Chr4

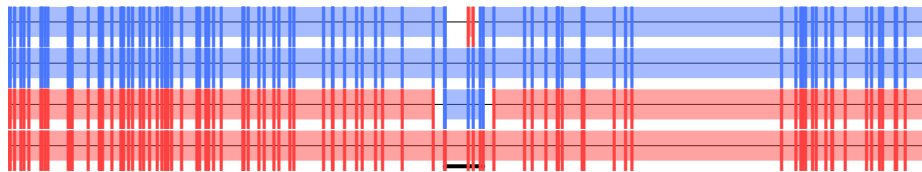

1230000

1235000

1240000

1245000

position

hed1\_dmc1 tetrad3, E5, case7

Chr14

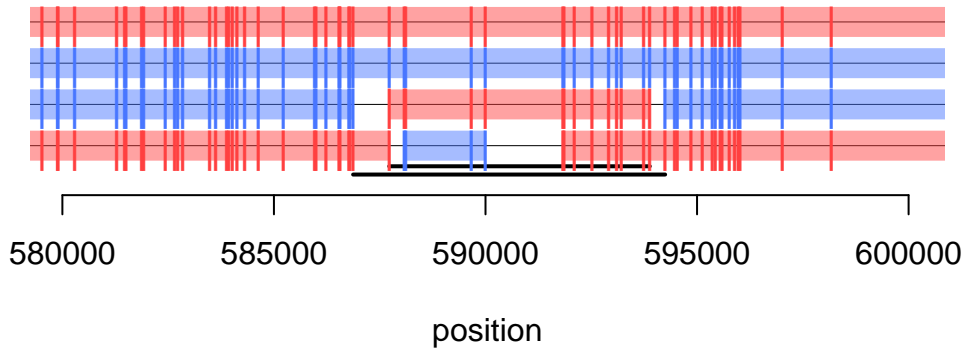

hed1\_dmc1 tetrad4, E5, case8

Chr3

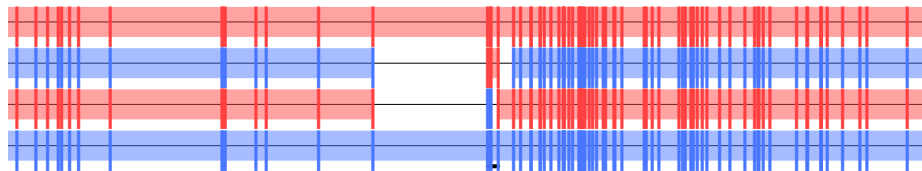

200000

205000

210000

215000

position



hed1\_dmc1 tetrad4, E5, case9

Chr8

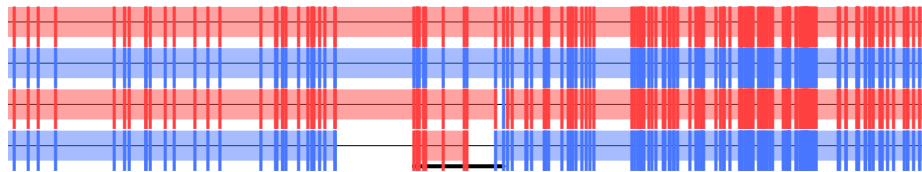

135000

140000

145000

150000

position

# hed1\_dmc1 tetrad4, E5, case10

Chr13

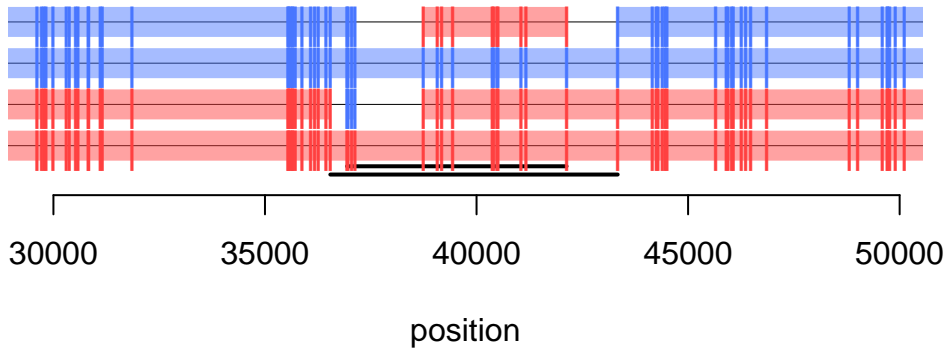

hed1\_dmc1 tetrad5, E5, case11

Chr7

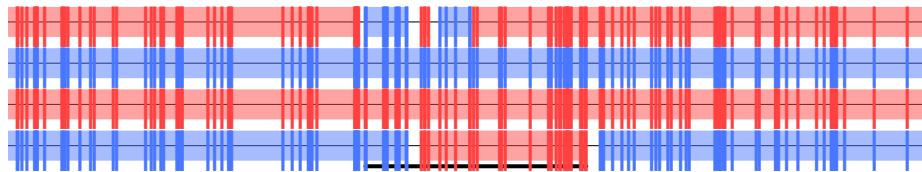

360000

365000

370000

375000

position

hed1\_dmc1 tetrad5, E5, case12

Chr12

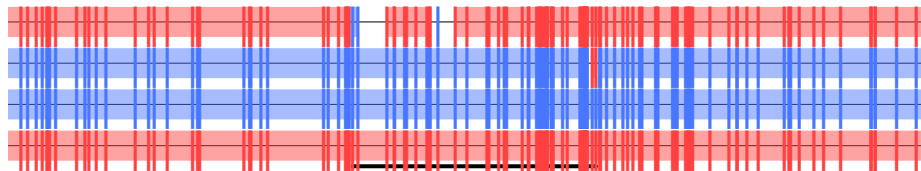

335000

340000

345000

350000

position

# hed1\_dmc1 tetrad5, E5, case13

Chr12

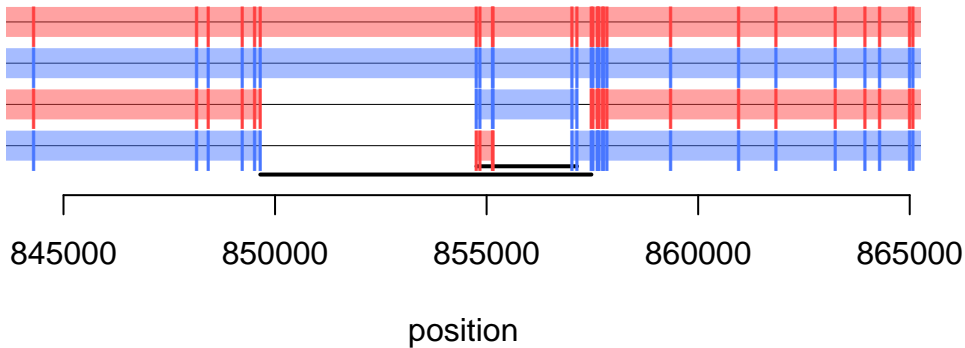

hed1\_dmc1 tetrad6, E5, case14

Chr7

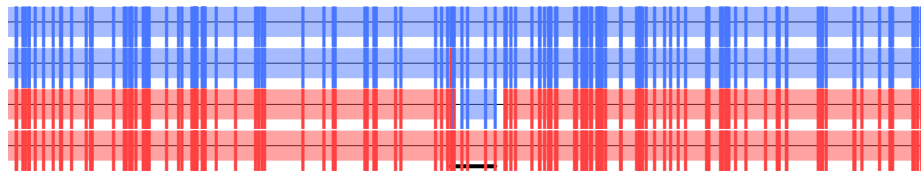

610000

615000

620000

625000

position

# hed1\_dmc1 tetrad6, E5, case15

Chr8

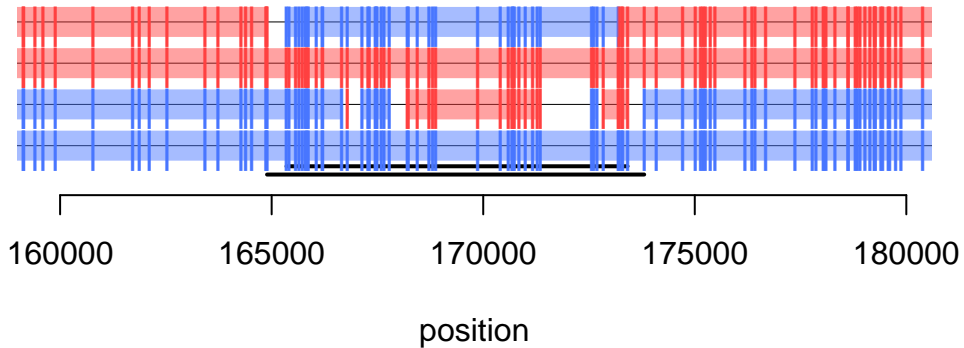

hed1\_dmc1 tetrad6, E5, case16

Chr11

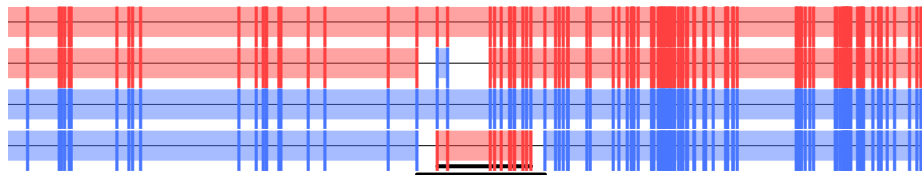

300000

305000

310000

315000

position



hed1\_dmc1 tetrad6, E5, case17

Chr14

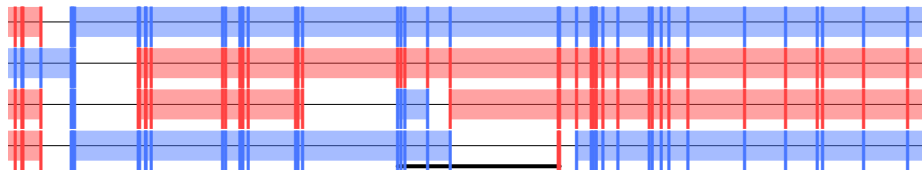

655000

660000

665000

670000

position

hed1\_dmc1 tetrad6, E5, case18

Chr16

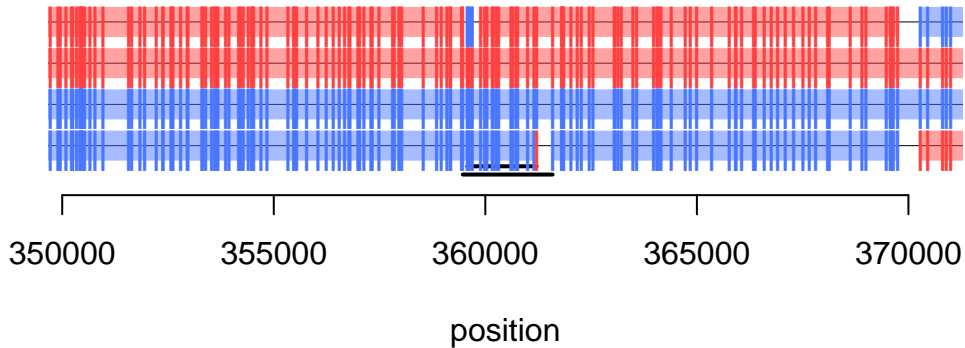

hed1\_dmc1 tetrad7, E5, case19

Chr1

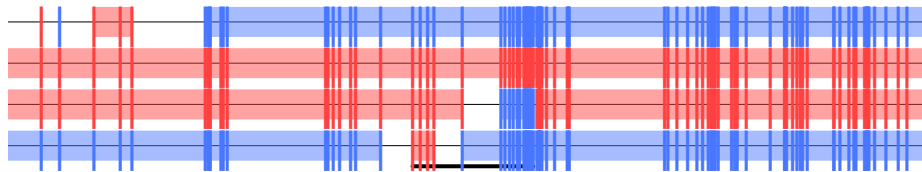

85000

90000

95000

100000

position

hed1\_dmc1 tetrad7, E5, case20

Chr7

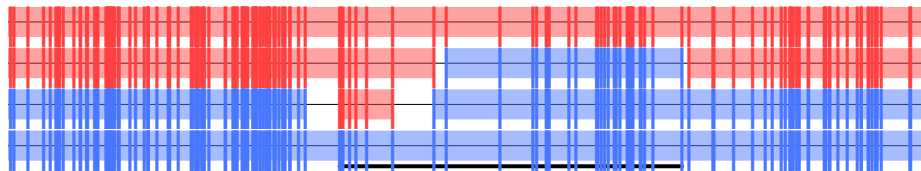

20000

25000

30000

35000

position

hed1\_dmc1 tetrad7, E5, case21

Chr7

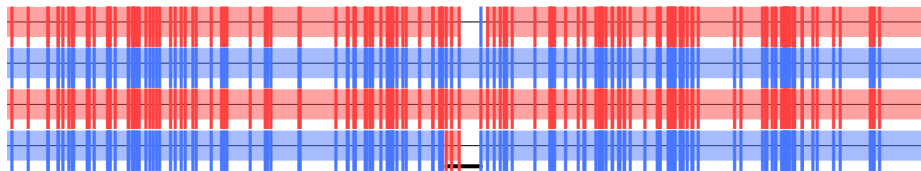

305000

310000

315000

320000

position

hed1\_dmc1 tetrad8, E5, case22

Chr4

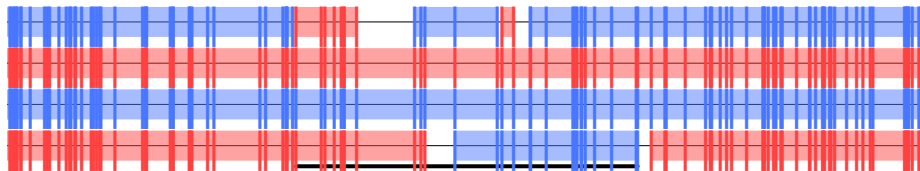

390000

395000

400000

405000

position

hed1\_dmc1 tetrad8, E5, case23

Chr4

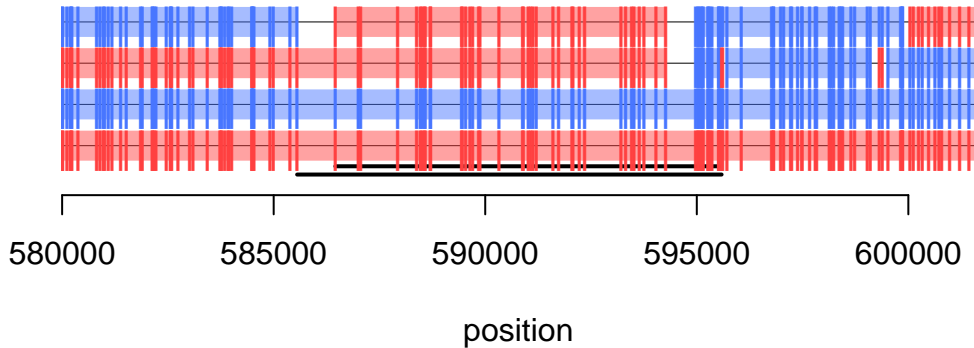

hed1\_dmc1 tetrad8, E5, case24

Chr8

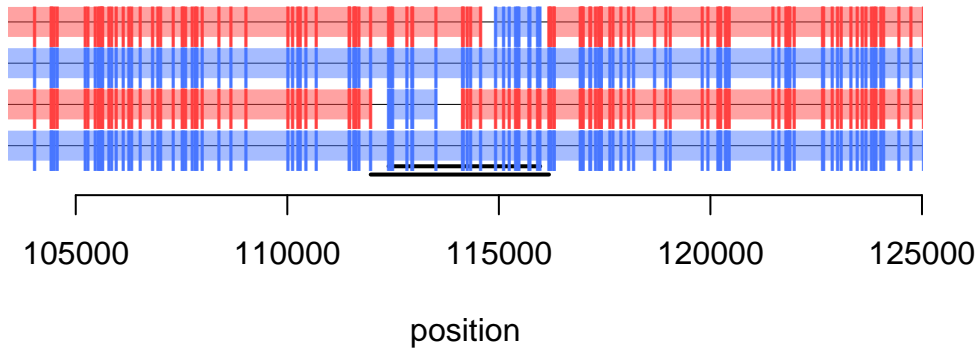



hed1\_dmc1 tetrad8, E5, case25

Chr12

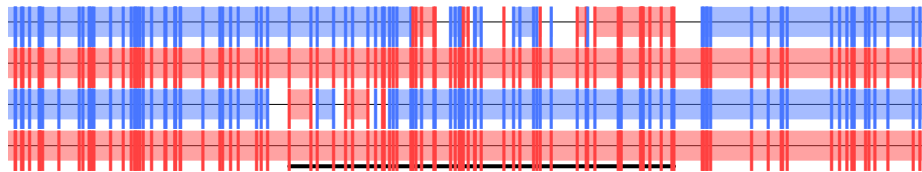

250000

255000

260000

265000

position

hed1\_dmc1 tetrad8, E5, case26

Chr13

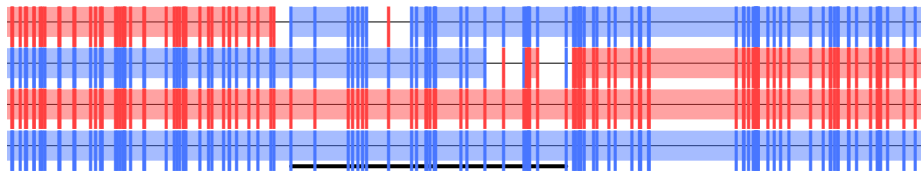

335000

340000

345000

350000

position

hed1\_dmc1 tetrad8, E5, case27

Chr14

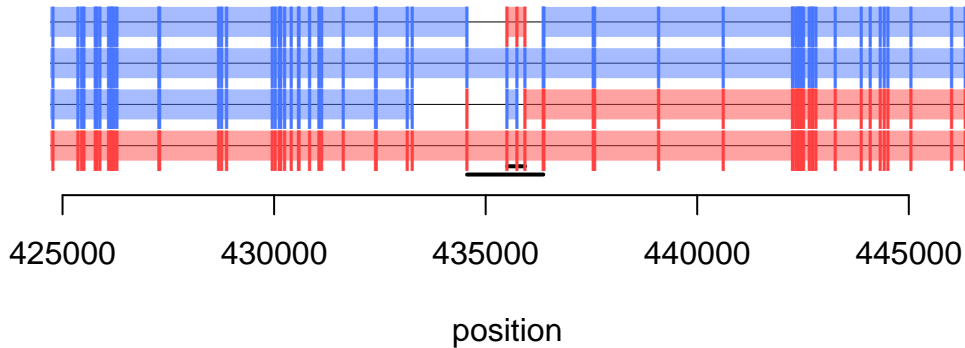

hed1\_dmc1 tetrad8, E5, case28

Chr15

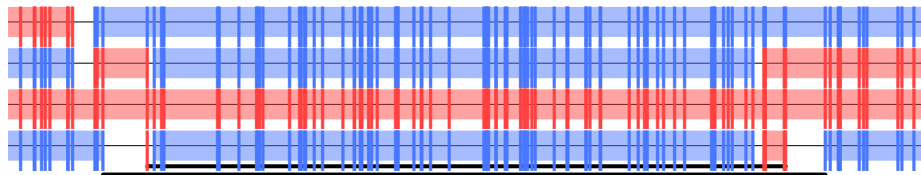

455000

460000

465000

470000

position

hed1\_dmc1 tetrad9, E5, case29

Chr13

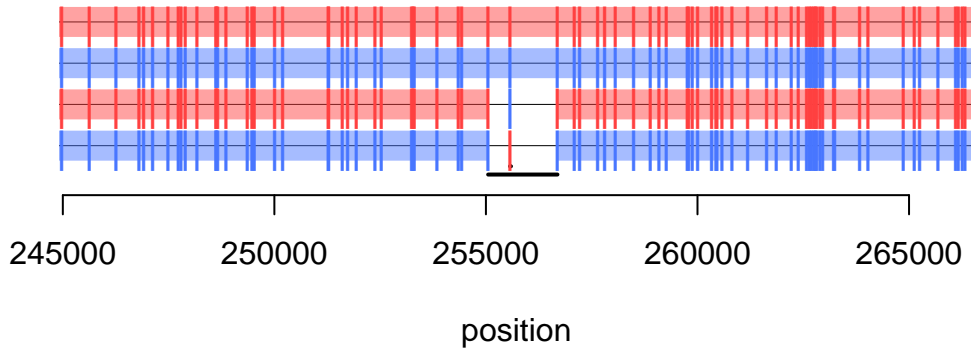

hed1\_dmc1 tetrad10, E5, case30

Chr2

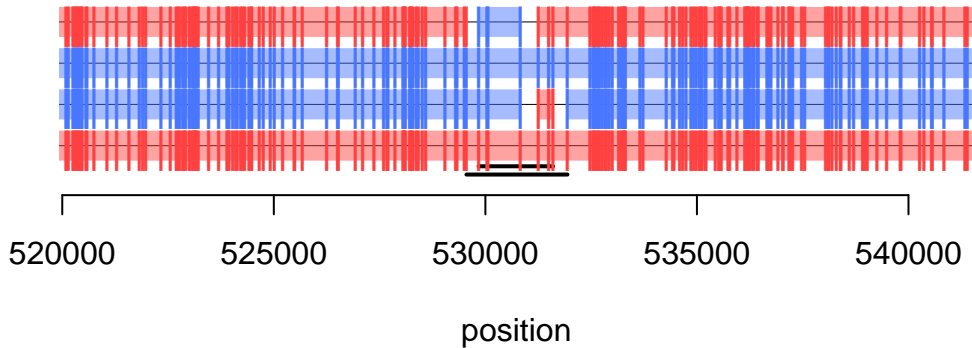

hed1\_dmc1 tetrad10, E5, case31

Chr8

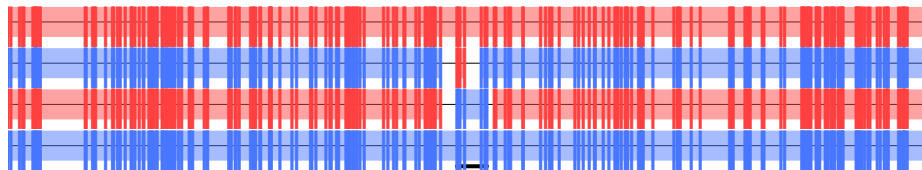

15000

20000

25000

30000

position

hed1\_dmc1 tetrad11, E5, case32

Chr10

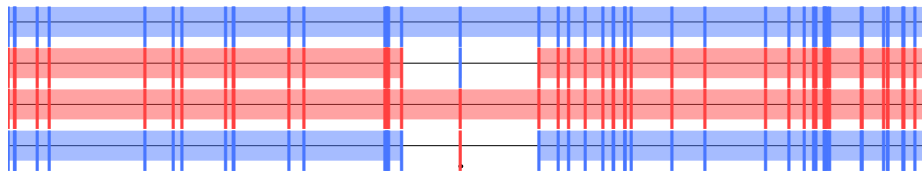

505000

510000

515000

520000

position



hed1\_dmc1 tetrad11, E5, case33

Chr11

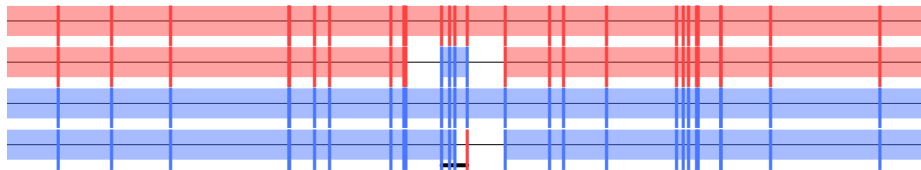

45000

50000

55000

60000

position

hed1\_dmc1 tetrad12, E5, case34

Chr7

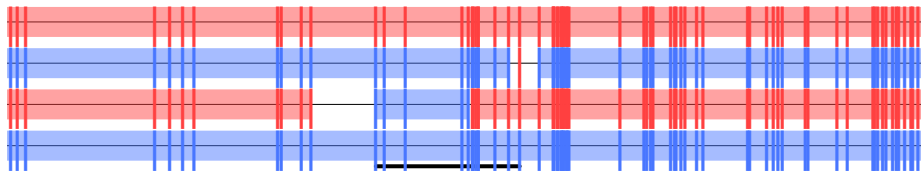

245000

250000

255000

260000

position

hed1\_dmc1 tetrad12, E5, case35

Chr10

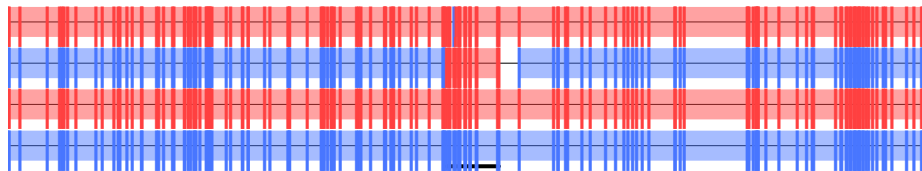

140000

145000

150000

155000

position

hed1\_dmc1 tetrad1, E6, case1

Chr1

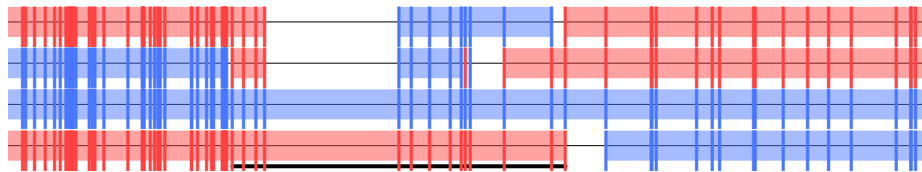

100000

105000

110000

115000

position

hed1\_dmc1 tetrad1, E6, case2

Chr4

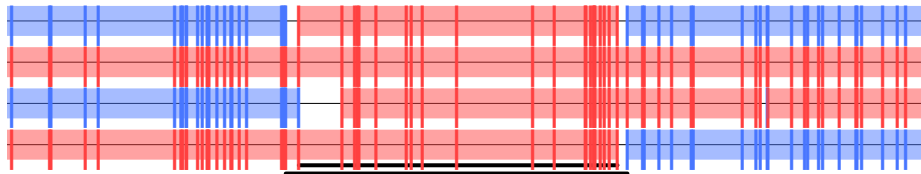

120000

125000

130000

135000

position

hed1\_dmc1 tetrad1, E6, case3

Chr5

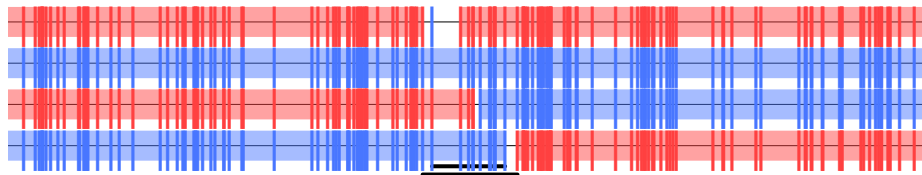

70000

75000

80000

85000

position

hed1\_dmc1 tetrad1, E6, case4

Chr7

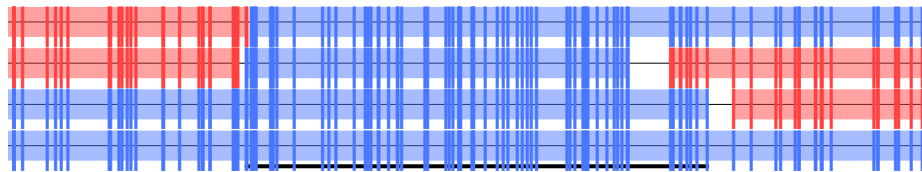

1005000

1010000

1015000

1020000

position

hed1\_dmc1 tetrad1, E6, case5

Chr11

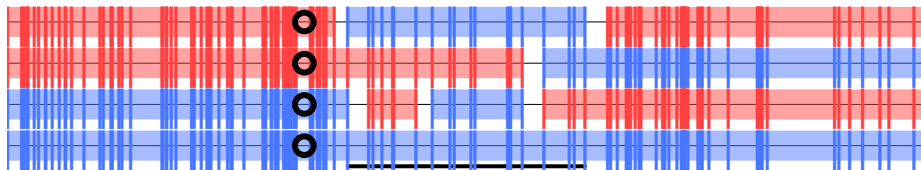

435000

440000

445000

450000

position



hed1\_dmc1 tetrad2, E6, case6

Chr4

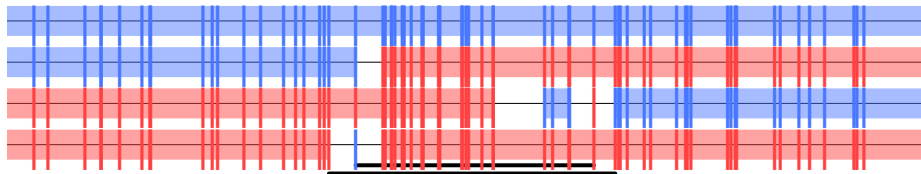

740000

745000

750000

755000

position

hed1\_dmc1 tetrad2, E6, case7

Chr14

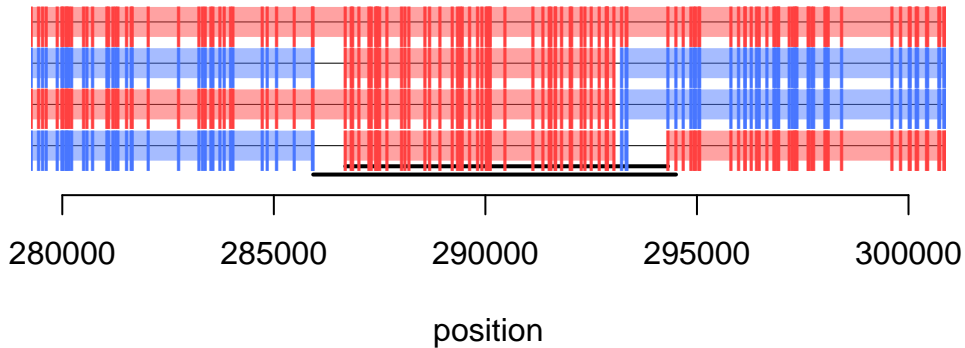

hed1\_dmc1 tetrad2, E6, case8

Chr16

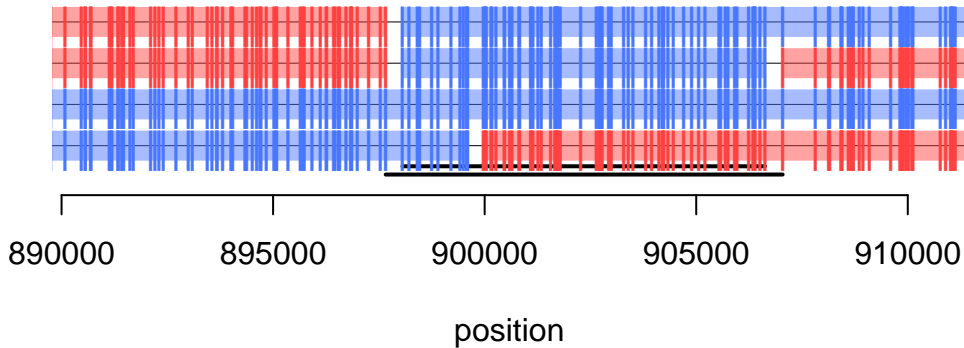

hed1\_dmc1 tetrad3, E6, case9

Chr15

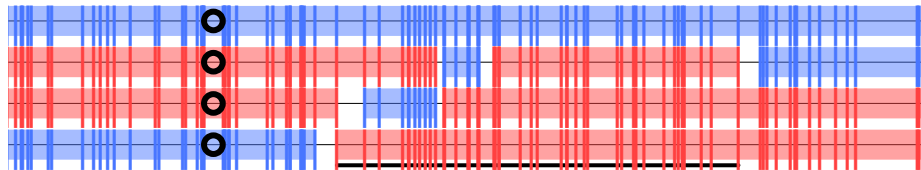

325000

330000

335000

340000

position

# hed1\_dmc1 tetrad4, E6, case10

Chr4

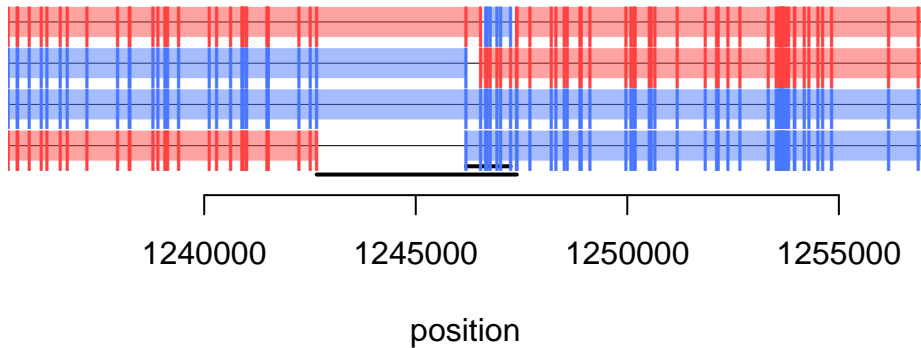

hed1\_dmc1 tetrad4, E6, case11

Chr7

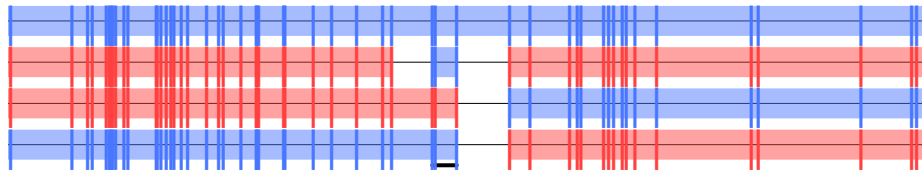

85000

90000

95000

100000

position

hed1\_dmc1 tetrad4, E6, case12

Chr7

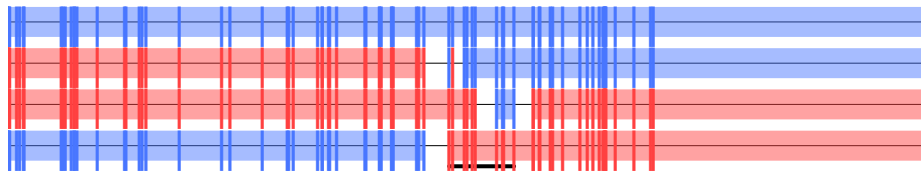

550000

555000

560000

565000

position

hed1\_dmc1 tetrad4, E6, case13

Chr11

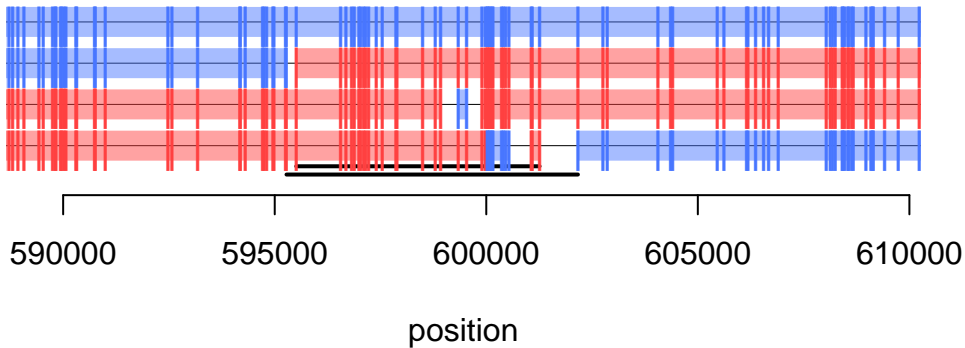



hed1\_dmc1 tetrad4, E6, case14

Chr12

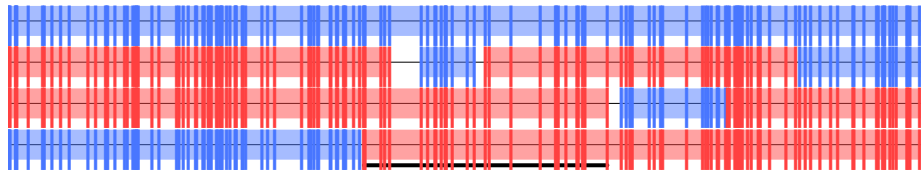

225000

230000

235000

240000

position

# hed1\_dmc1 tetrad5, E6, case15

Chr2

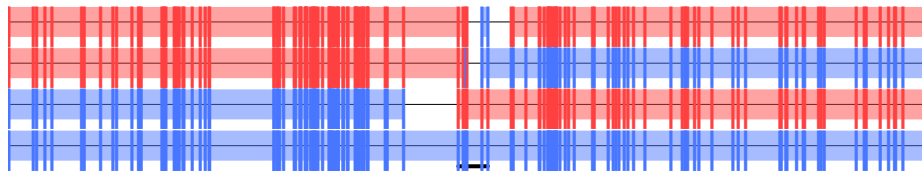

300000

305000

310000

315000

position

hed1\_dmc1 tetrad5, E6, case16

Chr4

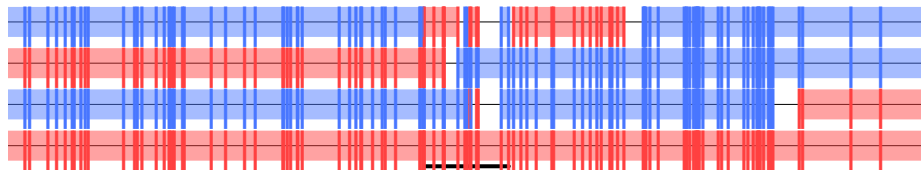

1115000

1120000

1125000

1130000

position

hed1\_dmc1 tetrad5, E6, case17

Chr8

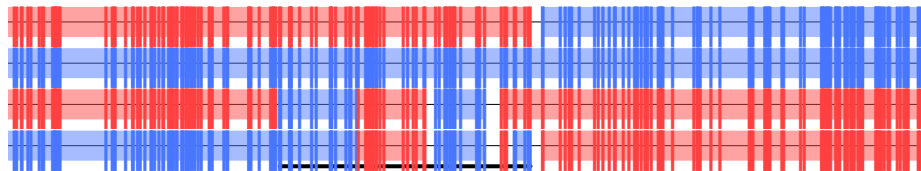

15000

20000

25000

30000

position

hed1\_dmc1 tetrad5, E6, case18

Chr9

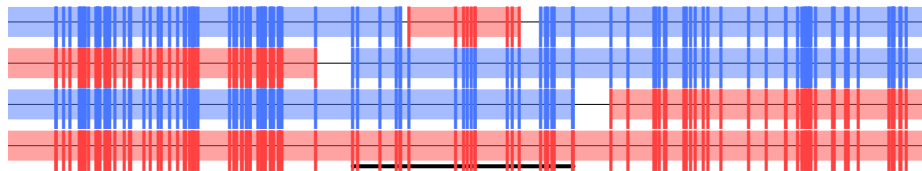

245000

250000

255000

260000

position

hed1\_dmc1 tetrad5, E6, case19

Chr16

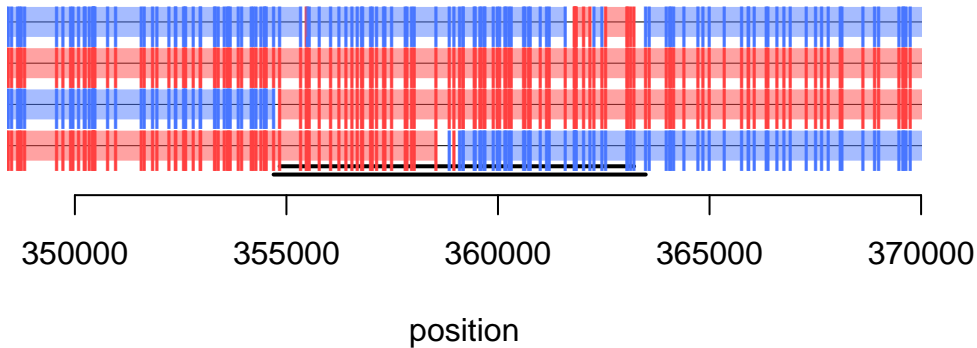

# hed1\_dmc1 tetrad6, E6, case20

Chr7

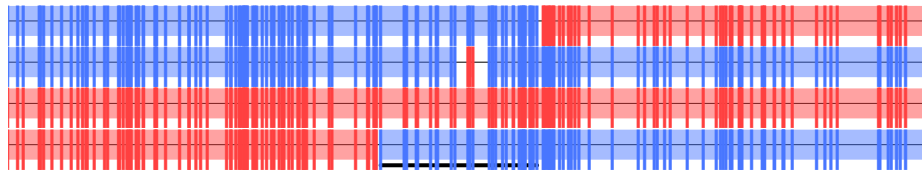

985000

990000

995000

1000000

position

hed1\_dmc1 tetrad6, E6, case21

Chr9

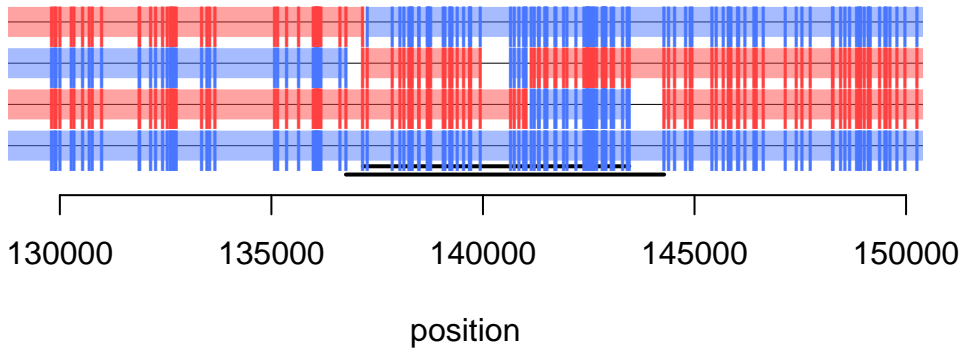



hed1\_dmc1 tetrad6, E6, case22

Chr14

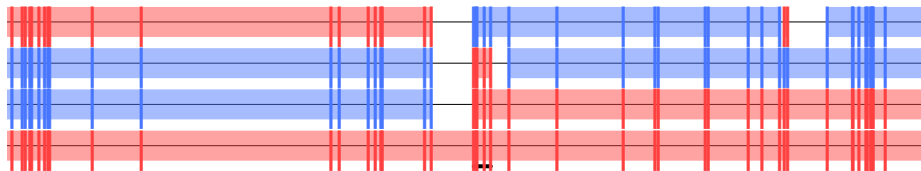

600000

605000

610000

615000

position

hed1\_dmc1 tetrad6, E6, case23

Chr14

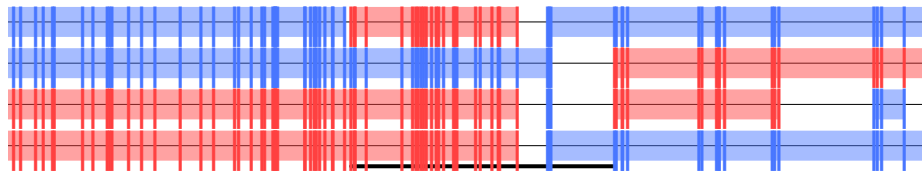

645000

650000

655000

660000

position

hed1\_dmc1 tetrad7, E6, case24

Chr3

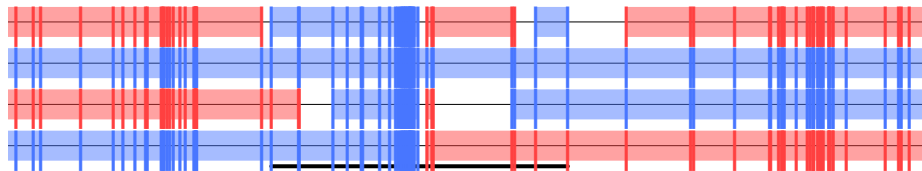

220000

225000

230000

235000

position

hed1\_dmc1 tetrad7, E6, case25

Chr4

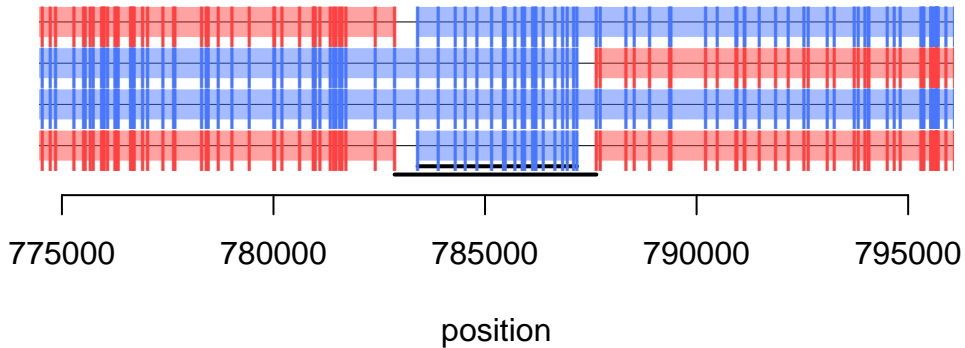

hed1\_dmc1 tetrad7, E6, case26

Chr4

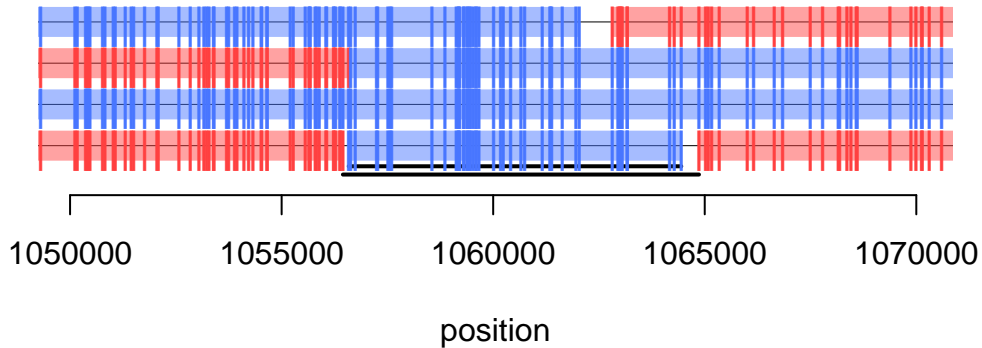

hed1\_dmc1 tetrad7, E6, case27

Chr13

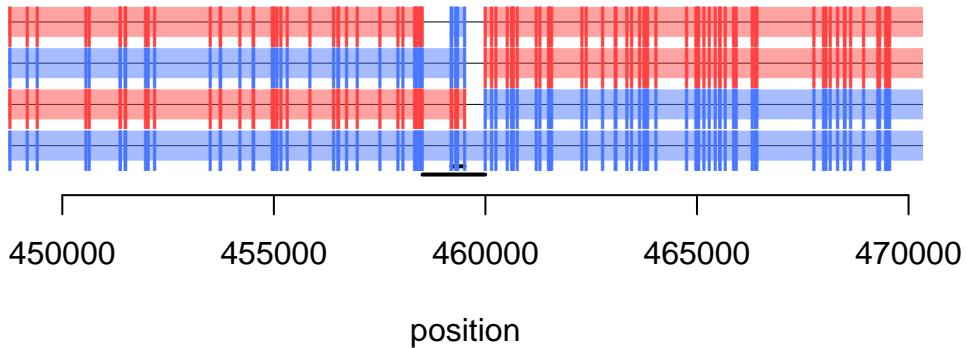

# hed1\_dmc1 tetrad8, E6, case28

Chr7

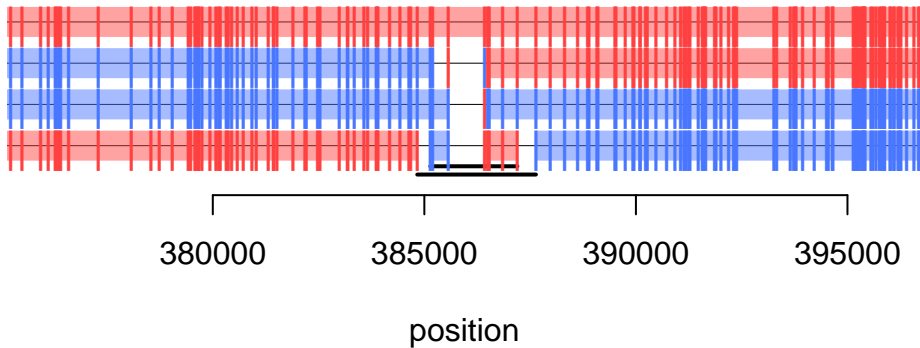

hed1\_dmc1 tetrad8, E6, case29

Chr9

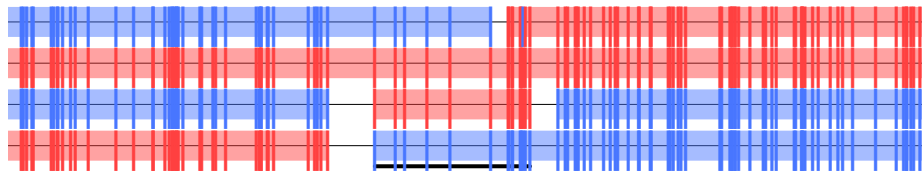

260000

265000

270000

275000

position



# hed1\_dmc1 tetrad8, E6, case30

Chr13

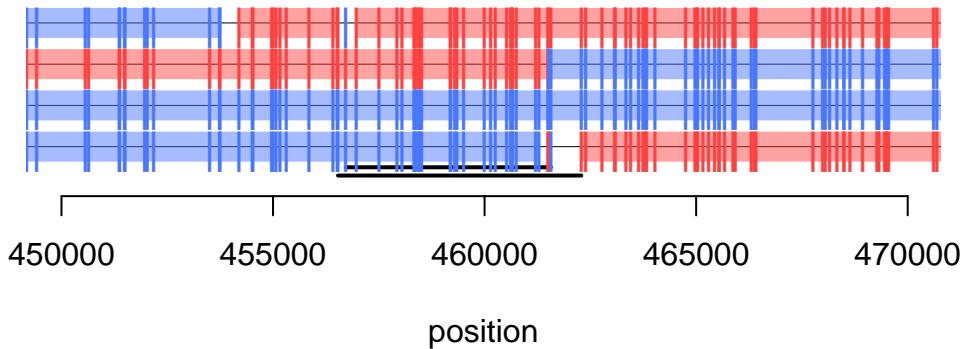

# hed1\_dmc1 tetrad9, E6, case31

Chr3

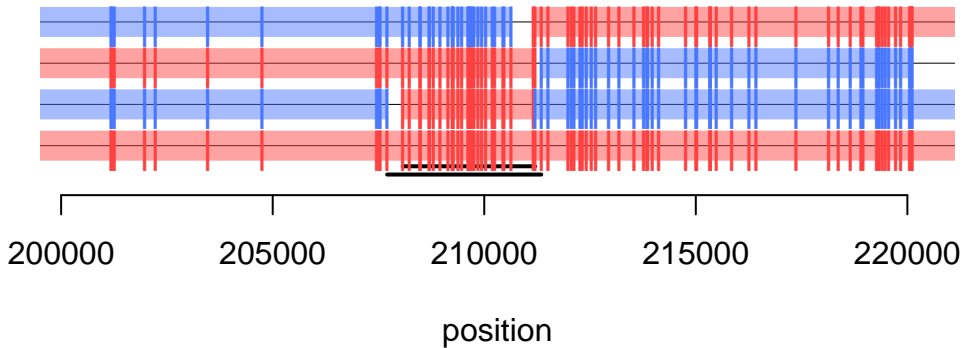

hed1\_dmc1 tetrad9, E6, case32

Chr16

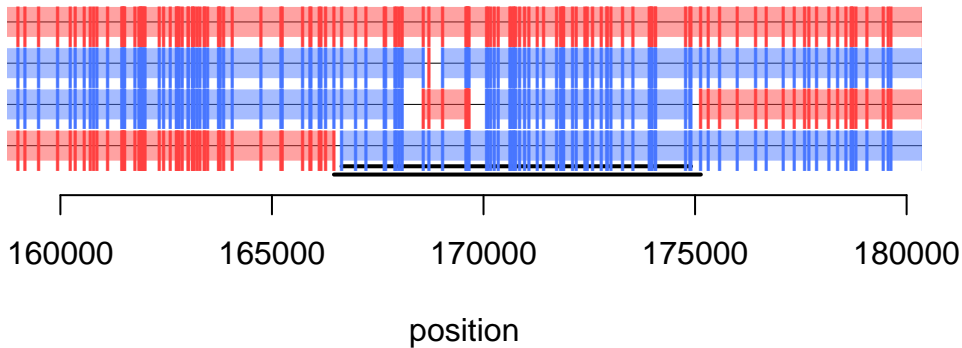

hed1\_dmc1 tetrad10, E6, case33

Chr4

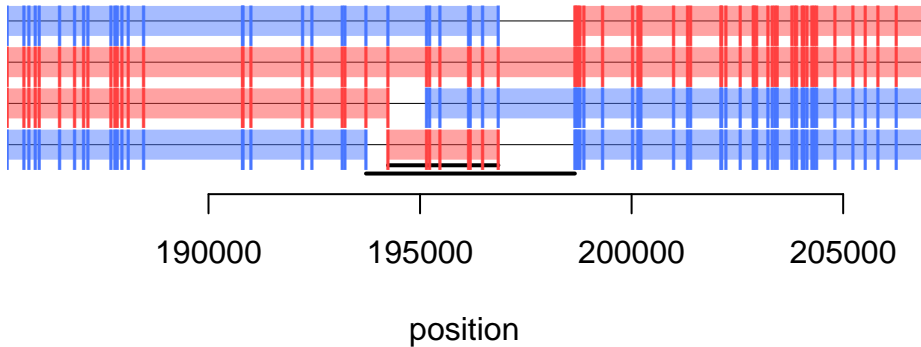

hed1\_dmc1 tetrad10, E6, case34

Chr9

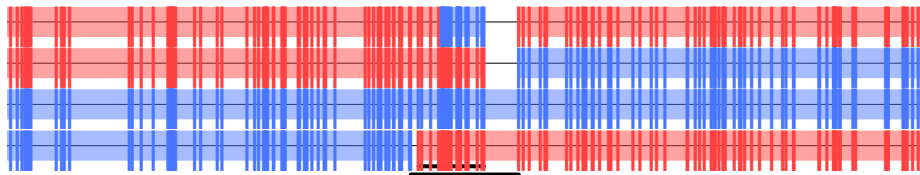

135000

140000

145000

150000

position

hed1\_dmc1 tetrad10, E6, case35

Chr13

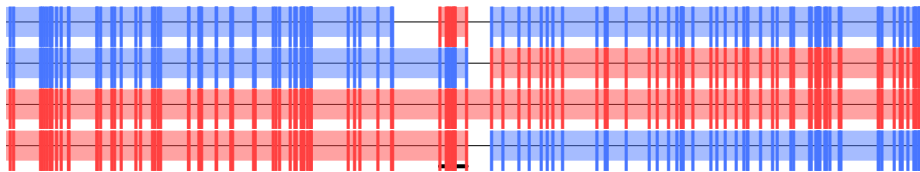

305000

310000

315000

320000

position

hed1\_dmc1 tetrad11, E6, case36

Chr1

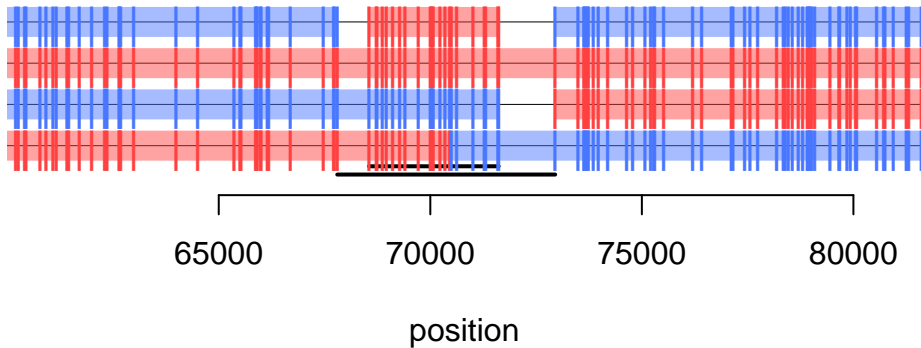

hed1\_dmc1 tetrad11, E6, case37

Chr5

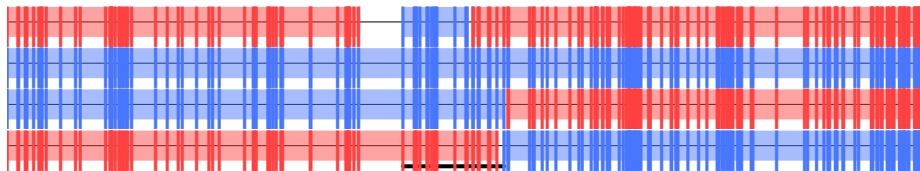

545000

550000

555000

560000

position



hed1\_dmc1 tetrad11, E6, case38

Chr7

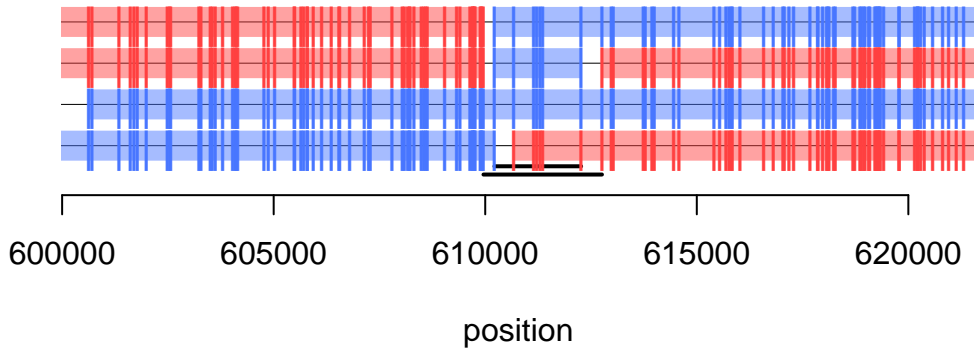

hed1\_dmc1 tetrad11, E6, case39

Chr11

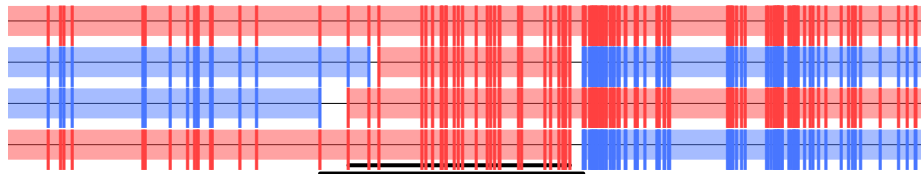

300000

305000

310000

315000

position

hed1\_dmc1 tetrad12, E6, case40

Chr4

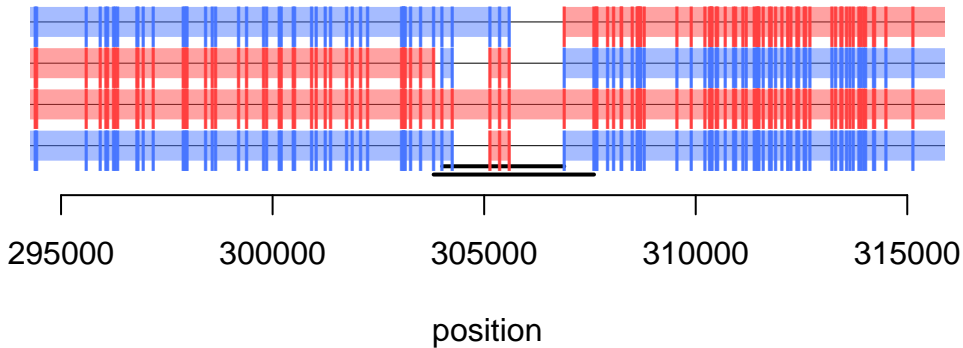

hed1\_dmc1 tetrad12, E6, case41

Chr4

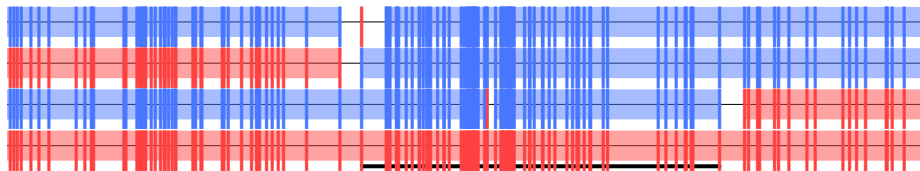

1010000

1015000

1020000

1025000

position

hed1\_dmc1 tetrad5, E7, case1

Chr3

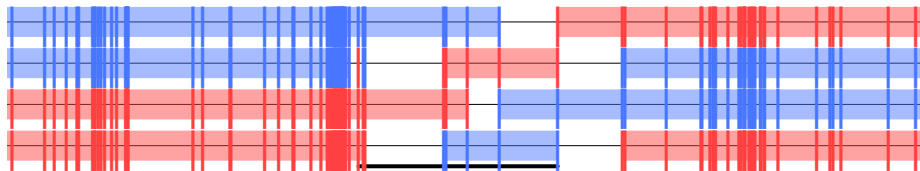

220000

225000

230000

235000

position
